# Supplementary material for: Silver-promoted synthesis of vinyl sulfones from vinyl bromides and sulfonyl hydrazides in water
Source: Royal Society of Chemistry journal article supplement (doi:10.1039/d0cc00784f), 2020-01-01

**Supporting Information for:**

## **Silver-Promoted Synthesis of Vinyl Sulfones from Vinyl Bromides and Sulfonyl Hydrazides in Water**

Ge Zhang,<sup>a,b</sup> Jian-Guo Fu,<sup>c</sup> Qian Zhao,<sup>d</sup> Meng-Yao Li,<sup>b</sup> Gui-Shan Zhang,<sup>d</sup> Chen-Guo Feng,<sup>\*b,c</sup>  
Guo-Qiang Lin<sup>\*a,b</sup>

<sup>a</sup> School of Physical Science and Technology, ShanghaiTech University, Shanghai, 201210, China

<sup>b</sup> Key Laboratory of Synthetic Chemistry of Natural Substances, Center for Excellence in Molecular Synthesis, Shanghai Institute of Organic Chemistry, University of Chinese Academy of Sciences, Shanghai, 200032, China

<sup>c</sup> Innovation Research Institute of Traditional Chinese Medicine, Shanghai University of Traditional Chinese Medicine, Shanghai, 201203, China

<sup>d</sup> Jiangsu Key Laboratory of Chiral Drug Development, Jiangsu Aosaikang Pharmaceutical CO., LTD. Nanjing, 211112, China

## **Table of Contents**

|                                                                                      |    |
|--------------------------------------------------------------------------------------|----|
| 1. General Information                                                               | 2  |
| 2. Synthesis of Vinyl Sulfones <b>3</b>                                              | 2  |
| 3. Gram-Scale Synthesis                                                              | 10 |
| 4. Control Experiments                                                               | 11 |
| 5. References                                                                        | 12 |
| 6. Copies of <sup>1</sup> H NMR, <sup>13</sup> C NMR and <sup>19</sup> F NMR Spectra | 13 |

## 1. General Information

All commercially available chemical resources were used as received. Chromatographic purification of products was accomplished using forced flow chromatography on silica gel 60 (300~400  $\mu\text{m}$ ). Thin layer chromatography was performed on silica gel (200~300  $\mu\text{m}$ ). Nuclear Magnetic Resonance (NMR) spectras were acquired on a Varian Mercury 400 operating at 400, 100 and 376 MHz for  $^1\text{H}$ ,  $^{13}\text{C}$ ,  $^{19}\text{F}$  respectively. Chemical shifts were reported in  $\delta$  ppm referenced to an internal  $\text{SiMe}_4$  standard for  $^1\text{H}$  NMR, chloroform- $d$  ( $\delta$  77.16) for  $^{13}\text{C}$  NMR. Multiplicities were reported using the following abbreviations: s = singlet, d = doublet, t = triplet, q = quartet, m = multiple, br = broad resonance. 2,2-Diarylvinyl bromides **1a-1q** and **1a'** were prepared according to the reported procedures,<sup>[1, 2]</sup> and **1r-1u** were obtained from commercial resources. Sulfonyl hydrazides **2d-2f**, **2i-2m** and **2p** were prepared according to the reported procedures,<sup>[3-6]</sup> and **2a-2c**, **2g**, **2n** and **2o** were obtained from commercial resources.

## 2. Synthesis of Vinyl Sulfones **3**

General Procedure: To a 25 mL Schlenk tube charged with a stir bar, vinyl bromides **1** (0.2 mmol), sulfonyl hydrazides **2** (0.3 mmol), AgF (50.8 mg, 0.4 mmol), and DPPH (13.6 mg, 0.03 mmol) were added. After filled with argon, water (5 mL) was added via a syringe. After stirred at 80  $^\circ\text{C}$  for 10 h, the reaction mixture was cooled down to room temperature, washed with brine (15 mL) and extracted with EtOAc (3 $\times$ 10 mL). The combined organic phases were dried over anhydrous  $\text{Na}_2\text{SO}_4$ , filtered, and concentrated under reduced pressure. The residue was purified by silica gel chromatography (PE/EA = 5:1~2:1) to afford pure products **3**.

### (2-tosylethene-1,1-diyl)dibenzene (**3aa**)

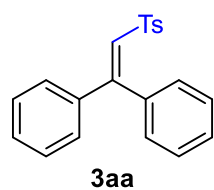

White solid;  $^1\text{H}$  NMR (400 MHz,  $\text{CDCl}_3$ ):  $\delta$  7.47 (d,  $J$  = 8.0 Hz, 2H), 7.41-7.24 (m, 6H), 7.23-7.07 (m, 6H), 6.99 (s, 1H), 2.36 (s, 3H);  $^{13}\text{C}$  NMR (100 MHz,  $\text{CDCl}_3$ ):  $\delta$  154.81, 143.86, 139.32, 138.69, 135.67, 130.34, 129.87, 129.44, 129.06, 128.94, 128.67, 128.31, 127.91, 127.79, 21.68; EI-MS ( $m/z$ , %): 334 ( $\text{M}^+$ , 2.09), 84 (100), 86 (62.74), 57 (34.83); HRMS (EI):  $m/z$  calcd for:  $\text{C}_{21}\text{H}_{18}\text{O}_2\text{S}$ , 334.1028 [ $\text{M}$ ] $^+$ ; found: 334.1034.

### 4,4'-(2-tosylethene-1,1-diyl)bis(methylbenzene) (**3ba**)

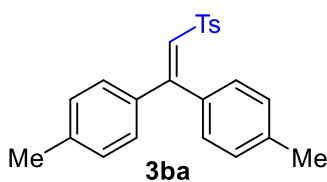

White solid;  $^1\text{H}$  NMR (400 MHz,  $\text{CDCl}_3$ ):  $\delta$  7.50 (d,  $J$  = 8.3 Hz, 2H), 7.15 (d,  $J$  = 8.0 Hz, 2H), 7.12-7.07 (m, 6H), 6.99 (d,  $J$  = 8.0 Hz, 2H), 6.90 (s, 1H), 2.39 (s, 3H), 2.38 (s, 3H), 2.33 (s, 3H);  $^{13}\text{C}$  NMR (100 MHz,  $\text{CDCl}_3$ ):  $\delta$  154.99, 143.72, 140.71, 139.03, 138.94, 136.80, 132.99, 129.91, 129.35, 129.35, 128.55, 128.37, 127.80, 127.66, 21.69, 21.56, 21.39. EI-MS ( $m/z$ , %): 362 ( $\text{M}^+$ , 34.15), 91 (100), 119 (58.6), 148 (38.35); HRMS (EI):  $m/z$  calcd for:  $\text{C}_{23}\text{H}_{22}\text{O}_2\text{S}$ , 362.1341 [ $\text{M}$ ] $^+$ ; found: 362.1342.

#### 4,4'-(2-tosylethene-1,1-diyl)bis(fluorobenzene) (3ca)

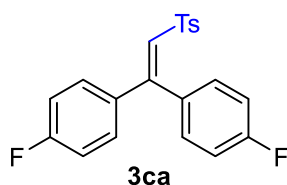

White solid;  $^1\text{H NMR}$  (400 MHz,  $\text{CDCl}_3$ ):  $\delta$  7.50 (d,  $J = 8.3$  Hz, 2H), 7.23-7.14 (m, 4H), 7.14-7.07 (m, 2H), 7.05-6.97 (m, 4H), 6.93 (s, 1H), 2.39 (s, 3H).  $^{13}\text{C NMR}$  (100 MHz,  $\text{CDCl}_3$ ):  $\delta$  164.14 (d,  $J = 248.1$  Hz), 163.30 (d,  $J = 248.1$  Hz), 152.53, 144.21, 138.52, 135.34 (d,  $J = 3.3$  Hz), 131.92 (d,  $J = 8.4$  Hz), 131.45 (d,  $J = 3.4$  Hz), 130.33 (d,  $J = 8.6$  Hz), 129.57, 129.22, 127.74, 115.90 (d,  $J = 21.8$  Hz), 115.189 (d,  $J = 21.6$  Hz), 21.69.  $^{19}\text{F NMR}$  (376 MHz,  $\text{CDCl}_3$ )  $\delta$  -109.76, -111.61; **EI-MS** (m/z, %): 370 ( $\text{M}^+$ , 0.6), 91 (100), 119 (54.67), 84 (45.21); **HRMS** (EI): m/z calcd for:  $\text{C}_{21}\text{H}_{16}\text{O}_2\text{F}_2\text{S}$ , 370.0839 [ $\text{M}$ ] $^+$ ; found: 370.0834.

#### 4,4'-(2-tosylethene-1,1-diyl)bis(chlorobenzene) (3da)

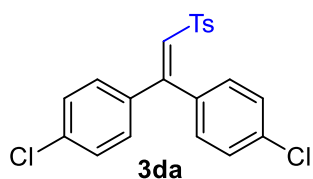

White solid;  $^1\text{H NMR}$  (400 MHz,  $\text{CDCl}_3$ ):  $\delta$  7.51 (d,  $J = 8.3$  Hz, 2H), 7.32-7.25 (m, 4H), 7.21 (d,  $J = 8.1$  Hz, 2H), 7.11 (d,  $J = 8.5$  Hz, 2H), 7.05 (d,  $J = 8.5$  Hz, 2H), 6.95 (s, 1H), 2.41 (s, 3H).  $^{13}\text{C NMR}$  (100 MHz,  $\text{CDCl}_3$ ):  $\delta$  152.01, 144.41, 139.18, 137.37, 136.88, 135.54, 133.73, 131.27, 129.84, 129.66, 129.55, 129.10, 128.41, 127.85, 21.76. **EI-MS** (m/z, %): 402 ( $\text{M}^+$ , 74.12), 212 (100), 91 (97.2), 176 (86.32); **HRMS** (EI): m/z calcd for:  $\text{C}_{21}\text{H}_{16}\text{O}_2\text{SCl}_2$ , 402.0248 [ $\text{M}$ ] $^+$ ; found: 402.0243.

#### 1-methoxy-4-(1-phenyl-2-tosylvinyl)benzene (1:1) (3ea)

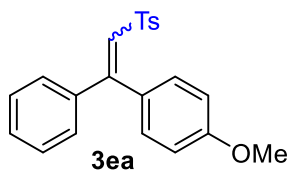

(Isomer ratio = 1:1); White solid;  $^1\text{H NMR}$  (400 MHz,  $\text{CDCl}_3$ ):  $\delta$  7.45 (d,  $J = 8.3$  Hz, 1H), 7.37 (d,  $J = 8.3$  Hz, 1H), 7.28 (d,  $J = 7.3$  Hz, 1H), 7.24-7.18 (m, 2H), 7.14-7.09 (m, 1.5H), 7.09-7.03 (m, 2.5H), 7.01-6.97 (m, 2H), 6.86 (s, 0.5H), 6.81 (s, 0.5H), 6.76-6.70 (m, 2H), 3.77 (s, 1.5H), 3.71 (s, 1.5H), 2.30 (s, 1.5H), 2.29 (s, 1.5H).  $^{13}\text{C NMR}$  (100 MHz,  $\text{CDCl}_3$ ):  $\delta$  161.48, 160.39, 154.81, 154.42, 143.77, 143.62, 139.90, 138.98, 138.82, 135.84, 135.81, 131.68, 131.45, 130.24, 129.83, 129.38, 129.34, 128.79, 128.58, 128.54, 128.36, 127.98, 127.82, 127.69, 127.68, 126.78, 114.03, 113.28, 55.47, 55.38, 21.65, 21.63. **EI-MS** (m/z, %): 364 ( $\text{M}^+$ , 4.79), 191 (100), 84 (80.93), 86 (50.26); **HRMS** (EI): m/z calcd for:  $\text{C}_{22}\text{H}_{20}\text{O}_3\text{S}$ , 364.1133 [ $\text{M}$ ] $^+$ ; found: 364.1143.

#### 1-chloro-4-(1-phenyl-2-tosylvinyl)benzene (3fa)

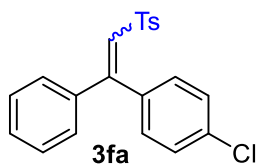

(Isomer ratio = 1:1); White solid;  $^1\text{H NMR}$  (400 MHz,  $\text{CDCl}_3$ ):  $\delta$  7.51 (d,  $J = 8.0$  Hz, 1H), 7.46 (d,  $J = 8.0$  Hz, 1H), 7.41-7.22 (m, 5H), 7.21-7.02 (m, 6H), 6.97 (s, 1H), 2.39 (s, 1.5H), 2.36 (s, 1.5H).  $^{13}\text{C NMR}$  (100 MHz,  $\text{CDCl}_3$ ):  $\delta$  153.41, 153.29, 144.20, 144.00, 138.80, 138.45, 138.39, 137.73, 136.52, 135.20, 135.17, 134.10, 131.26, 130.53, 129.79, 129.77, 129.54, 129.46, 129.37, 129.35, 129.13, 128.89, 128.76, 128.24, 128.17, 128.01, 127.77, 127.72, 21.68, 21.65. **EI-MS** (m/z, %): 368 ( $\text{M}^+$ , 41.53), 178 (100), 212 (57.73), 176 (55.52); **HRMS** (EI): m/z calcd for:  $\text{C}_{21}\text{H}_{17}\text{O}_2\text{SCl}$ , 368.0638 [ $\text{M}$ ] $^+$ ; found: 368.0646.

#### 4-(1-phenyl-2-tosylvinyl)-1,1'-biphenyl (3ga)

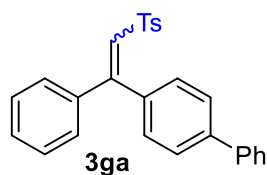

(Isomer ratio = 5:2); White solid;  $^1\text{H NMR}$  (400 MHz,  $\text{CDCl}_3$ ):  $\delta$  7.56-7.157(m, 14H), 7.13-7.03 (m, 4H), 6.95 (m, 1H), 2.31 (m, 3H);  $^{13}\text{C NMR}$  (100 MHz,  $\text{CDCl}_3$ ):  $\delta$  154.37, 143.88, 143.22, 140.00, 139.38, 138.11, 135.64, 130.52, 130.40, 129.92, 129.47, 129.41, 129.03, 128.80, 128.74, 128.45, 128.07, 127.99, 127.91, 127.85, 127.33, 127.23, 127.19, 126.56, 21.70. **EI-MS** (m/z, %): 410 ( $\text{M}^+$ , 3.03), 191 (100), 84 (52.13), 57 (37.56); **HRMS** (EI): m/z calcd for:  $\text{C}_{27}\text{H}_{22}\text{O}_2\text{S}$ , 410.1341 [ $\text{M}$ ] $^+$ ; found: 410.1337.

#### 1-methyl-3-(1-phenyl-2-tosylvinyl)benzene (3ha)

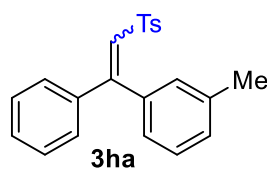

(Isomer ratio = 1:1); White solid;  $^1\text{H NMR}$  (400 MHz,  $\text{CDCl}_3$ ):  $\delta$  7.46 (dd,  $J$  = 8.1, 6.3 Hz, 2H), 7.39-7.33 (m, 1H), 7.32-7.27 (m, 2H), 7.23-7.07 (m, 6H), 7.03 (s, 0.5H), 6.99-6.92 (m, 2H), 6.73 (s, 0.5H), 2.38 (m, 3H), 2.29 (s, 1.5H), 2.25 (s, 1.5H).  $^{13}\text{C NMR}$  (100 MHz,  $\text{CDCl}_3$ ):  $\delta$  155.07, 143.80, 143.71, 139.36, 139.28, 138.77, 138.43, 137.51, 135.77, 135.53, 131.14, 130.30, 130.12, 129.86, 129.86, 129.62, 129.41, 129.31, 129.09, 128.90, 128.79, 128.66, 128.55, 128.28, 128.28, 127.86, 127.86, 127.79, 127.12, 125.64, 21.68, 21.65, 21.45, 21.40. **EI-MS** (m/z, %): 348 ( $\text{M}^+$ , 66.65), 192 (100), 178 (80.87), 193 (55.08); **HRMS** (EI): m/z calcd for:  $\text{C}_{22}\text{H}_{20}\text{O}_2\text{S}$ , 348.1184 [ $\text{M}$ ] $^+$ ; found: 348.1196.

#### 1-chloro-3-(1-phenyl-2-tosylvinyl)benzene (3ia)

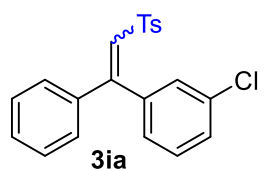

(Isomer ratio = 1:1); White solid;  $^1\text{H NMR}$  (400 MHz,  $\text{CDCl}_3$ ):  $\delta$  7.47 (d,  $J$  = 8.0 Hz, 2H), 7.43-7.35 (m, 1H), 7.36-7.27 (m, 3.5H), 7.27-7.03 (m, 6.5H), 6.97 (s, 0.5H), 6.83 (s, 0.5H), 2.40 (s, 1.5H), 2.38 (s, 1.5H).  $^{13}\text{C NMR}$  (100 MHz,  $\text{CDCl}_3$ ):  $\delta$  153.23, 152.97, 144.29, 144.11, 141.22, 138.39, 138.33, 137.26, 135.03, 134.77, 134.04, 130.61, 130.23, 130.23, 129.99, 129.92, 129.80, 129.56, 129.52, 129.32, 129.24, 128.96, 128.84, 128.34, 128.22, 128.14, 128.08, 127.83, 127.78, 126.51, 21.69, 21.69. **EI-MS** (m/z, %): 368 ( $\text{M}^+$ , 41.53), 178 (100), 212 (57.73), 176 (55.52); **HRMS** (EI): m/z calcd for:  $\text{C}_{21}\text{H}_{17}\text{O}_2\text{SCl}$ , 368.0638 [ $\text{M}$ ] $^+$ ; found: 368.0646.

#### 1-methyl-2-(1-phenyl-2-tosylvinyl)benzene (3ja)

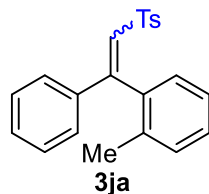

(Isomer ratio = 1:1); White solid;  $^1\text{H NMR}$  (400 MHz,  $\text{CDCl}_3$ ):  $\delta$  7.58 (d,  $J$  = 8.2 Hz, 0.33H), 7.41-7.16 (m, 9.16H), 7.16-7.10 (m, 2.66H), 7.08-7.03 (m, 1.66H), 6.59 (s, 0.16H), 2.38 (s, 3H), 2.04 (s, 0.5H), 1.69 (s, 2.5H).  $^{13}\text{C NMR}$  (100 MHz,  $\text{CDCl}_3$ ):  $\delta$  154.48, 143.92, 138.33, 137.74, 136.34, 134.55, 131.37, 131.02, 130.39, 130.09, 130.08, 129.94, 129.51, 129.47, 129.33, 129.15, 128.93, 128.86, 127.99, 127.78, 127.67, 127.37, 125.92, 125.29, 21.68, 20.35, 19.59, 17.79. **EI-MS** (m/z, %): 348 ( $\text{M}^+$ , 8.61), 193 (100), 192 (93.17), 115 (55.66); **HRMS** (EI): m/z calcd for:  $\text{C}_{21}\text{H}_{18}\text{O}_3\text{S}$ , 348.1184 [ $\text{M}$ ] $^+$ ; found: 348.1188.

### 1-chloro-2-(1-phenyl-2-tosylvinyl)benzene (3ka)

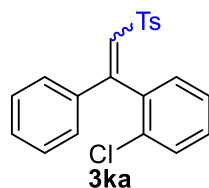

(Isomer ratio = 5:1); White solid;  $^1\text{H NMR}$  (400 MHz,  $\text{CDCl}_3$ ):  $\delta$  7.57 (d,  $J = 8.3$  Hz, 0.33H), 7.51 (d,  $J = 8.3$  Hz, 1.66H), 7.39-7.14 (m, 11H), 7.07 (s, 0.83H), 6.71 (s, 0.16H), 2.39 (s, 2.5H), 2.37 (s, 0.5H).  $^{13}\text{C NMR}$  (100 MHz,  $\text{CDCl}_3$ ):  $\delta$  151.24, 144.26, 137.87, 137.15, 134.24, 133.23, 133.09, 131.94, 130.94, 130.44, 130.22, 129.83, 129.75, 129.58, 129.56, 129.49, 129.37, 128.86, 127.98, 127.83, 127.80, 127.40, 126.90, 126.38, 21.73, 21.70. **EI-MS** (m/z, %): 368 ( $\text{M}^+$ , 0.16), 333 (100), 334 (46.13), 178 (37.18); **HRMS** (EI): m/z calcd for:  $\text{C}_{21}\text{H}_{17}\text{O}_2\text{SCl}$ , 368.0638 [ $\text{M}$ ] $^+$ ; found: 368.0641.

### (E)-2-(1-phenyl-2-tosylvinyl)naphthalene (3la)

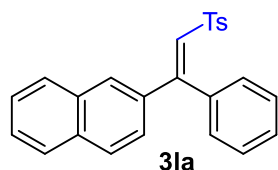

White solid;  $^1\text{H NMR}$  (400 MHz,  $\text{CDCl}_3$ ):  $\delta$  7.85 (d,  $J = 8.2$  Hz, 1H), 7.72 (d,  $J = 8.2$  Hz, 1H), 7.55-7.50 (m, 1H), 7.46 (d,  $J = 6.9$  Hz, 1H), 7.36 (s, 1H), 7.34-7.24 (m, 6H), 7.11 (d,  $J = 8.1$  Hz, 2H), 7.03 (dd,  $J = 12.1, 7.8$  Hz, 2H), 6.70 (d,  $J = 8.1$  Hz, 2H), 2.11 (s, 3H).  $^{13}\text{C NMR}$  (100 MHz,  $\text{CDCl}_3$ ):  $\delta$  153.14, 143.35, 138.23, 133.41, 132.12, 131.61, 130.75, 130.71, 130.46, 129.51, 129.46, 128.93, 128.81, 128.15, 127.68, 127.38, 126.08, 125.70, 125.68, 124.99, 21.39. **EI-MS** (m/z, %): 384 ( $\text{M}^+$ , 1.02), 229 (100), 228 (93.13), 230 (26.32); **HRMS** (EI): m/z calcd for:  $\text{C}_{25}\text{H}_{20}\text{O}_2\text{S}$ , 384.1184 [ $\text{M}$ ] $^+$ ; found: 384.1190. The geometry was tentatively assigned according to the proposed mechanism.

### (E)-1-methyl-4-((2-phenylprop-1-en-1-yl)sulfonyl)benzene (3ma)

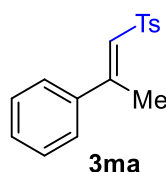

White solid;  $^1\text{H NMR}$  (400 MHz,  $\text{CDCl}_3$ ):  $\delta$  7.85 (d,  $J = 8.3$  Hz, 2H), 7.42-7.32 (m, 7H), 6.60 (d,  $J = 1.2$  Hz, 1H), 2.52 (d,  $J = 1.2$  Hz, 3H), 2.44 (s, 3H);  $^{13}\text{C NMR}$  (100 MHz,  $\text{CDCl}_3$ ):  $\delta$  144.28, 140.41, 134.77, 129.99, 129.94, 128.85, 128.02, 127.97, 127.45, 126.45, 21.75, 17.31. **EI-MS** (m/z, %): 272 ( $\text{M}^+$ , 79.22), 115 (100), 206 (87.43), 105 (74.64); **HRMS** (EI): m/z calcd for:  $\text{C}_{16}\text{H}_{16}\text{O}_2\text{S}$ , 272.0871 [ $\text{M}$ ] $^+$ ; found: 272.0870. The data is consistent with the reported literature.<sup>[7]</sup>

### (E)-1-chloro-4-(1-tosylprop-1-en-2-yl)benzene (3na)

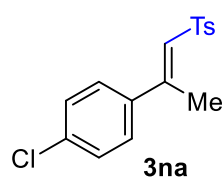

White solid;  $^1\text{H NMR}$  (400 MHz,  $\text{CDCl}_3$ ):  $\delta$  7.85 (d,  $J = 8.3$  Hz, 2H), 7.38-7.30 (m, 6H), 6.59 (d,  $J = 1.2$  Hz, 1H), 2.50 (d,  $J = 1.2$  Hz, 3H), 2.44 (s, 3H).  $^{13}\text{C NMR}$  (100 MHz,  $\text{CDCl}_3$ ):  $\delta$  151.56, 144.42, 139.05, 138.60, 135.95, 130.00, 128.99, 128.24, 127.72, 127.39, 21.72, 17.13. **EI-MS** (m/z, %): 306 ( $\text{M}^+$ , 75.04), 115 (100), 139 (85.18), 240 (66.46); **HRMS** (EI): m/z calcd for:  $\text{C}_{16}\text{H}_{15}\text{O}_2\text{ClS}$ , 306.0481 [ $\text{M}$ ] $^+$ ; found: 306.0487. The geometry was determined by NOE analysis.

### (E)-1-methyl-4-((2-phenylbut-1-en-1-yl)sulfonyl)benzene (3oa)

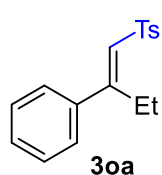

White solid;  $^1\text{H NMR}$  (400 MHz,  $\text{CDCl}_3$ ):  $\delta$  7.86 (d,  $J = 8.2$  Hz, 2H), 7.35 (d,  $J = 7.4$  Hz, 7H), 6.47 (s, 1H), 3.06 (q,  $J = 7.4$  Hz, 2H), 2.44 (s, 3H), 0.97 (t,  $J = 7.4$  Hz, 3H).  $^{13}\text{C NMR}$  (100 MHz,  $\text{CDCl}_3$ ):  $\delta$  159.32, 144.25, 139.54, 139.02, 129.99, 129.76, 128.86, 127.56, 127.40, 126.91, 23.78, 21.77, 13.24. **EI-MS** (m/z, %): 286 ( $\text{M}^+$ , 60.79), 220 (100), 91 (79.69), 251 (62.09); **HRMS** (EI): m/z calcd for:  $\text{C}_{17}\text{H}_{18}\text{O}_2\text{S}$ , 286.1028 [ $\text{M}$ ] $^+$ ; found: 286.1032. The geometry was determined by NOE analysis.

**(Z)-1-((2-cyclohexyl-2-phenylvinyl)sulfonyl)-4-methylbenzene (3pa)**

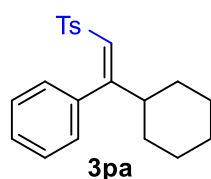

White solid;  $^1\text{H NMR}$  (400 MHz,  $\text{CDCl}_3$ ):  $\delta$  7.27 (ddd,  $J = 22.9, 14.3, 7.5$  Hz, 5H), 7.09 (d,  $J = 8.0$  Hz, 2H), 6.91 (d,  $J = 7.0$  Hz, 2H), 6.46 (s, 1H), 2.36 (s, 3H), 2.14 (t,  $J = 11.0$  Hz, 1H), 1.73 (d,  $J = 10.2$  Hz, 4H), 1.63 (d,  $J = 12.9$  Hz, 1H), 1.14 (ddd,  $J = 23.7, 18.4, 7.0$  Hz, 5H).  $^{13}\text{C NMR}$  (100 MHz,  $\text{CDCl}_3$ ):  $\delta$  162.92, 143.51, 138.87, 136.53, 129.26, 128.41, 128.01, 127.96, 127.63, 127.59, 47.85, 31.31, 26.29, 25.88, 21.65. **EI-MS** (m/z, %): 340 ( $\text{M}^+$ , 59.22), 84 (100), 86 (78.18), 141 (23.8); **HRMS** (EI): m/z calcd for:  $\text{C}_{21}\text{H}_{24}\text{O}_2\text{S}$ , 340.1497 [ $\text{M}$ ] $^+$ ; found: 340.1505. The geometry was determined by NOE analysis.

**(E)-1-((2-fluoro-2-phenylvinyl)sulfonyl)-4-methylbenzene (3qa)**

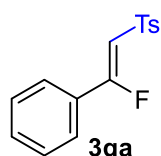

White solid;  $^1\text{H NMR}$  (400 MHz,  $\text{CDCl}_3$ ):  $\delta$  7.94 (d,  $J = 8.0$  Hz, 2H), 7.59-7.32 (m, 7H), 6.56 (d,  $J = 32.3$  Hz, 1H), 2.45 (s, 3H).  $^{13}\text{C NMR}$  (100 MHz,  $\text{CDCl}_3$ ):  $\delta$  162.76, 144.73, 132.51, 129.94, 129.13 (d,  $J = 1.5$  Hz), 127.81 (d,  $J = 1.3$  Hz), 126.02 (d,  $J = 7.8$  Hz), 109.93 (d,  $J = 12.5$  Hz), 21.79.  $^{19}\text{F NMR}$  (376 MHz,  $\text{CDCl}_3$ )  $\delta = -93.48$  (d, 32.3 Hz); **EI-MS** (m/z, %): 276 ( $\text{M}^+$ , 1.33), 84 (100), 86 (65.01), 47 (15.51); **HRMS** (EI): m/z calcd for:  $\text{C}_{15}\text{H}_{13}\text{O}_2\text{FS}$ , 276.0620 [ $\text{M}$ ] $^+$ ; found: 276.0630. The geometry was determined by NOE analysis.

**ethyl (E)-3-tosylacrylate (3ra)**

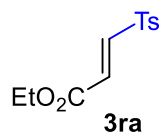

White solid;  $^1\text{H NMR}$  (400 MHz,  $\text{CDCl}_3$ ):  $\delta$  7.80 (d,  $J = 8.1$  Hz, 2H), 7.44-7.24 (m, 3H), 6.80 (d,  $J = 15.2$  Hz, 1H), 4.25 (q,  $J = 7.1$  Hz, 2H), 2.47 (s, 3H), 1.30 (t,  $J = 7.1$  Hz, 3H).  $^{13}\text{C NMR}$  (100 MHz,  $\text{CDCl}_3$ ):  $\delta$  163.66, 145.79, 143.54, 135.50, 130.61, 130.40, 128.52, 62.14, 21.88, 14.17. **EI-MS** (m/z, %): 254 ( $\text{M}^+$ , 24), 139 (100), 91 (28.18), 145 (14.74); **HRMS** (EI): m/z calcd for:  $\text{C}_{12}\text{H}_{14}\text{O}_4\text{S}$ , 254.0613 [ $\text{M}$ ] $^+$ ; found: 254.0618. The data is consistent with the reported literature.<sup>[8]</sup>

**1-methyl-4-((2-methylprop-1-en-1-yl)sulfonyl)benzene (3sa)**

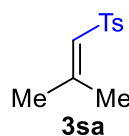

White solid;  $^1\text{H NMR}$  (400 MHz,  $\text{CDCl}_3$ ):  $\delta$  7.78 (d,  $J = 8.2$  Hz, 2H), 7.33 (d,  $J = 8.2$  Hz, 2H), 6.18 (s, 1H), 2.43 (s, 3H), 2.14 (s, 3H), 1.88 (s, 3H);  $^{13}\text{C NMR}$  (100 MHz,  $\text{CDCl}_3$ ):  $\delta$  153.75, 143.95, 139.57, 129.81, 127.19, 126.62, 27.13, 21.64, 19.23. **EI-MS** (m/z, %): 210 ( $\text{M}^+$ , 63.75), 144 (100), 143 (89.75), 139 (69.06); **HRMS** (EI): m/z calcd for:  $\text{C}_{11}\text{H}_{14}\text{O}_2\text{S}$ , 210.0715 [ $\text{M}$ ] $^+$ ; found: 210.0716.

**1-methyl-4-((3-methylbut-2-en-2-yl)sulfonyl)benzene (3ta)**

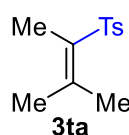

White solid;  $^1\text{H NMR}$  (400 MHz,  $\text{CDCl}_3$ ):  $\delta$  7.74 (d,  $J = 8.2$  Hz, 2H), 7.31 (d,  $J = 8.2$  Hz, 2H), 2.43 (s, 3H), 2.21 (d,  $J = 1.2$  Hz, 3H), 2.00 (s, 3H), 1.86 (s, 3H).  $^{13}\text{C NMR}$  (100 MHz,  $\text{CDCl}_3$ ):  $\delta$  146.84, 143.71, 139.19, 131.36, 129.72, 127.15, 103.58, 24.57, 22.22, 21.70, 16.03. **EI-MS** (m/z, %): 224 ( $\text{M}^+$ , 47.43), 158 (100), 159 (62.86), 139 (57.09); **HRMS** (EI): m/z calcd for:  $\text{C}_{12}\text{H}_{16}\text{O}_2\text{S}$ , 224.0871 [ $\text{M}$ ] $^+$ ; found: 224.0873.

**(E)-1-methyl-4-(styrylsulfonyl)benzene (3ua)**

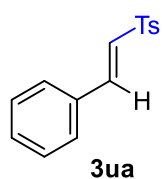

White solid;  $^1\text{H NMR}$  (400 MHz,  $\text{CDCl}_3$ ):  $\delta$  7.83 (d,  $J = 8.3$  Hz, 2H), 7.66 (d,  $J = 15.4$  Hz, 1H), 7.51-7.45 (m, 2H), 7.36 (dd,  $J = 18.2, 7.6$  Hz, 5H), 6.85 (d,  $J = 15.4$  Hz, 1H), 2.43 (s, 3H).  $^{13}\text{C NMR}$  (100 MHz,  $\text{CDCl}_3$ ):  $\delta$  144.50, 142.04, 137.84, 132.55, 131.21, 130.07, 129.16, 128.62, 127.81, 127.73, 21.73. **EI-MS** (m/z, %): 258 ( $\text{M}^+$ , 53.86), 91 (100), 139 (78.84), 77 (39.22); **HRMS** (EI): m/z calcd for:  $\text{C}_{15}\text{H}_{14}\text{O}_2\text{S}$ , 258.0715 [ $\text{M}$ ] $^+$ ; found: 258.0724.

**(2-(phenylsulfonyl)ethene-1,1-diyl)dibenzene (3ab)**

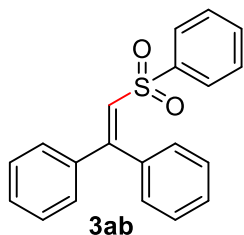

White solid;  $^1\text{H NMR}$  (400 MHz,  $\text{CDCl}_3$ ):  $\delta$  7.50 (d,  $J = 7.3$  Hz, 2H), 7.40 (t,  $J = 7.4$  Hz, 1H), 7.32-7.16 (m, 8H), 7.13 (d,  $J = 7.3$  Hz, 2H), 7.00 (d,  $J = 7.1$  Hz, 2H), 6.95 (s, 1H).  $^{13}\text{C NMR}$  (100 MHz,  $\text{CDCl}_3$ ):  $\delta$  155.31, 141.53, 139.16, 135.54, 132.94, 130.44, 129.84, 128.97, 128.83, 128.77, 128.69, 128.30, 127.95, 127.71. **EI-MS** (m/z, %): 320 ( $\text{M}^+$ , 14.3), 191 (100), 178 (31.18), 57 (28.6); **HRMS** (EI): m/z calcd for:  $\text{C}_{20}\text{H}_{16}\text{O}_2\text{S}$ , 320.0871 [ $\text{M}$ ] $^+$ ; found: 320.0878.

**(2-((4-methoxyphenyl)sulfonyl)ethene-1,1-diyl)dibenzene (3ac)**

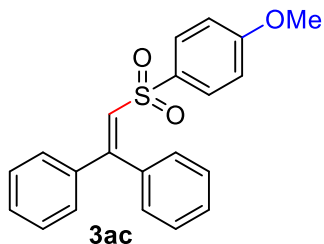

White solid;  $^1\text{H NMR}$  (400 MHz,  $\text{CDCl}_3$ ):  $\delta$  7.42 (d,  $J = 8.9$  Hz, 2H), 7.32-7.26 (m, 1H), 7.26-7.19 (m, 4H), 7.15-7.10 (m, 2H), 7.05-7.00 (m, 2H), 6.93 (s, 1H), 6.73 (d,  $J = 8.9$  Hz, 2H), 3.75 (s, 3H).  $^{13}\text{C NMR}$  (100 MHz,  $\text{CDCl}_3$ ):  $\delta$  163.22, 154.40, 139.32, 135.70, 133.20, 130.29, 129.95, 129.89, 129.45, 128.92, 128.67, 128.27, 127.95, 114.01, 55.73. **EI-MS** (m/z, %): 350 ( $\text{M}^+$ , 34.15), 178 (100), 286 (58.18), 179 (35.4); **HRMS** (EI): m/z calcd for:  $\text{C}_{21}\text{H}_{18}\text{O}_3\text{S}$ , 350.0977 [ $\text{M}$ ] $^+$ ; found: 350.0985.

**(2-((4-tert-butyl)phenyl)sulfonyl)ethene-1,1-diyl)dibenzene (3ad)**

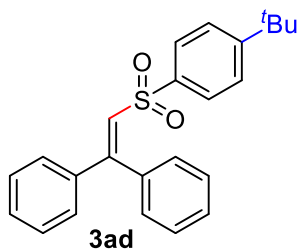

White solid;  $^1\text{H NMR}$  (400 MHz,  $\text{CDCl}_3$ ):  $\delta$  7.50 (d,  $J = 8.6$  Hz, 2H), 7.40-7.24 (m, 8H), 7.23-7.19 (m, 2H), 7.11-7.05 (m, 2H), 7.02 (s, 1H), 1.30 (s, 9H).  $^{13}\text{C NMR}$  (100 MHz,  $\text{CDCl}_3$ ):  $\delta$  156.72, 154.62, 139.28, 138.35, 135.69, 130.32, 129.86, 129.22, 128.85, 128.66, 128.30, 127.91, 127.62, 125.76, 35.20, 31.14. **EI-MS** (m/z, %): 376 ( $\text{M}^+$ , 32.15), 178 (100), 167 (50), 179 (41.89); **HRMS** (EI): m/z calcd for:  $\text{C}_{24}\text{H}_{24}\text{O}_2\text{S}$ , 376.1497 [ $\text{M}$ ] $^+$ ; found: 376.1500.

**(2-((4-chlorophenyl)sulfonyl)ethene-1,1-diyl)dibenzene (3ae)**

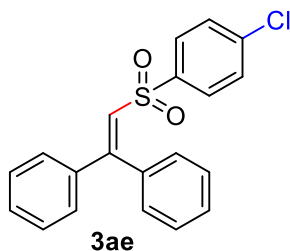

White solid;  $^1\text{H NMR}$  (400 MHz,  $\text{CDCl}_3$ ):  $\delta$  7.46 (d,  $J = 8.6$  Hz, 2H), 7.37 (dt,  $J = 4.9, 4.0$  Hz, 2H), 7.34-7.26 (m, 6H), 7.23-7.18 (m, 2H), 7.08-7.04 (m, 2H), 7.02 (s, 1H).  $^{13}\text{C NMR}$  (100 MHz,  $\text{CDCl}_3$ ):  $\delta$  155.70, 139.89, 139.46, 138.82, 135.36, 130.58, 129.79, 129.16, 129.08, 128.93, 128.69, 128.55, 128.25, 127.96. **EI-MS** (m/z, %): 354 ( $\text{M}^+$ , 25.72), 178 (100), 179 (42.76), 115 (40.19); **HRMS** (EI): m/z calcd for:  $\text{C}_{20}\text{H}_{15}\text{O}_2\text{S}\text{Cl}$ , 354.0481 [ $\text{M}$ ] $^+$ ; found: 354.0476.

**(2-((4-fluorophenyl)sulfonyl)ethene-1,1-diyl)dibenzene (3af)**

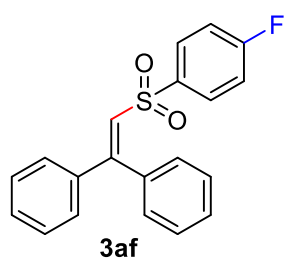

338.0777 [M]<sup>+</sup>; found: 338.0772.

White solid; <sup>1</sup>H NMR (400 MHz, CDCl<sub>3</sub>): δ 7.57-7.51 (m, 2H), 7.41-7.35 (m, 2H), 7.34-7.27 (m, 4H), 7.23-7.18 (m, 2H), 7.09-7.05 (m, 2H), 7.04 (s, 1H), 6.99 (t, *J* = 8.6 Hz, 2H). <sup>13</sup>C NMR (100 MHz, CDCl<sub>3</sub>): δ 165.29 (d, *J* = 257.9 Hz), 155.49, 138.95, 135.46, 130.58, 130.57 (d, *J* = 9.5 Hz), 129.86, 129.10, 128.89, 128.74, 128.29, 128.03, 115.94 (d, *J* = 22.5 Hz). **EI-MS** (*m/z*, %): 338 (M<sup>+</sup>, 40.83), 178 (100), 179 (45.29), 167 (34.39); **HRMS** (EI): *m/z* calcd for: C<sub>20</sub>H<sub>15</sub>O<sub>2</sub>FS, 338.0777 [M]<sup>+</sup>; found: 338.0772.

**(2-((4-iodophenyl)sulfonyl)ethene-1,1-diyl)dibenzene (3ag)**

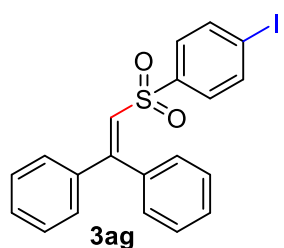

White solid; <sup>1</sup>H NMR (400 MHz, CDCl<sub>3</sub>): δ 7.67 (d, *J* = 8.4 Hz, 2H), 7.42-7.17 (m, 10H), 7.05 (d, *J* = 7.2 Hz, 2H), 7.01 (s, 1H). <sup>13</sup>C NMR (100 MHz, CDCl<sub>3</sub>): δ 155.78, 141.14, 138.90, 137.95, 135.42, 130.63, 129.85, 129.14, 129.12, 128.75, 128.53, 128.31, 128.02, 100.72. **EI-MS** (*m/z*, %): 446 (M<sup>+</sup>, 24.29), 57 (100), 71 (82.35), 178 (76.66); **HRMS** (EI): *m/z* calcd for: C<sub>20</sub>H<sub>15</sub>O<sub>2</sub>IS, 445.9838 [M]<sup>+</sup>; found: 445.9840.

**(2-((4-bromophenyl)sulfonyl)ethene-1,1-diyl)dibenzene (3ah)**

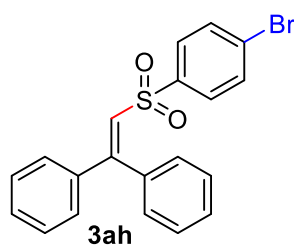

397.9977.

White solid; <sup>1</sup>H NMR (400 MHz, CDCl<sub>3</sub>): δ 7.45 (d, *J* = 8.5 Hz, 2H), 7.41-7.35 (m, 4H), 7.30 (td, *J* = 7.6, 2.2 Hz, 4H), 7.20 (d, *J* = 7.4 Hz, 2H), 7.06 (d, *J* = 7.4 Hz, 2H), 7.02 (s, 1H). <sup>13</sup>C NMR (100 MHz, CDCl<sub>3</sub>): δ 155.77, 140.45, 138.85, 135.39, 131.94, 130.61, 129.82, 129.27, 129.12, 128.86, 128.73, 128.53, 128.10, 128.00. **EI-MS** (*m/z*, %): 398 (M<sup>+</sup>, 17.76), 178 (100), 179 (42.98), 167 (31.61); **HRMS** (EI): *m/z* calcd for: C<sub>20</sub>H<sub>15</sub>O<sub>2</sub>SBr, 397.9976 [M]<sup>+</sup>; found: 397.9977.

**(2-((4-nitrophenyl)sulfonyl)ethene-1,1-diyl)dibenzene (3ai)**

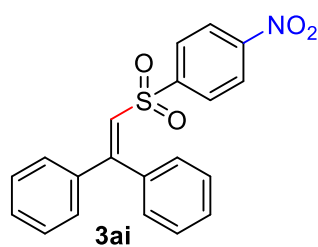

365.0722 [M]<sup>+</sup>; found: 365.0729.

White solid; <sup>1</sup>H NMR (400 MHz, CDCl<sub>3</sub>): δ 8.13 (d, *J* = 8.7 Hz, 2H), 7.68 (d, *J* = 8.7 Hz, 2H), 7.41 (dd, *J* = 12.7, 7.2 Hz, 2H), 7.36-7.25 (m, 4H), 7.22 (d, *J* = 7.7 Hz, 2H), 7.07 (s, 1H), 7.03 (d, *J* = 7.5 Hz, 2H). <sup>13</sup>C NMR (100 MHz, CDCl<sub>3</sub>): δ 157.21, 150.07, 147.04, 138.47, 135.18, 131.03, 129.90, 129.46, 129.08, 128.85, 128.38, 128.13, 127.77, 123.76. **EI-MS** (*m/z*, %): 365 (M<sup>+</sup>, 32.24), 178 (100), 179 (45.28), 167 (19.85); **HRMS** (EI): *m/z* calcd for: C<sub>20</sub>H<sub>15</sub>NO<sub>4</sub>S, 365.0722 [M]<sup>+</sup>; found: 365.0729.

**(2-((4-(trifluoromethyl)phenyl)sulfonyl)ethene-1,1-diyl)dibenzene (3aj)**

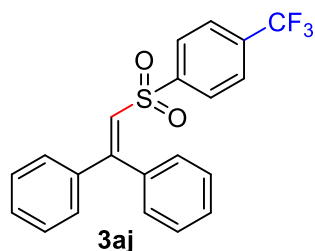

White solid; <sup>1</sup>H NMR (400 MHz, CDCl<sub>3</sub>): δ 7.65 (d, *J* = 8.2 Hz, 2H), 7.56 (d, *J* = 8.2 Hz, 2H), 7.44-7.18 (m, 8H), 7.06 (s, 1H), 7.02 (d, *J* = 7.3 Hz, 2H). <sup>13</sup>C NMR (100 MHz, CDCl<sub>3</sub>): δ 156.47, 144.83, 138.68, 135.31, 134.59, 134.27, 130.85, 129.87, 129.26, 128.82, 128.37, 128.33, 128.25, 128.09, 125.77 (q, *J* = 3.7 Hz). <sup>19</sup>F NMR (376 MHz,



CDCl<sub>3</sub>)  $\delta$  -63.25; **EI-MS** (m/z, %): 388 (M<sup>+</sup>, 5.4), 84 (100), 86 (69.93), 191 (28.22); **HRMS** (EI): m/z calcd for: C<sub>21</sub>H<sub>15</sub>F<sub>3</sub>O<sub>2</sub>S, 388.0745 [M]<sup>+</sup>; found: 388.0752.

**(2-((3-chlorophenyl)sulfonyl)ethene-1,1-diyl)dibenzene (3ak)**

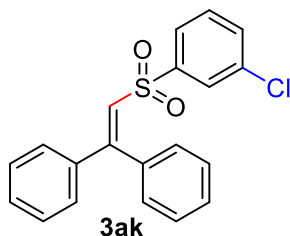

White solid; **<sup>1</sup>H NMR** (400 MHz, CDCl<sub>3</sub>):  $\delta$  7.49-7.37 (m, 5H), 7.31 (dd,  $J$  = 14.8, 7.8 Hz, 5H), 7.24-7.20 (m, 2H), 7.06 (s, 1H), 7.04 (s, 2H). **<sup>13</sup>C NMR** (100 MHz, CDCl<sub>3</sub>):  $\delta$  156.19, 143.17, 138.83, 135.20, 134.91, 133.07, 130.73, 130.05, 129.84, 129.35, 128.80, 128.53, 128.35, 128.17, 128.06, 125.87. **EI-MS** (m/z, %): 354 (M<sup>+</sup>, 32.79), 178 (100), 179 (48.67), 167 (31.3); **HRMS** (EI): m/z calcd for: C<sub>20</sub>H<sub>15</sub>O<sub>2</sub>SCl, 354.0481 [M]<sup>+</sup>; found: 354.0885.

**(2-(o-tolylsulfonyl)ethene-1,1-diyl)dibenzene (3al)**

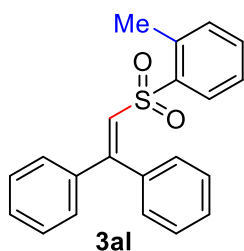

White solid; **<sup>1</sup>H NMR** (400 MHz, CDCl<sub>3</sub>):  $\delta$  7.45-7.36 (m, 2H), 7.31 (dd,  $J$  = 14.3, 7.4 Hz, 3H), 7.27-7.21 (m, 4H), 7.17 (t,  $J$  = 7.4 Hz, 3H), 7.06 (s, 1H), 7.03-6.96 (m, 3H), 2.65 (s, 3H). **<sup>13</sup>C NMR** (100 MHz, CDCl<sub>3</sub>):  $\delta$  153.96, 138.23, 136.23, 134.37, 131.89, 130.97, 129.47, 128.67, 128.50, 127.96, 127.87, 127.80, 127.31, 126.87, 125.01, 19.70. **EI-MS** (m/z, %): 334 (M<sup>+</sup>, 11.13), 178 (100), 57 (67.38), 191 (53.13); **HRMS** (EI): m/z calcd for: C<sub>21</sub>H<sub>18</sub>O<sub>2</sub>S, 334.1028 [M]<sup>+</sup>; found: 334.1037.

**(2-((2-chlorophenyl)sulfonyl)ethene-1,1-diyl)dibenzene (3am)**

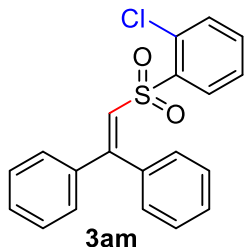

White solid; **<sup>1</sup>H NMR** (400 MHz, CDCl<sub>3</sub>):  $\delta$  7.44 (dd,  $J$  = 8.0, 1.3 Hz, 1H), 7.41-7.31 (m, 5H), 7.29-7.20 (m, 3H), 7.18 (s, 1H), 7.13 (t,  $J$  = 7.6 Hz, 2H), 7.05 (td,  $J$  = 8.1, 1.4 Hz, 1H), 6.99 (d,  $J$  = 7.1 Hz, 2H). **<sup>13</sup>C NMR** (100 MHz, CDCl<sub>3</sub>):  $\delta$  155.41, 139.13, 135.33, 133.75, 132.21, 131.18, 130.97, 130.55, 129.60, 128.96, 128.77, 128.46, 128.24, 127.79, 126.74. **EI-MS** (m/z, %): 354 (M<sup>+</sup>, 29.38), 178 (100), 167 (43.14), 179 (42.59); **HRMS** (EI): m/z calcd for: C<sub>20</sub>H<sub>15</sub>O<sub>2</sub>SCl, 354.0481 [M]<sup>+</sup>; found: 354.0488.

**(2-(mesitylsulfonyl)ethene-1,1-diyl)dibenzene (3an)**

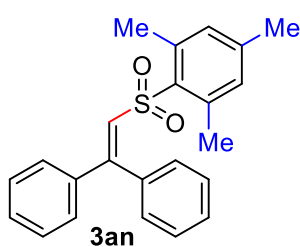

White solid; **<sup>1</sup>H NMR** (400 MHz, CDCl<sub>3</sub>):  $\delta$  7.40-7.24 (m, 4H), 7.24-7.16 (m, 4H), 7.06 (s, 1H), 6.98 (d,  $J$  = 7.2 Hz, 2H), 6.75 (m, 2H), 2.44 (s, 6H), 2.24 (s, 3H). **<sup>13</sup>C NMR** (100 MHz, CDCl<sub>3</sub>):  $\delta$  153.19, 142.60, 139.45, 139.25, 135.58, 135.51, 131.77, 131.28, 130.20, 129.21, 128.74, 128.61, 128.09, 127.89, 22.60, 21.03. **EI-MS** (m/z, %): 362 (M<sup>+</sup>, 4.33), 178 (100), 297 (89.71), 165 (61.43); **HRMS** (EI): m/z calcd for: C<sub>23</sub>H<sub>22</sub>O<sub>2</sub>S, 362.1341 [M]<sup>+</sup>; found: 364.1343.

### 2-((2,4,6-triisopropylphenyl)sulfonyl)ethene-1,1-diyl)dibenzene (**3ao**)

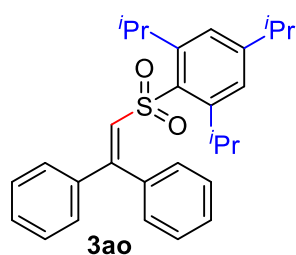

White solid;  $^1\text{H NMR}$  (400 MHz,  $\text{CDCl}_3$ ):  $\delta$  7.31-7.15 (m, 4H), 7.14-7.07 (m, 4H), 7.04 (s, 1H), 6.96 (d,  $J = 7.3$  Hz, 2H), 6.91 (s, 2H), 3.93 (dt,  $J = 13.4, 6.7$  Hz, 2H), 2.77 (dt,  $J = 13.8, 6.9$  Hz, 1H), 1.15 (d,  $J = 6.9$  Hz, 6H), 1.10 (d,  $J = 6.7$  Hz, 12H).  $^{13}\text{C NMR}$  (100 MHz,  $\text{CDCl}_3$ ):  $\delta$  153.21, 150.37, 139.61, 132.86, 130.04, 129.60, 128.72, 128.58, 128.09, 127.85, 123.26, 123.26, 34.41, 29.88, 24.93, 23.78. **EI-MS** ( $m/z$ , %): 446 ( $\text{M}^+$ , 1.55), 180 (100), 191 (72.5), 57 (29.85); **HRMS** (EI):  $m/z$  calcd for:  $\text{C}_{29}\text{H}_{34}\text{O}_2\text{S}$ , 446.2280 [ $\text{M}$ ] $^+$ ; found: 446.2284.

### 2-((2,2-diphenylvinyl)sulfonyl)naphthalene (**3ap**)

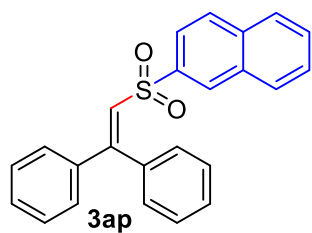

White solid;  $^1\text{H NMR}$  (400 MHz,  $\text{CDCl}_3$ ):  $\delta$  7.97 (s, 1H), 7.90-7.80 (m, 2H), 7.76 (d,  $J = 7.9$  Hz, 1H), 7.60 (ddd,  $J = 31.2, 15.8, 7.8$  Hz, 3H), 7.39-7.32 (m, 1H), 7.28 (t,  $J = 7.3$  Hz, 3H), 7.18 (dd,  $J = 13.4, 7.1$  Hz, 4H), 7.10 (s, 1H), 7.03 (d,  $J = 7.3$  Hz, 2H).  $^{13}\text{C NMR}$  (100 MHz,  $\text{CDCl}_3$ ):  $\delta$  155.46, 139.08, 138.04, 135.34, 134.91, 131.97, 130.46, 129.81, 129.74, 129.45, 129.10, 129.07, 129.03, 128.84, 128.68, 128.29, 127.87, 127.82, 127.39, 122.61. **EI-MS** ( $m/z$ , %): 370 ( $\text{M}^+$ , 1.98), 84 (100), 86 (79.14), 47 (26.24); **HRMS** (EI):  $m/z$  calcd for:  $\text{C}_{24}\text{H}_{18}\text{O}_2\text{S}$ , 370.1028 [ $\text{M}$ ] $^+$ ; found: 370.1034.

## 3. Gram-Scale Synthesis

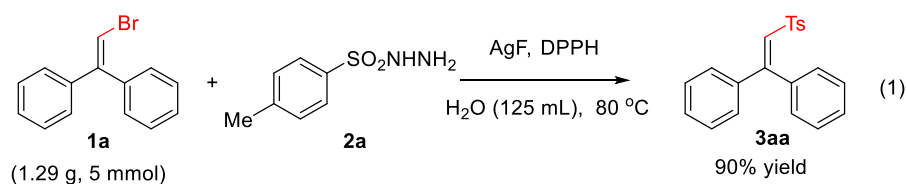

To a 250 mL Schlenk tube charged with a stir bar, 2,2-diphenylethenyl bromide (**1a**) (5 mmol), 4-methylbenzenesulfonylhydrazide (**2a**) (7.5 mmol), AgF (1.27 g, 10 mmol), and DPPH (340 mg, 0.75 mmol) were added. After stirred at 80 °C for 10 h, the reaction mixture was cooled down to room temperature, washed with brine (15 mL) and extracted with EtOAc (3×10 mL). The combined organic phases were dried over anhydrous  $\text{Na}_2\text{SO}_4$ , filtered, and concentrated under reduced pressure. The residue was purified by silica gel chromatography (PE/EA = 5:1) to afford pure products **3aa** in 90% yield.

#### 4. Control Experiments

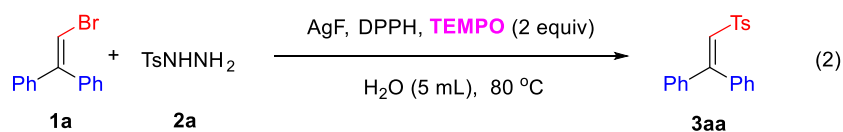

To a 25 mL Schlenk tube charged with a stir bar, 2,2-diphenylethenyl bromide (**1a**) (0.2 mmol), 4-methylbenzenesulfonylhydrazide (**2a**) (0.3 mmol), AgF (50.8 mg, 0.4 mmol), DPPH (13.6 mg, 0.03 mmol) and TEMPO (62.4 mg, 2 equiv) were added. After filled with argon, water (5 mL) was added via a syringe. The mixture was stirred at 80 °C for 10 h. Upon completion, the yield of the product was detected by <sup>1</sup>H NMR with CH<sub>2</sub>Br<sub>2</sub> as the internal standard.

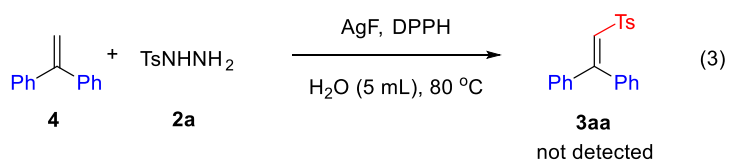

To a 25 mL Schlenk tube charged with a stir bar, 1,1-diphenylethene (**1a**) (0.2 mmol), 4-methylbenzenesulfonylhydrazide (**2a**) (0.3 mmol), AgF (50.8 mg, 0.4 mmol), DPPH (13.6 mg, 0.03 mmol) were added. After filled with argon, water (5 mL) was added via a syringe. The mixture was stirred at 80 °C for 10 h. Upon completion, the yield of the product was detected by <sup>1</sup>H NMR with CH<sub>2</sub>Br<sub>2</sub> as the internal standard.

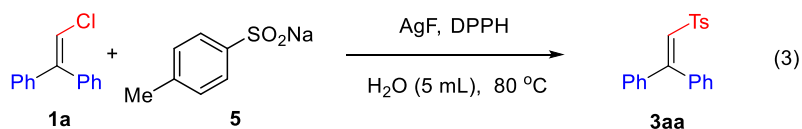

To a 25 mL Schlenk tube charged with a stir bar, 2,2-diphenylethenyl bromide (**1a**) (0.2 mmol), sodium *p*-tolylsulfinate (**5**) (0.3 mmol), AgF (50.8 mg, 0.4 mmol), DPPH (13.6 mg, 0.03 mmol) were added. After filled with argon, water (5 mL) was added via a syringe. The mixture was stirred at 80 °C for 10 h. Upon completion, the yield of the product was detected by <sup>1</sup>H NMR with CH<sub>2</sub>Br<sub>2</sub> as the internal standard.

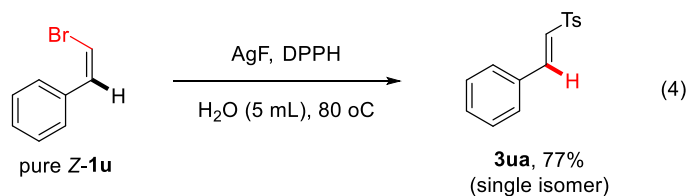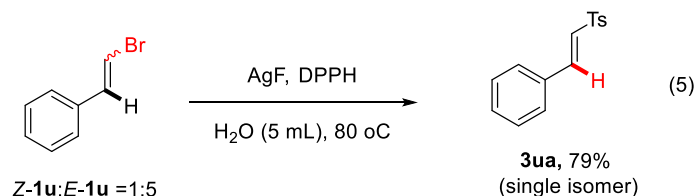

To a 25 mL Schlenk tube charged with a stir bar, *Z*-β-bromostyrene (**Z-1u**) or β-bromostyrene (**Z-1u**:**E-1u** = 1:5) (0.2 mmol), 4-methylbenzenesulfonohydrazide (**2a**) (0.3 mmol), AgF (50.8 mg, 0.4 mmol), DPPH (13.6 mg, 0.03 mmol) were added. After filled with argon, water (5 mL) was added via a syringe. The mixture was stirred at 80 °C for 10 h. Upon completion, the reaction mixture was washed with brine (15 mL) and extracted with EtOAc (3×10 mL). The combined organic phases were dried over anhydrous Na<sub>2</sub>SO<sub>4</sub>, filtered, and concentrated under reduced pressure. The residue was purified by silica gel chromatography (PE/EA = 5:1) to afford pure products (**3ua**).

## 5. References

- [1] G. Zhang, R. X. Bai, C. H. Li, C. G. Feng, G. Q. Lin, *Tetrahedron* 2019, **75**, 1658.
- [2] J. J. Molloy, J. B. Metternich, C. G. Daniliuc, A. J. B. Watson, R. Gilmour, *Angew. Chem. Int. Ed.* 2018, **57**, 3168.
- [3] G. L. Backes, D. M. Neumann, B. S. Jursic, *Bioorg. Med. Chem.* 2014, **22**, 4629.
- [4] L. Y. Fu, T. M. Xian, K. T. Shi, *Chem. Eur. J.* 2012, **18**, 1582.
- [5] B. Wang, Z. C. Yan, Y. Y. Liu, J. W. Wang, Z. G. Zha, Z. Y. Wang, *Green Chem.* 2019, **21**, 205.
- [6] X. Zhao, L. P. Zhang, T. J. Li, G. Y. Liu, H. M. Wang, K. Lu, *Chem. Commun.* 2014, **50**, 13121.
- [7] A. O. Terent'ev, O. M. Mulina, D. A. Pirgach, A. I. Ilovaisky, M. A. Syroeshkin, N. I. Kapustina, G. I. Nikishin, *Tetrahedron* 2017, **73**, 6871.
- [8] K. Kiyokawa, T. Nagata, J. Hayakawa, S. Minakata, *Chem. Eur. J.* 2014, **20**, 1.

# 6. Copies of $^1\text{H}$ NMR, $^{13}\text{C}$ NMR and $^{19}\text{F}$ NMR

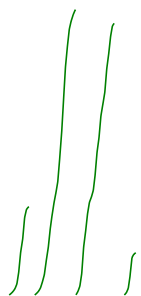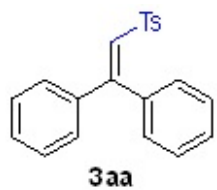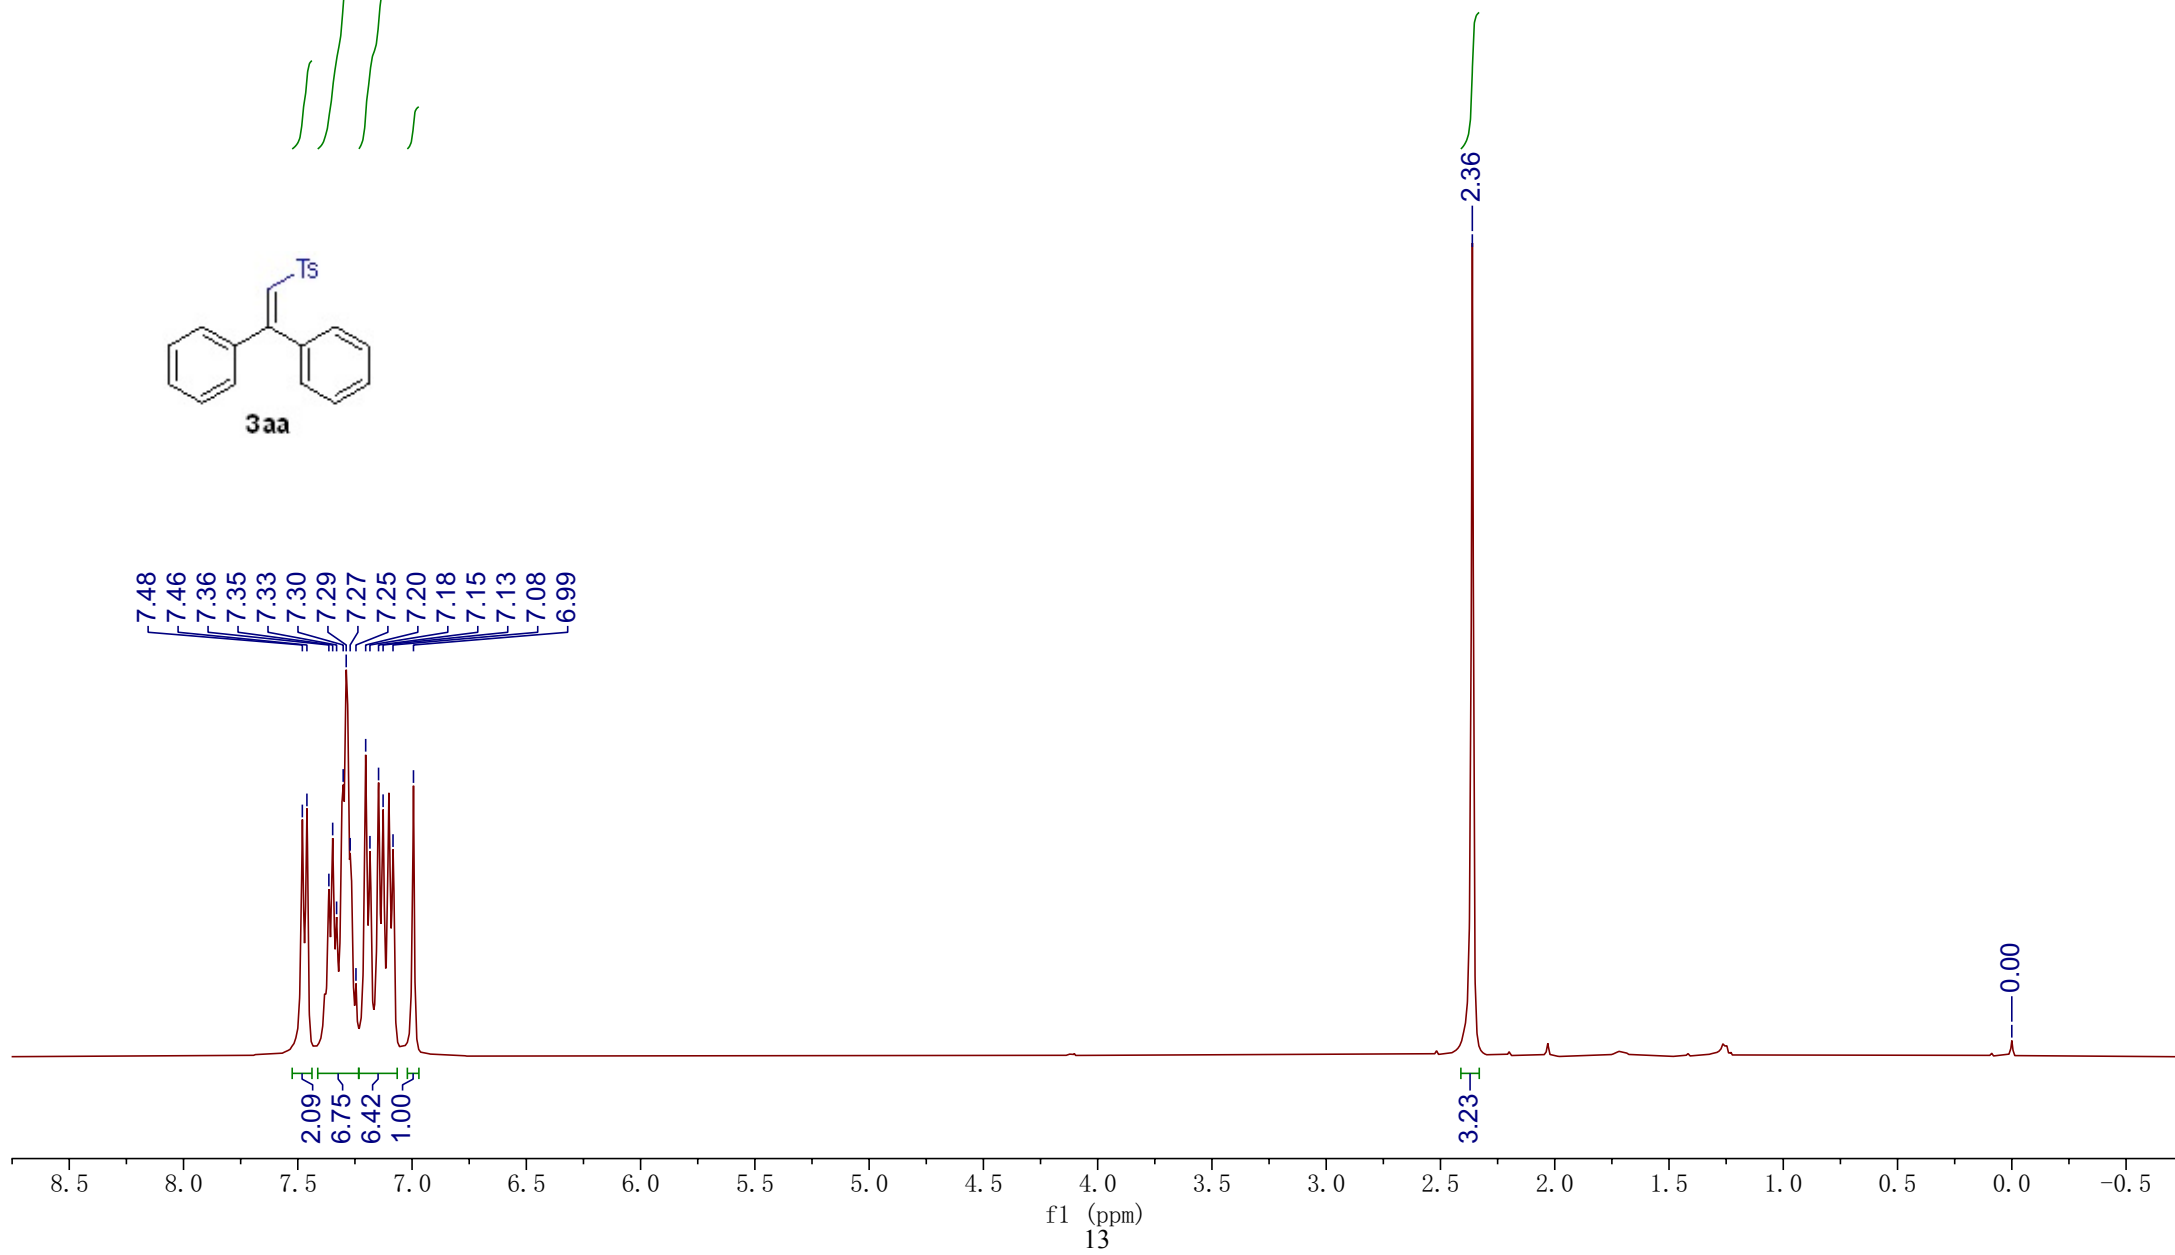

7.48  
7.46  
7.36  
7.35  
7.33  
7.30  
7.29  
7.27  
7.25  
7.20  
7.18  
7.15  
7.13  
7.08  
6.99

2.09  
6.75  
6.42  
1.00

f1 (ppm)  
13

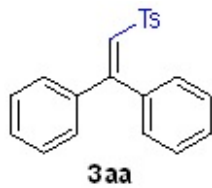

—154.81

~143.86

~139.32

~138.69

~135.67

~130.34

~129.87

~129.44

~129.06

~128.94

~128.67

~128.31

~127.91

~127.79

~77.48

~77.16

~76.84

—21.68

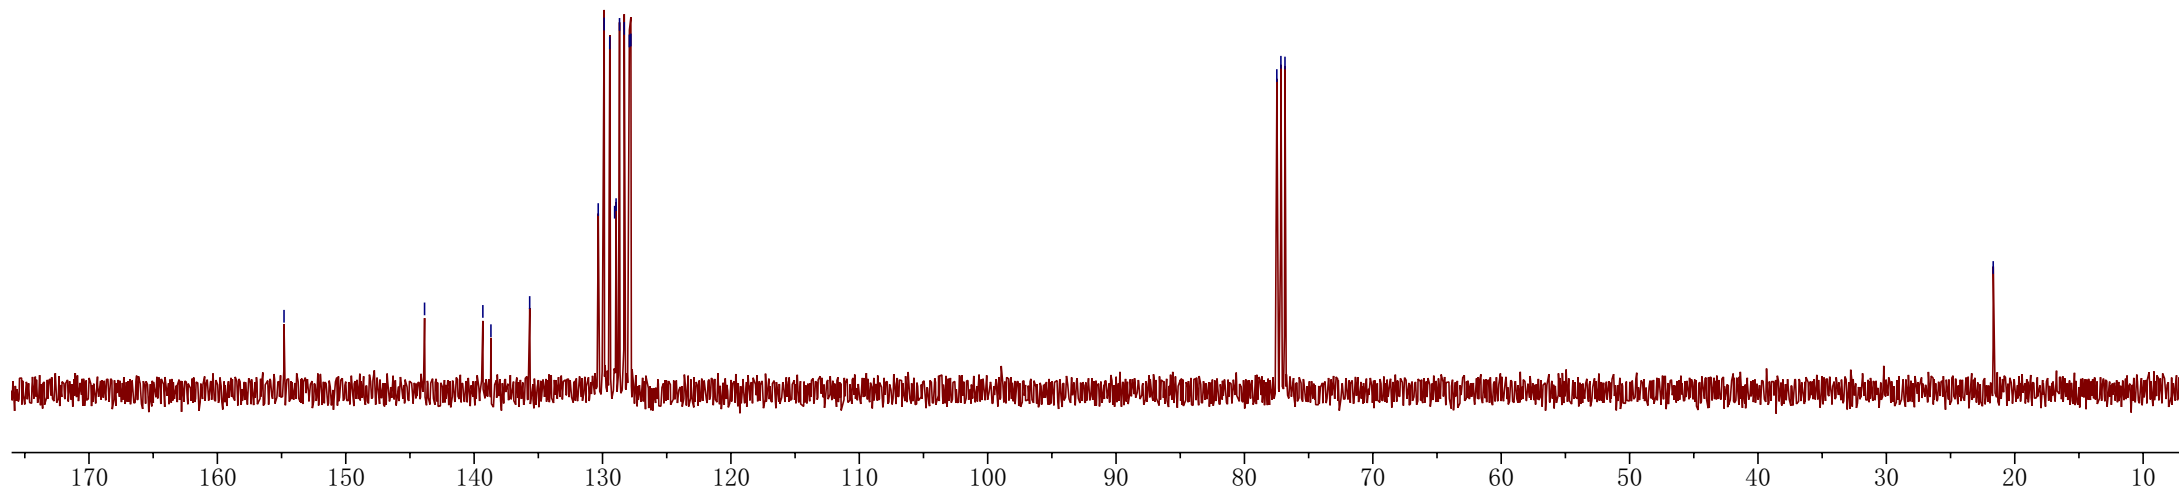

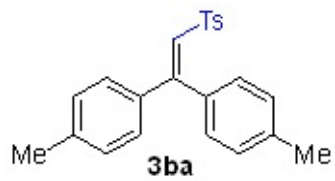

7.51  
7.49  
7.16  
7.14  
7.11  
7.09  
7.00  
6.98  
6.90

2.39  
2.38  
2.33

— 0.00

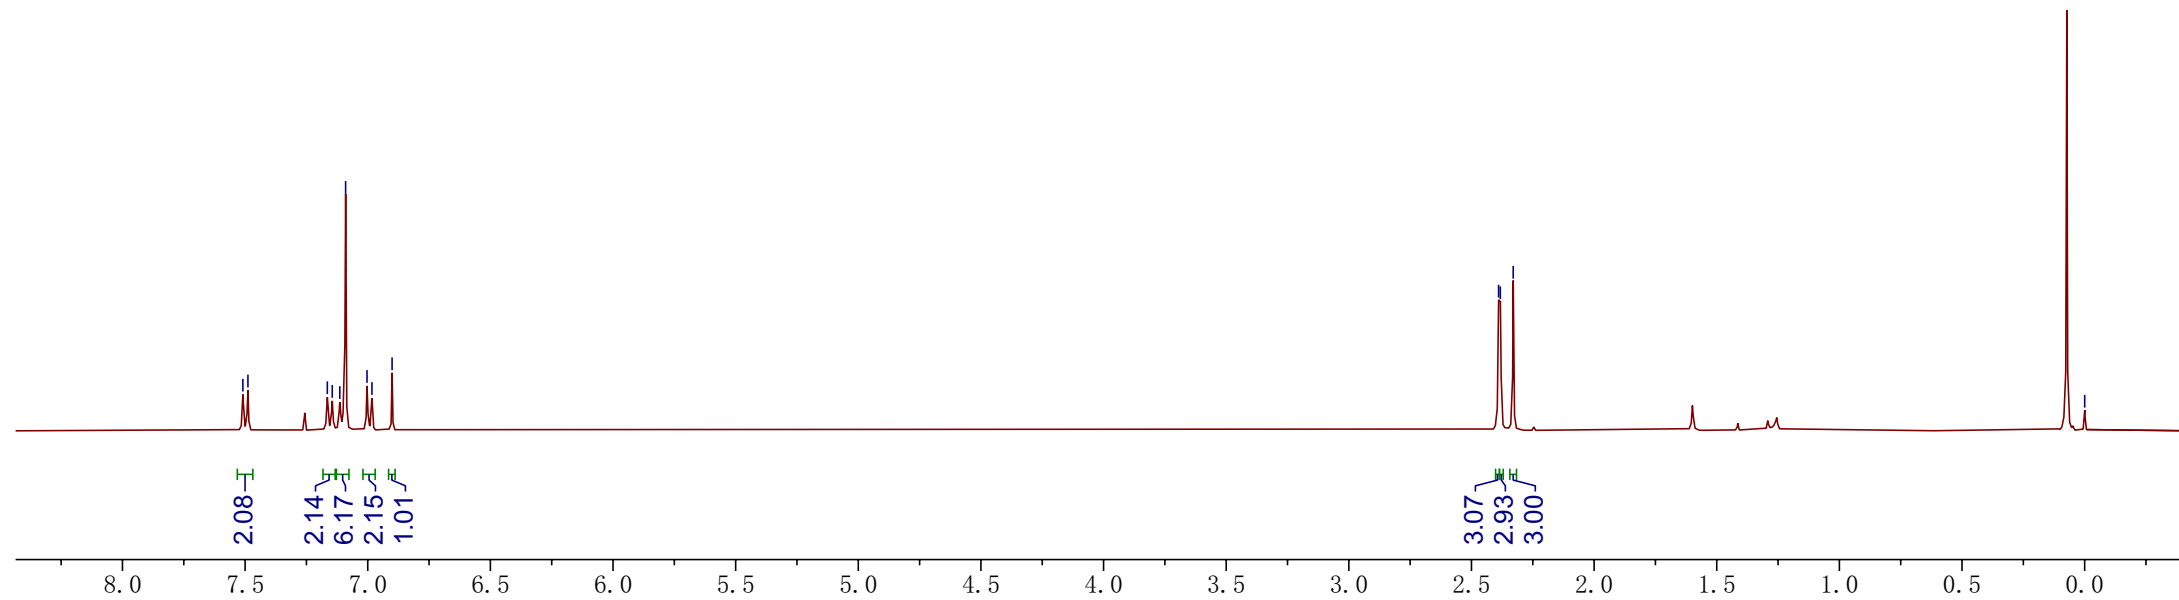

f1 (ppm)  
15

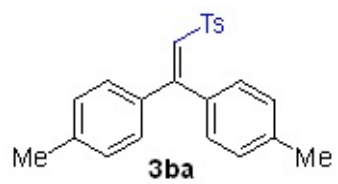

154.99  
143.72  
140.71  
139.03  
138.94  
136.80  
132.99  
129.91  
129.35  
128.55  
128.37  
127.80  
127.66

77.48  
77.16  
76.84

21.69  
21.56  
21.39

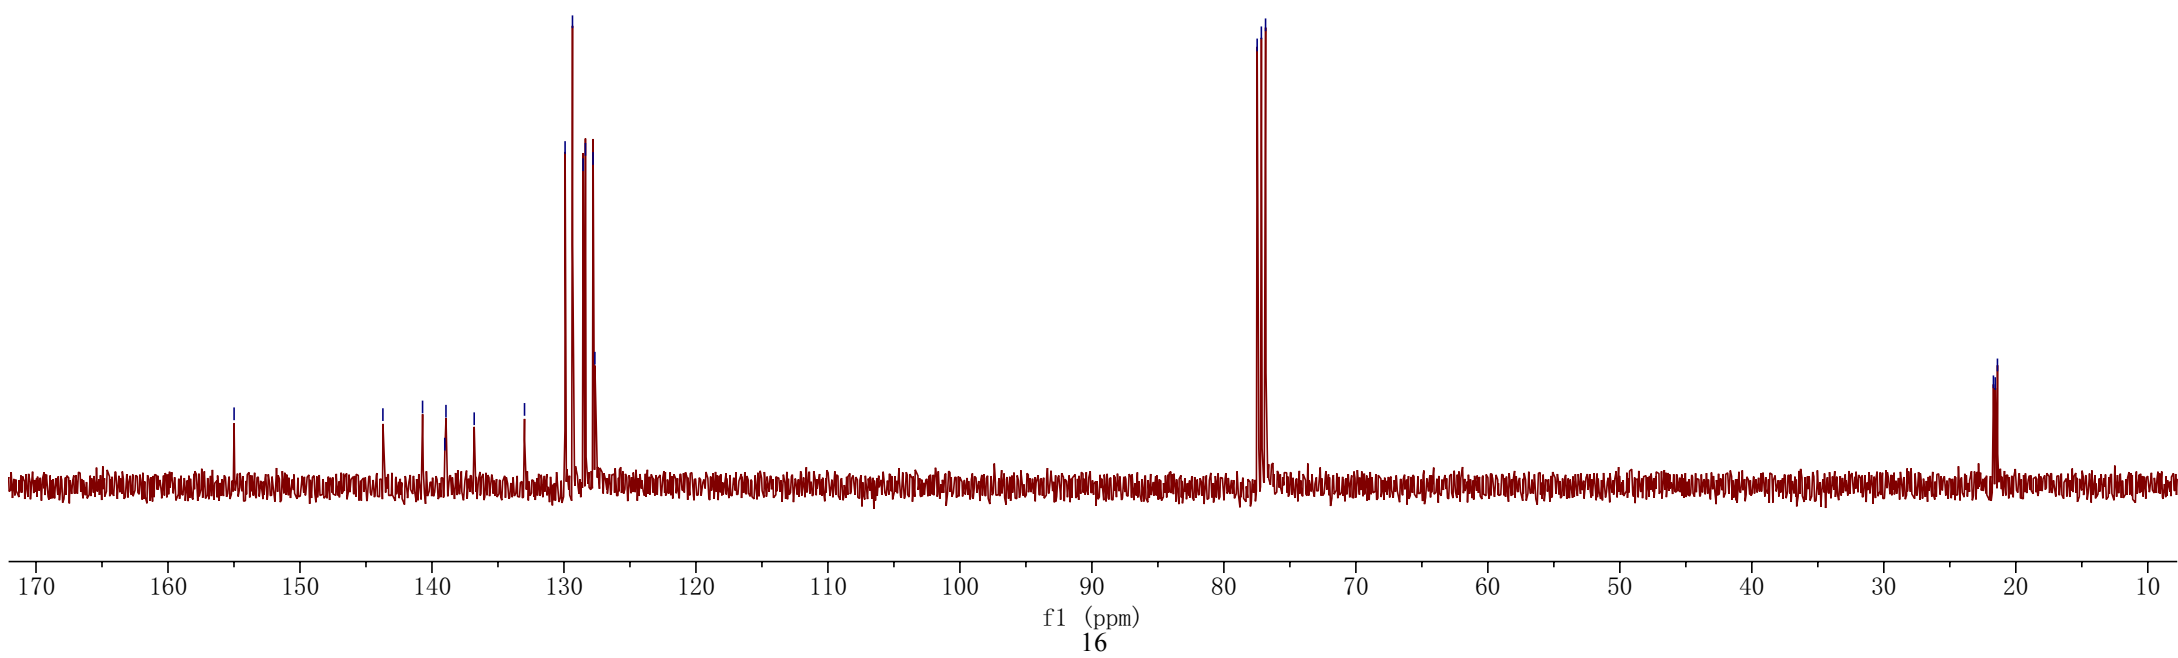



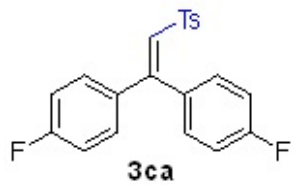

7.51  
7.49  
7.21  
7.19  
7.19  
7.18  
7.17  
7.16  
7.16  
7.12  
7.10  
7.09  
7.09  
7.08  
7.03  
7.02  
7.02  
7.01  
7.01  
7.00  
6.99  
6.98  
6.98  
6.93

2.39

0.00

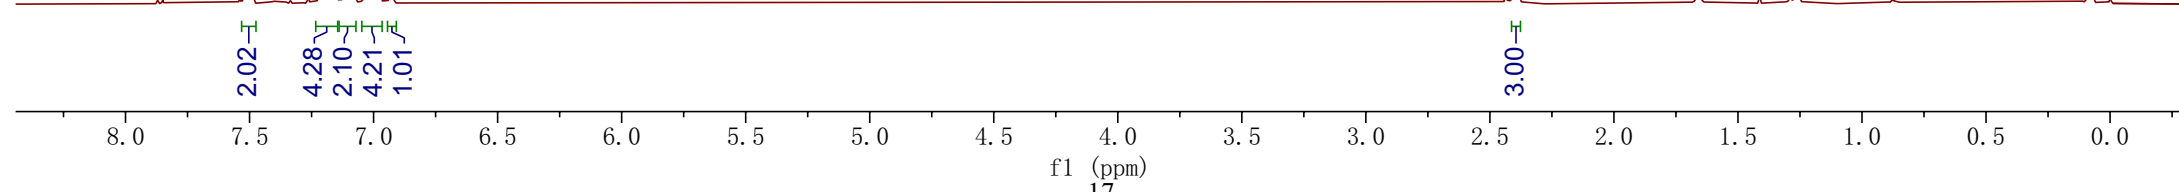

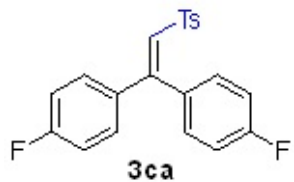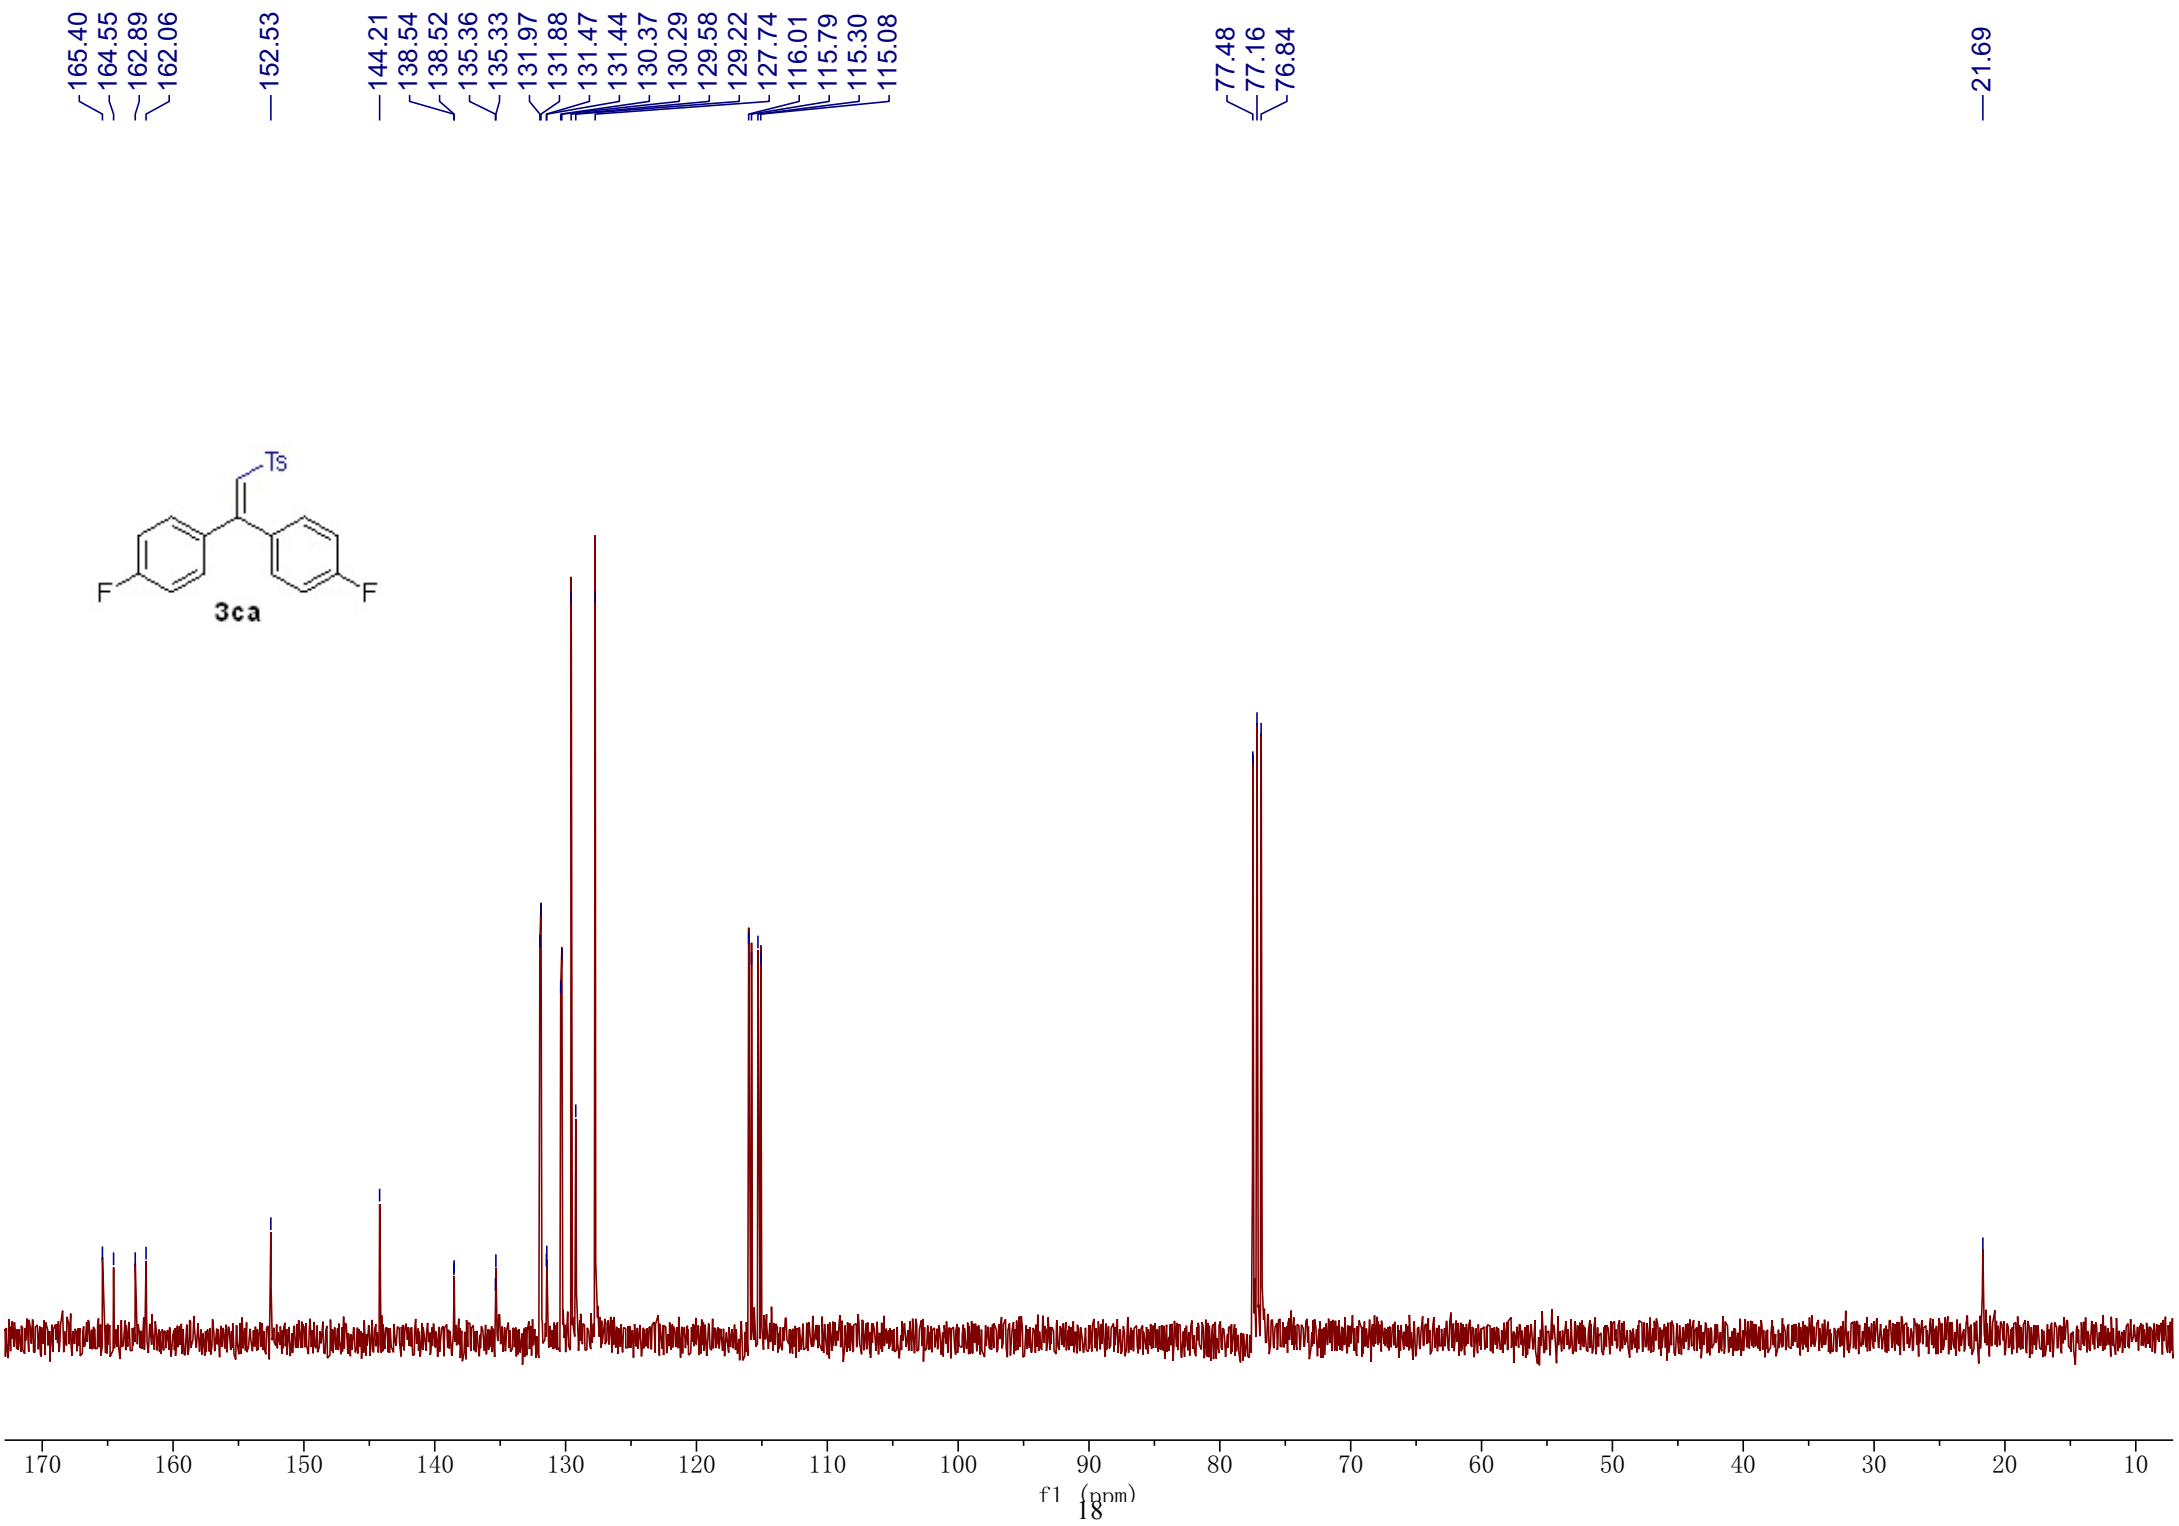

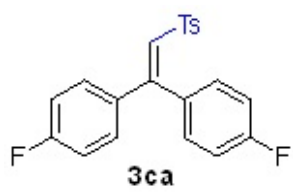

---109.76  
---111.61

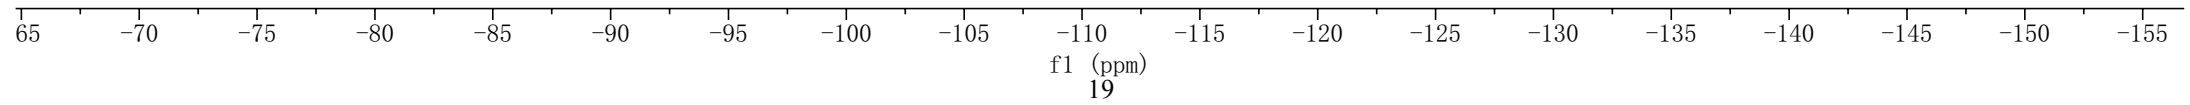

7.52  
7.50  
7.31  
7.29  
7.29  
7.29  
7.26  
7.22  
7.20  
7.12  
7.10  
7.06  
7.04  
6.95

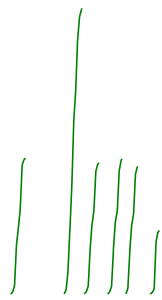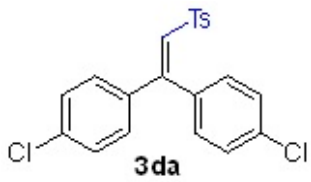

—2.41

—0.00

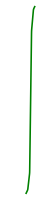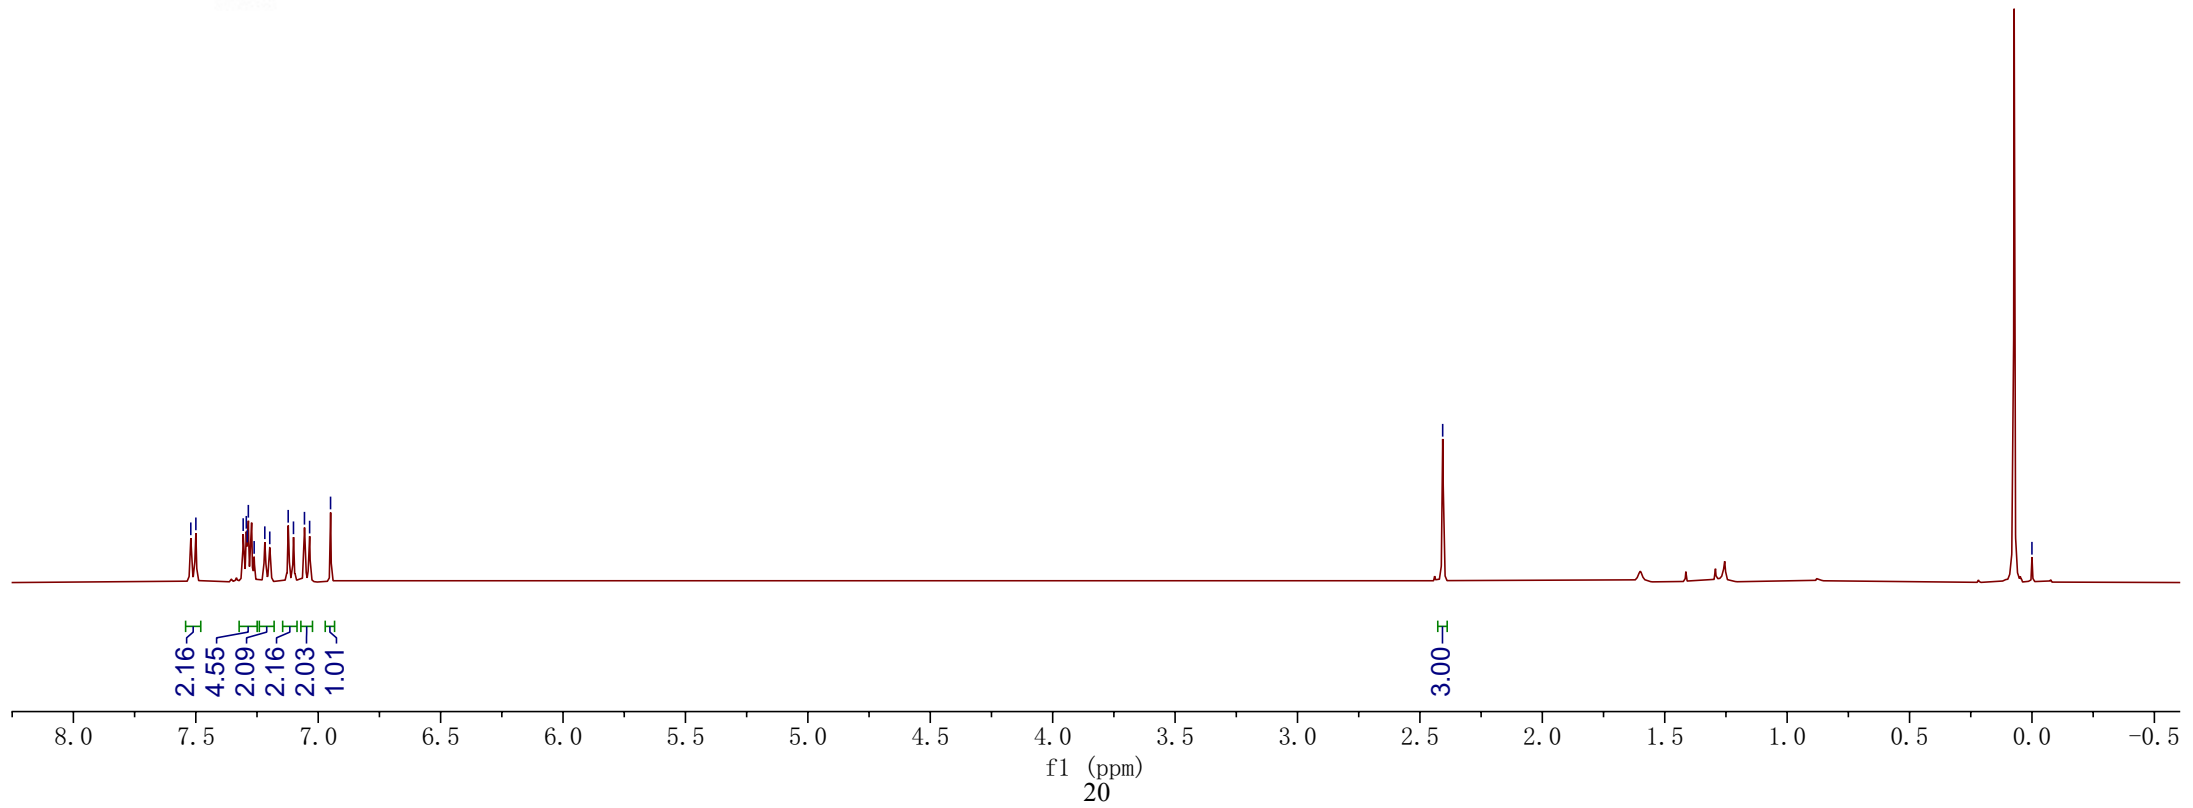

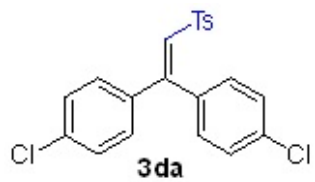

152.01  
144.41  
139.18  
137.37  
136.88  
135.54  
133.73  
131.27  
129.84  
129.66  
129.55  
129.10  
128.41  
127.85

77.48  
77.16  
76.84

131.27  
129.84  
129.66  
129.55  
129.10  
128.41  
127.85

21.76

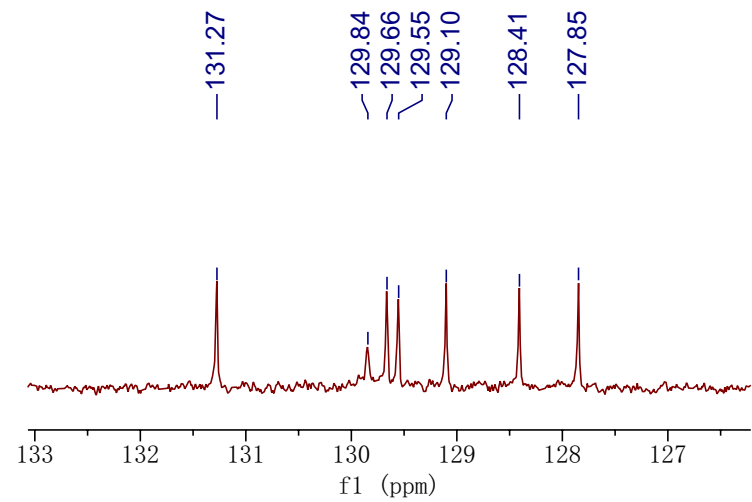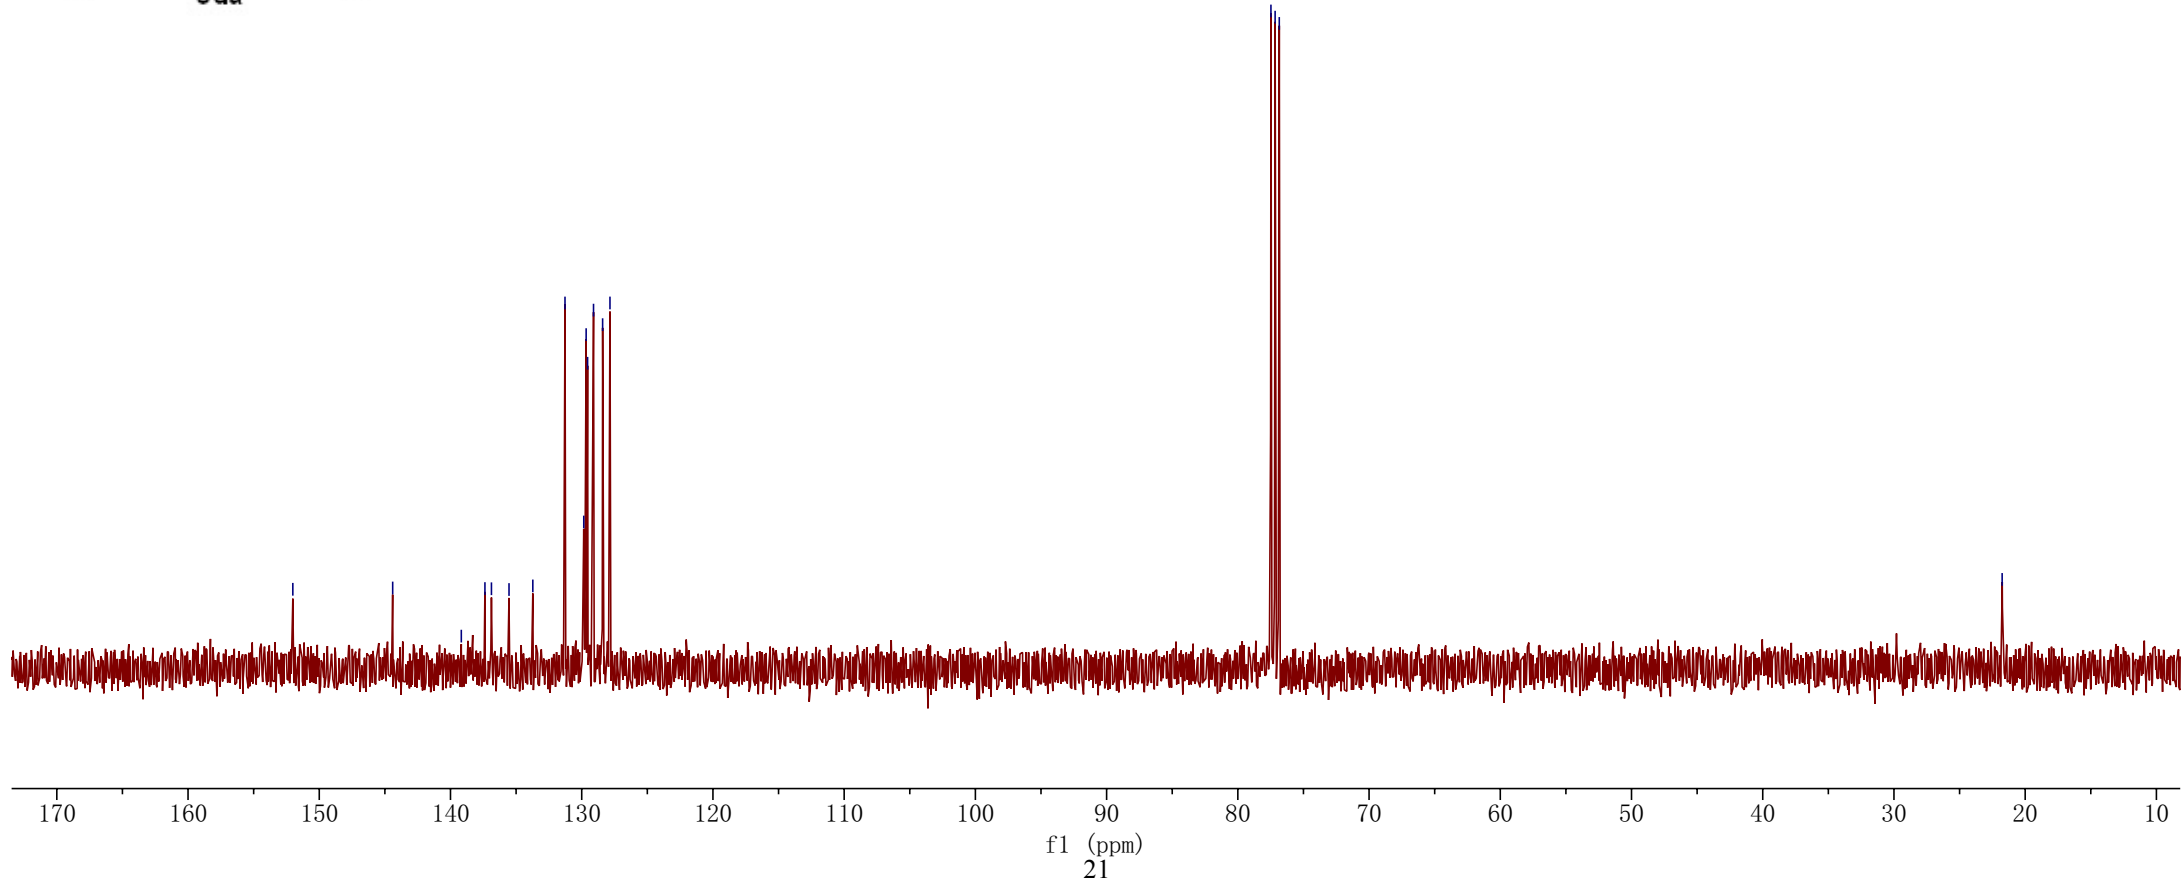

7.46  
7.44  
7.38  
7.36  
7.30  
7.28  
7.27  
7.23  
7.21  
7.21  
7.18  
7.13  
7.10  
7.08  
7.08  
7.07  
7.06  
7.06  
7.05  
7.05  
7.04  
7.01  
7.00  
6.99  
6.98  
6.86  
6.81  
6.76  
6.74  
6.71

3.77  
3.71

2.30  
2.29

0.08

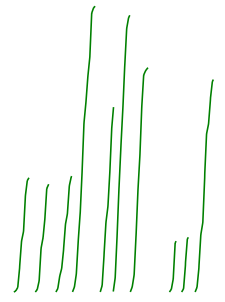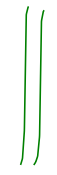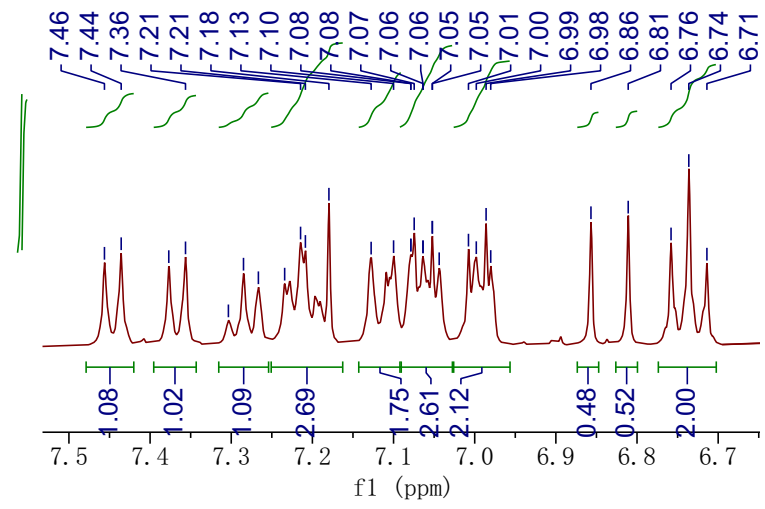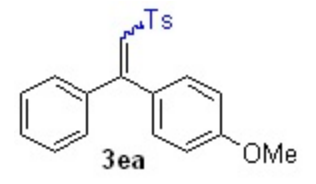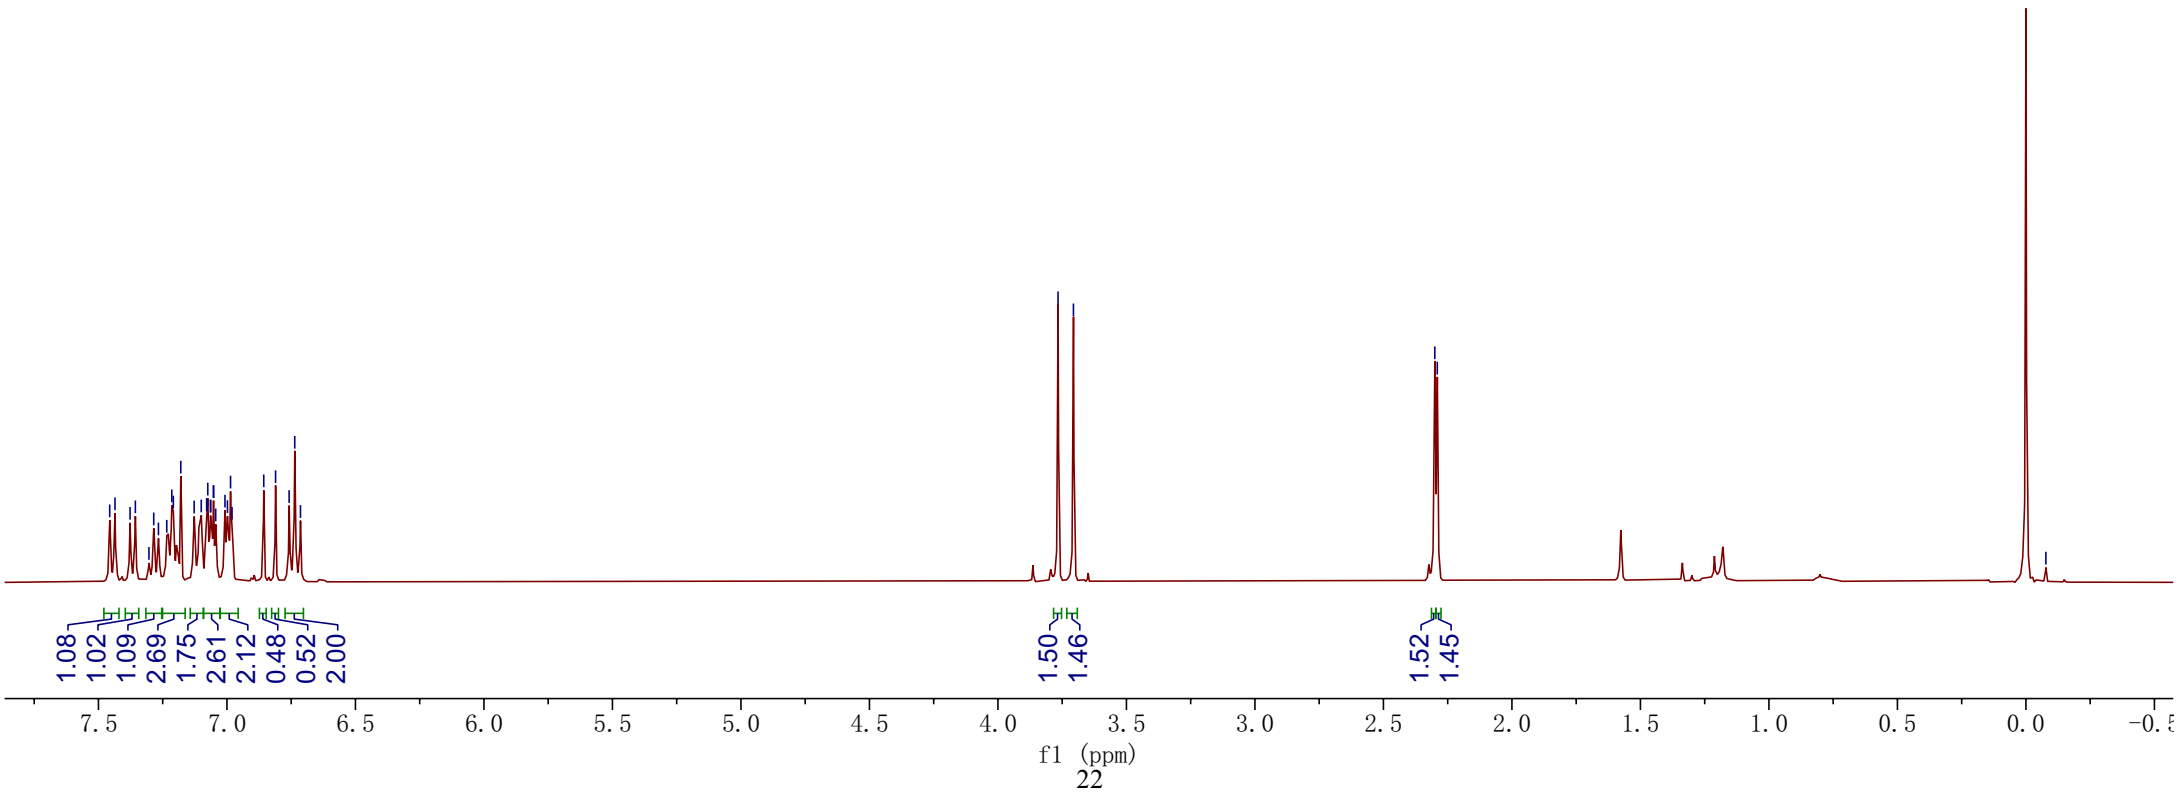

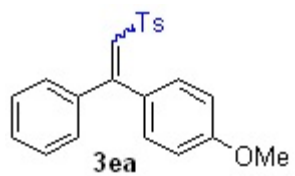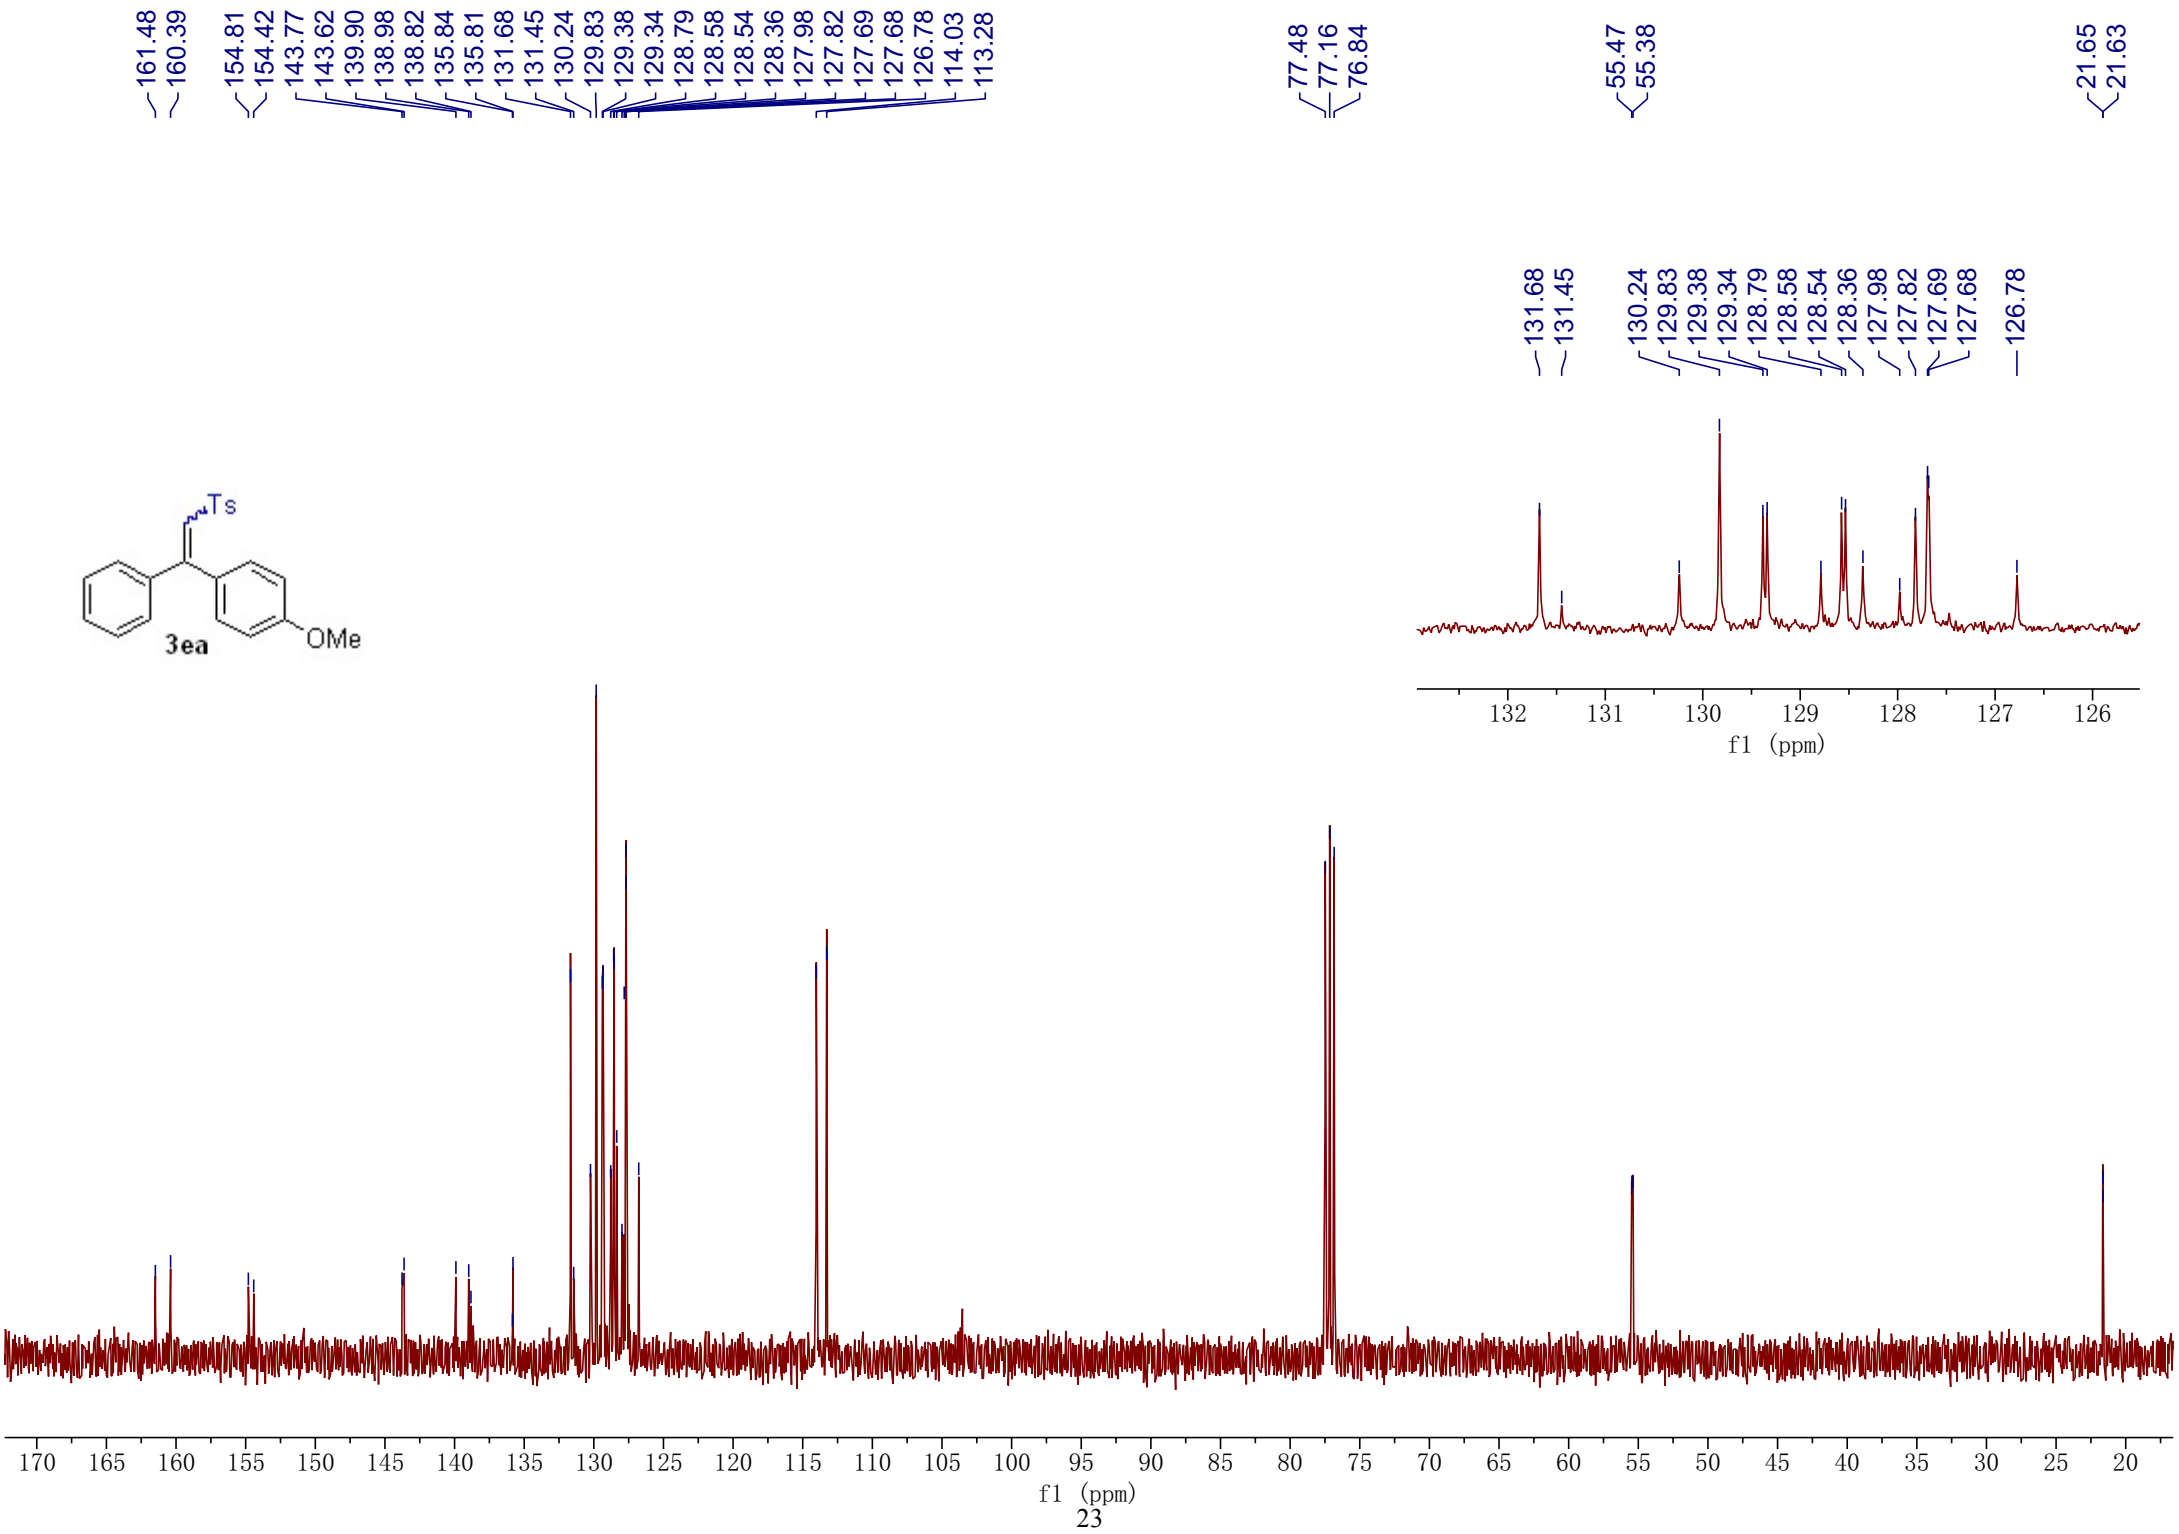

7.53  
7.51  
7.47  
7.45  
7.38  
7.37  
7.36  
7.35  
7.32  
7.30  
7.29  
7.28  
7.27  
7.25  
7.21  
7.19  
7.16  
7.14  
7.12  
7.09  
7.07  
6.98  
6.97

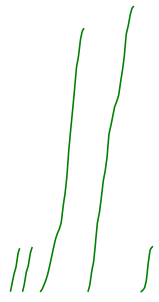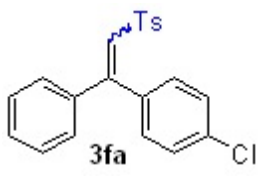

2.39  
2.37  
0.08  
0.00

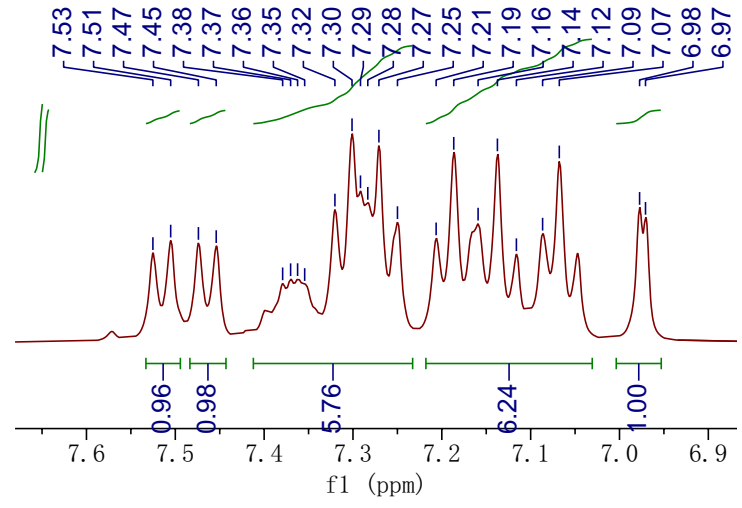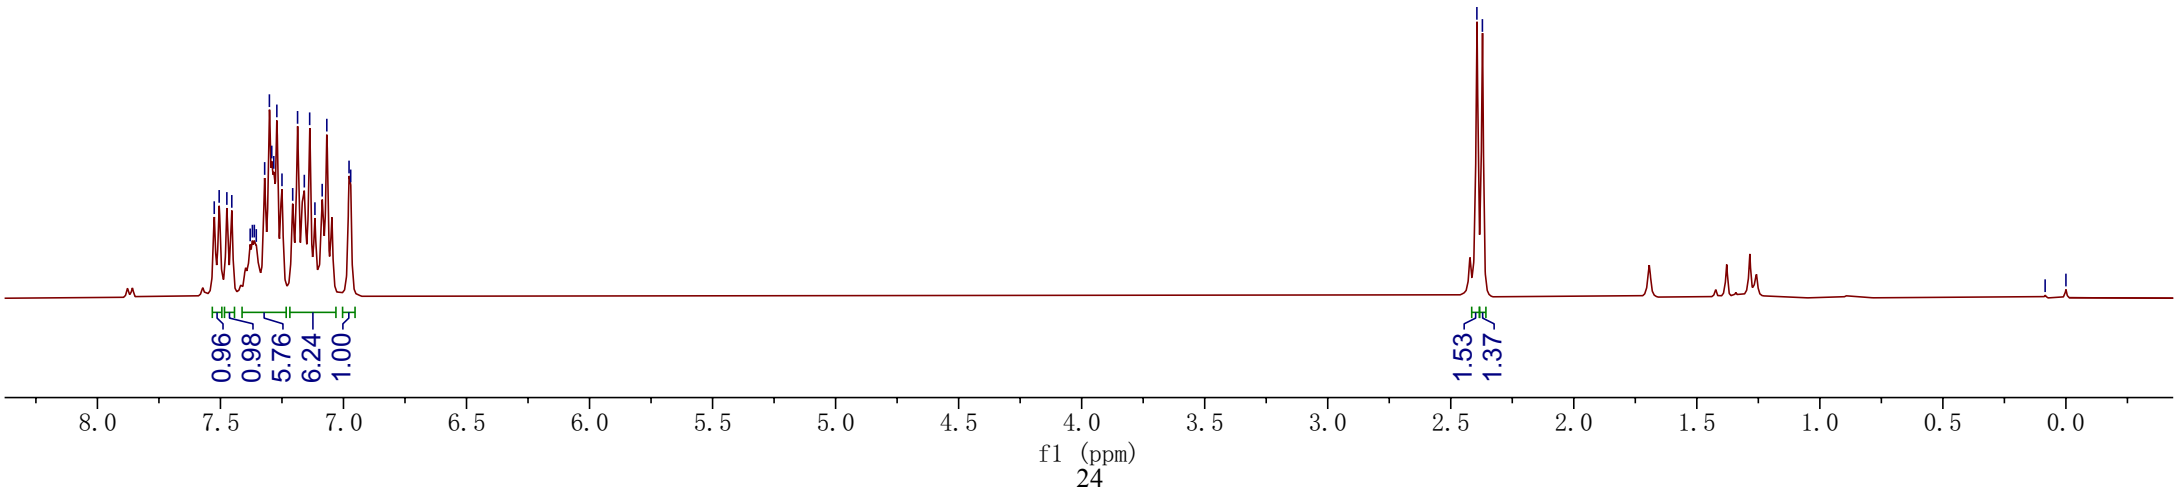



153.41  
153.29  
144.20  
144.00  
138.80  
138.45  
138.39  
137.73  
136.52  
135.20  
135.17  
134.10  
131.26  
130.53  
129.79  
129.77  
129.54  
129.46  
129.37  
129.35  
129.13  
128.89  
128.76  
128.24  
128.17  
128.01  
127.77  
127.72

77.48  
77.16  
76.84

21.68  
21.65

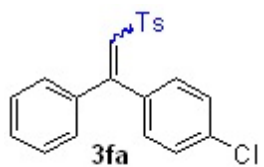

131.26  
130.53  
129.79  
129.77  
129.54  
129.46  
129.37  
129.35  
129.13  
128.89  
128.76  
128.24  
128.17  
128.01  
127.77  
127.72

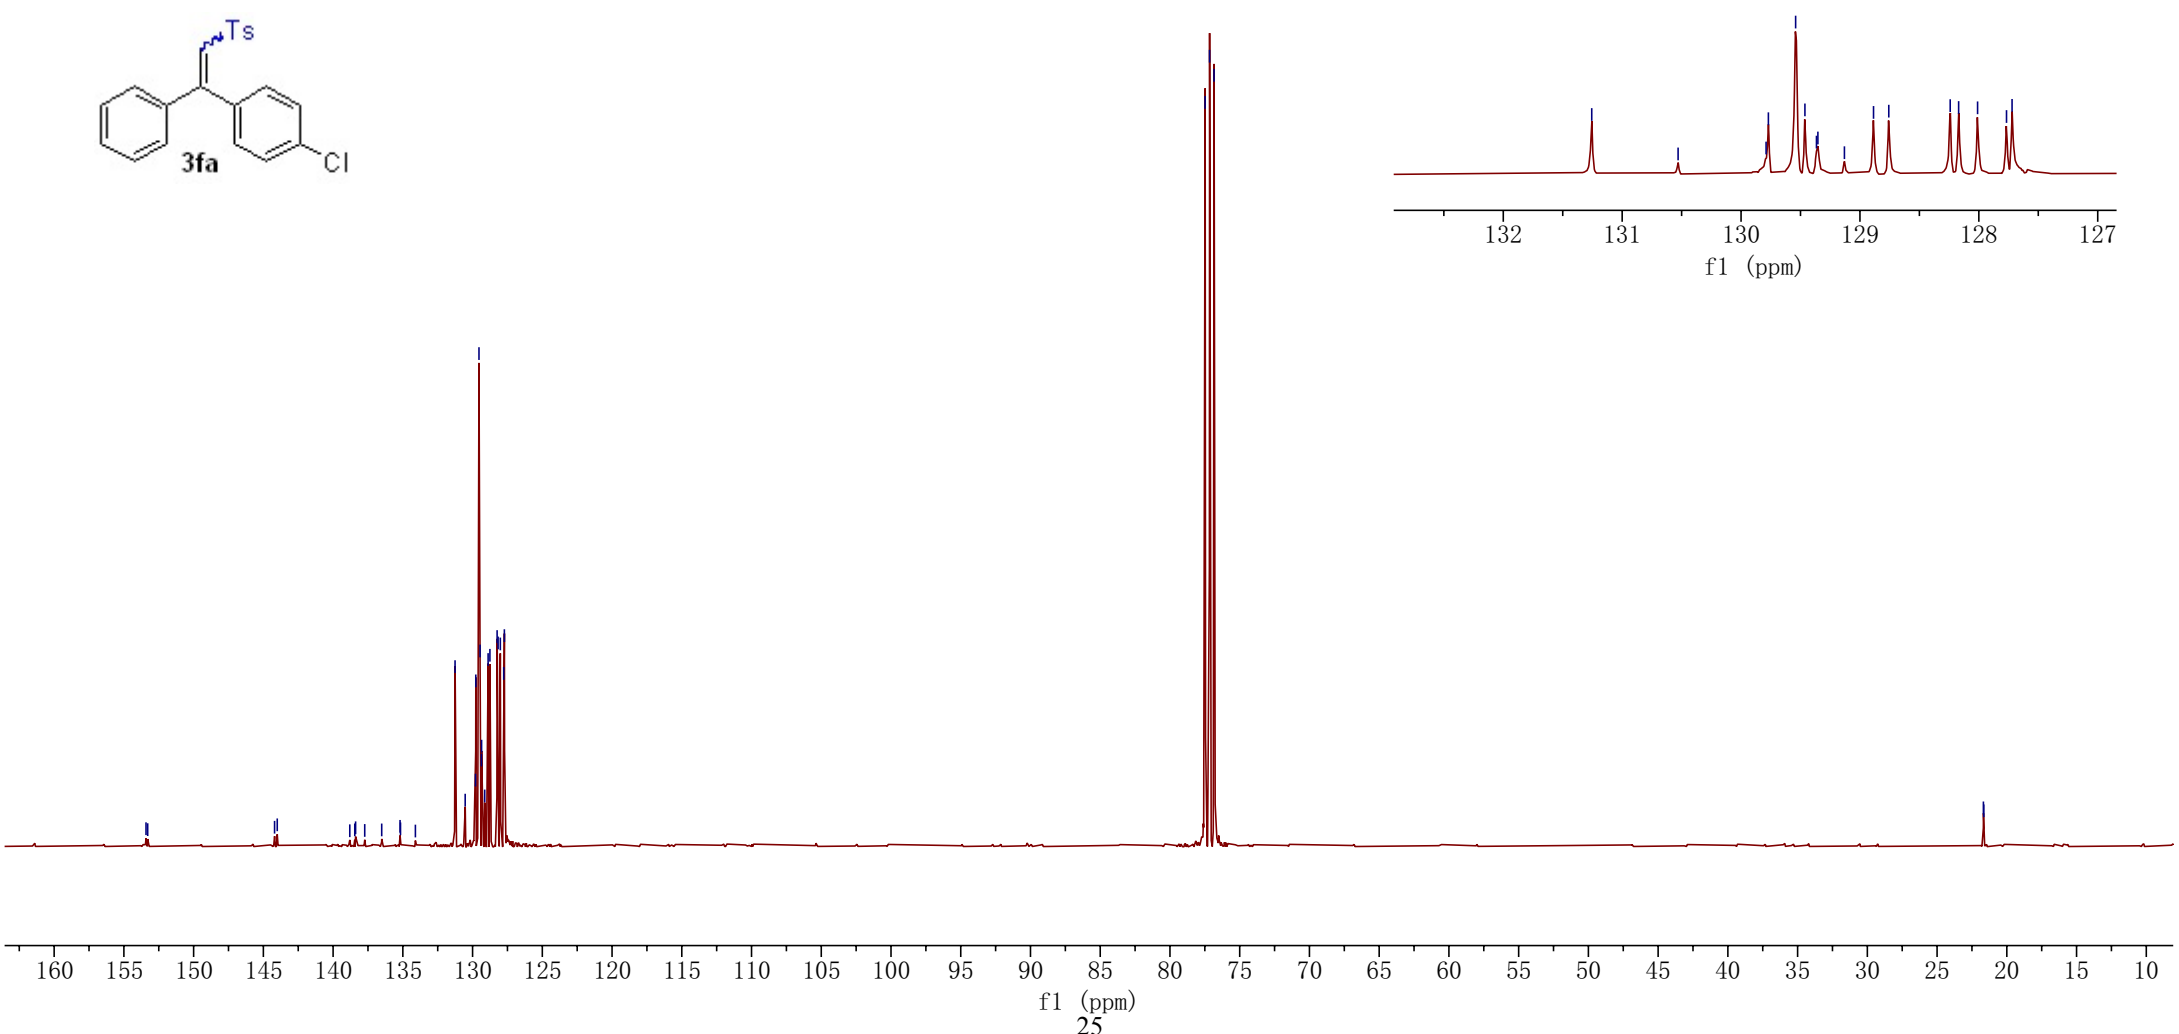

7.56  
7.54  
7.49  
7.46  
7.44  
7.42  
7.40  
7.36  
7.34  
7.32  
7.30  
7.29  
7.27  
7.25  
7.23  
7.22  
7.20  
7.17  
7.09  
7.07  
7.05  
6.98  
6.94

2.31  
2.30

0.00

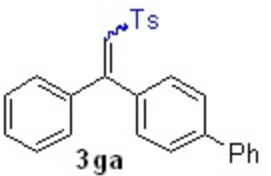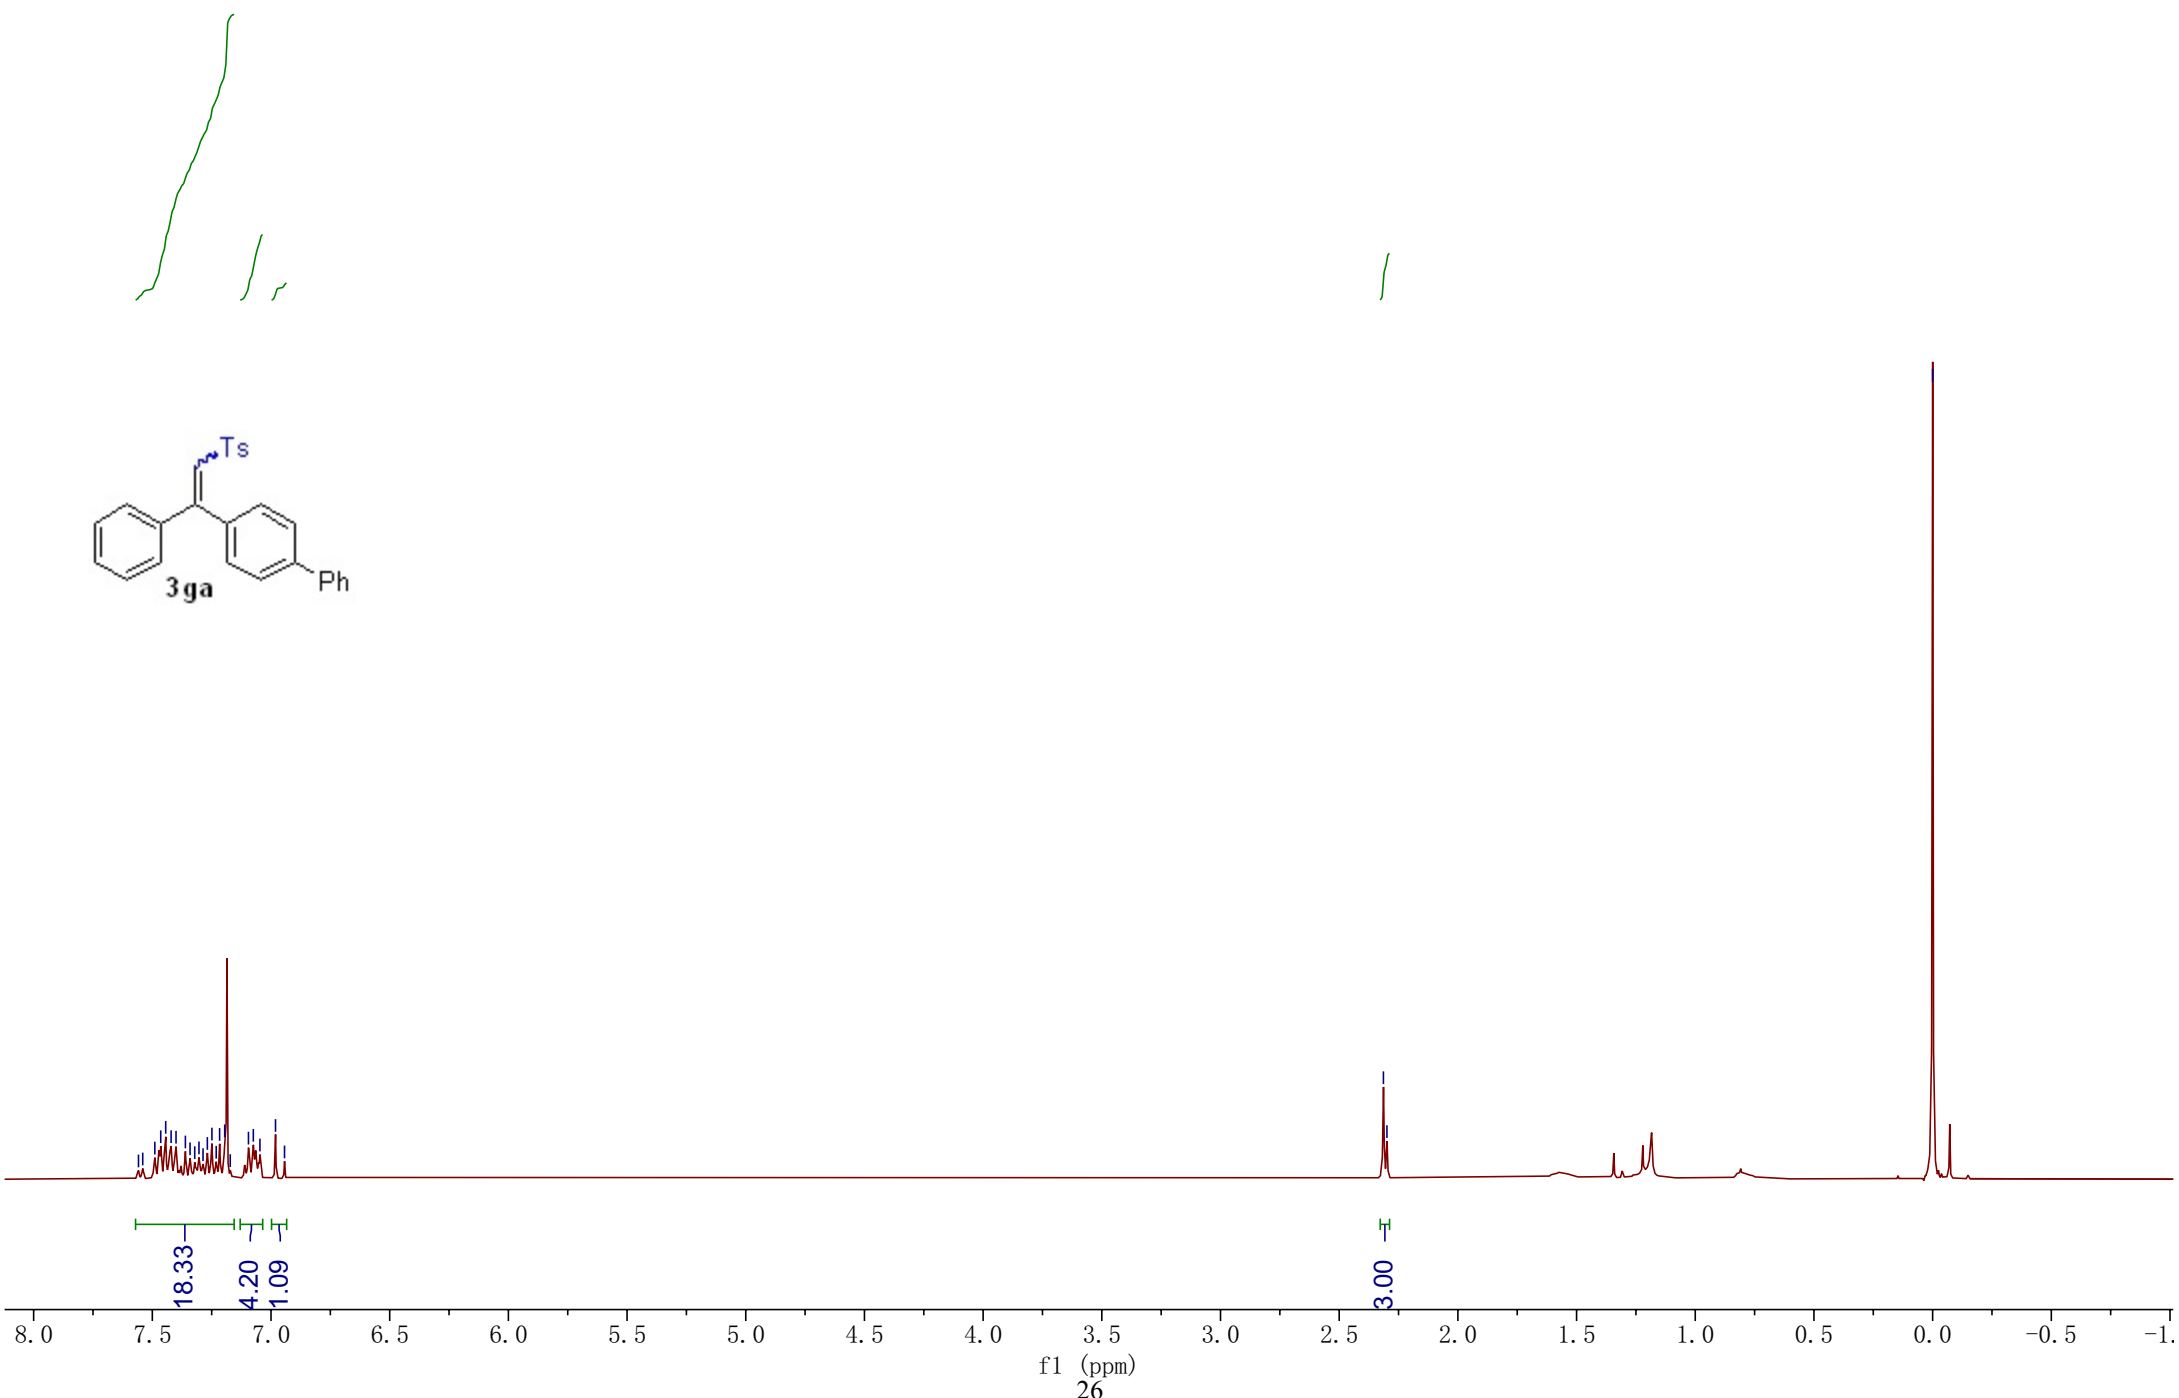

154.37  
143.88  
143.22  
140.00  
139.38  
138.11  
135.64  
130.52  
130.40  
129.92  
129.47  
129.41  
129.03  
128.80  
128.74  
128.45  
128.07  
127.99  
127.91  
127.85  
127.33  
127.23  
127.19  
126.56

77.48  
77.16  
76.84

21.70

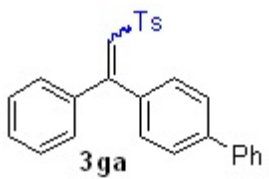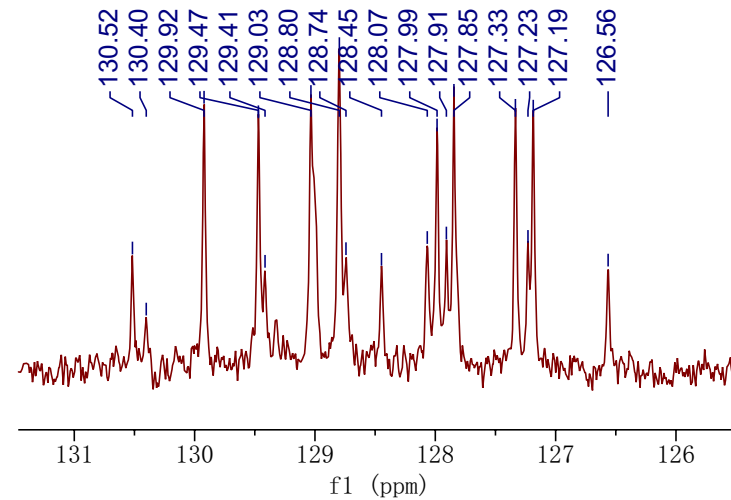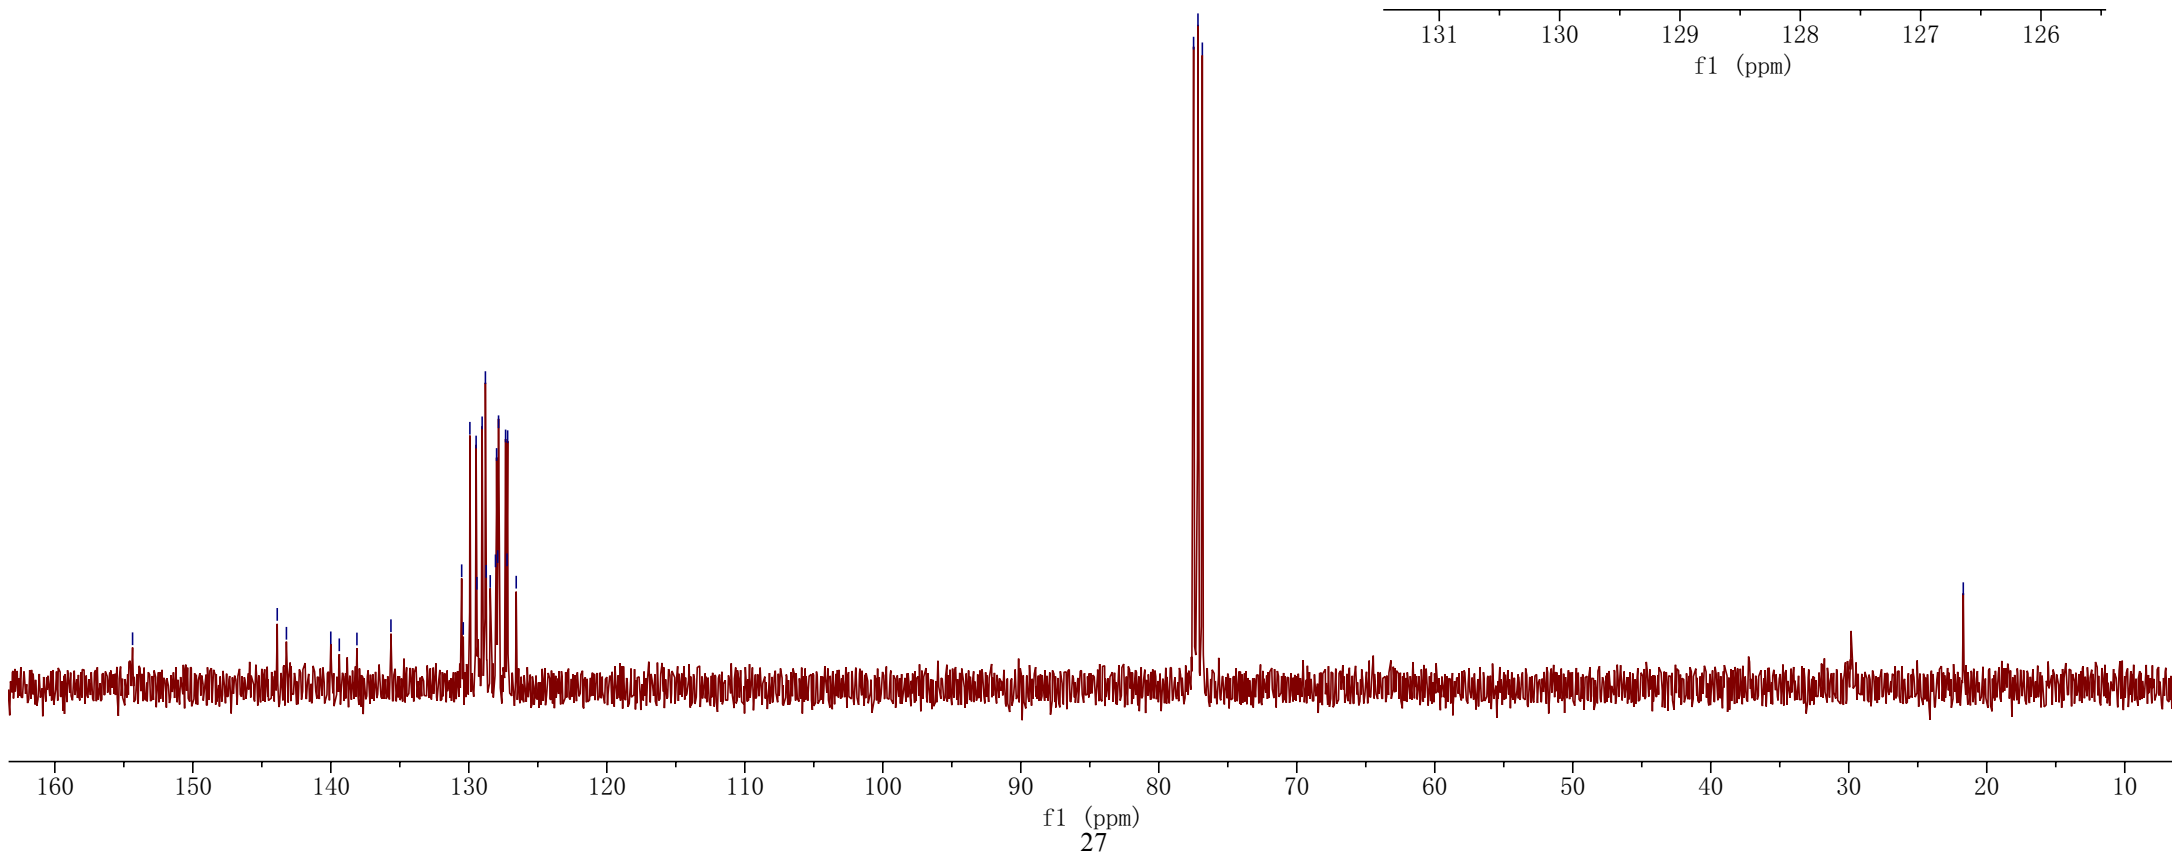

7.47  
7.46  
7.45  
7.44  
7.37  
7.36  
7.35  
7.34  
7.32  
7.31  
7.29  
7.28  
7.27  
7.22  
7.20  
7.18  
7.17  
7.15  
7.13  
7.09  
7.08  
7.03  
7.00  
6.97  
6.96  
6.94  
6.73

2.38  
2.29  
2.25

0.00

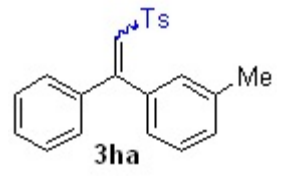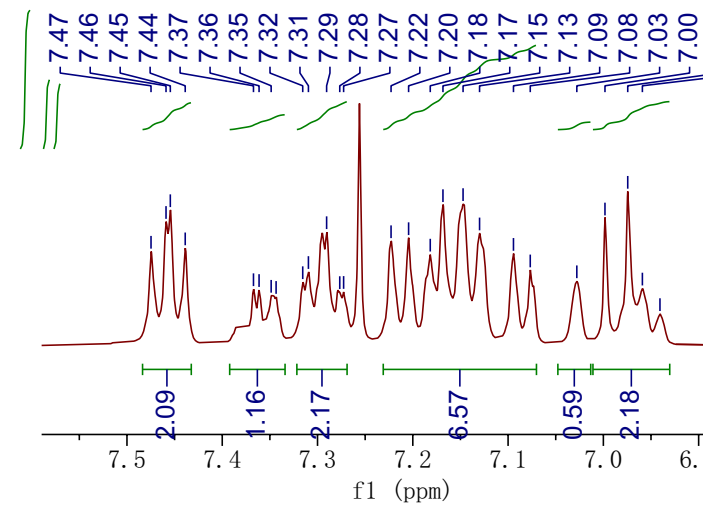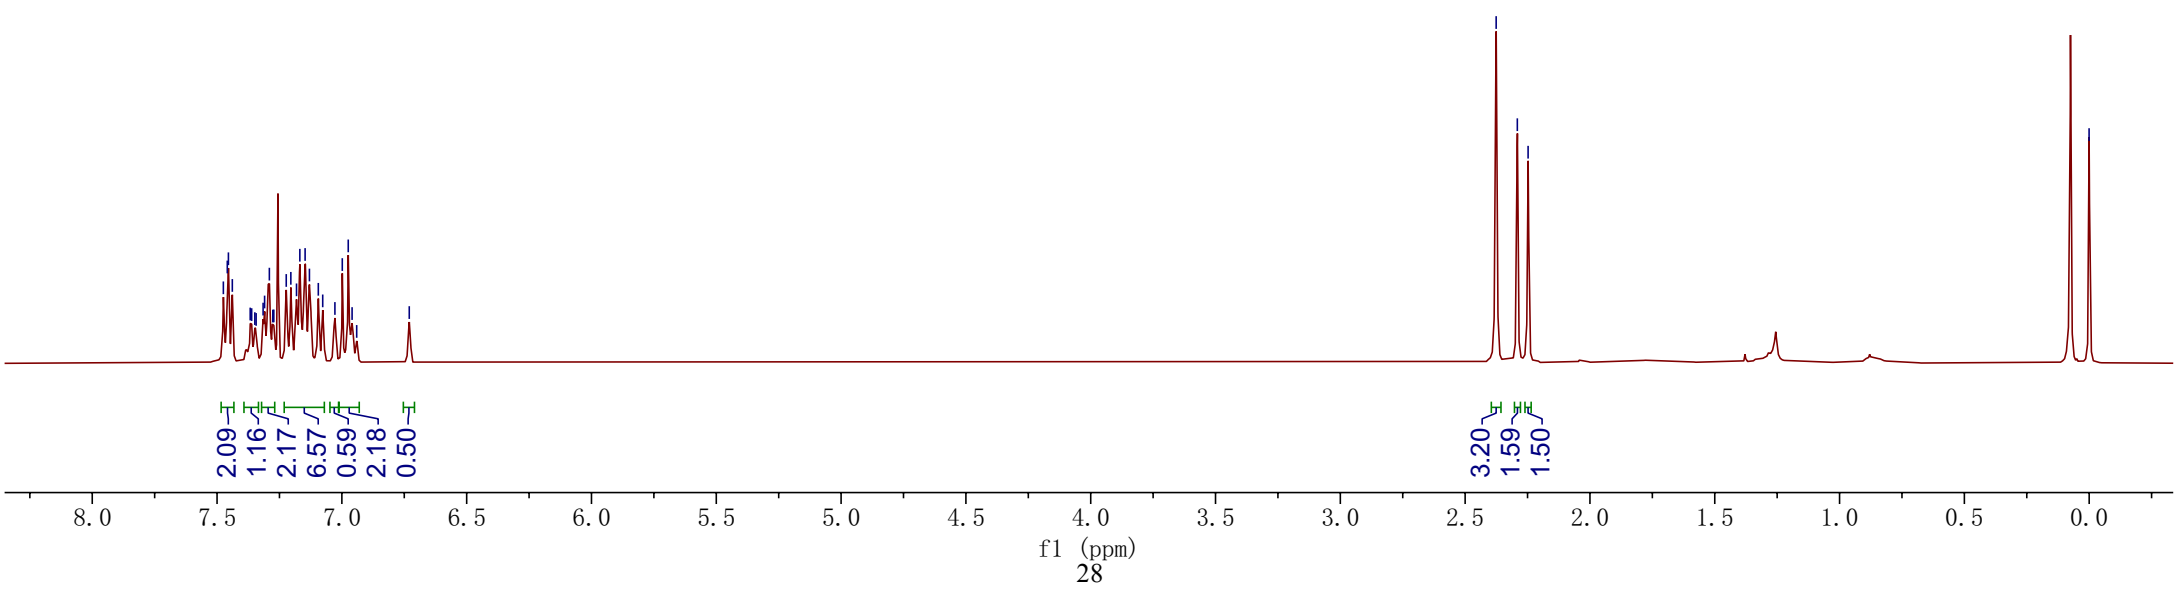

155.07  
143.80  
143.71  
139.36  
139.28  
138.77  
138.43  
137.51  
135.77  
135.53  
131.14  
130.30  
130.12  
129.86  
129.62  
129.41  
129.31  
129.09  
128.90  
128.79  
128.66  
128.55  
128.28  
127.86  
127.79  
127.12  
125.64

77.48  
77.16  
76.84

21.68  
21.65  
21.45  
21.40

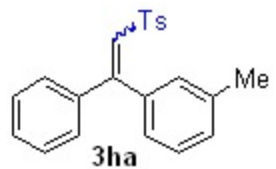

131.14  
130.30  
130.12  
129.86  
129.62  
129.41  
129.31  
129.09  
128.90  
128.79  
128.66  
128.55  
128.28  
127.86  
127.79  
127.12

125.64

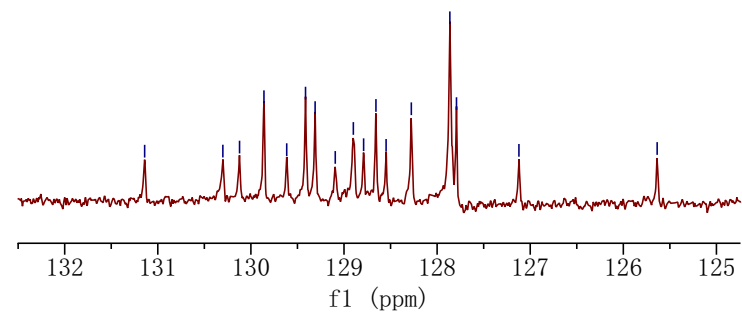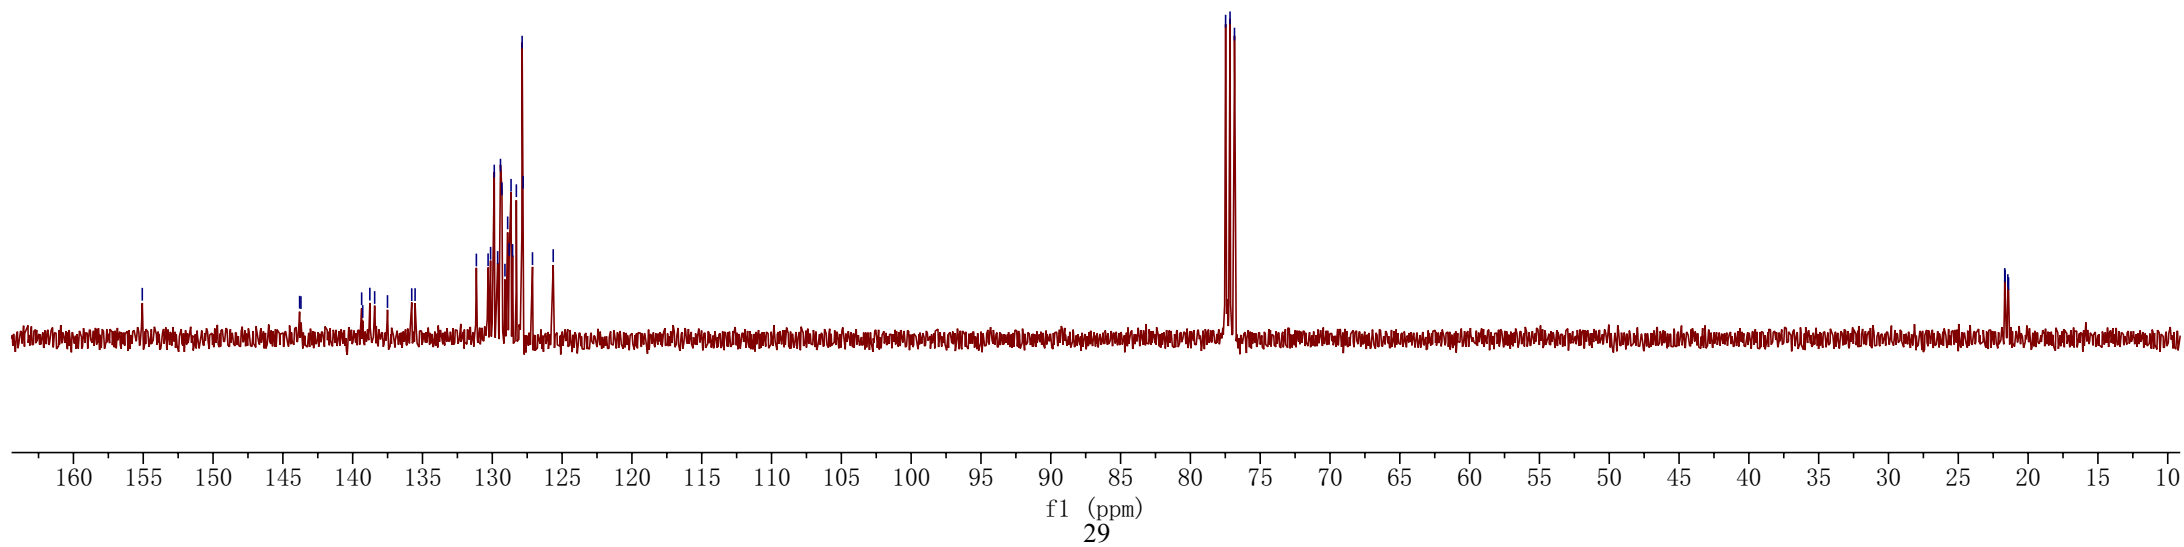

7.48  
7.46  
7.41  
7.39  
7.38  
7.37  
7.36  
7.33  
7.31  
7.30  
7.29  
7.27  
7.26  
7.25  
7.21  
7.20  
7.19  
7.19  
7.18  
7.17  
7.15  
7.13  
7.11  
7.10  
7.09  
7.07  
7.04  
6.97  
6.83

2.40  
2.38

0.00

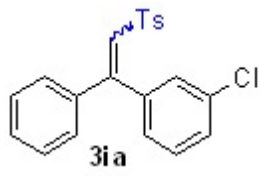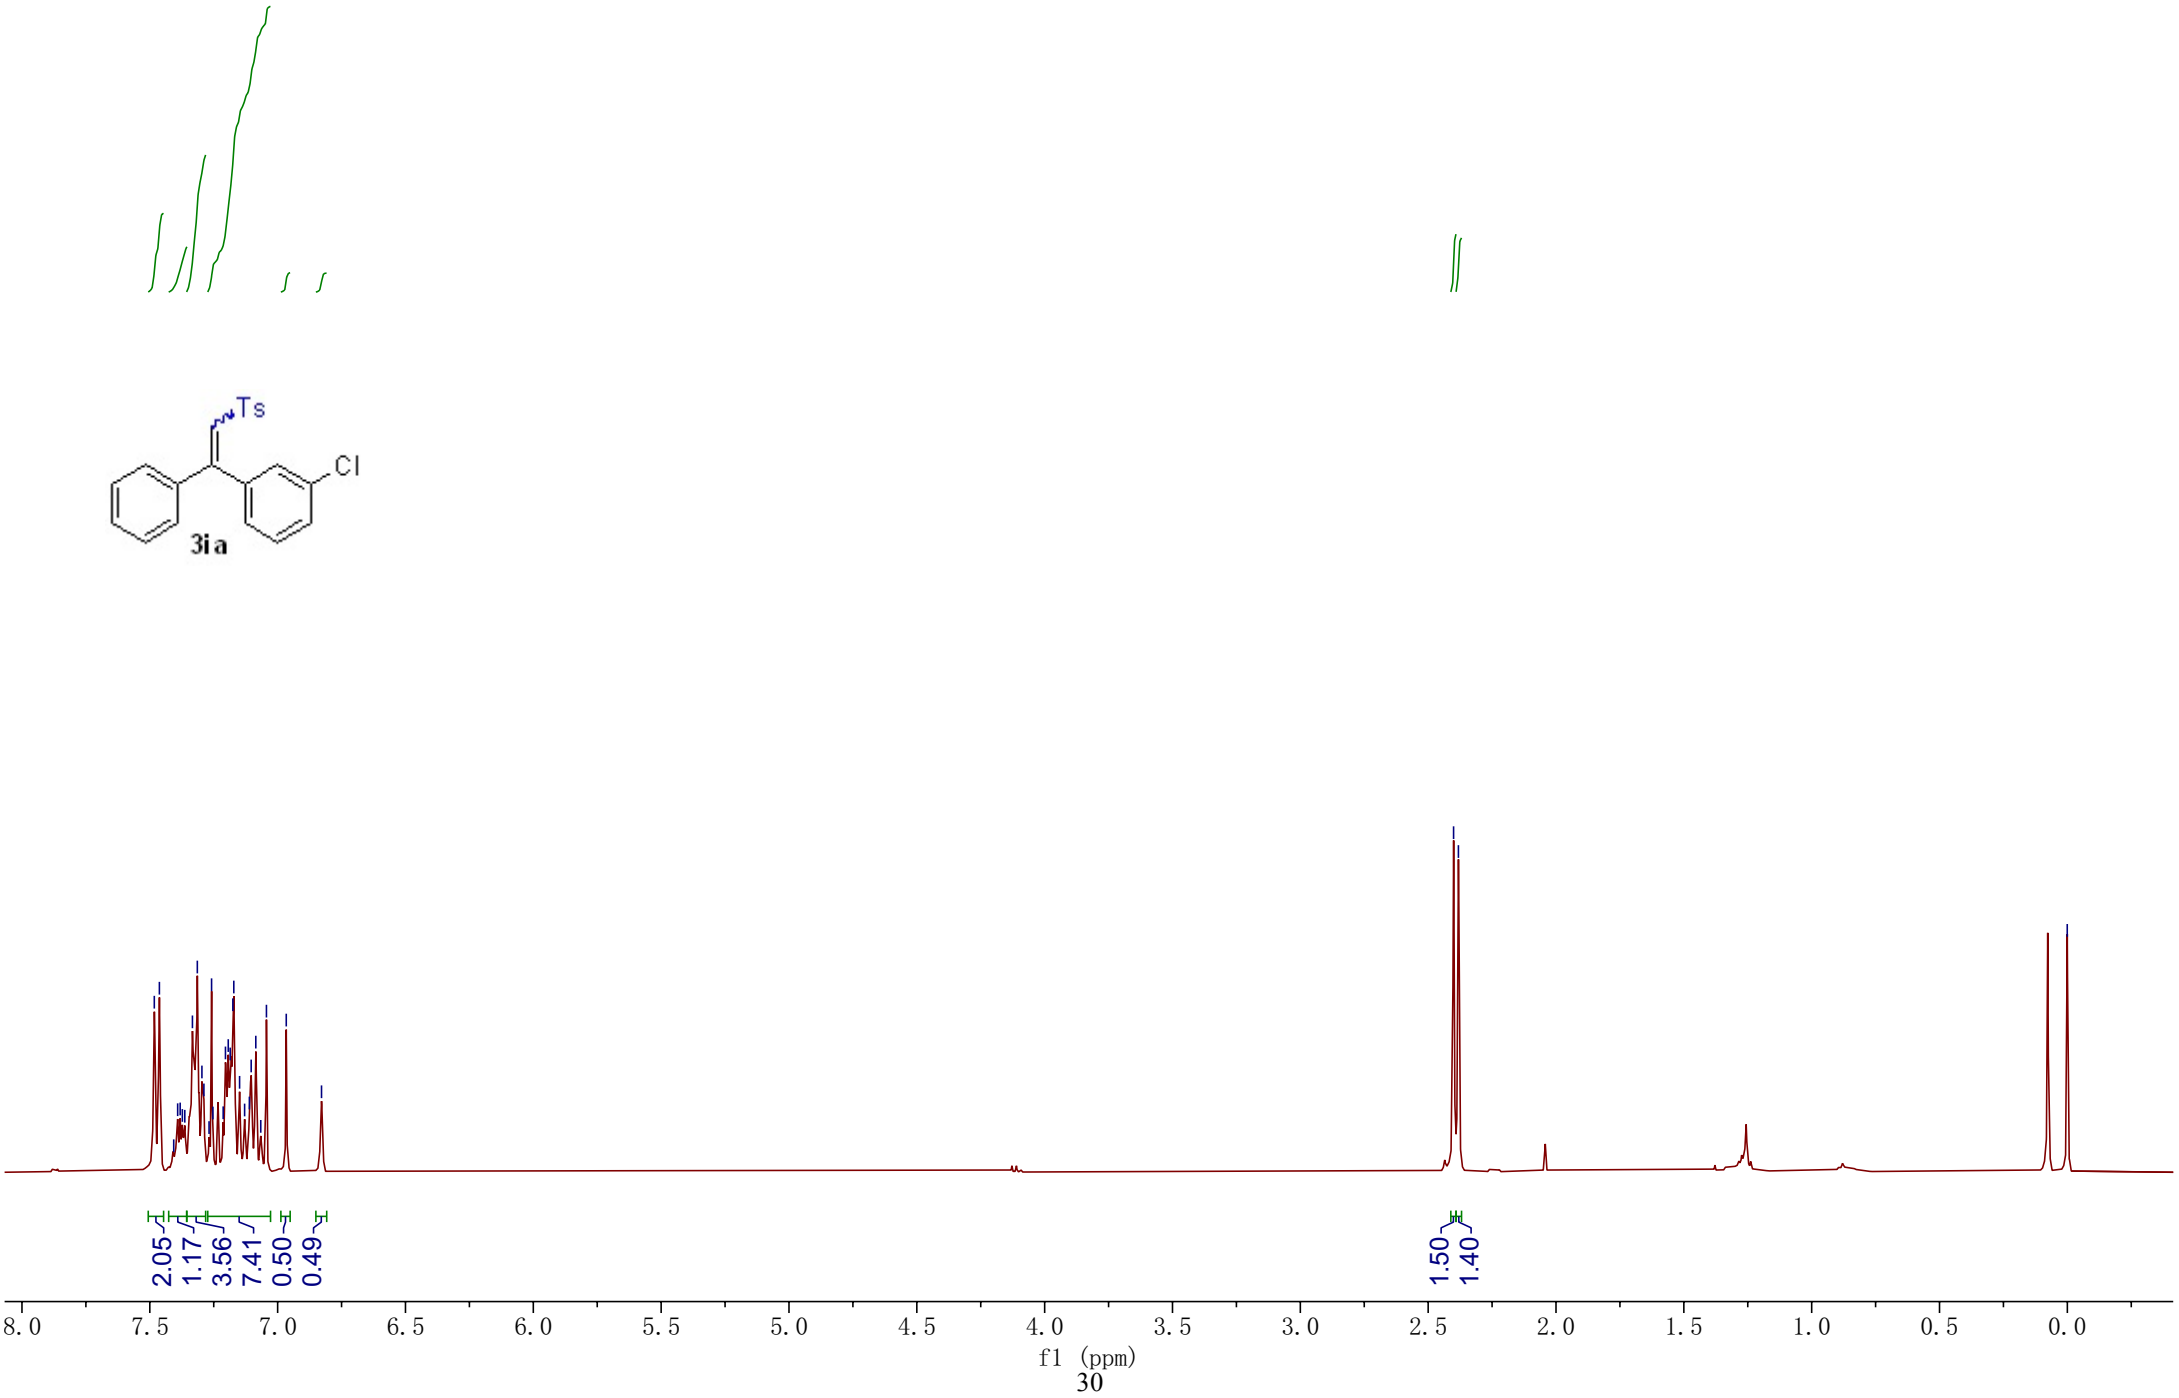

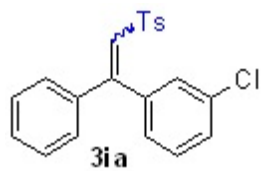

153.23  
152.97  
144.29  
144.11  
141.22  
138.39  
138.33  
137.26  
135.03  
134.77  
134.04  
130.61  
130.23  
129.99  
129.92  
129.80  
129.56  
129.52  
129.32  
129.24  
128.96  
128.84  
128.34  
128.22  
128.14  
128.08  
127.83  
127.78  
126.51

77.48  
77.16  
76.84

21.69

130.61  
130.23  
129.99  
129.92  
129.80  
129.56  
129.52  
129.32  
129.24  
128.96  
128.84  
128.34  
128.22  
128.14  
128.08  
127.83  
127.78  
126.51

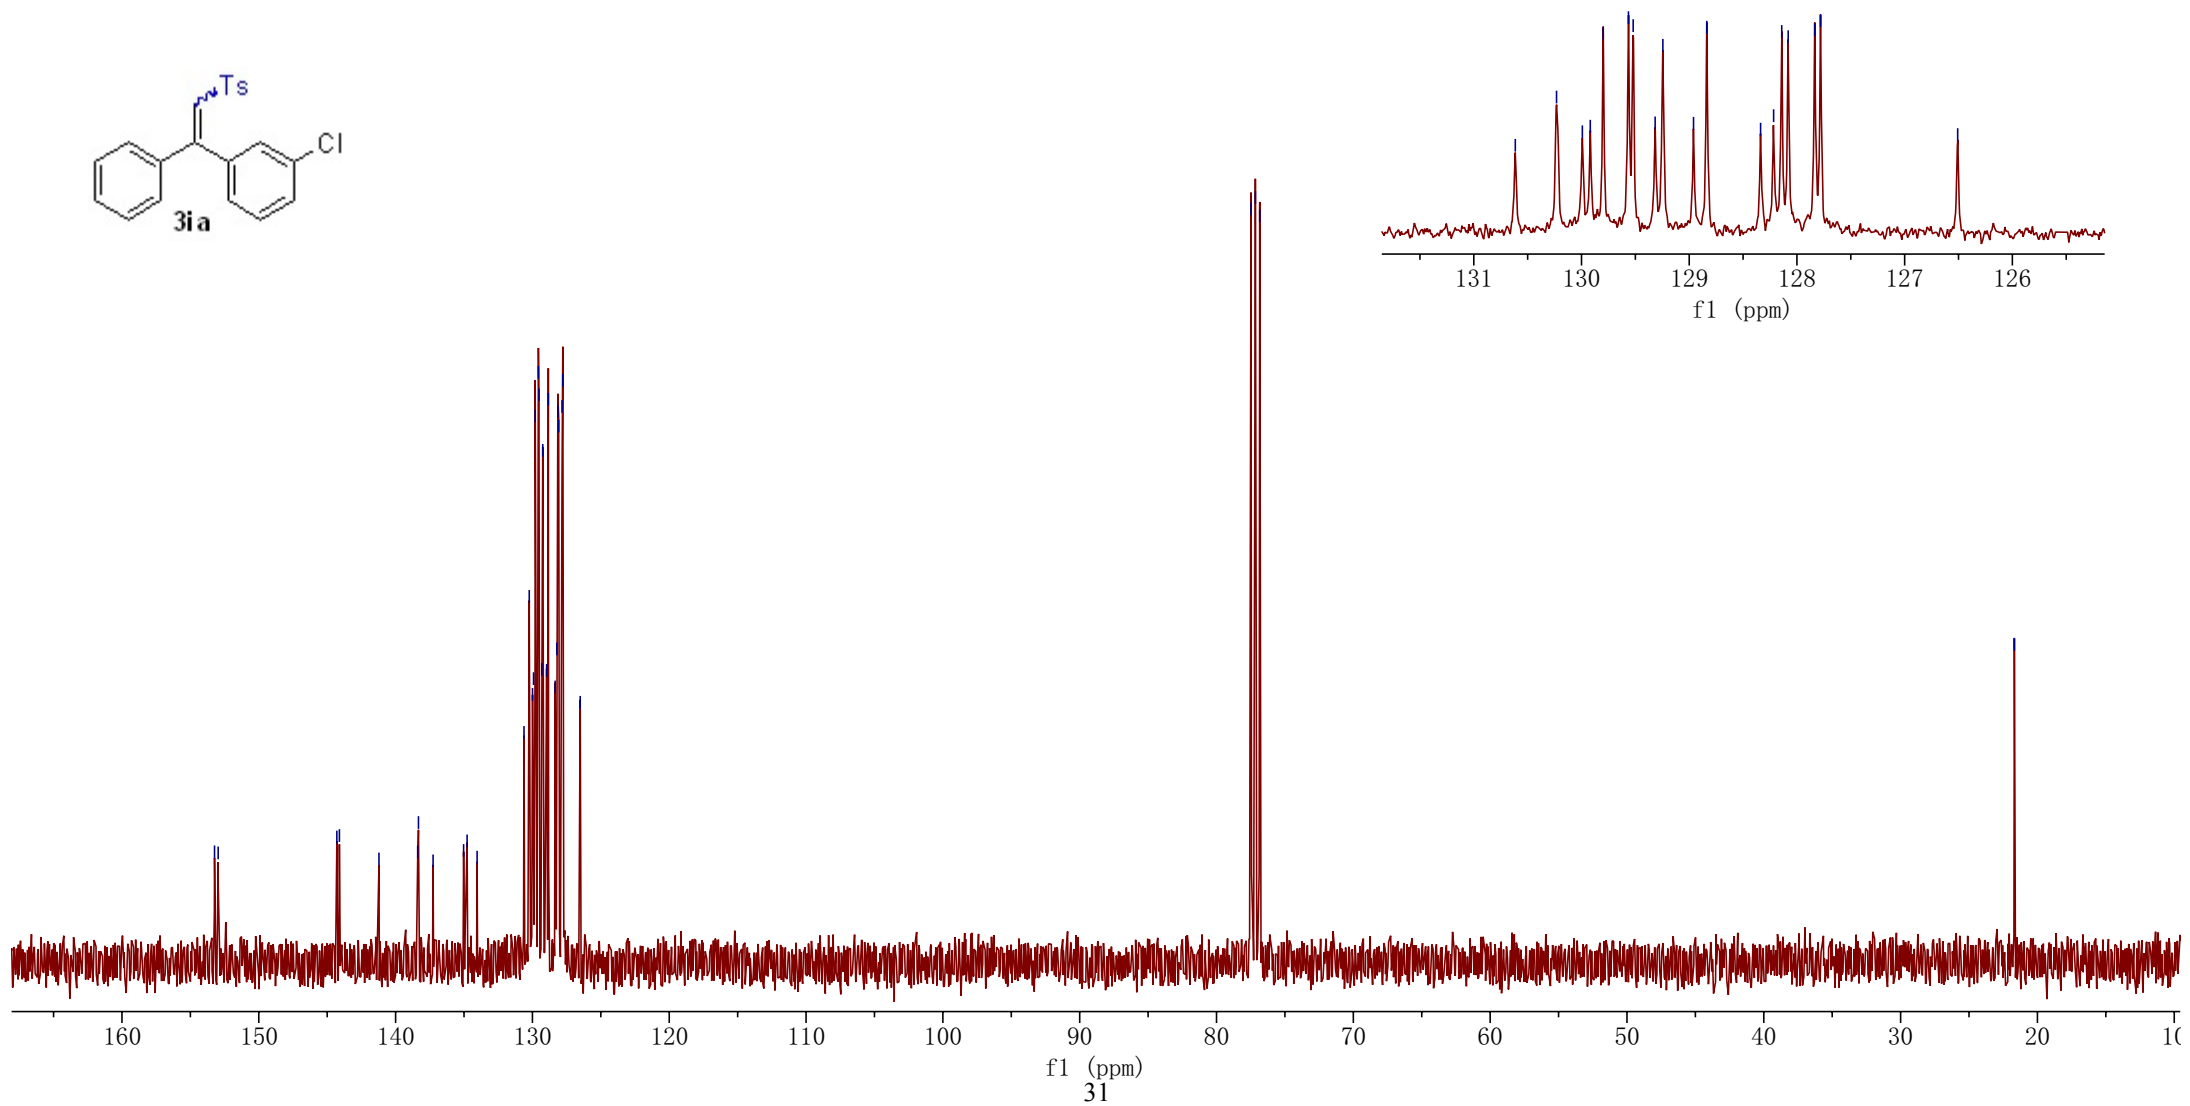

7.59  
7.57  
7.39  
7.37  
7.35  
7.33  
7.31  
7.29  
7.27  
7.26  
7.23  
7.21  
7.19  
7.17  
7.14  
7.12  
7.07  
7.05  
6.59

-2.38  
-2.04  
-1.69  
-0.00

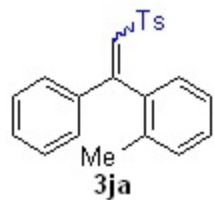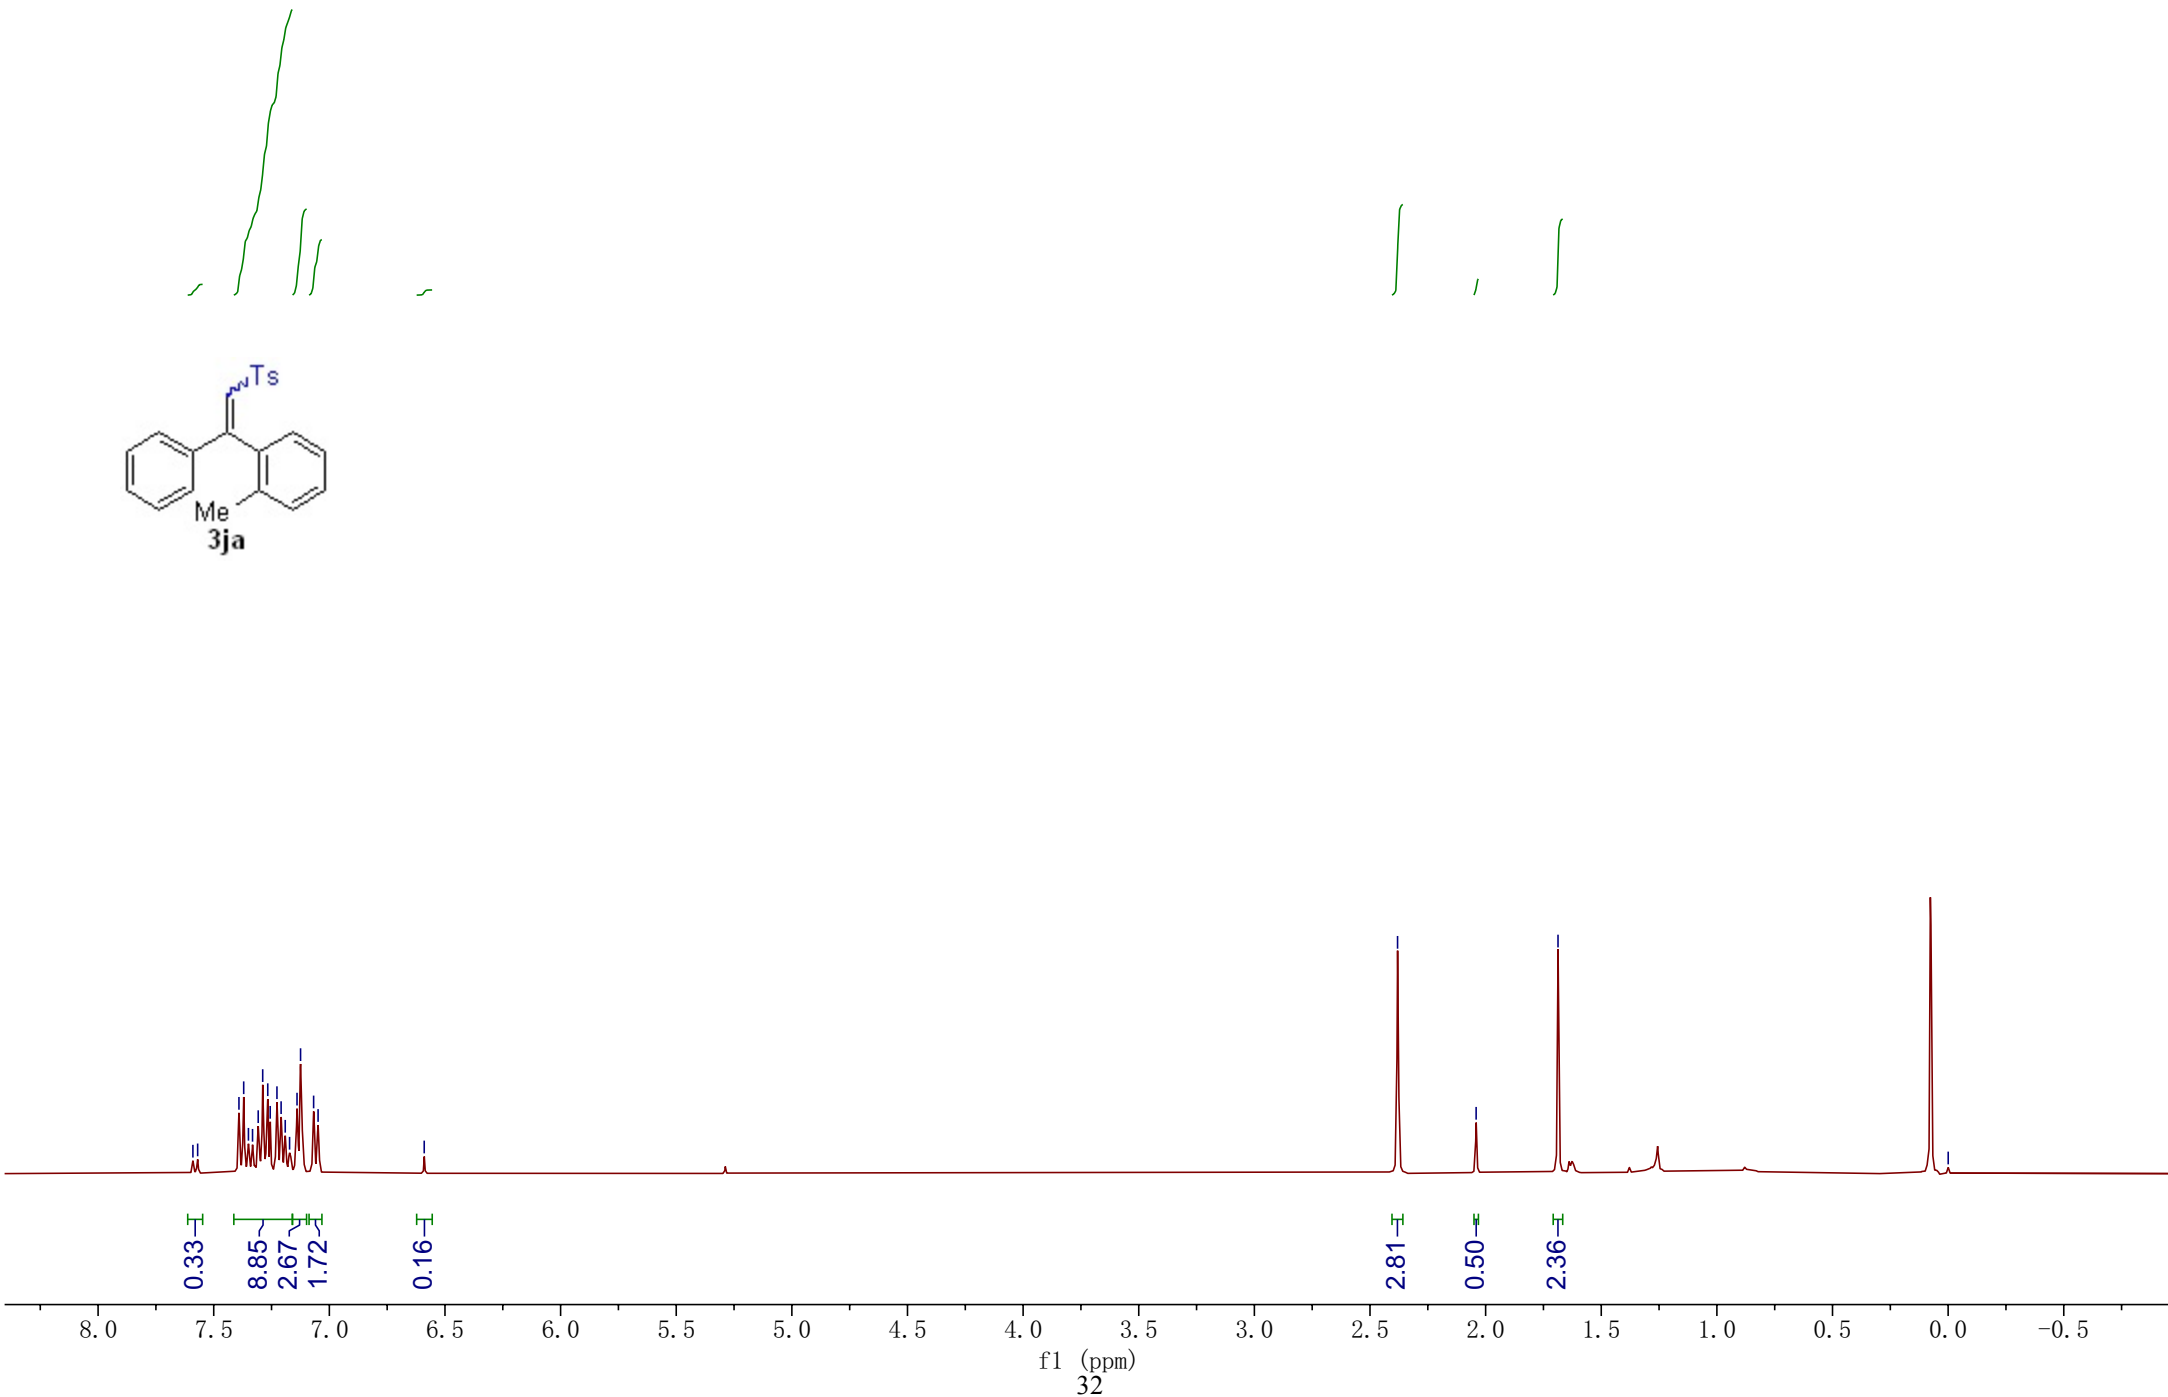



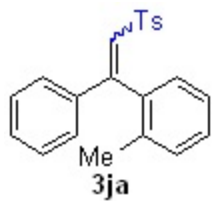

154.48  
143.92  
138.33  
137.74  
136.34  
134.55  
131.37  
131.02  
130.39  
130.09  
130.08  
129.94  
129.51  
129.47  
129.33  
129.15  
128.93  
128.86  
127.99  
127.78  
127.67  
127.37  
125.92  
125.29

77.48  
77.16  
76.84

21.68  
20.35  
19.59  
17.79

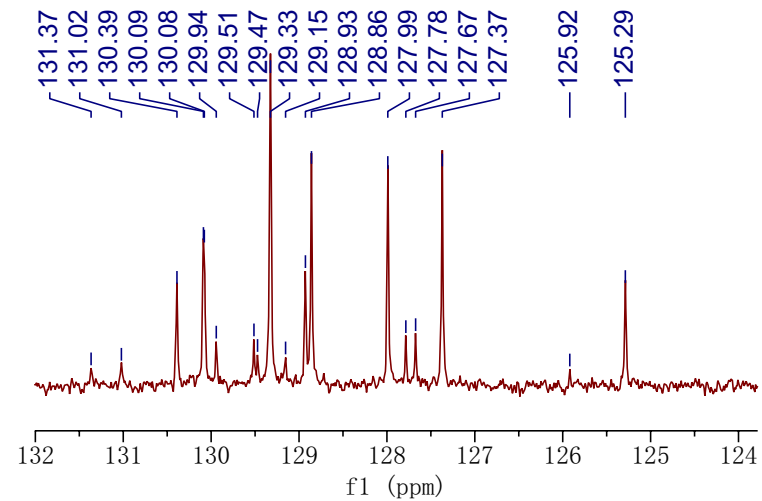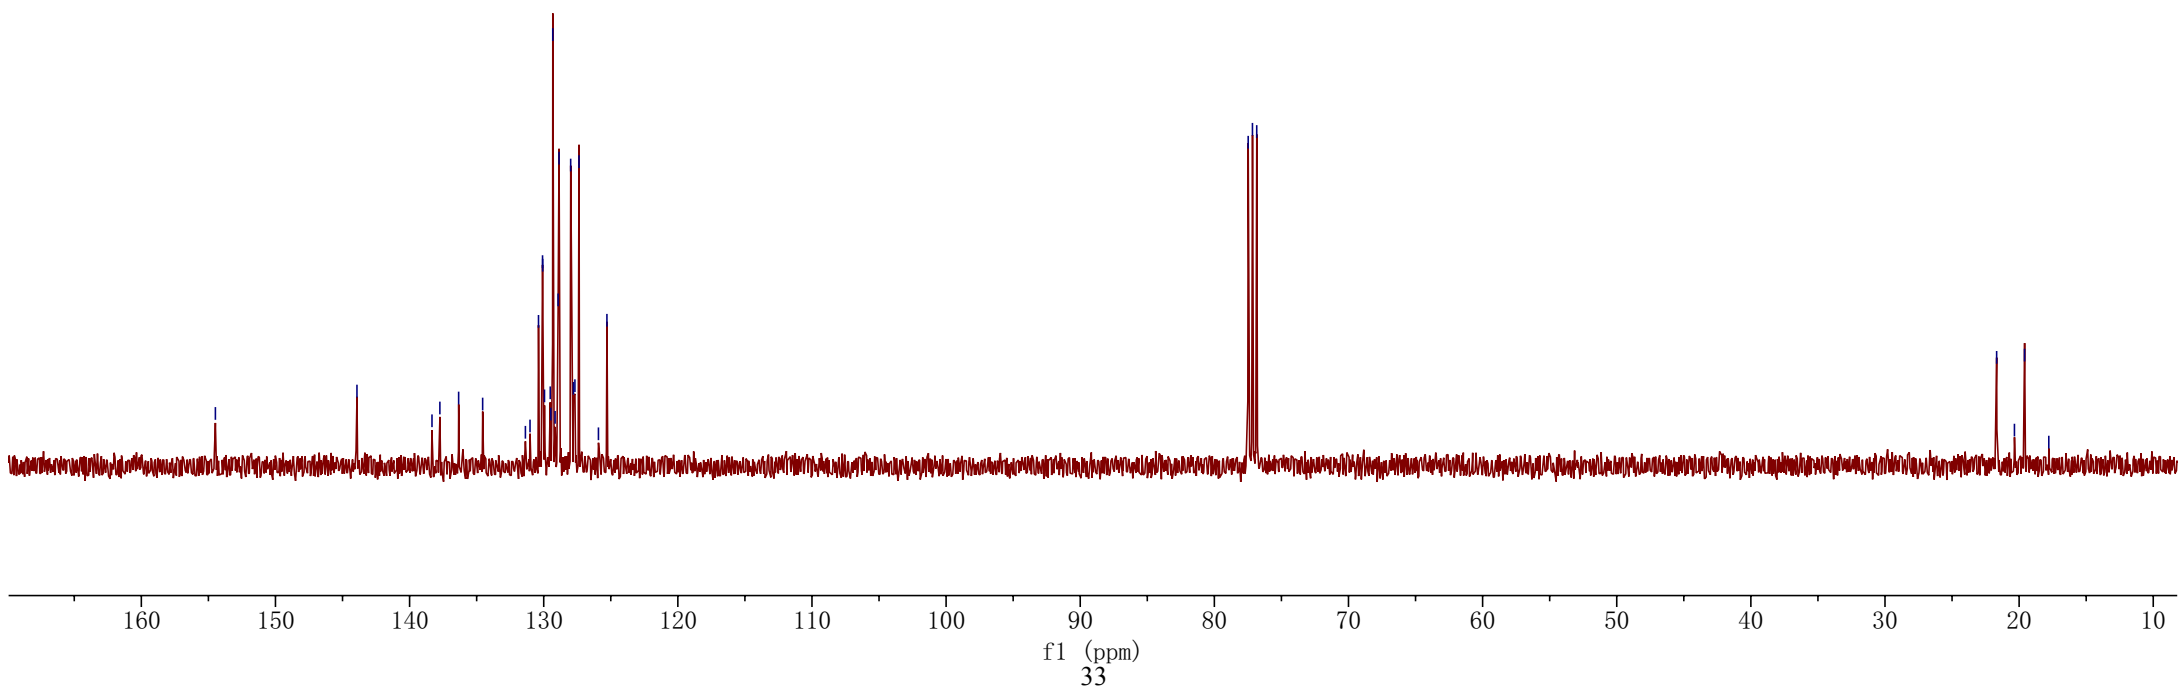

7.58  
7.56  
7.52  
7.50  
7.36  
7.36  
7.35  
7.34  
7.32  
7.30  
7.28  
7.27  
7.27  
7.26  
7.23  
7.21  
7.20  
7.19  
7.17  
7.16  
7.07  
6.71

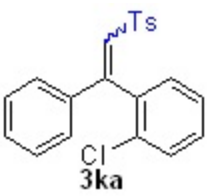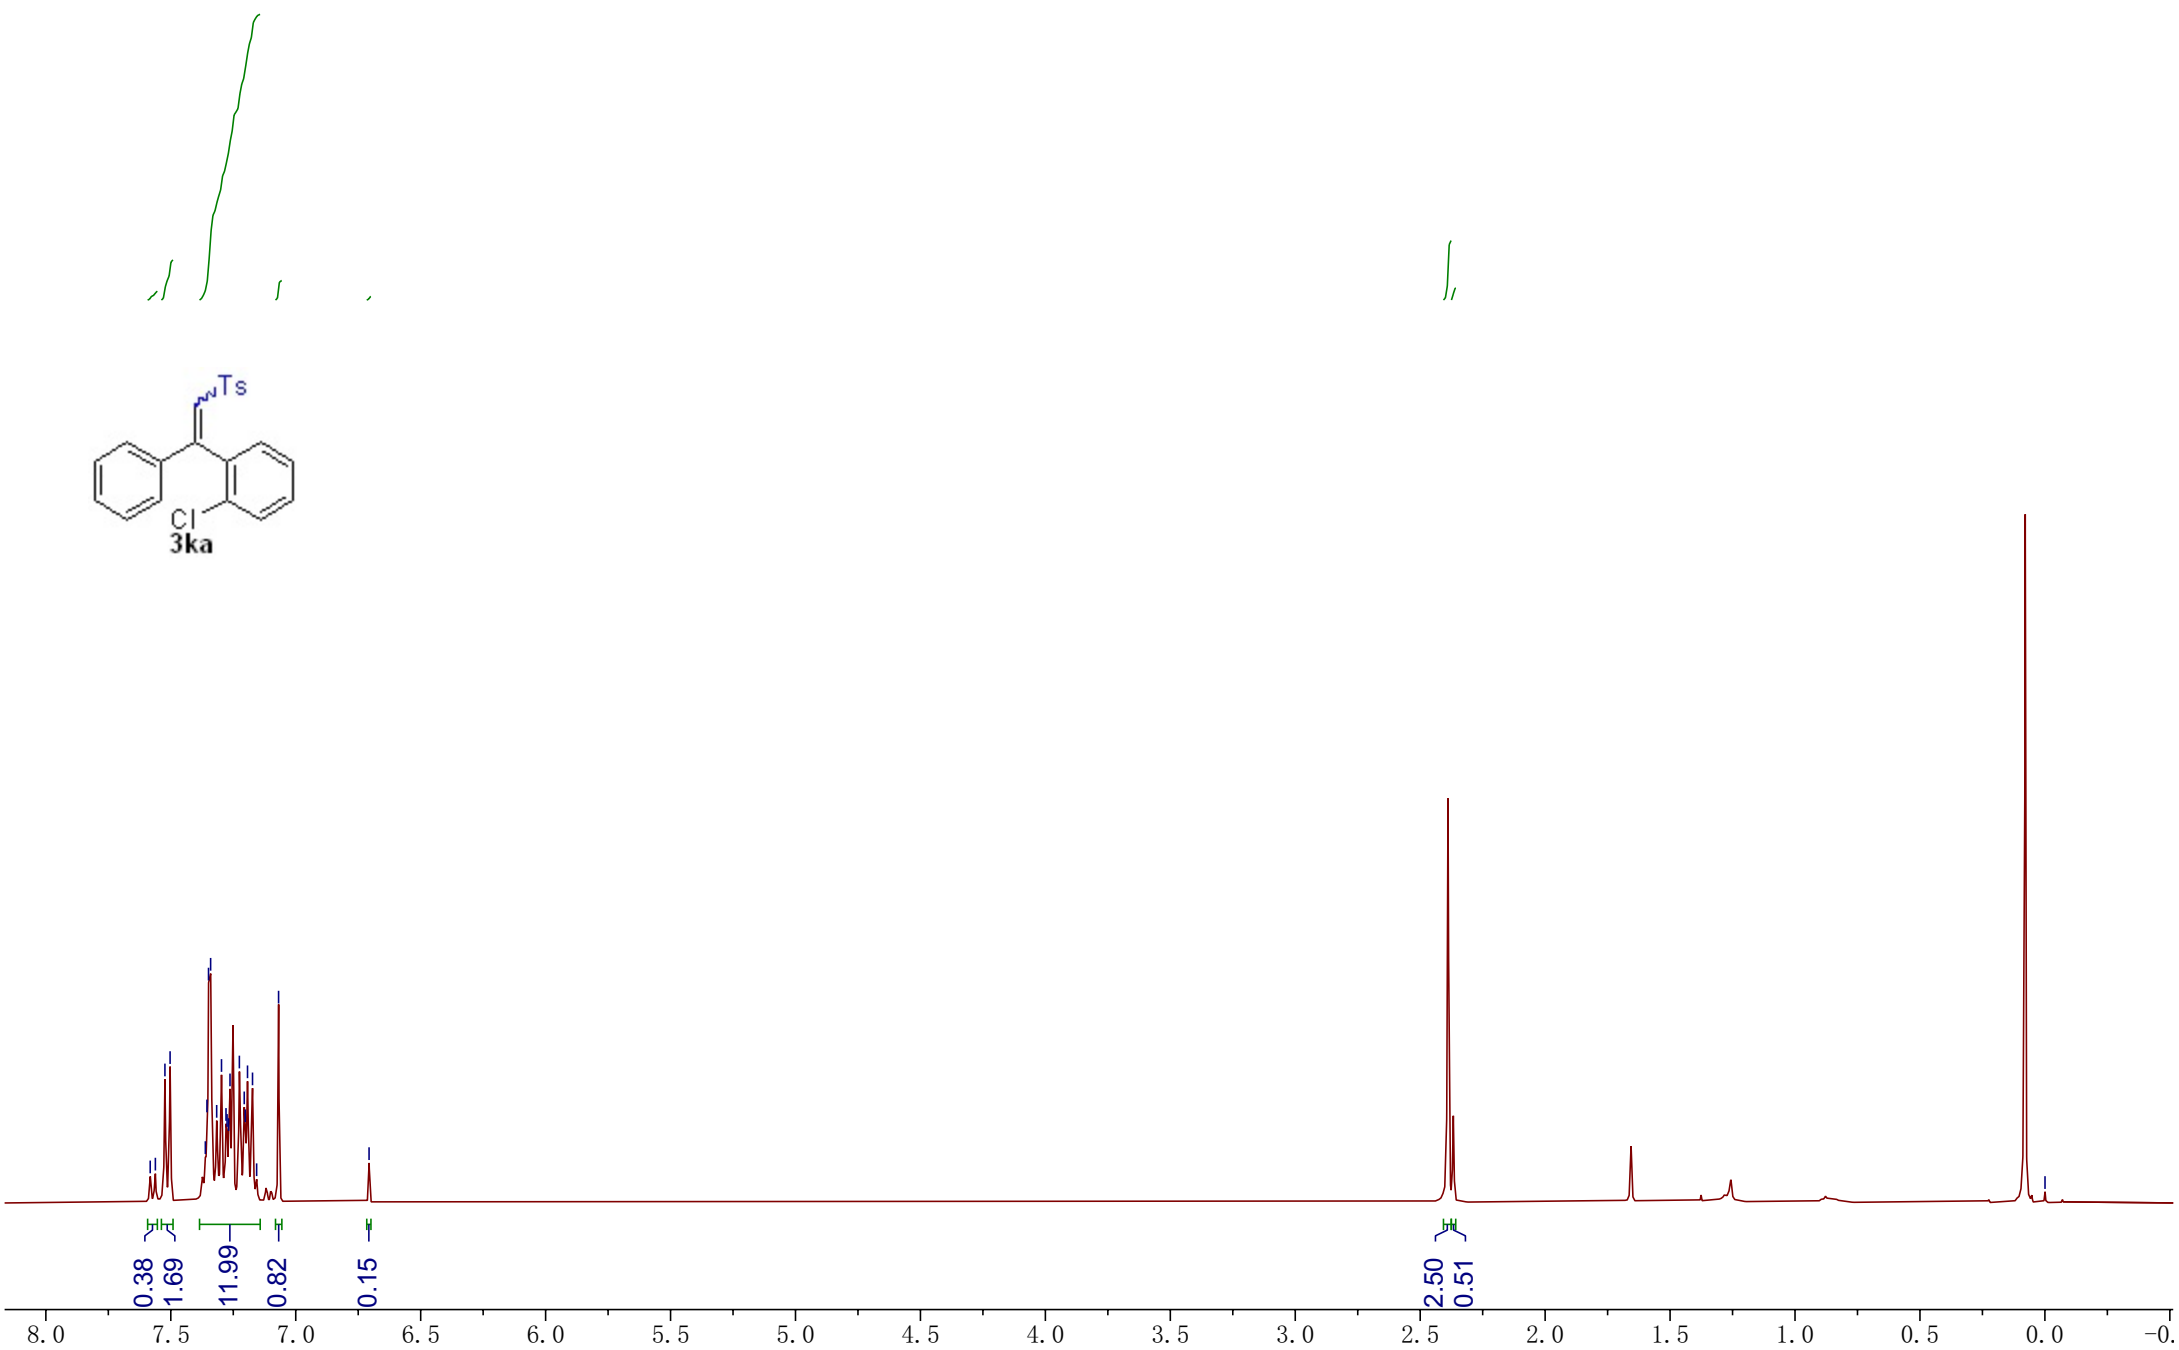

—0.00

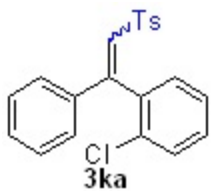

151.24  
144.26  
137.87  
137.15  
134.24  
133.23  
133.09  
131.94  
130.94  
130.44  
130.22  
129.83  
129.75  
129.58  
129.56  
129.49  
129.37  
128.86  
127.98  
127.83  
127.80  
127.40  
126.90  
126.38

77.48  
77.16  
76.84

21.73  
21.70

131.94  
130.94  
130.44  
130.22  
129.83  
129.75  
129.58  
129.56  
129.49  
129.37  
128.86  
127.98  
127.83  
127.80  
127.40  
126.90  
126.38

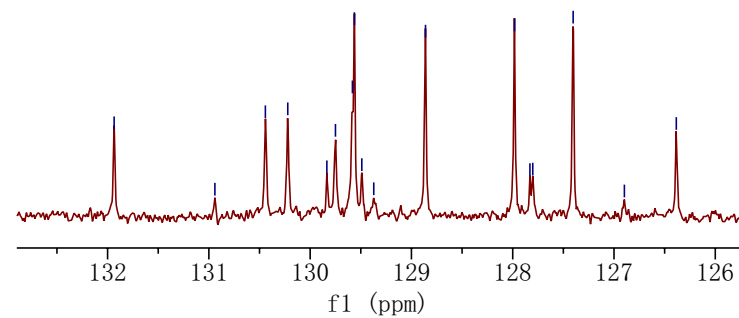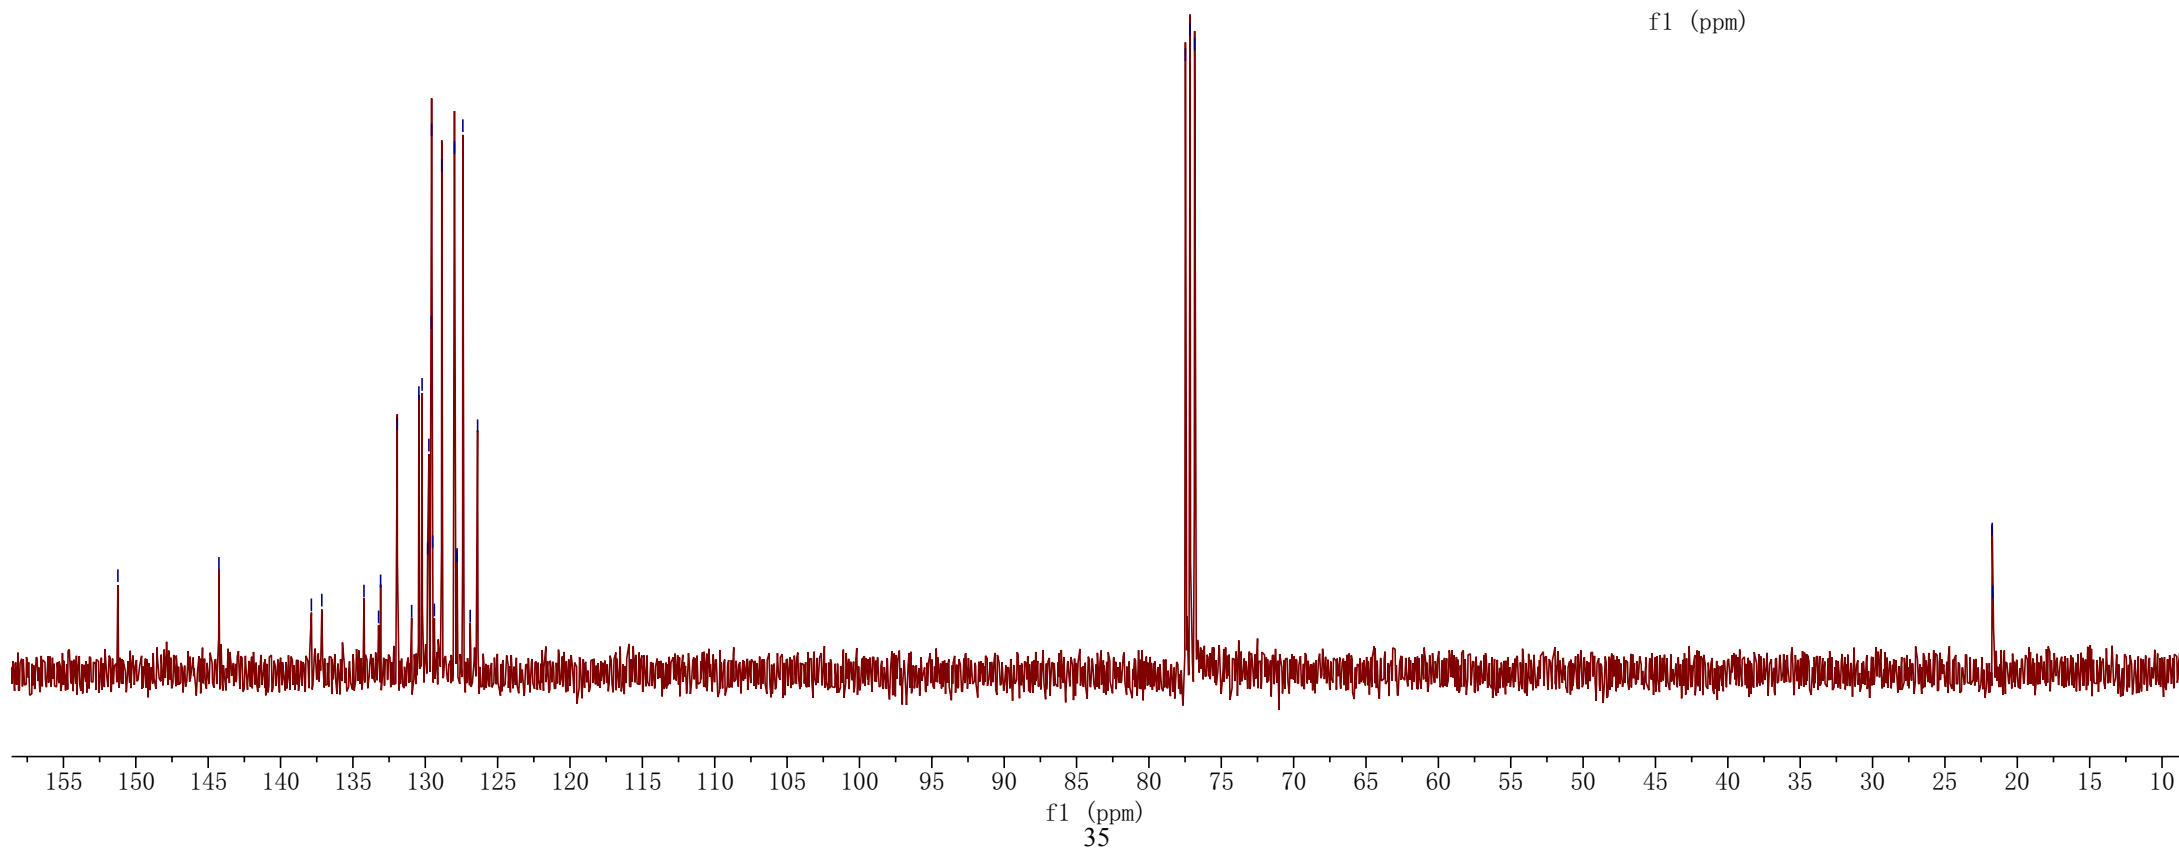

7.86  
7.84  
7.73  
7.71  
7.54  
7.53  
7.51  
7.47  
7.45  
7.36  
7.33  
7.31  
7.29  
7.27  
7.26  
7.12  
7.10  
7.08  
7.05  
7.04  
7.03  
7.00  
6.71  
6.69

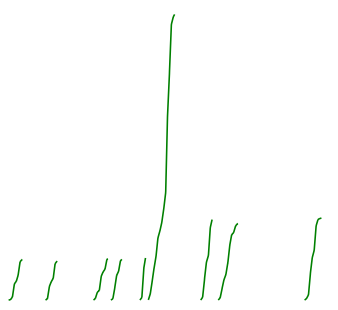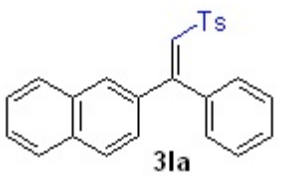

—2.11

—0.00

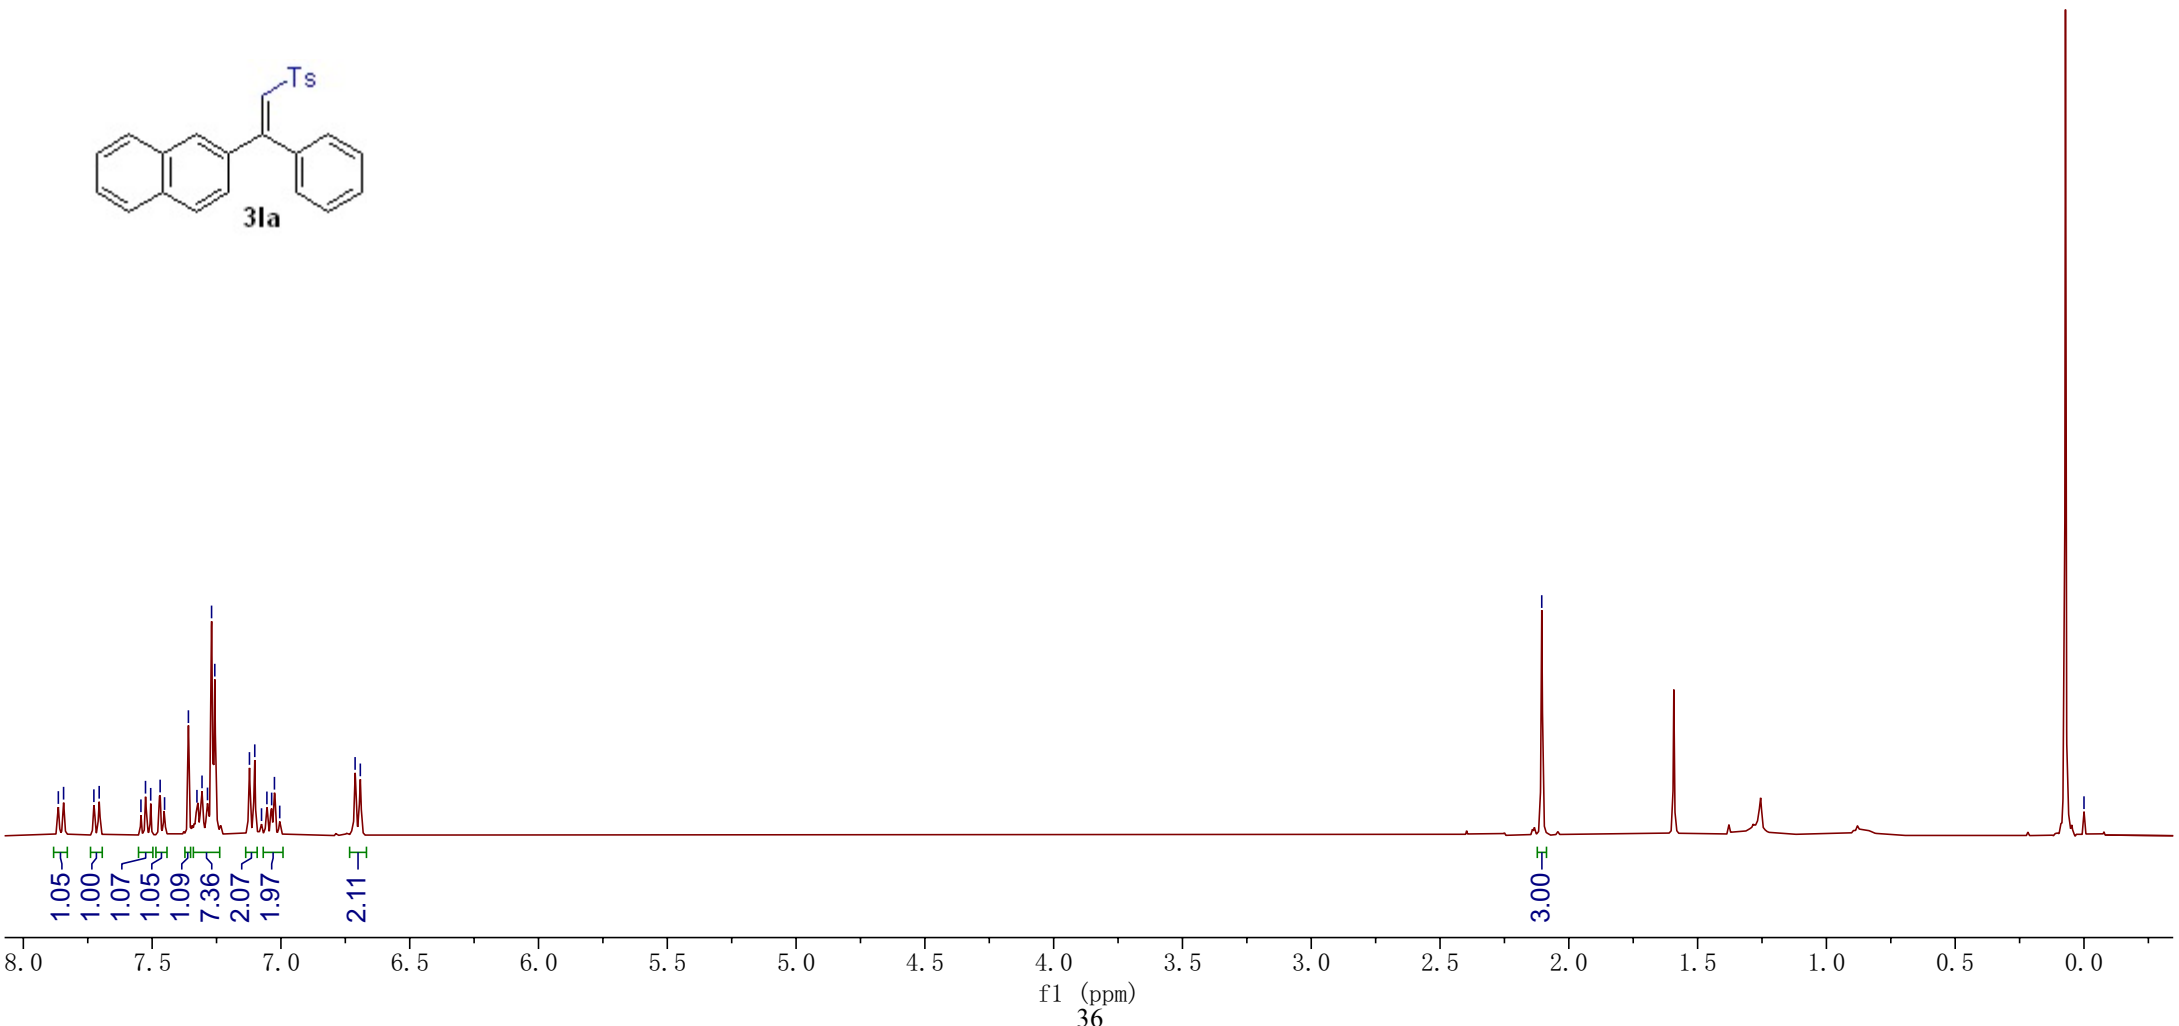

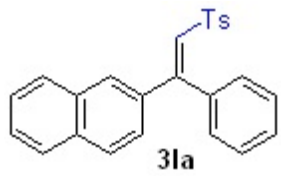

— 153.14  
— 143.35  
— 138.23  
— 133.41  
— 132.12  
— 131.61  
— 130.75  
— 130.71  
— 130.46  
— 129.51  
— 129.46  
— 128.93  
— 128.81  
— 128.15  
— 127.68  
— 127.38  
— 126.08  
— 125.70  
— 125.68  
— 124.99

— 77.48  
— 77.16  
— 76.84

— 21.39

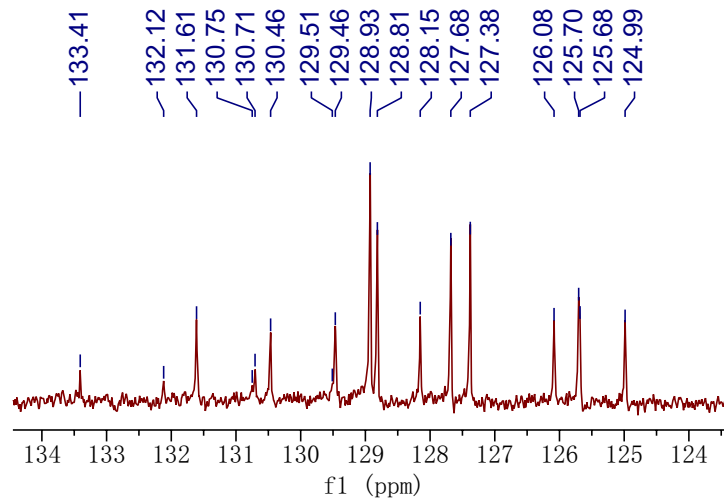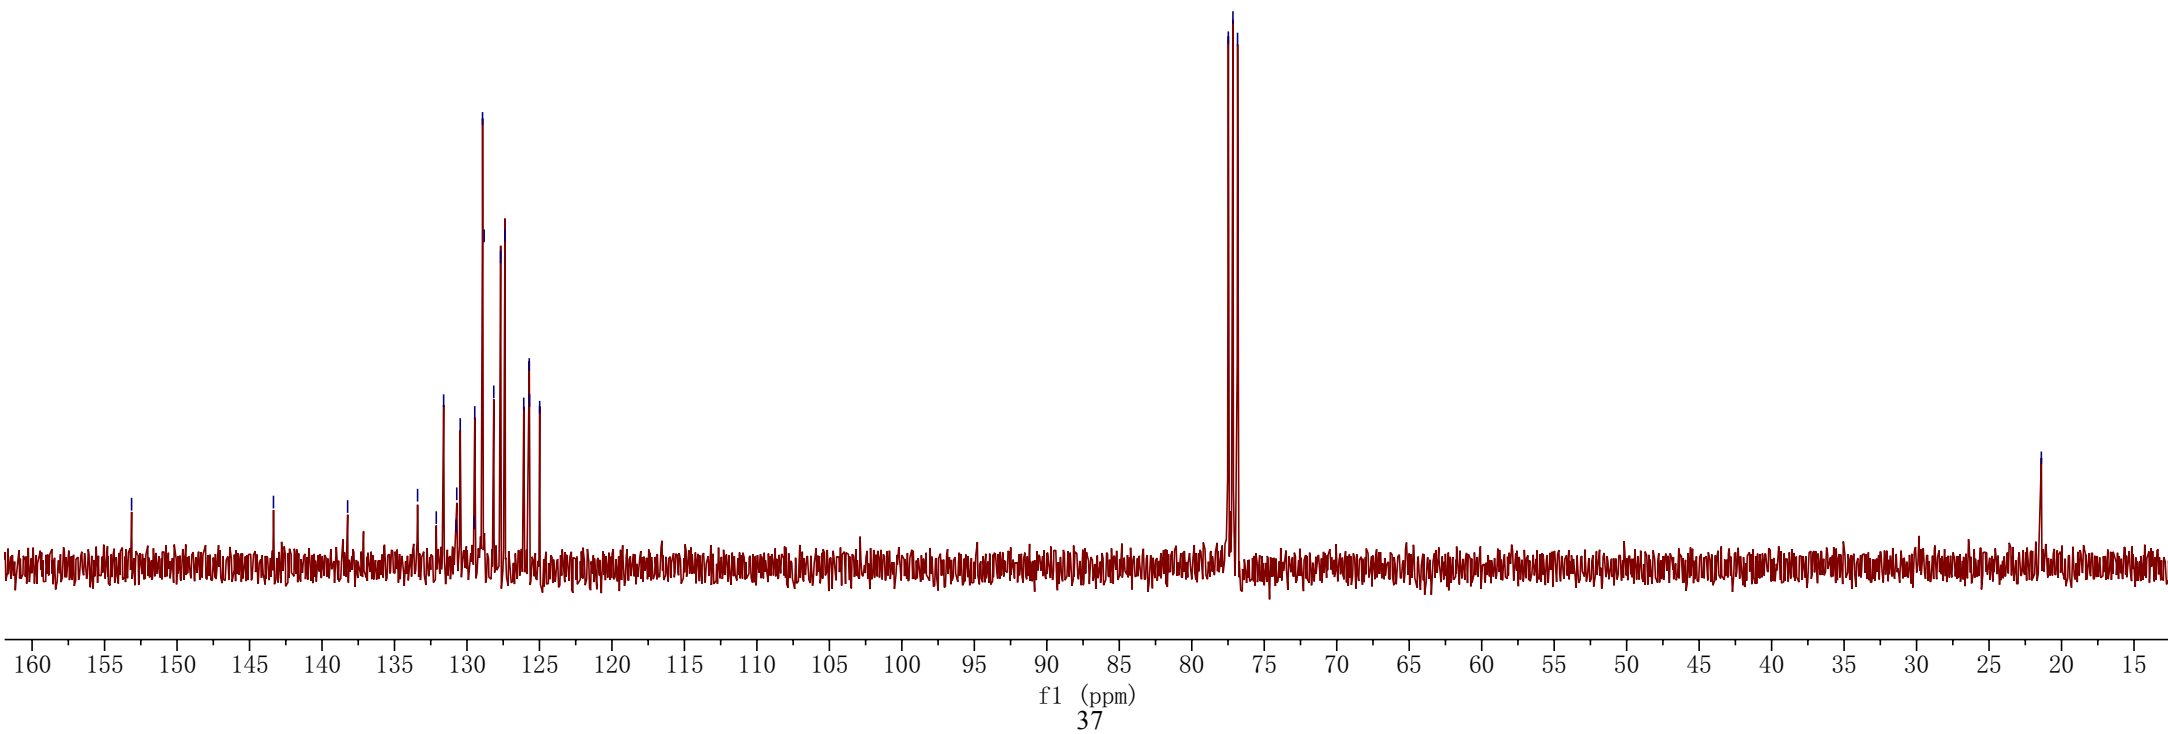

7.86  
7.84  
7.39  
7.37  
7.37  
7.36  
7.34

6.60  
6.59

2.52  
2.52  
2.44

0.00

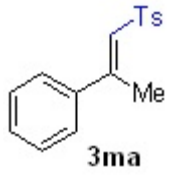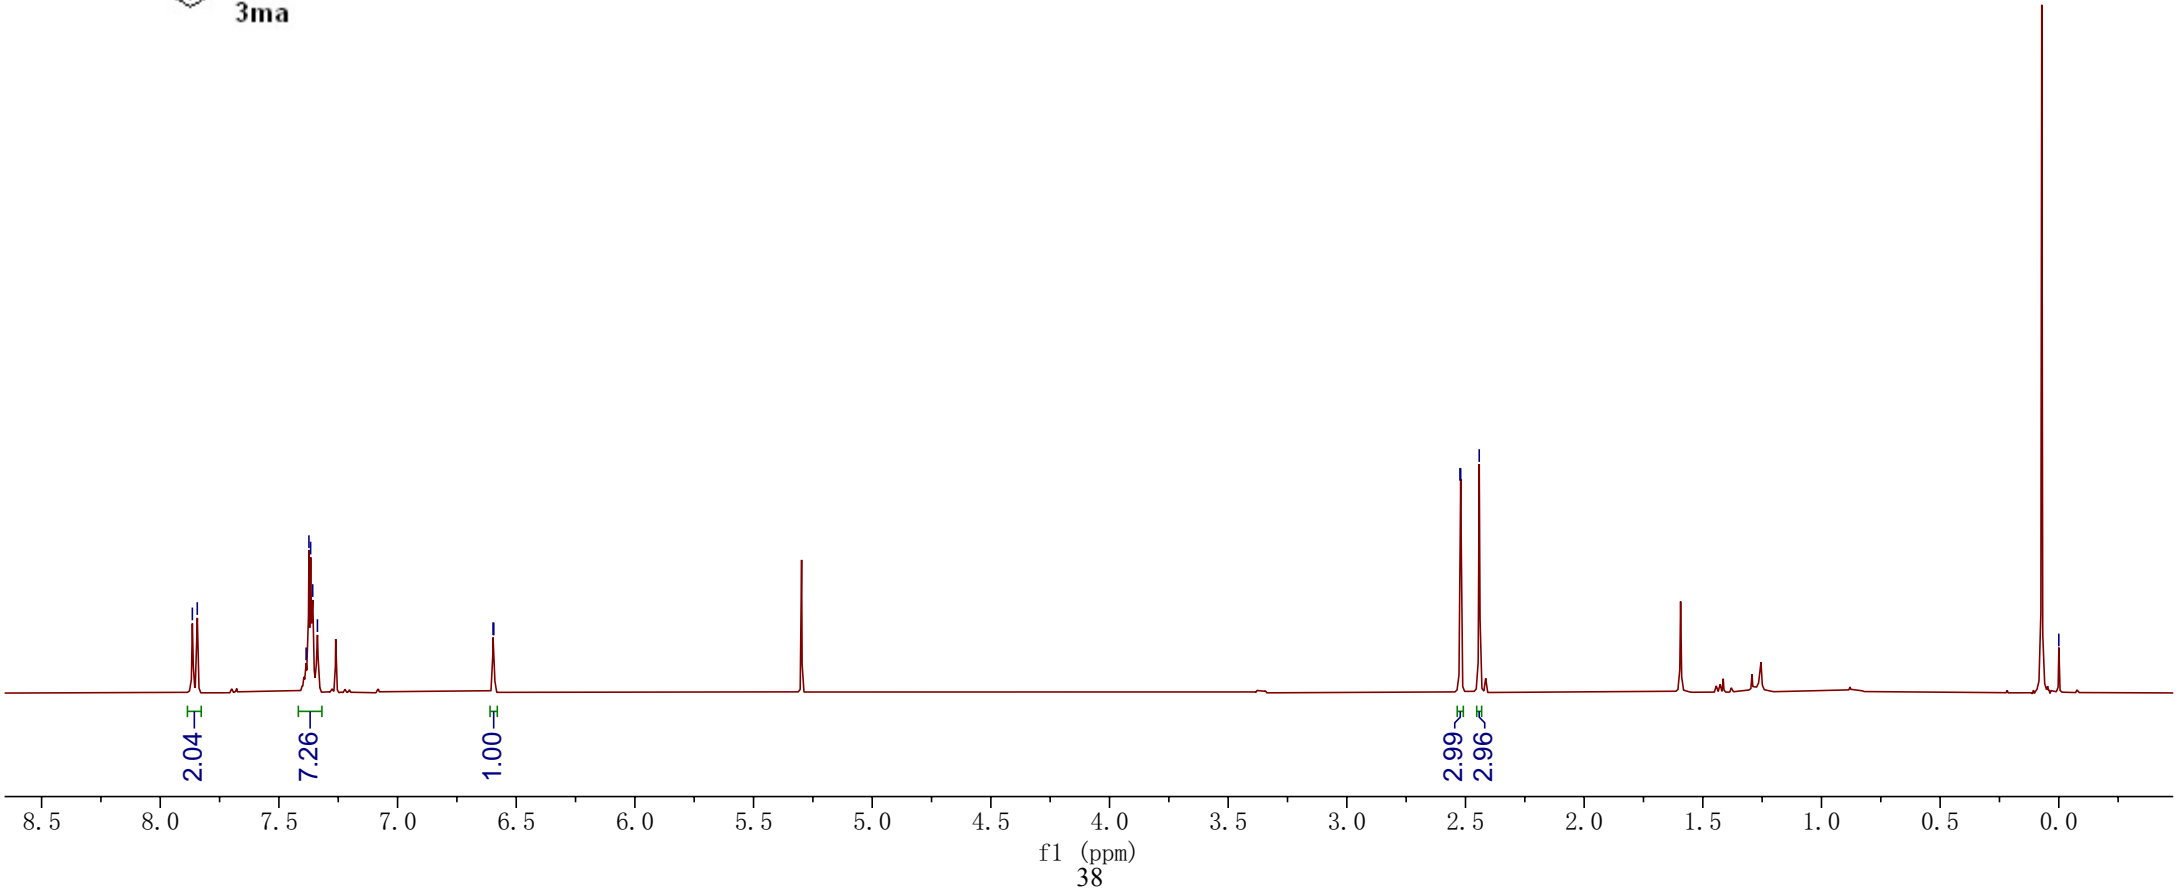

2.04

7.26

1.00

2.99

2.96

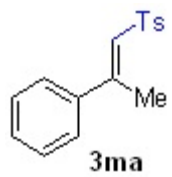

—144.28  
—140.41  
—134.77  
129.99  
129.94  
128.85  
128.02  
127.97  
127.45  
126.45

77.48  
77.16  
76.84

—21.75  
—17.31

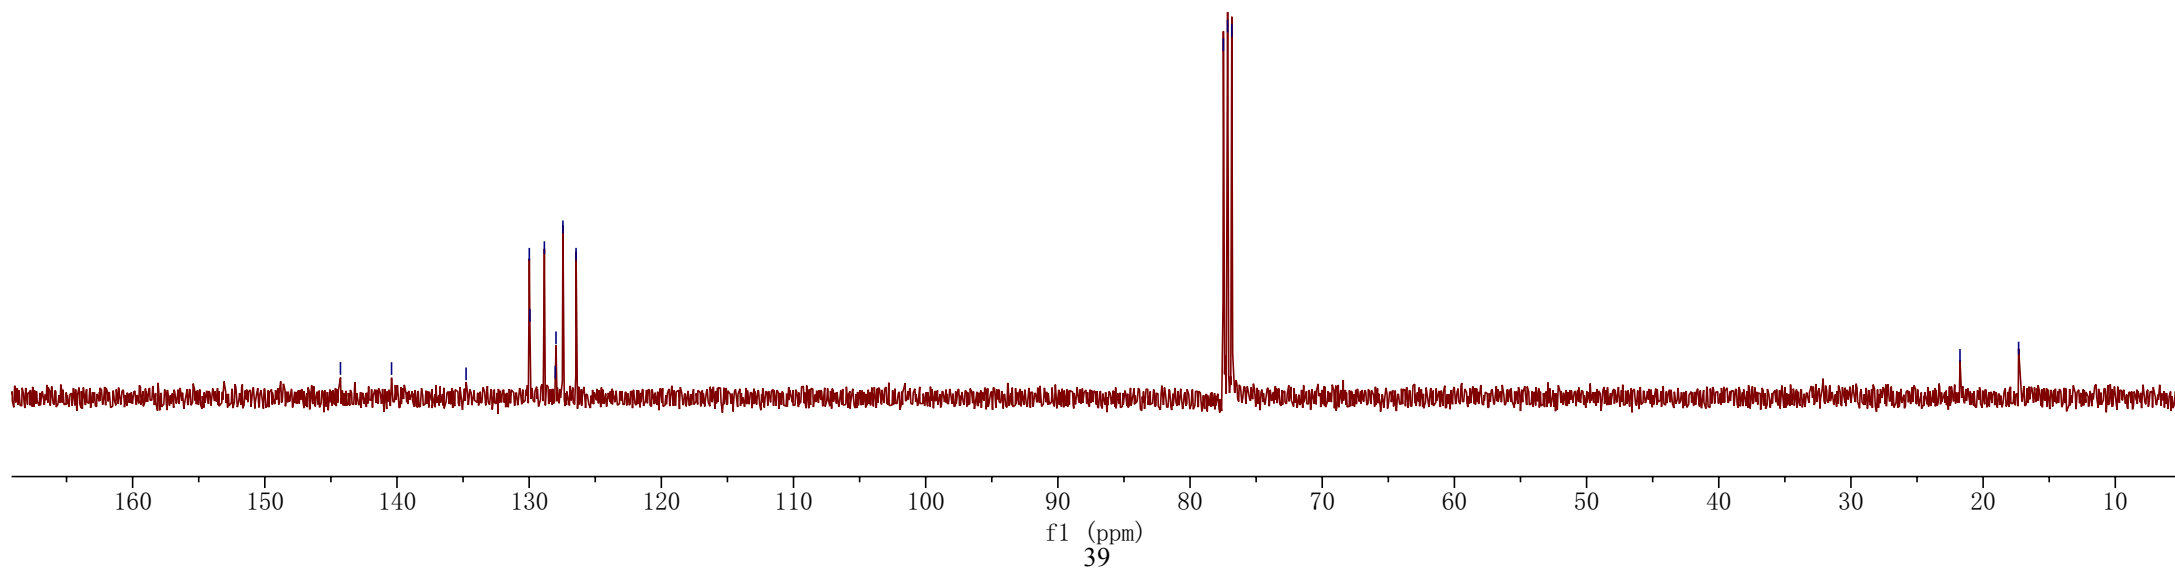

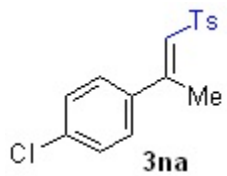

7.86  
7.84

7.37  
7.35  
7.32

6.59  
6.58

2.50  
2.50  
2.44

0.00

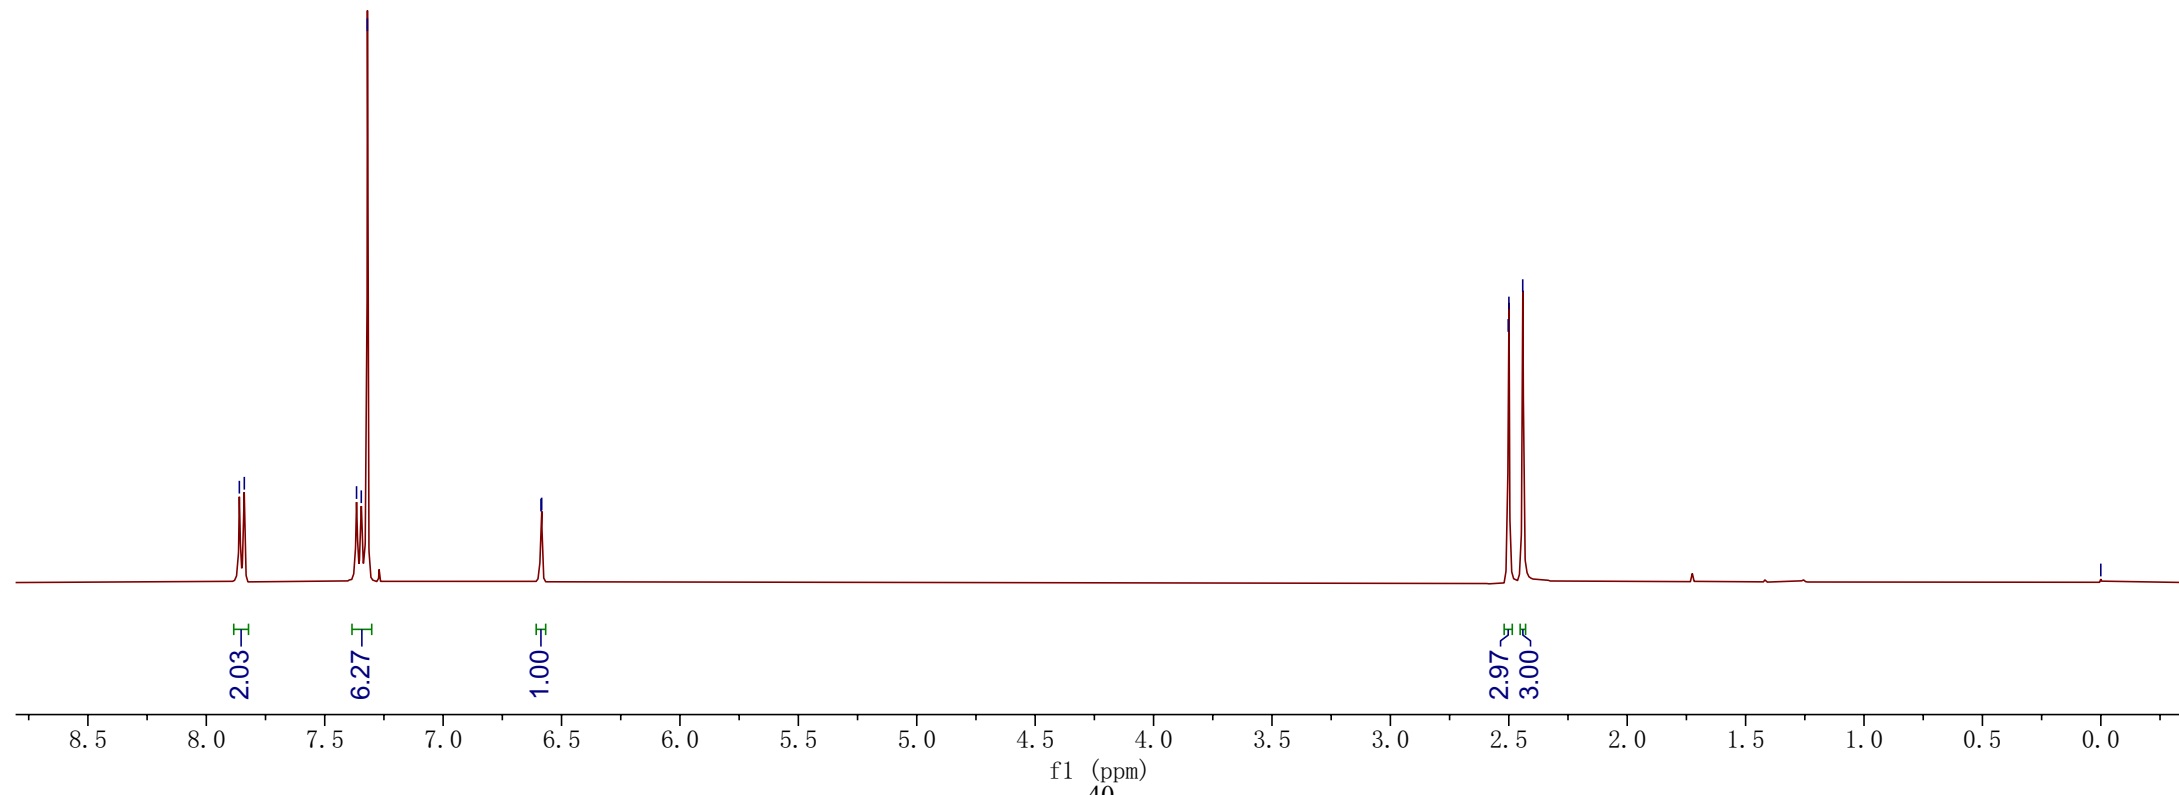

2.03

6.27

1.00

2.97

3.00

f1 (ppm)  
40



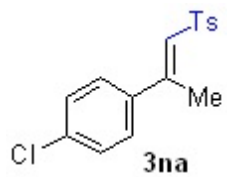

— 151.56

— 144.42

139.05

138.60

135.95

130.00

128.99

128.24

127.72

127.39

77.48

77.16

76.84

— 21.72

— 17.13

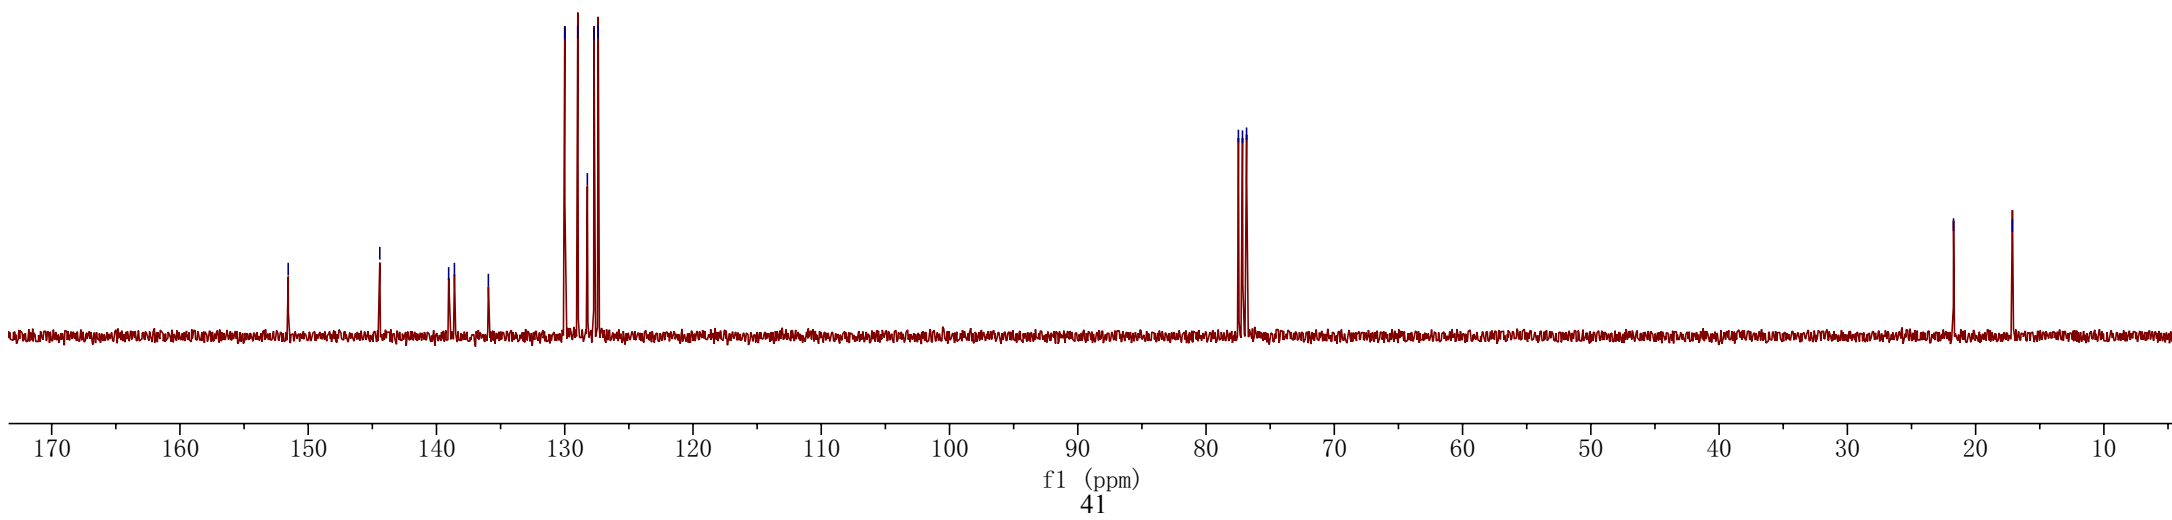

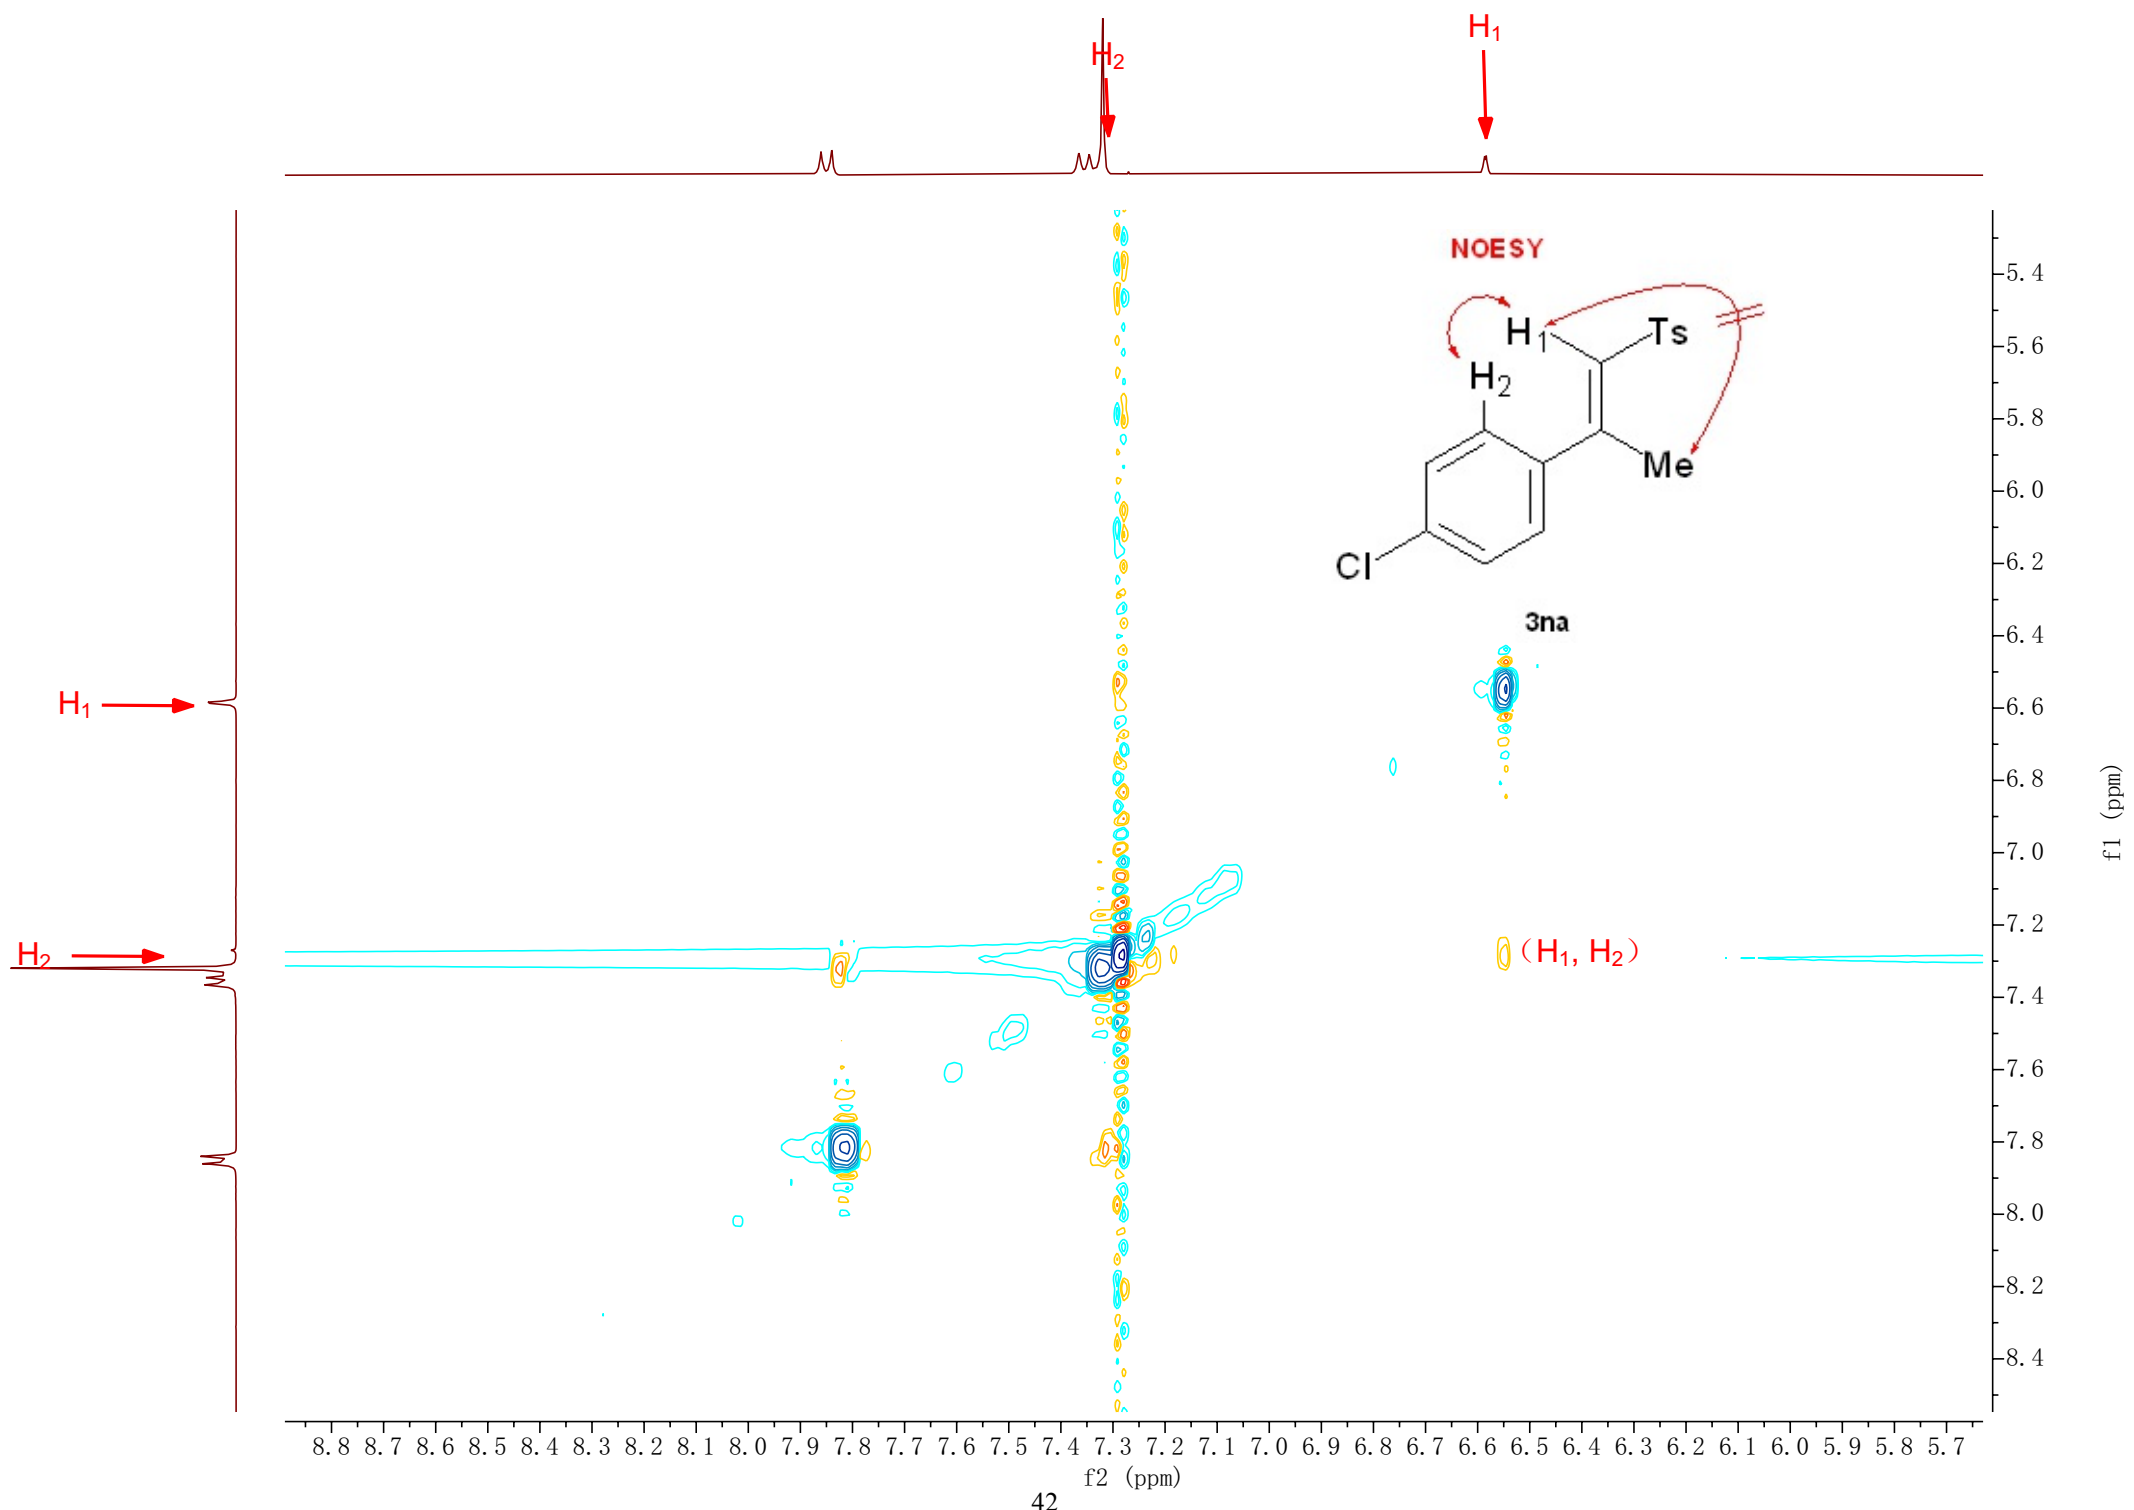

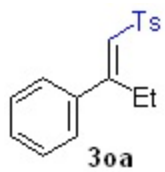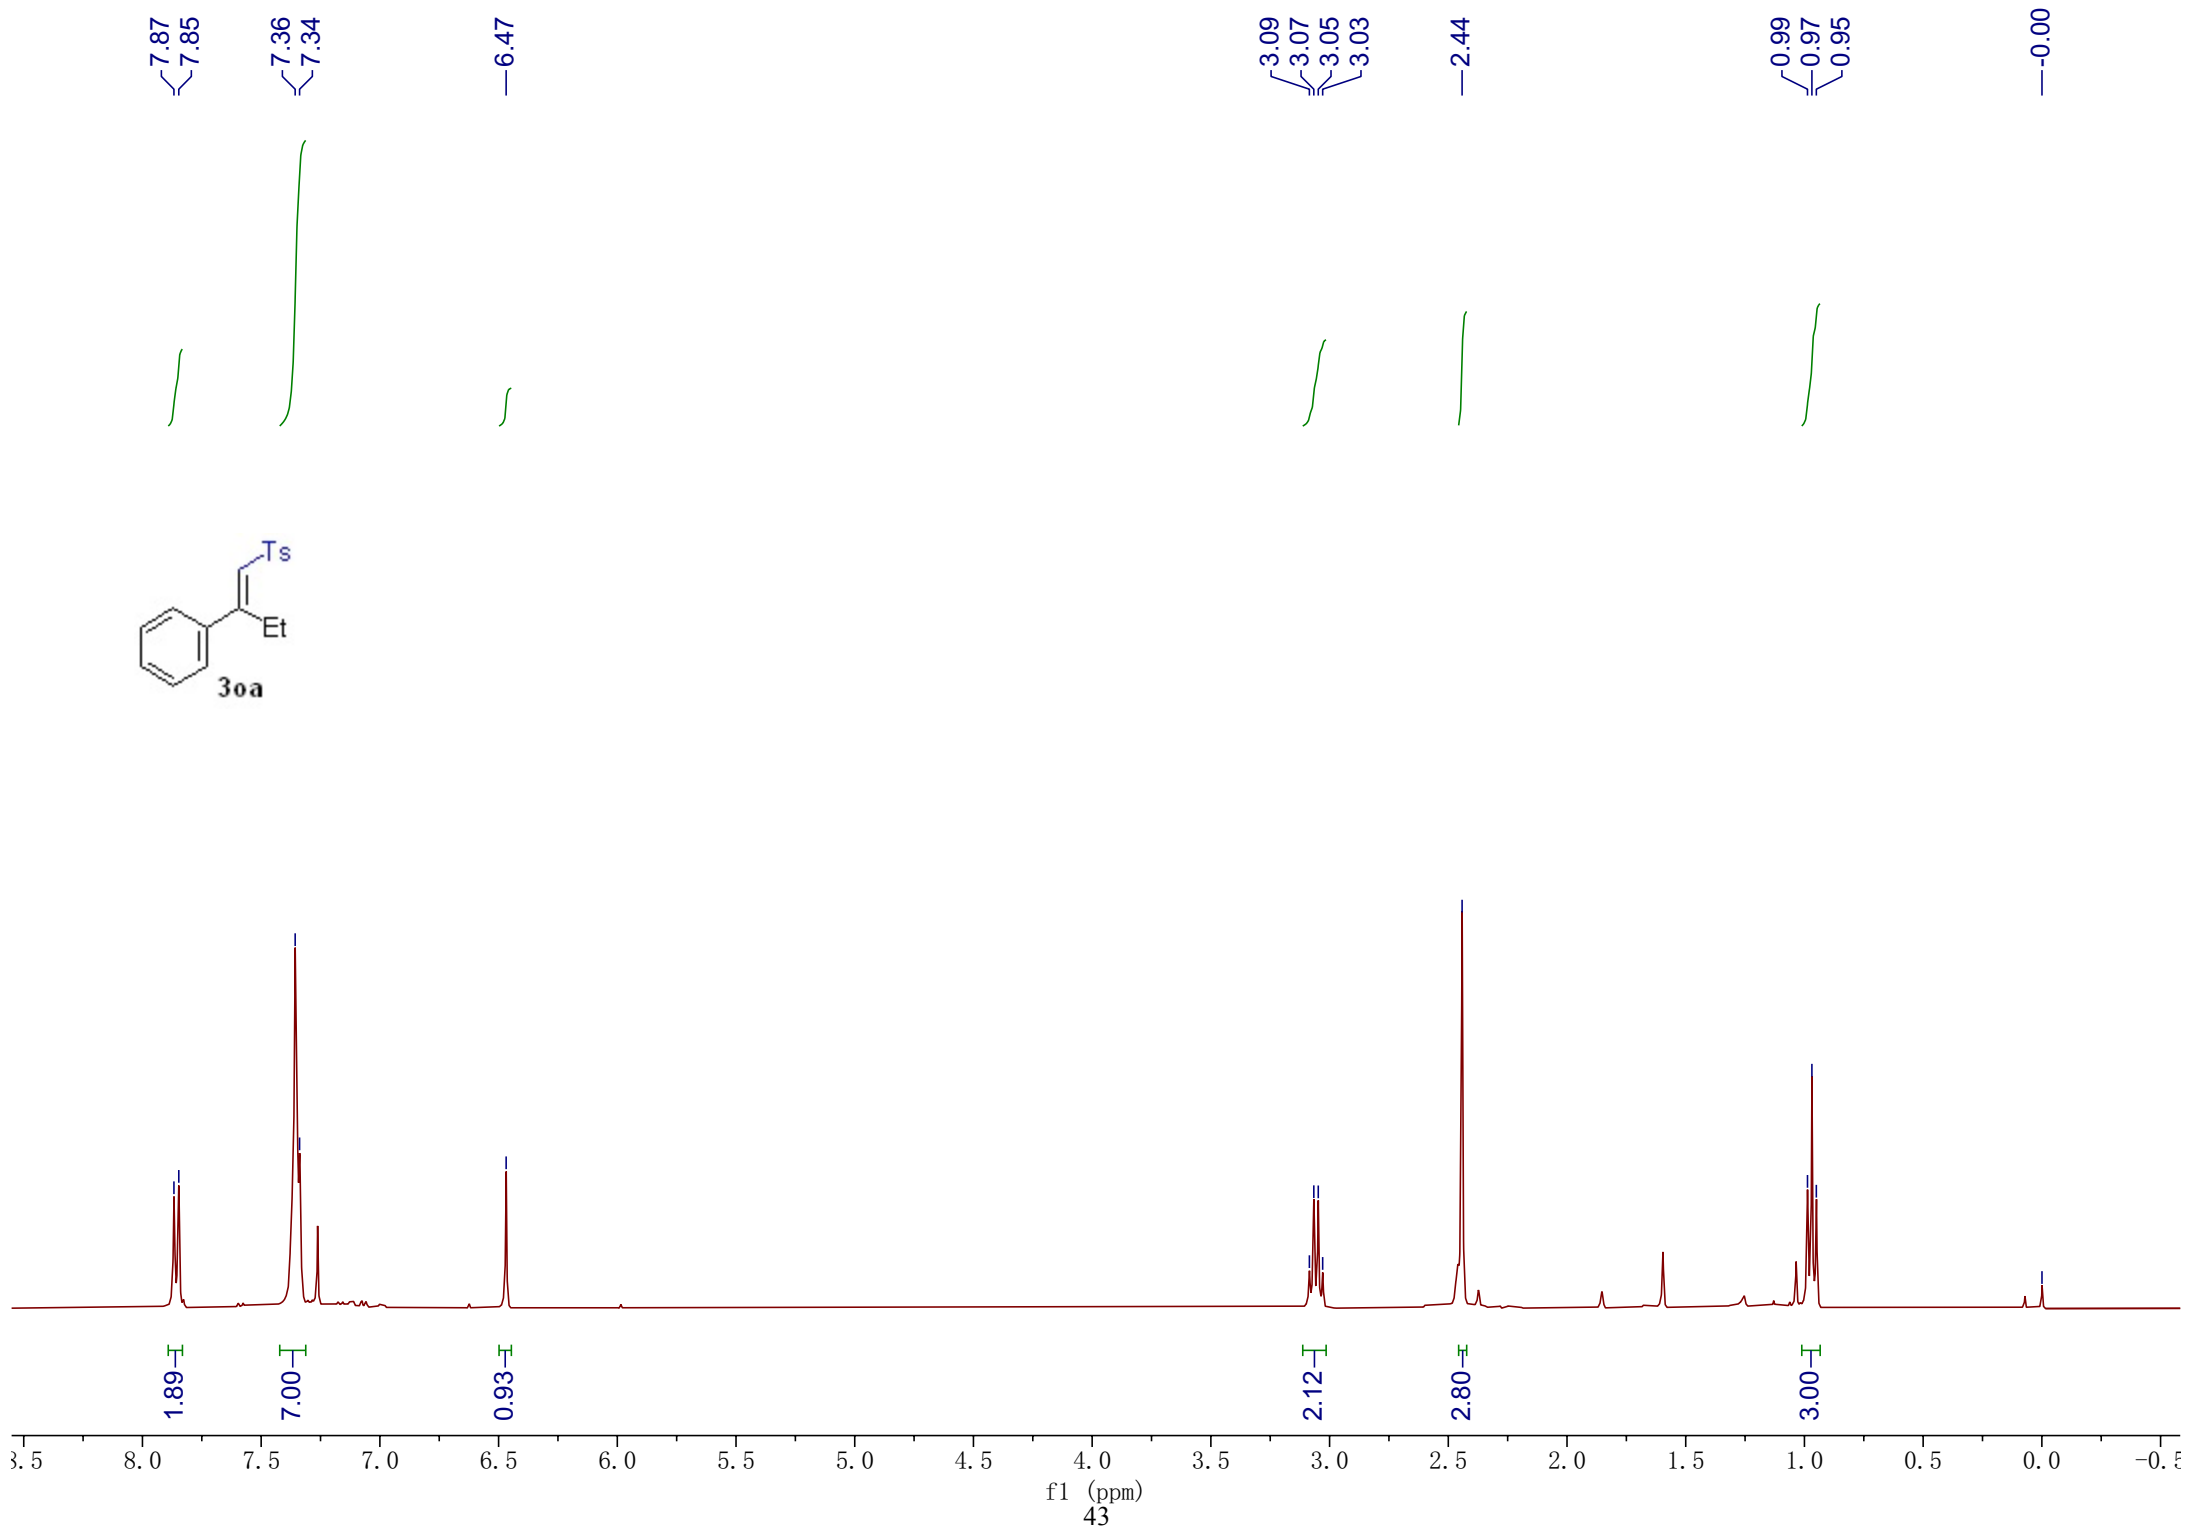

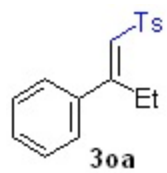

— 159.32

— 144.25  
— 139.54  
— 139.02

— 129.99  
— 129.76  
— 128.86  
— 127.56  
— 127.40  
— 126.91

— 77.48  
— 77.16  
— 76.84

— 23.78  
— 21.77

— 13.24

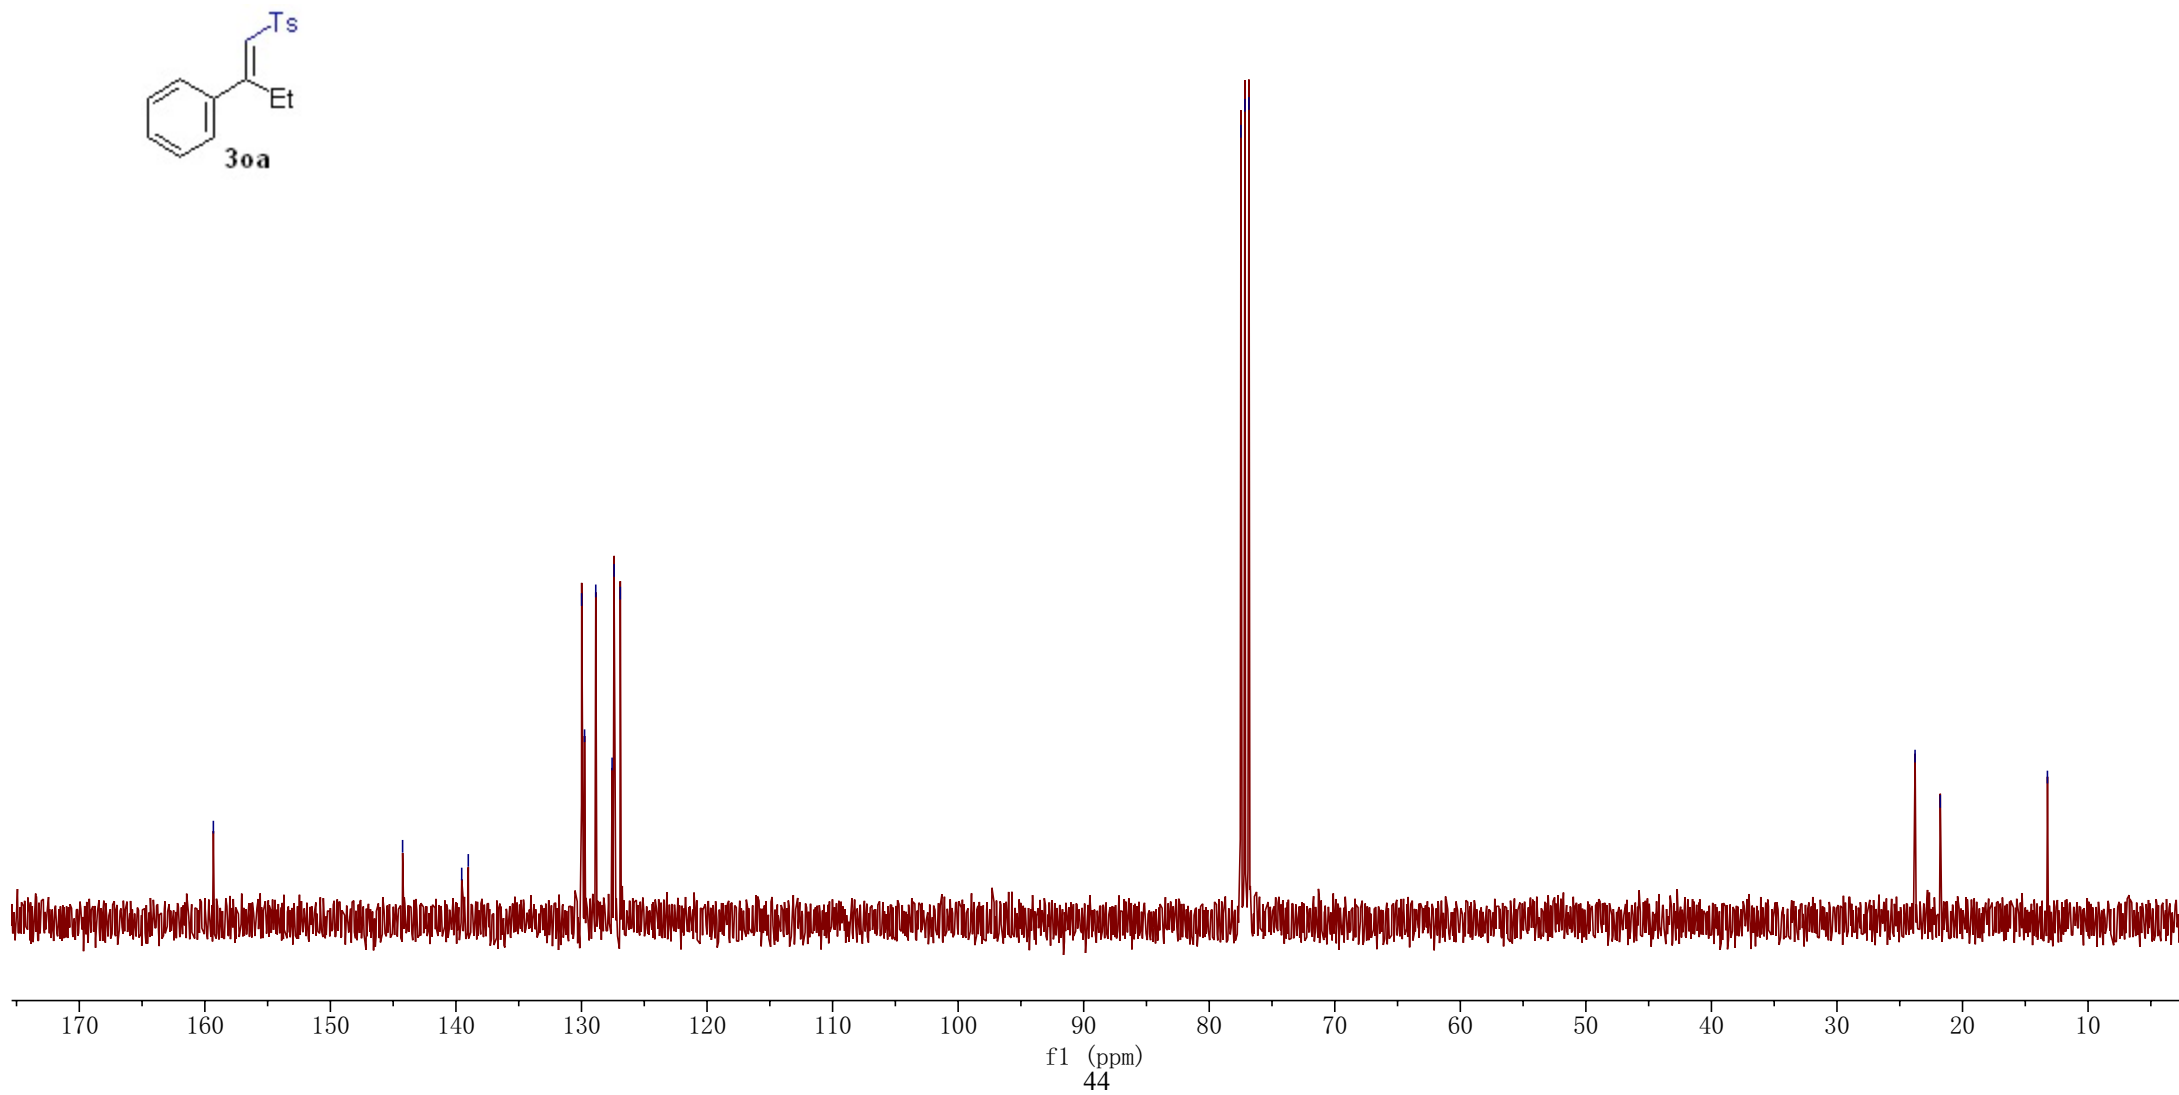

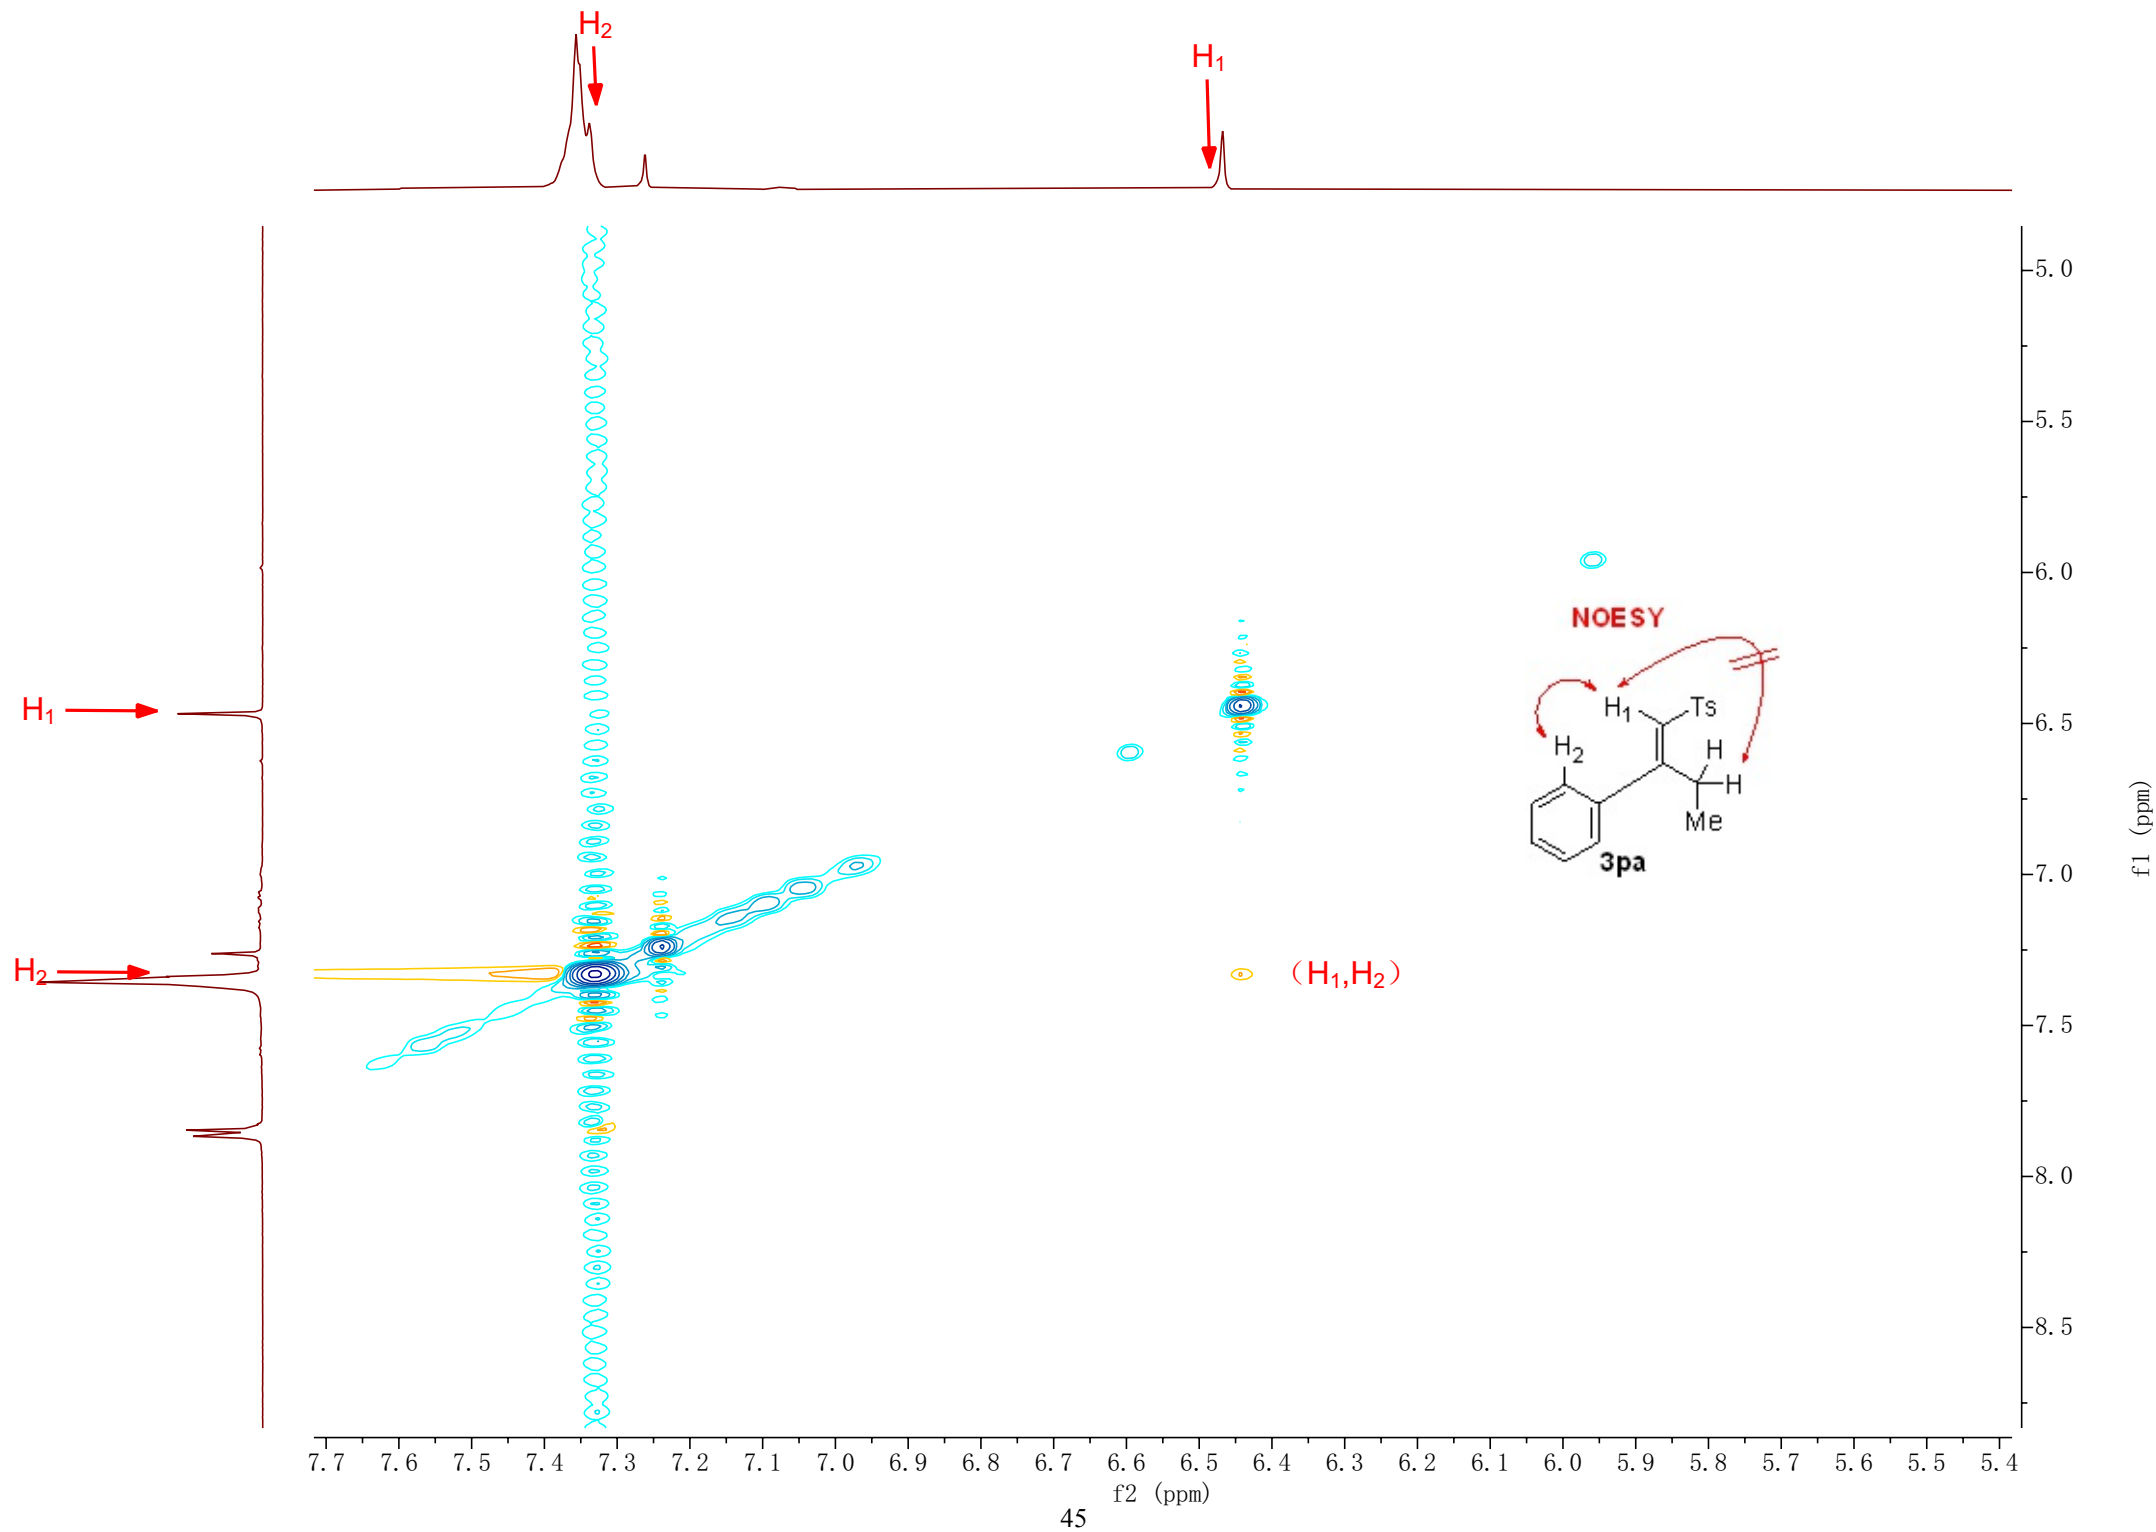

7.34  
7.31  
7.30  
7.28  
7.26  
7.24  
7.22  
7.20  
7.10  
7.08  
6.92  
6.90  
— 6.46

2.36  
2.17  
2.14  
2.12  
1.74  
1.72  
1.65  
1.62  
1.24  
1.21  
1.17  
1.14  
1.13  
1.11  
1.08  
1.08

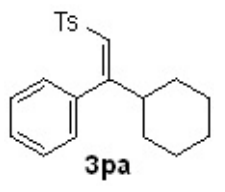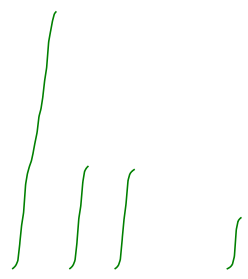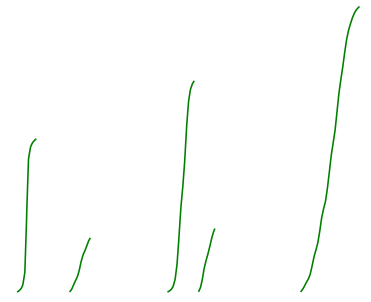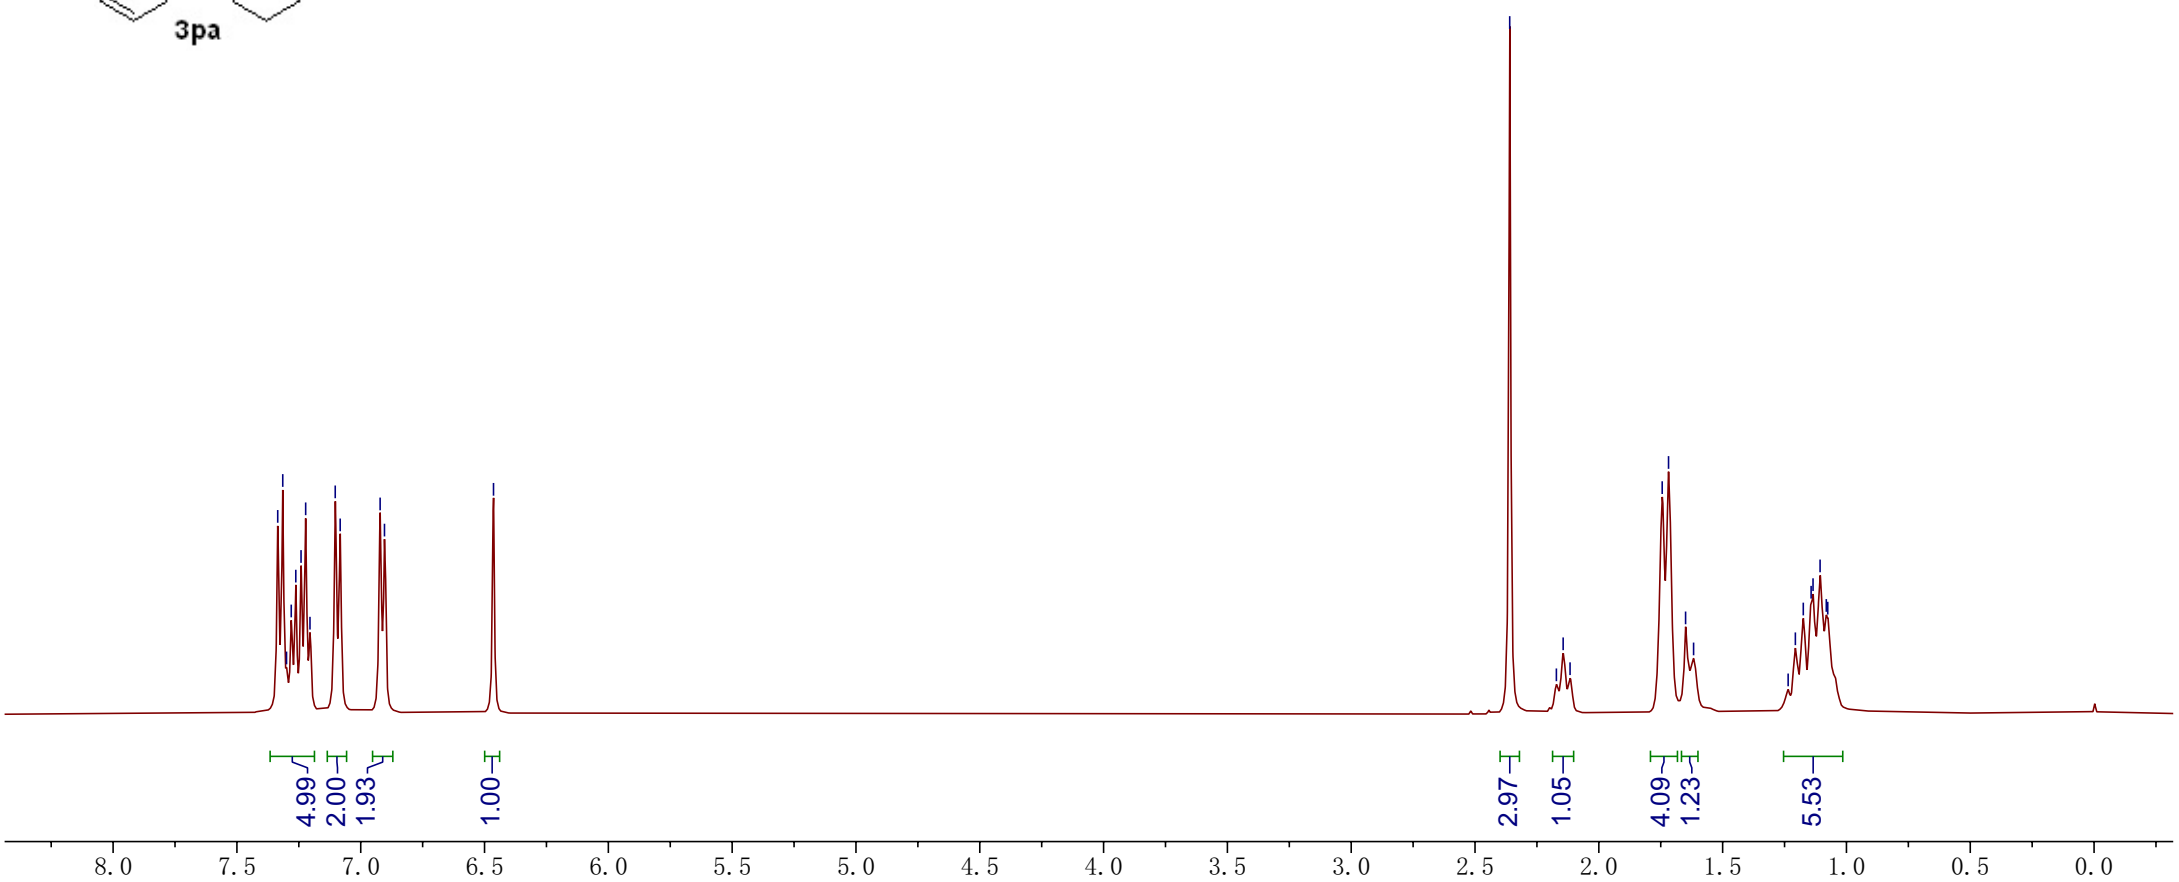

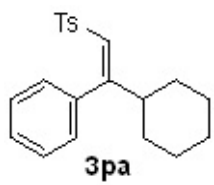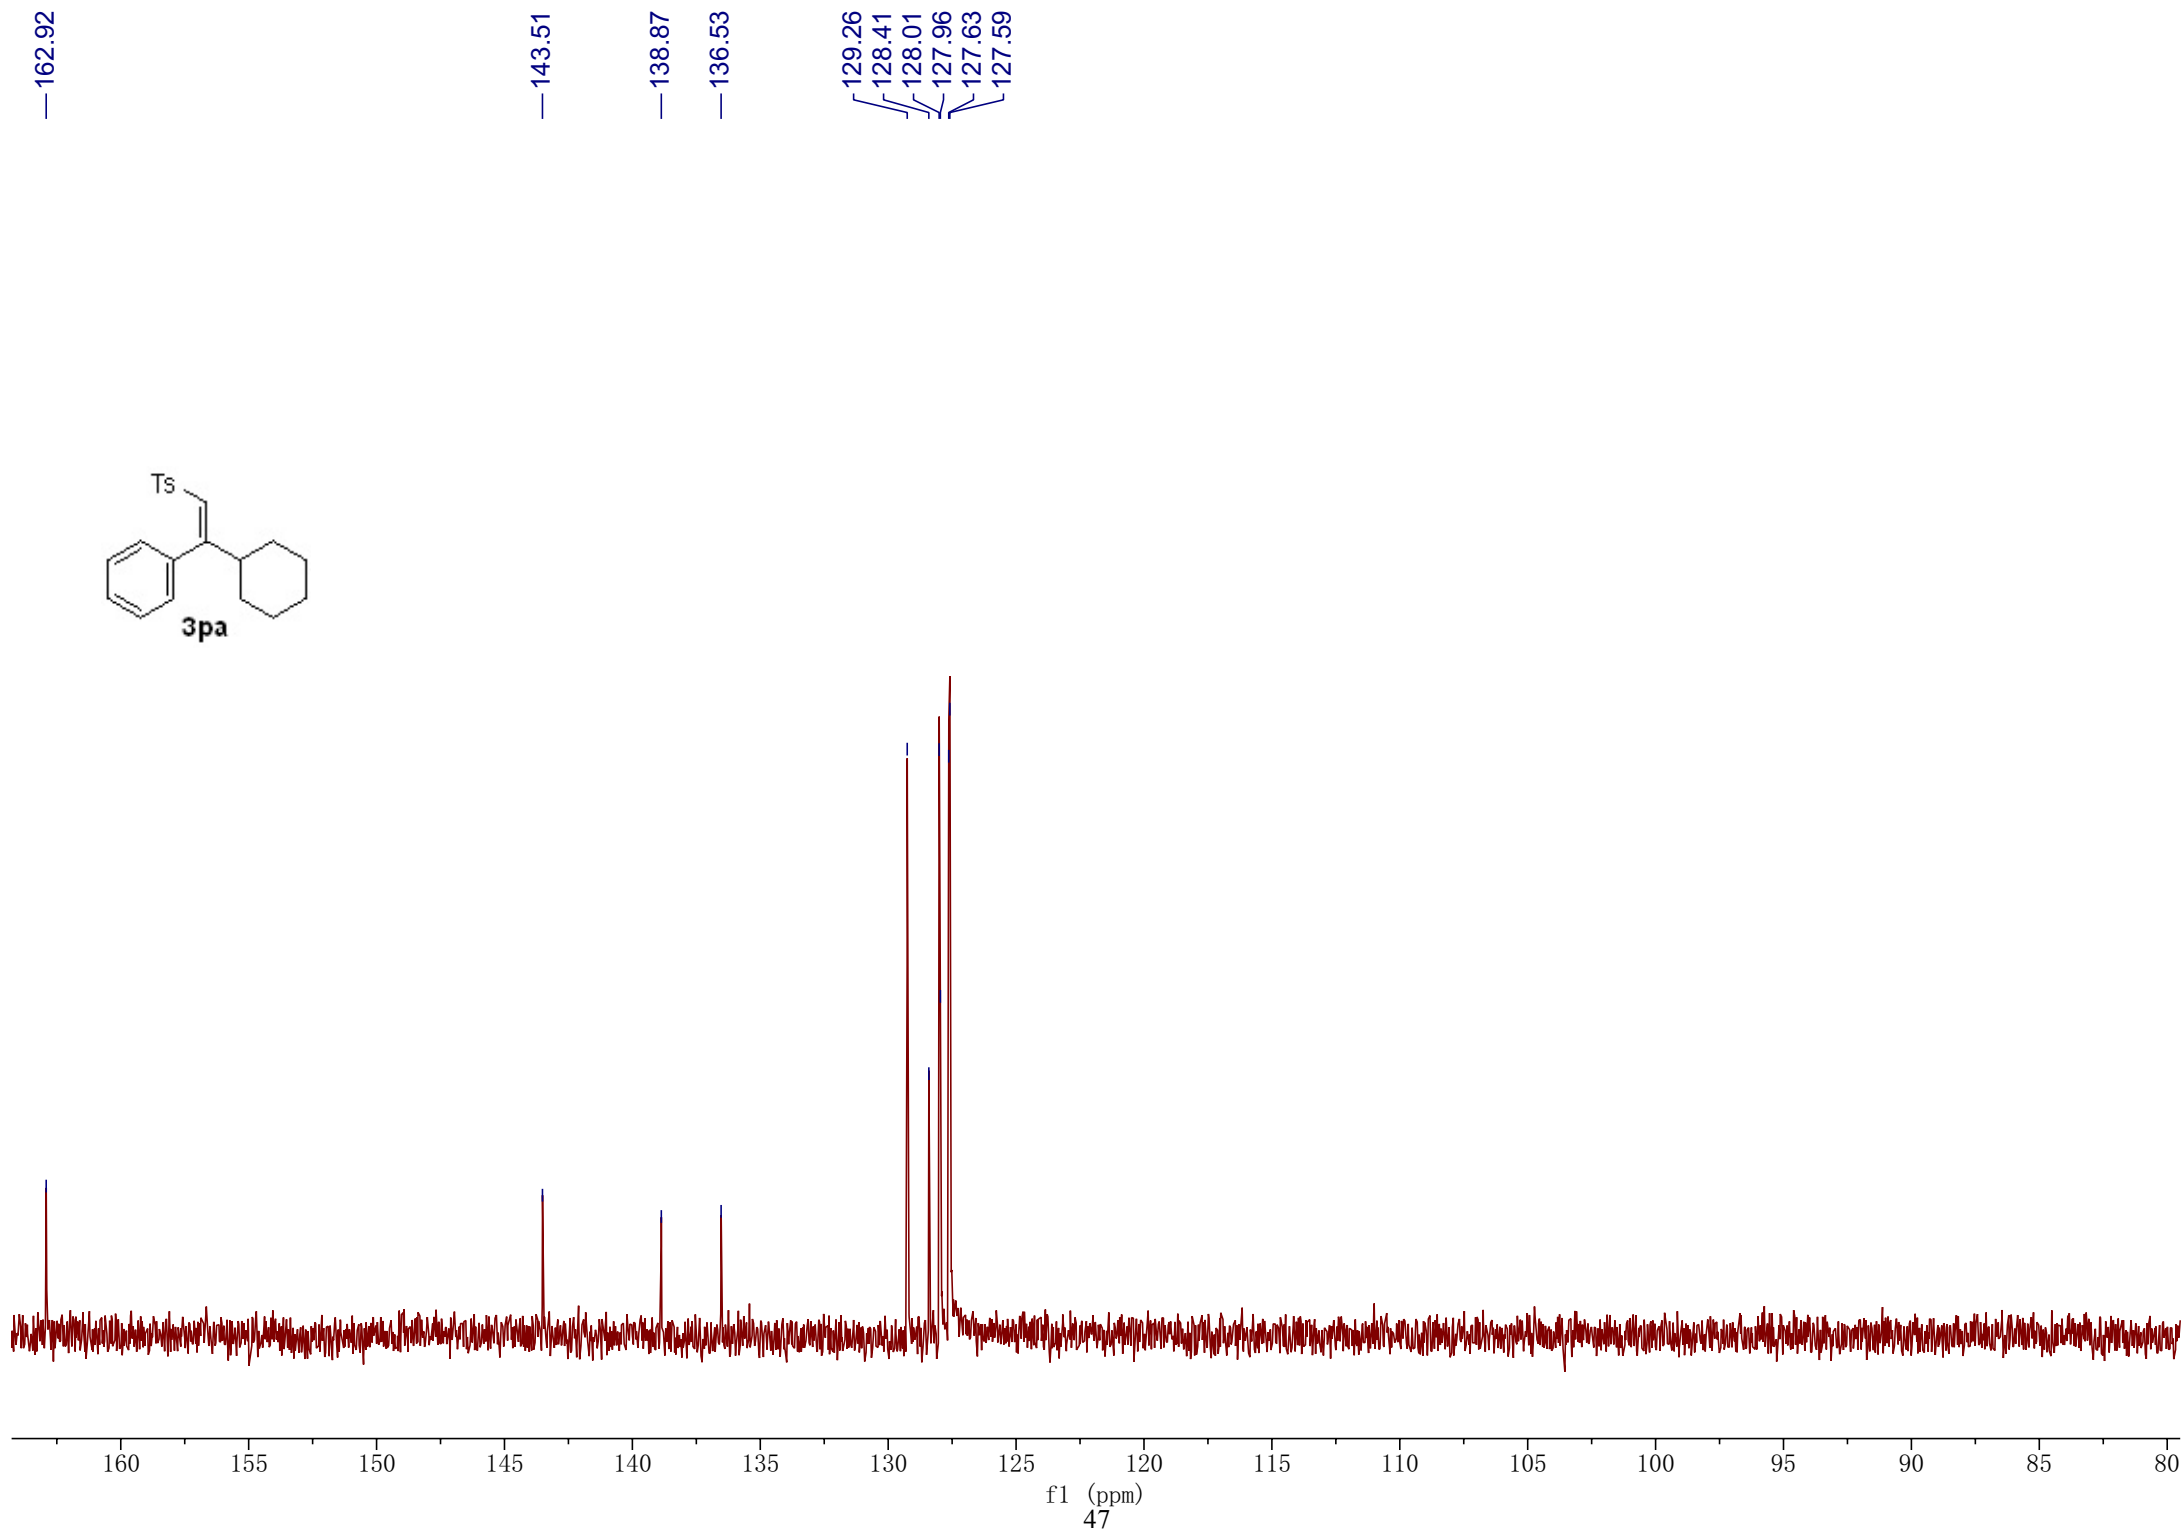

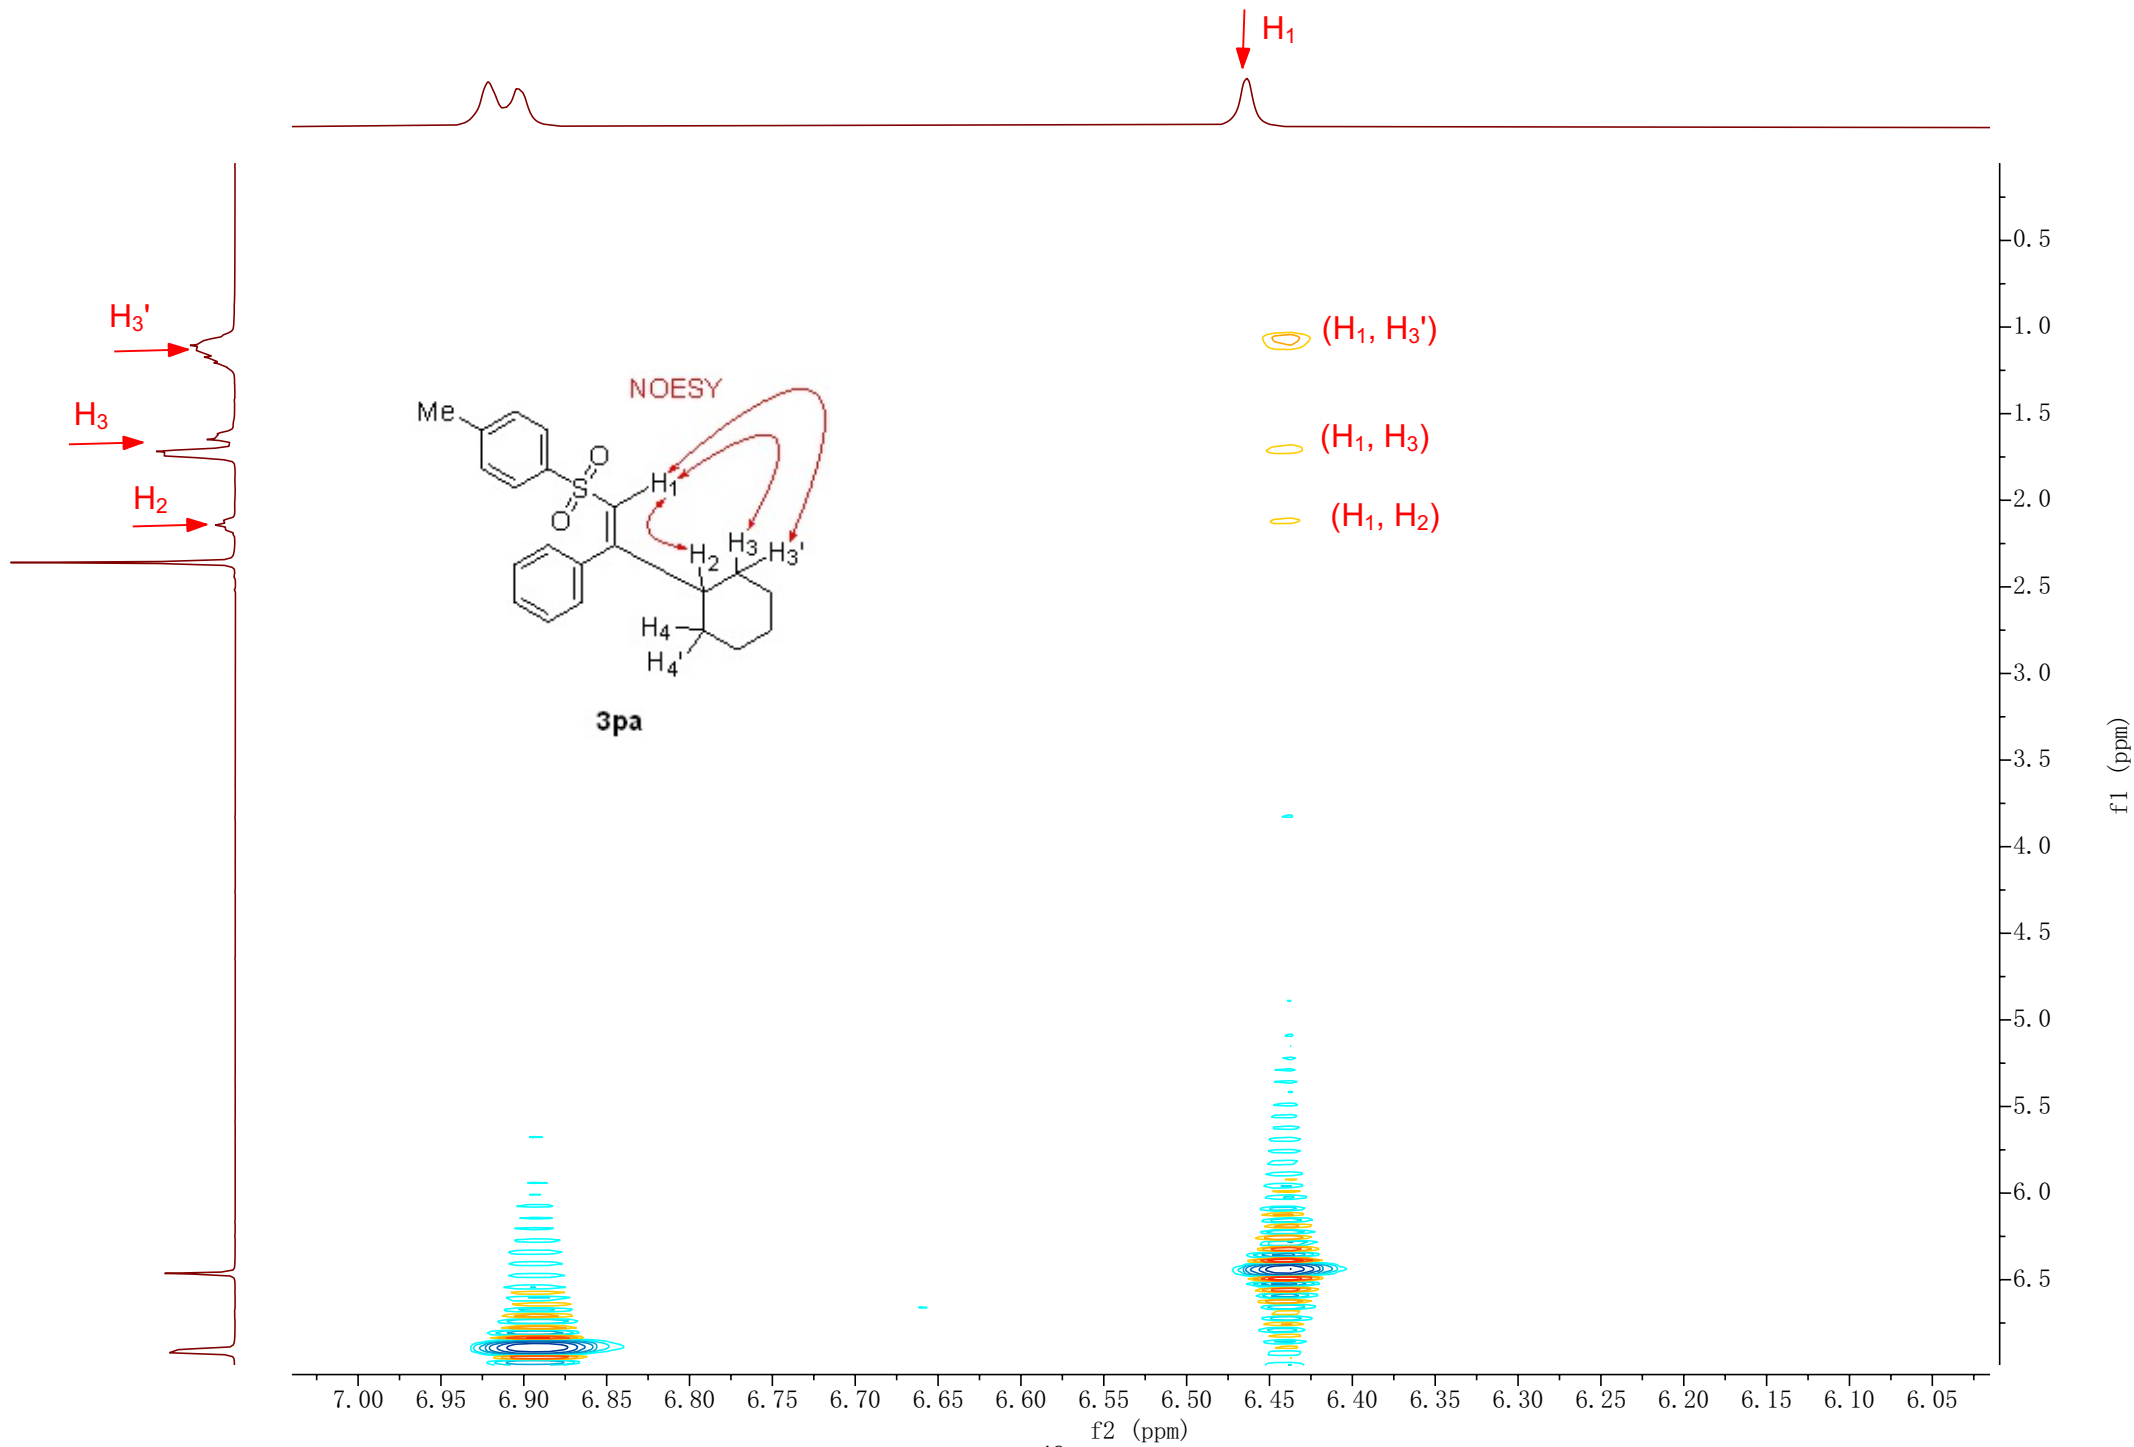



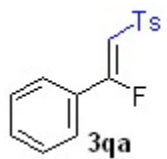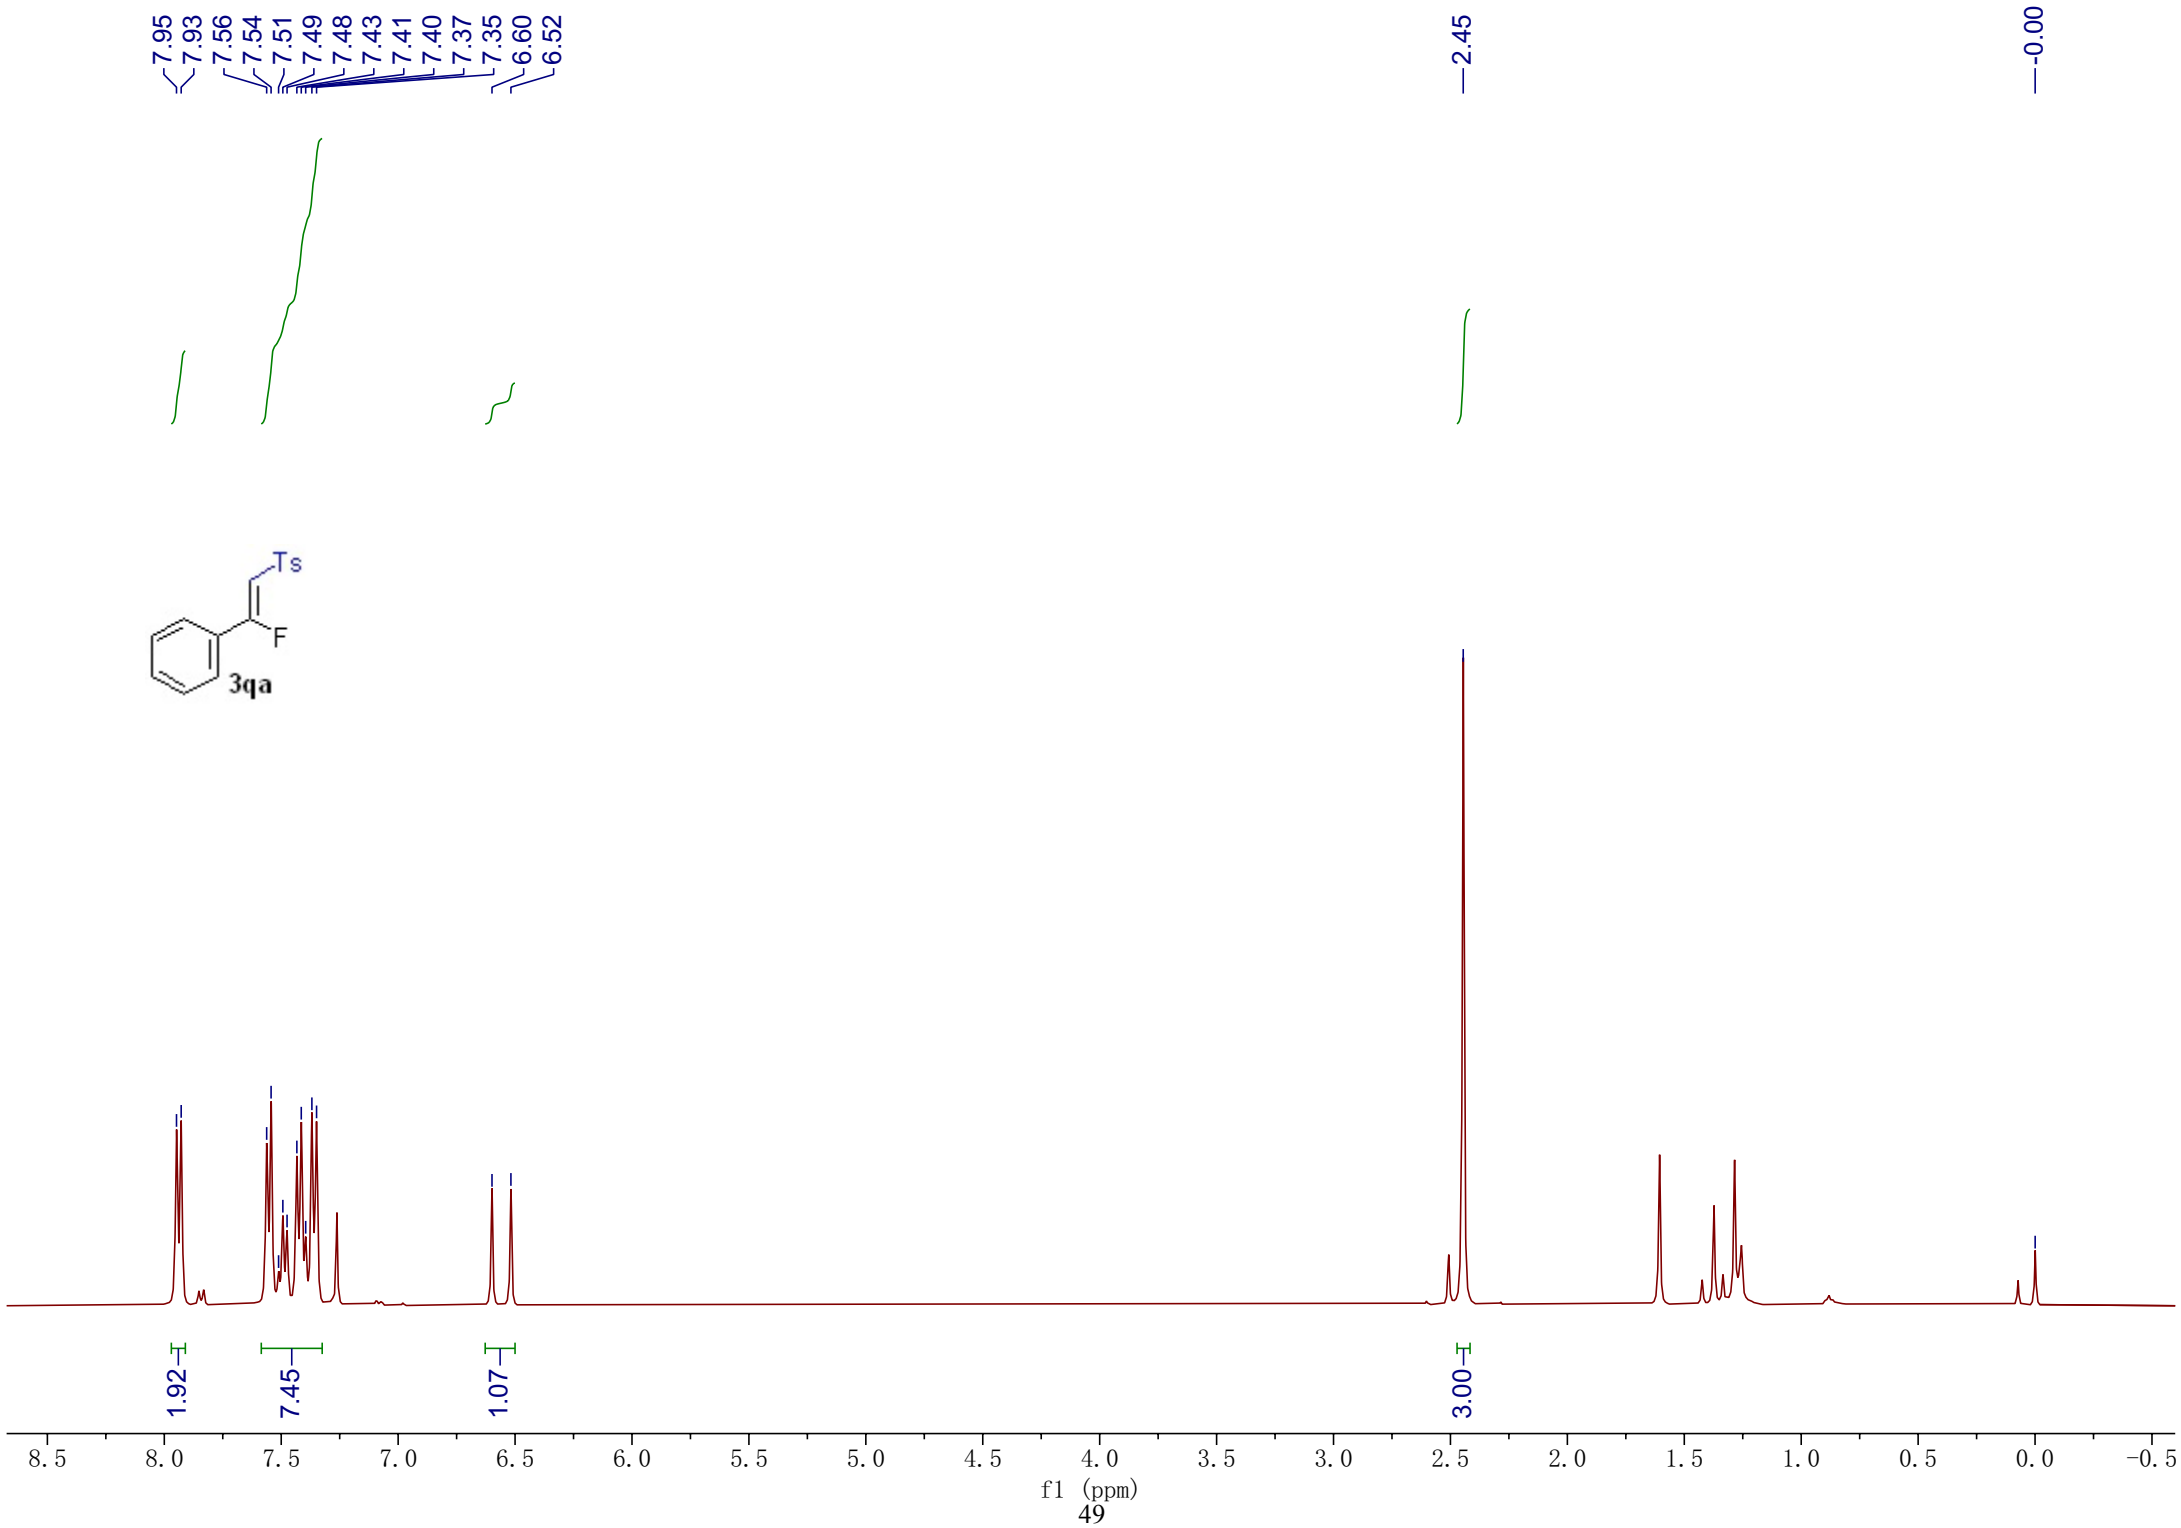

—162.76

—144.73

132.51

129.94

129.14

129.12

127.82

127.81

126.05

125.98

109.99

109.87

77.48

77.16

76.84

—21.79

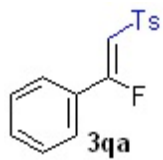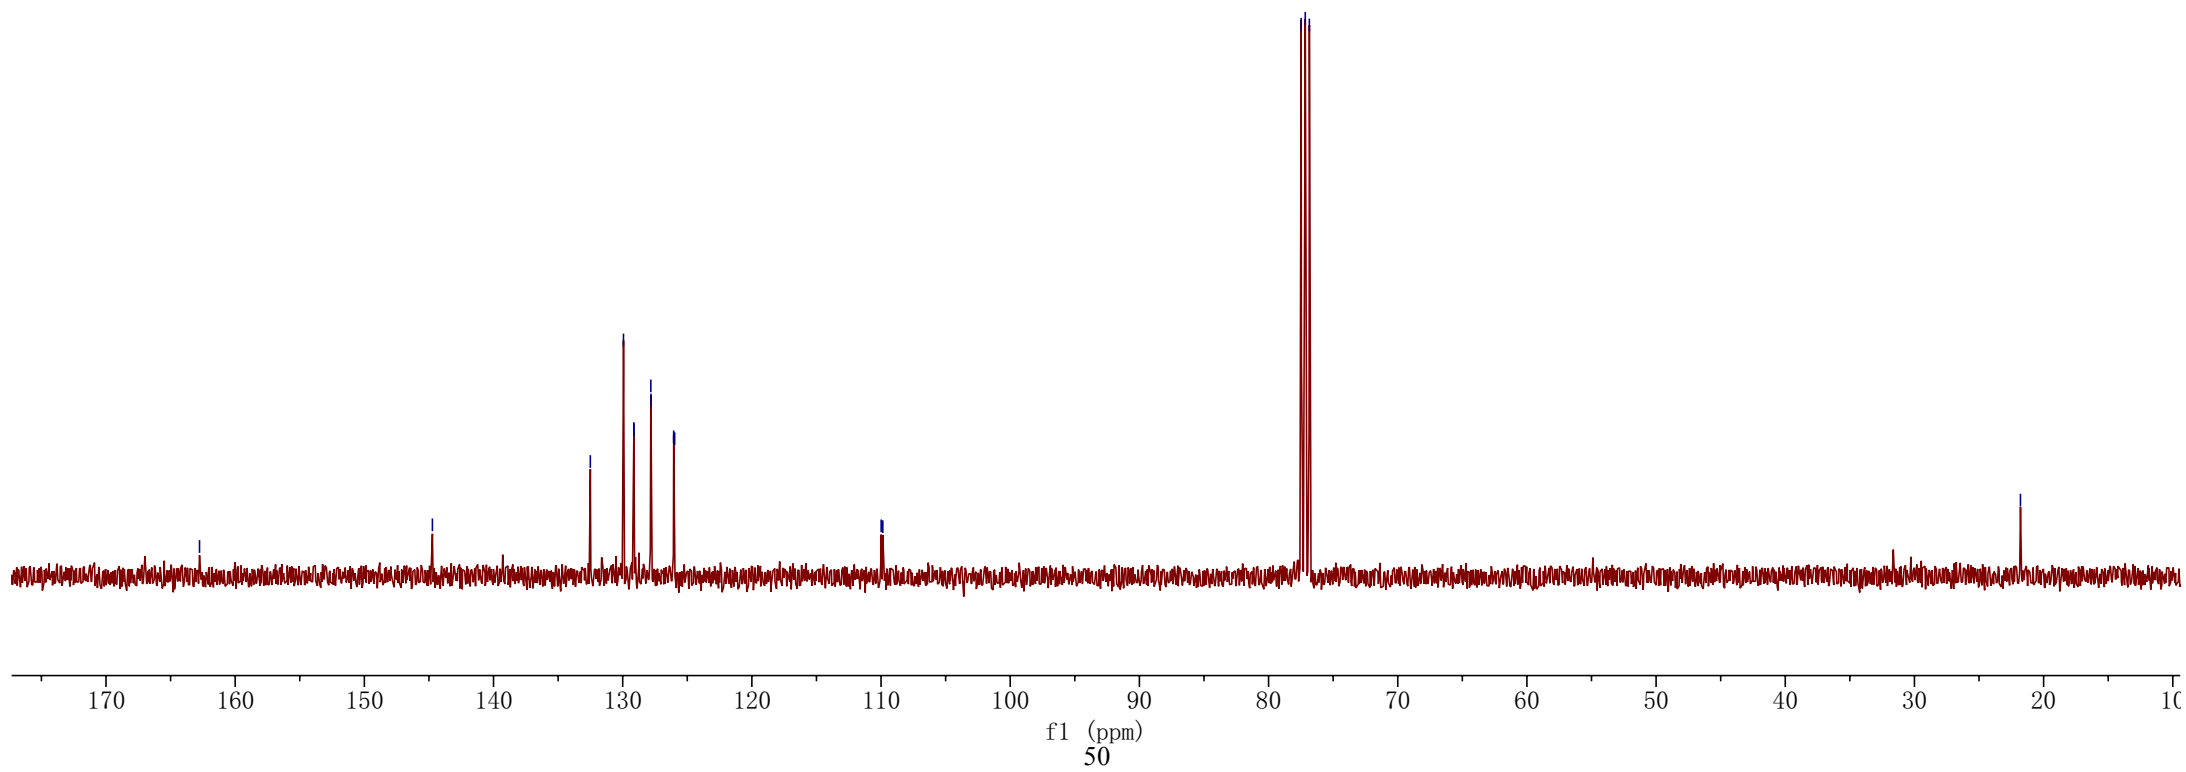

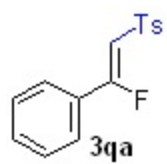

-93.431  
-93.517

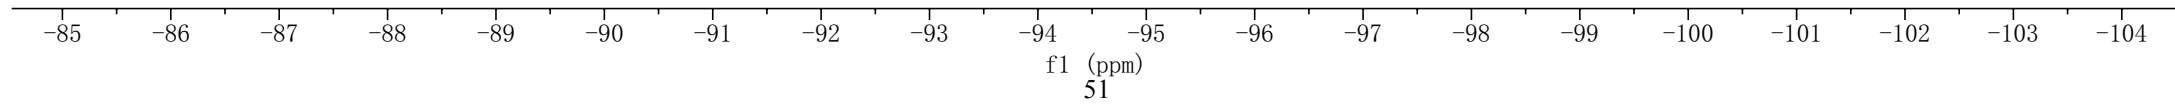

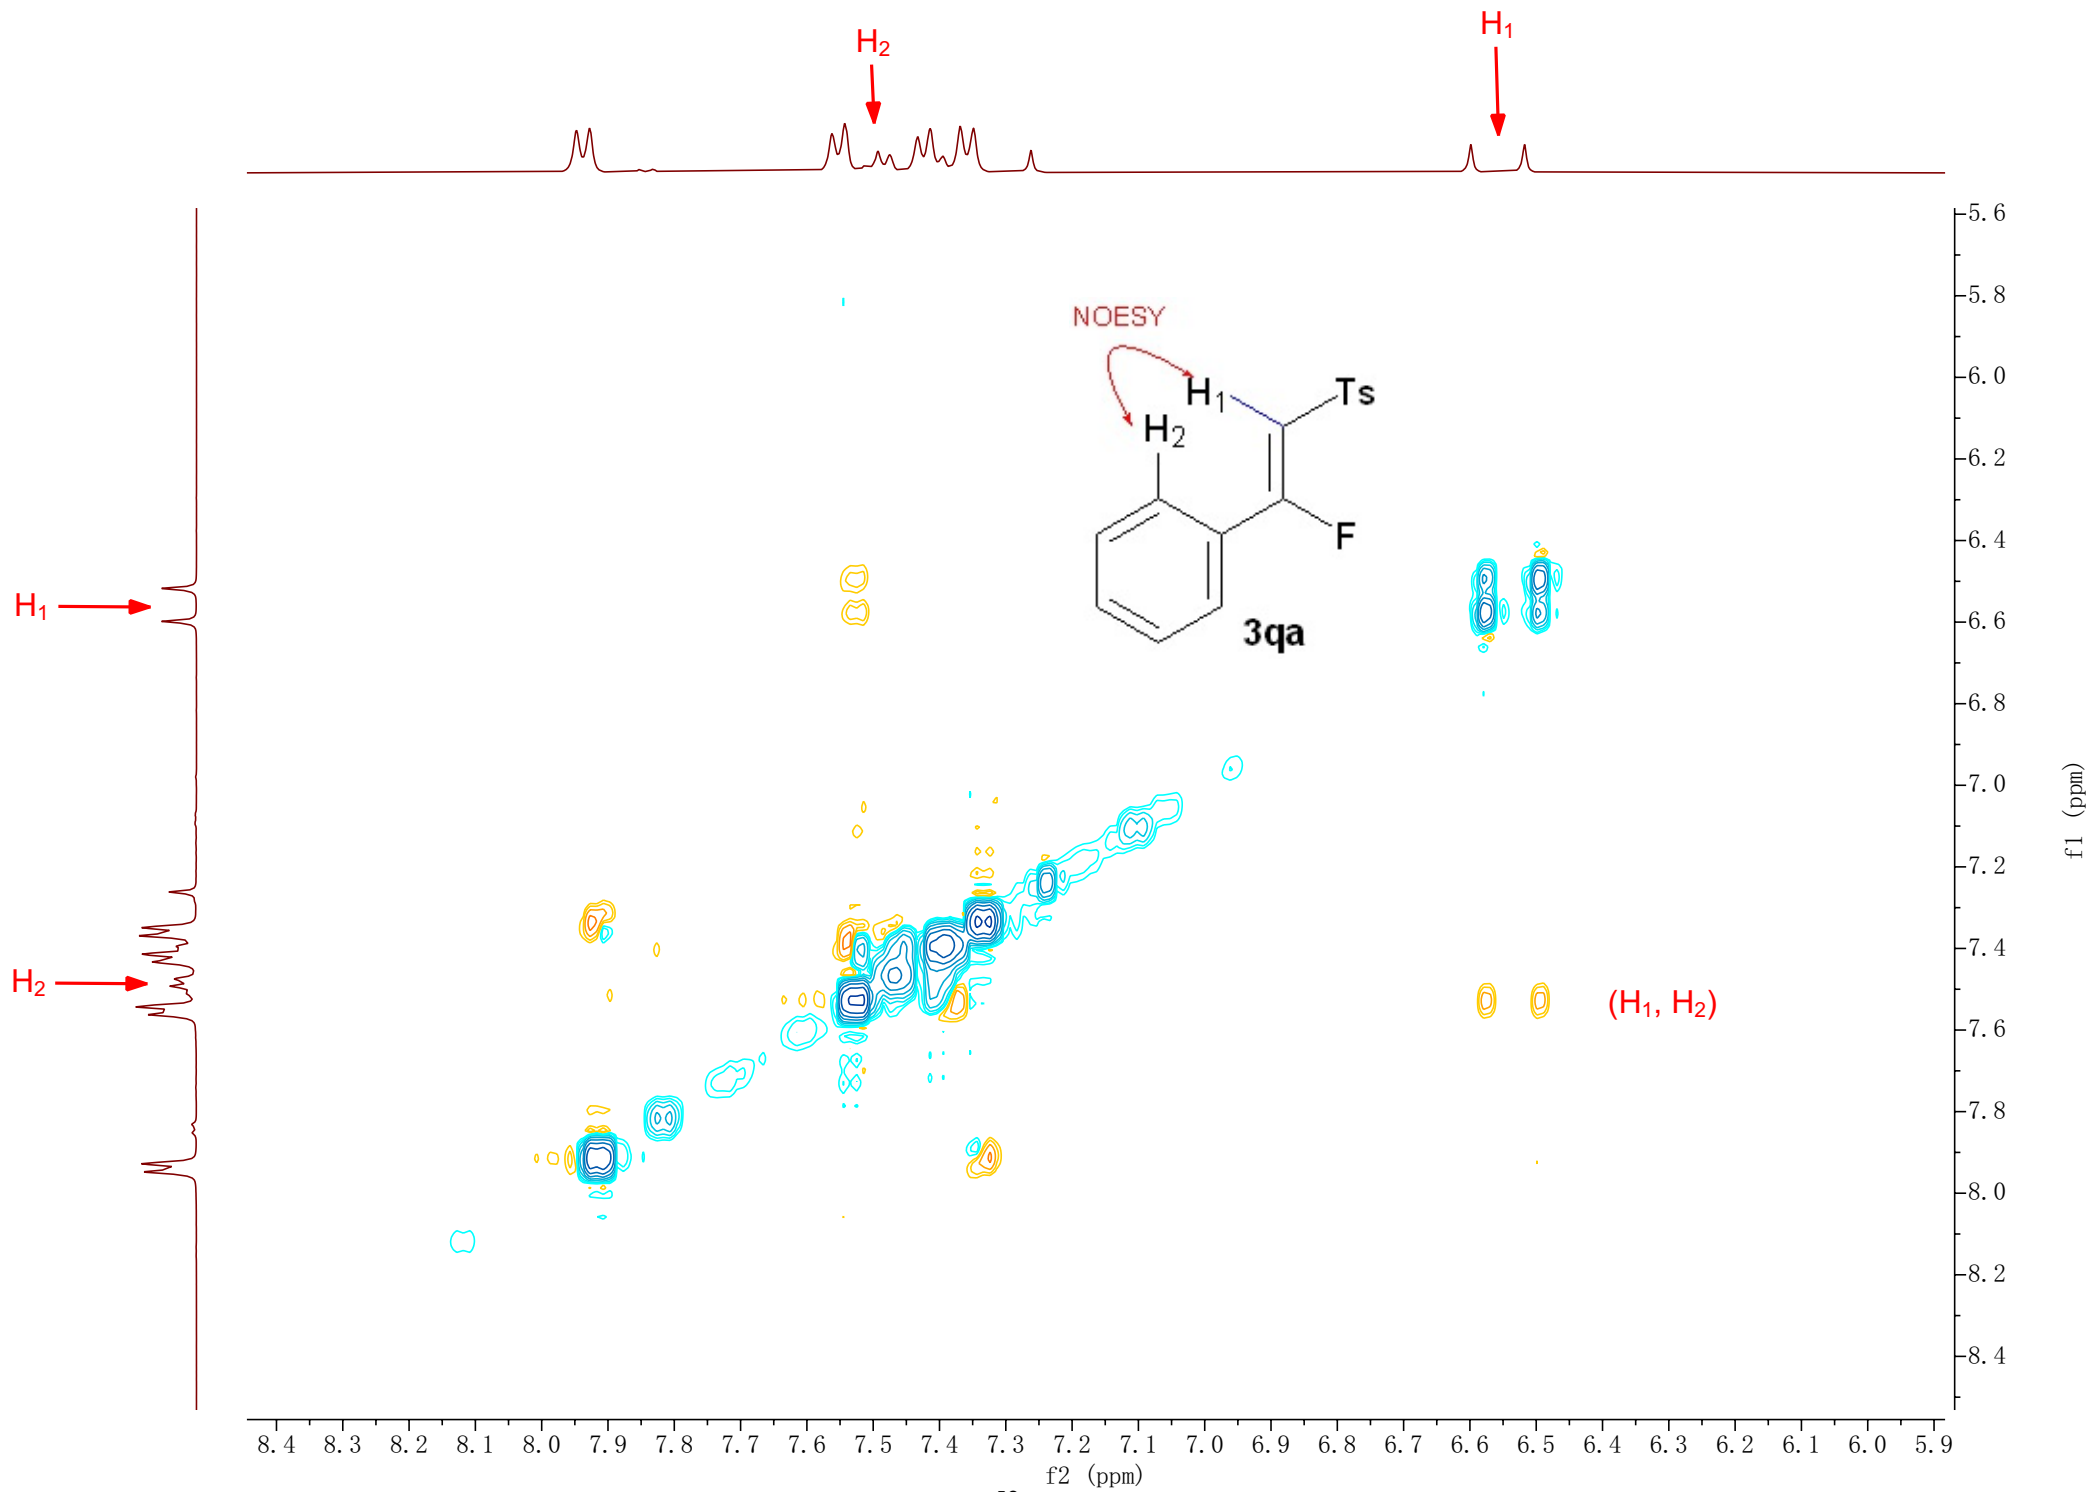

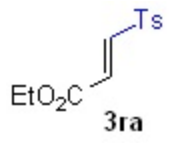

7.81  
7.79  
7.40  
7.38  
7.34  
7.30  
7.27  
6.82  
6.78

4.27  
4.26  
4.24  
4.22

2.47

1.32  
1.30  
1.29

0.00

1.84

3.20

0.89

2.06

3.00

3.31

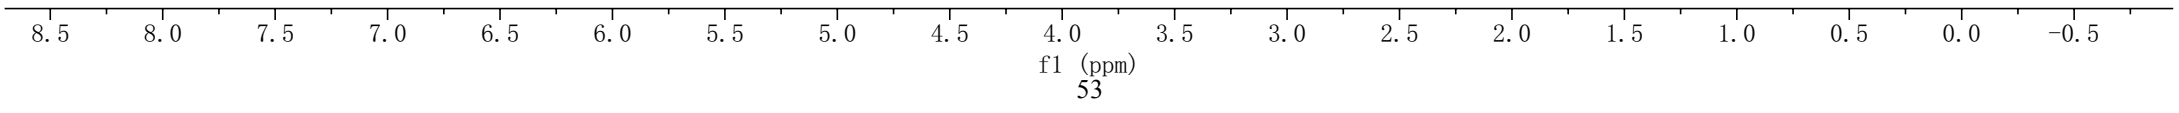

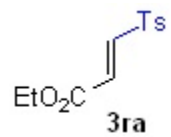

— 163.66      — 145.79      — 143.54      — 135.50      — 130.61      — 130.40      — 128.52      — 77.48      — 77.16      — 76.84      — 62.14      — 21.88      — 14.17

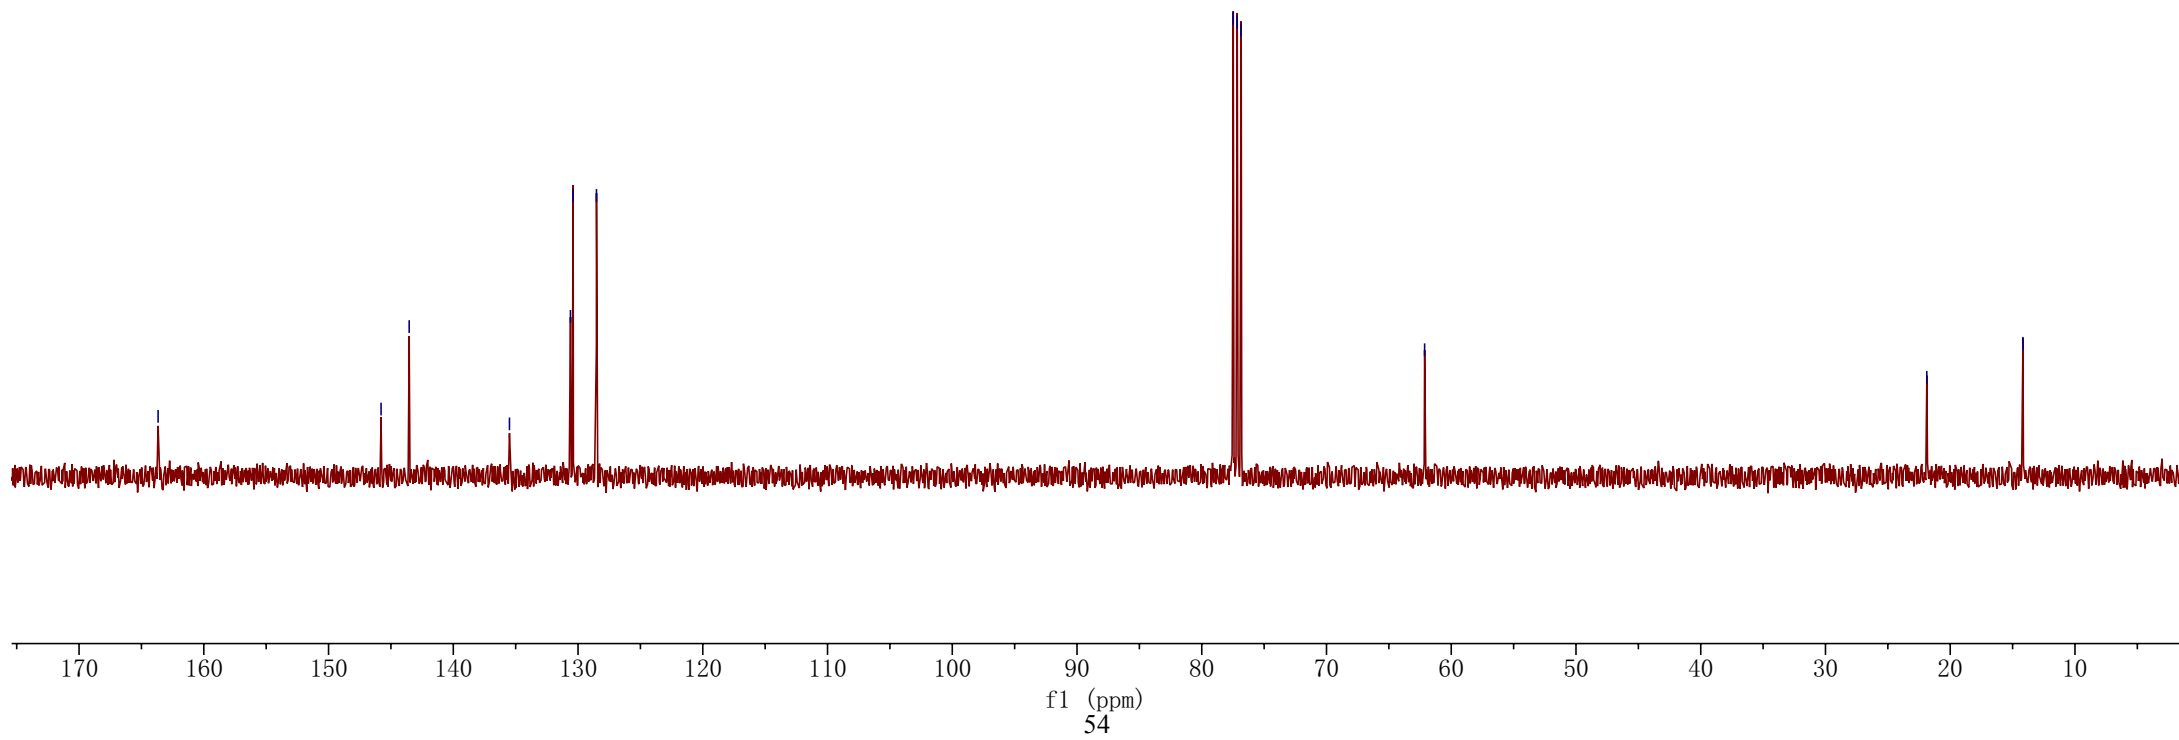

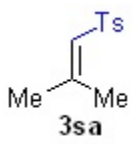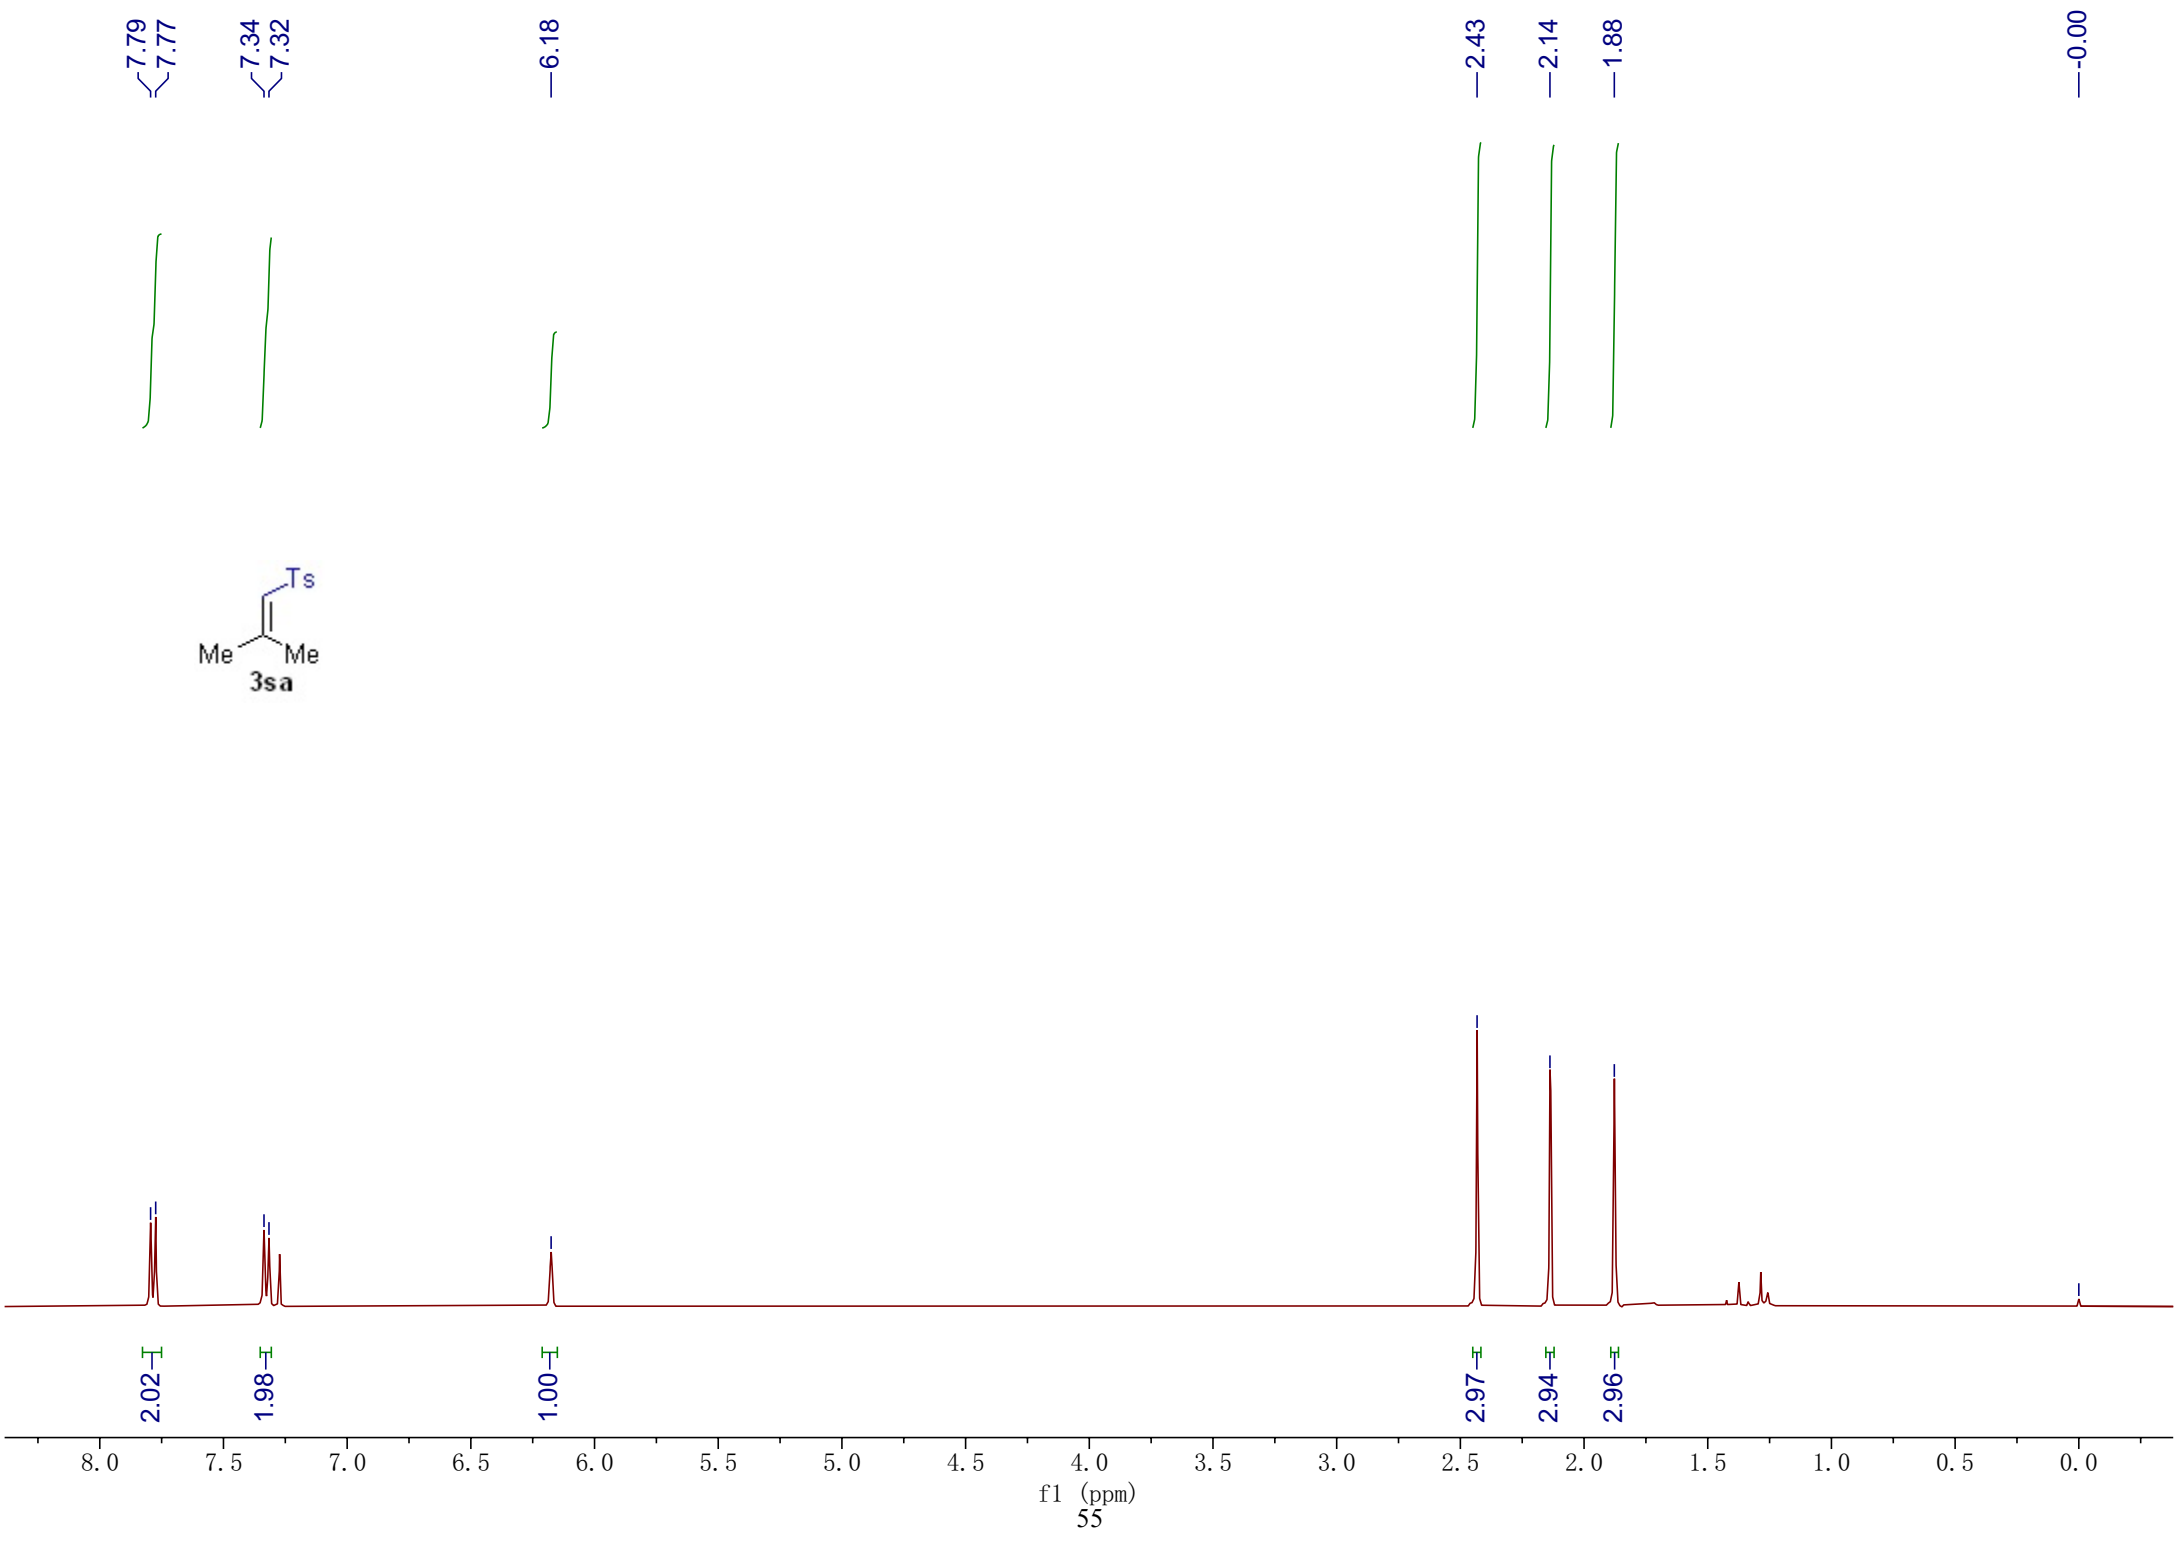

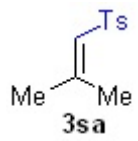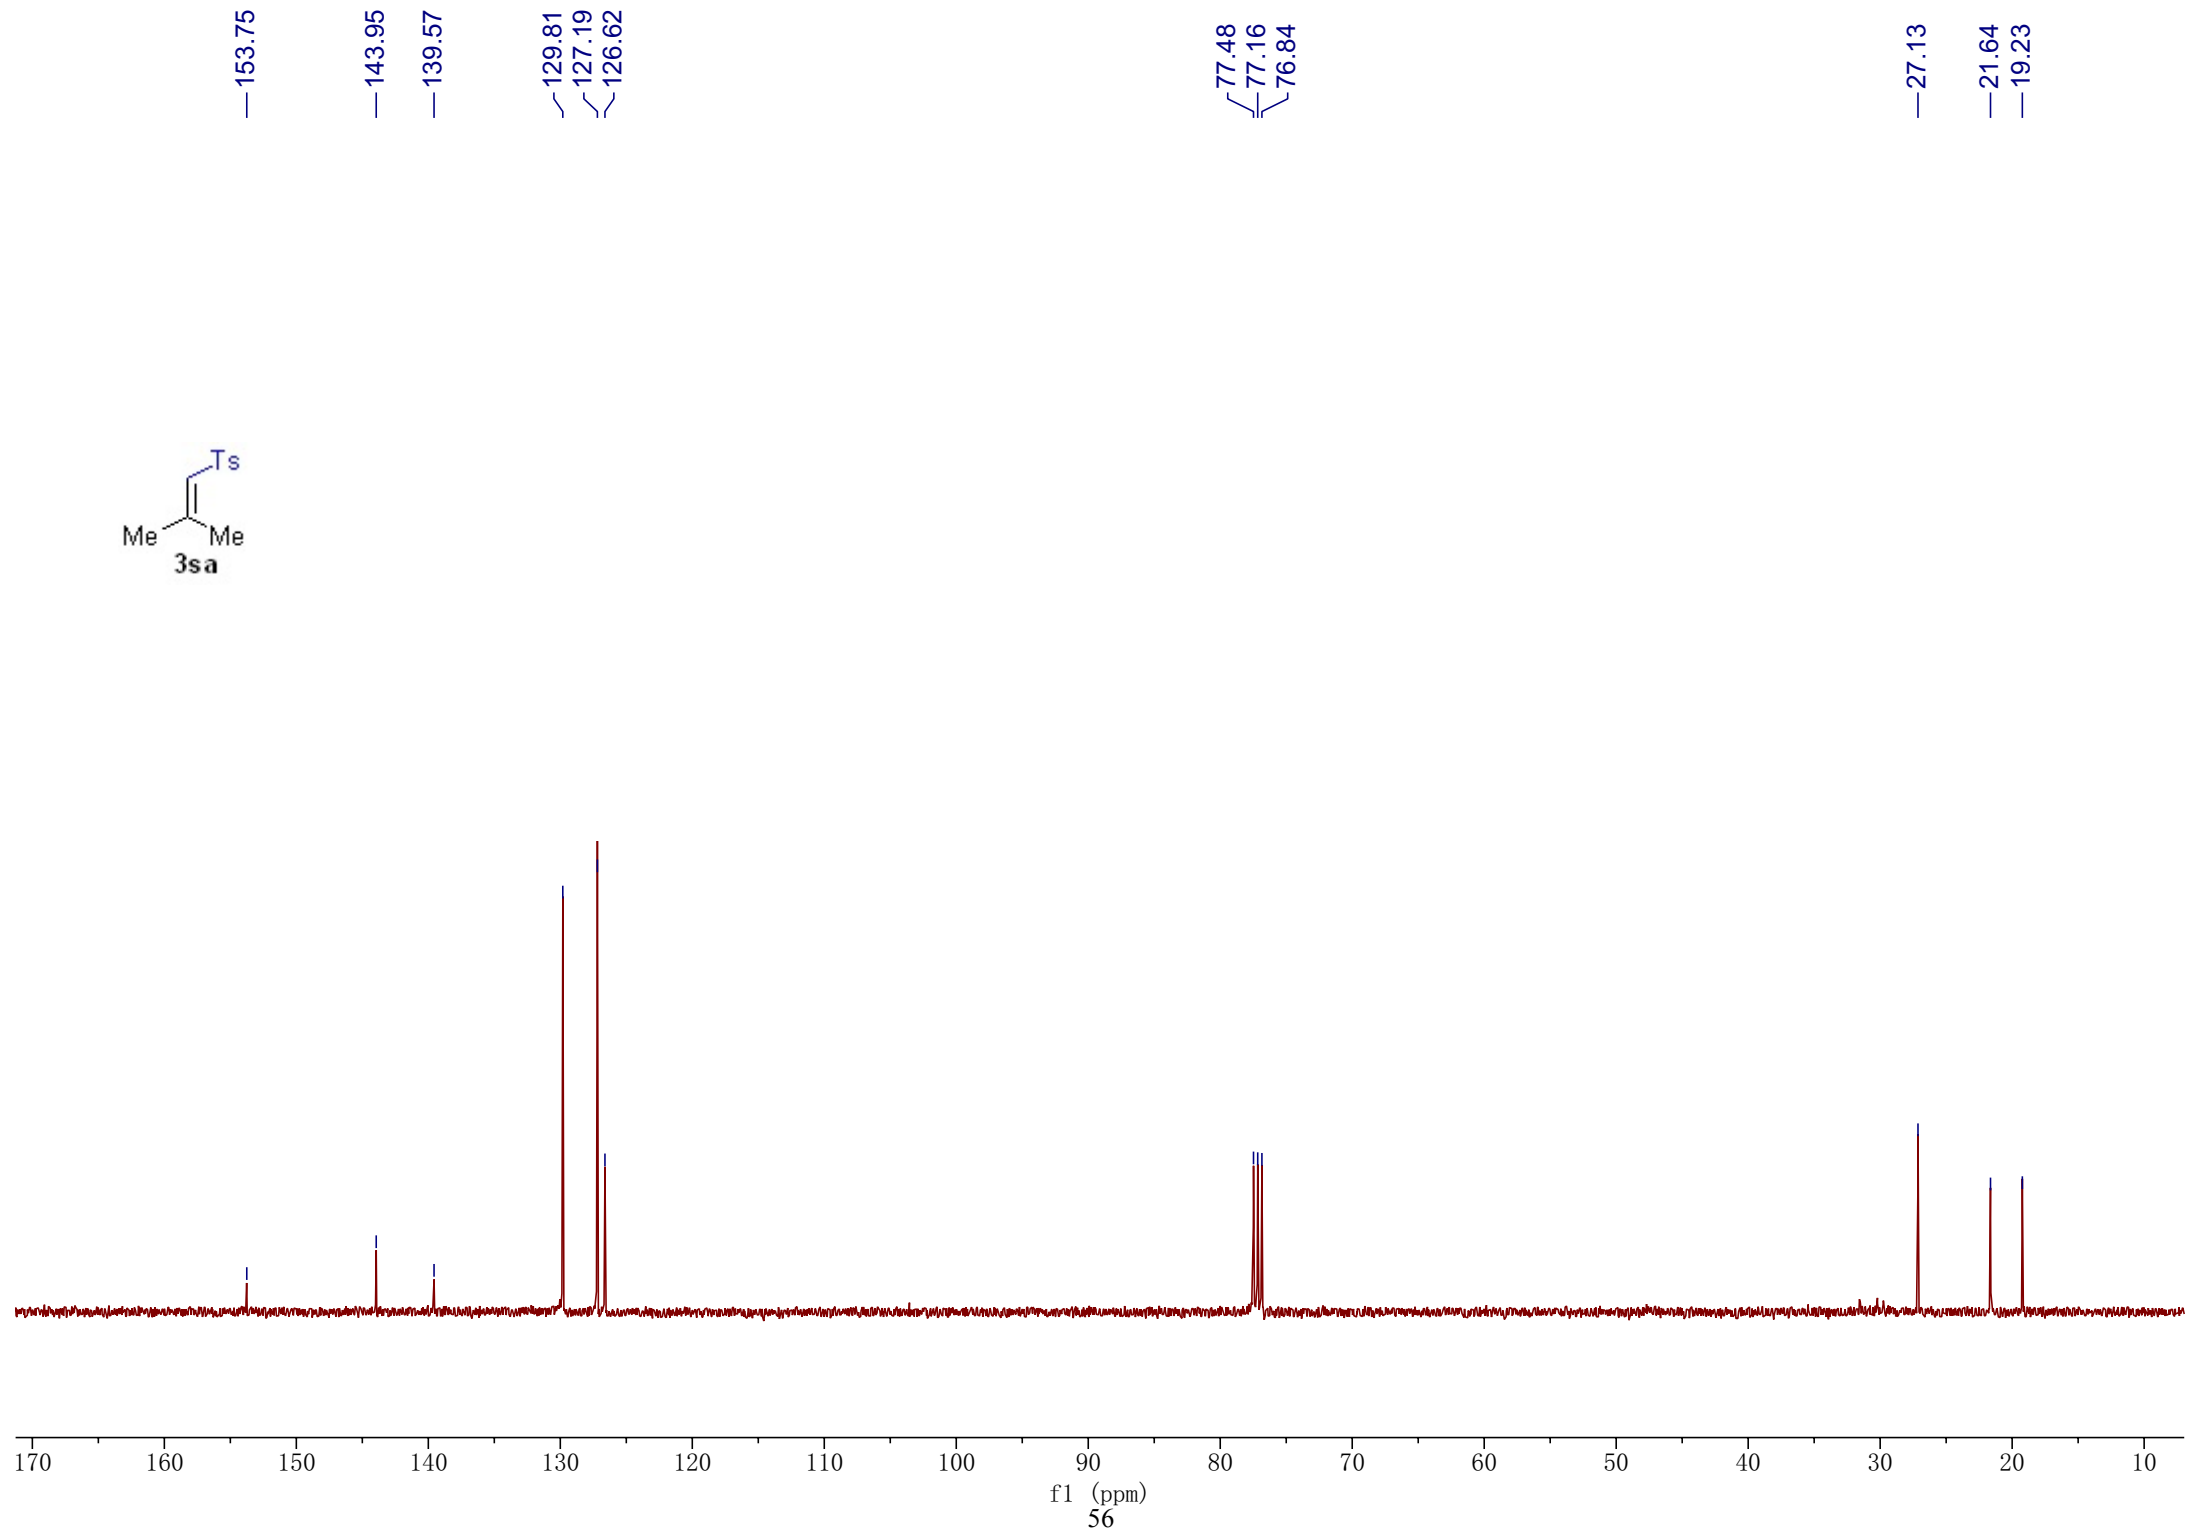



7.75  
7.73  
7.32  
7.30

2.43  
2.21  
2.21  
2.00  
1.86

0.00

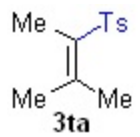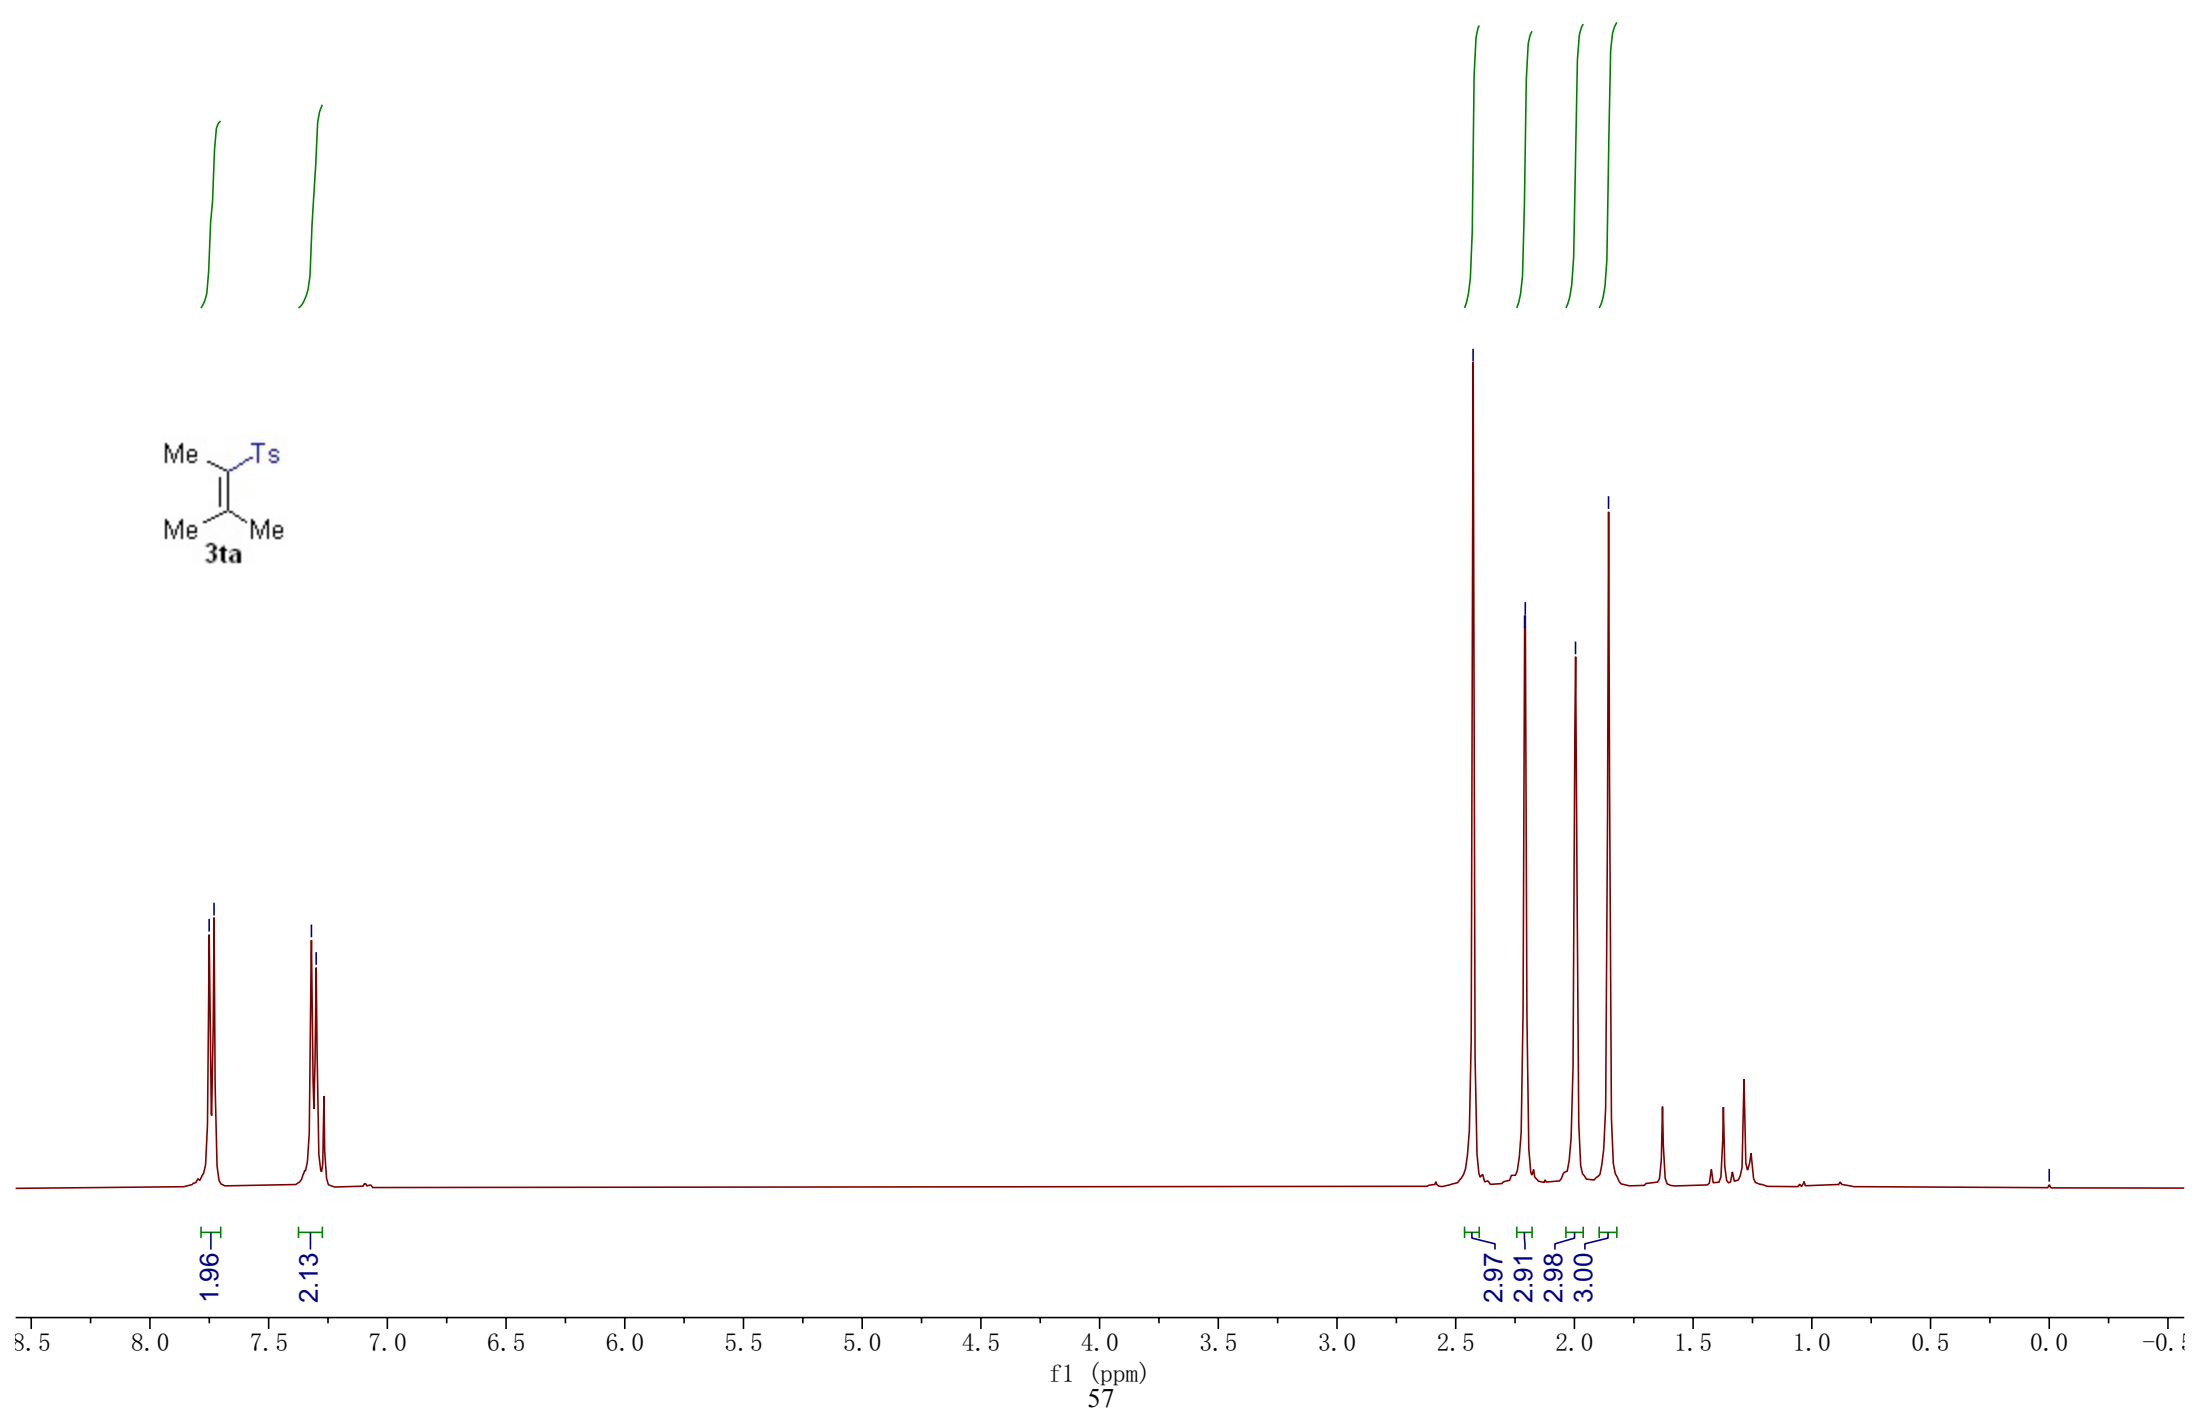

1.96

2.13

2.97

2.91

2.98

3.00

f1 (ppm)  
57

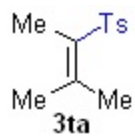

146.84  
143.71  
139.19

131.36  
129.72  
127.15

77.48  
77.16  
76.84

24.57  
22.22  
21.70  
16.03

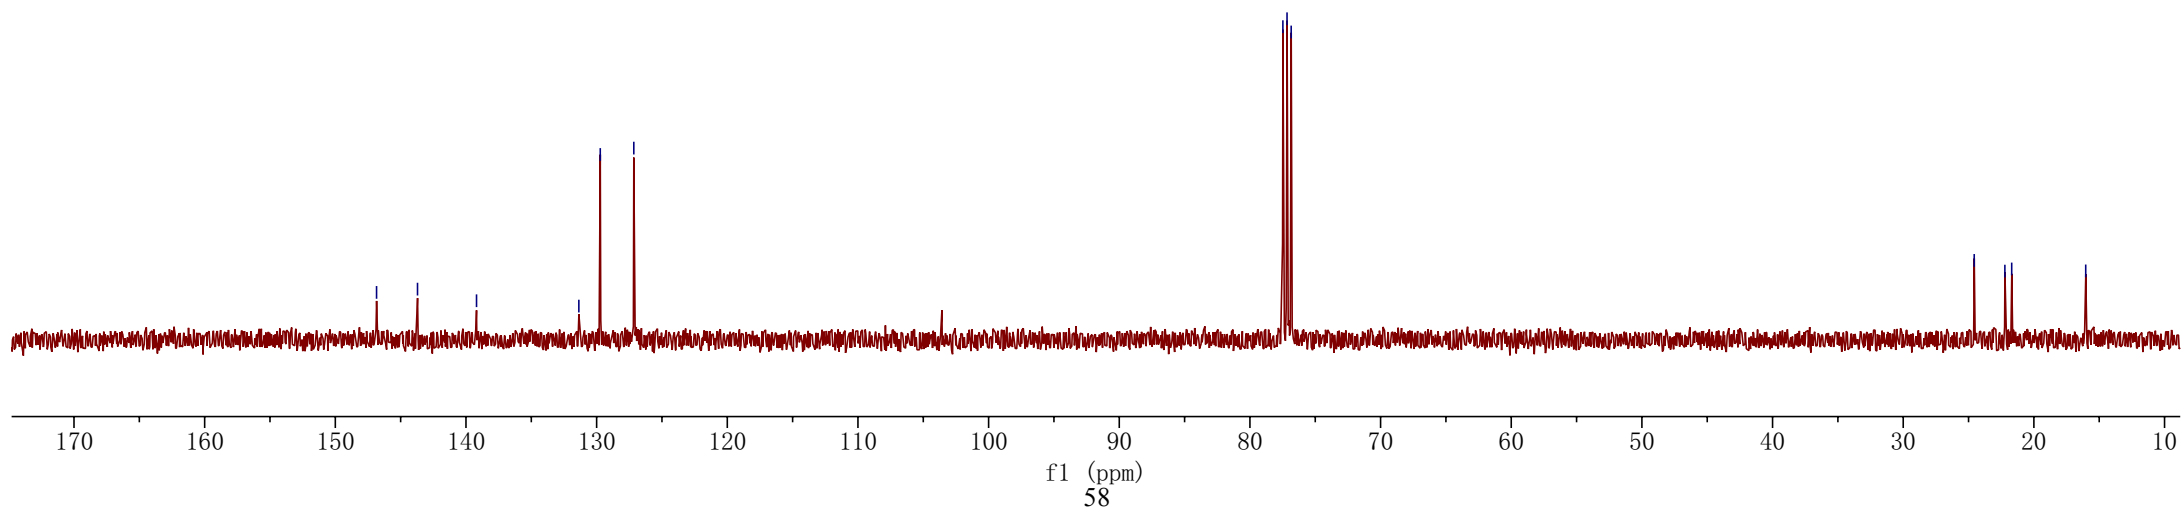

7.84  
7.82  
7.68  
7.64  
7.48  
7.47  
7.46  
7.40  
7.38  
7.35  
7.33  
6.87  
6.83

2.43

0.00

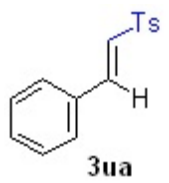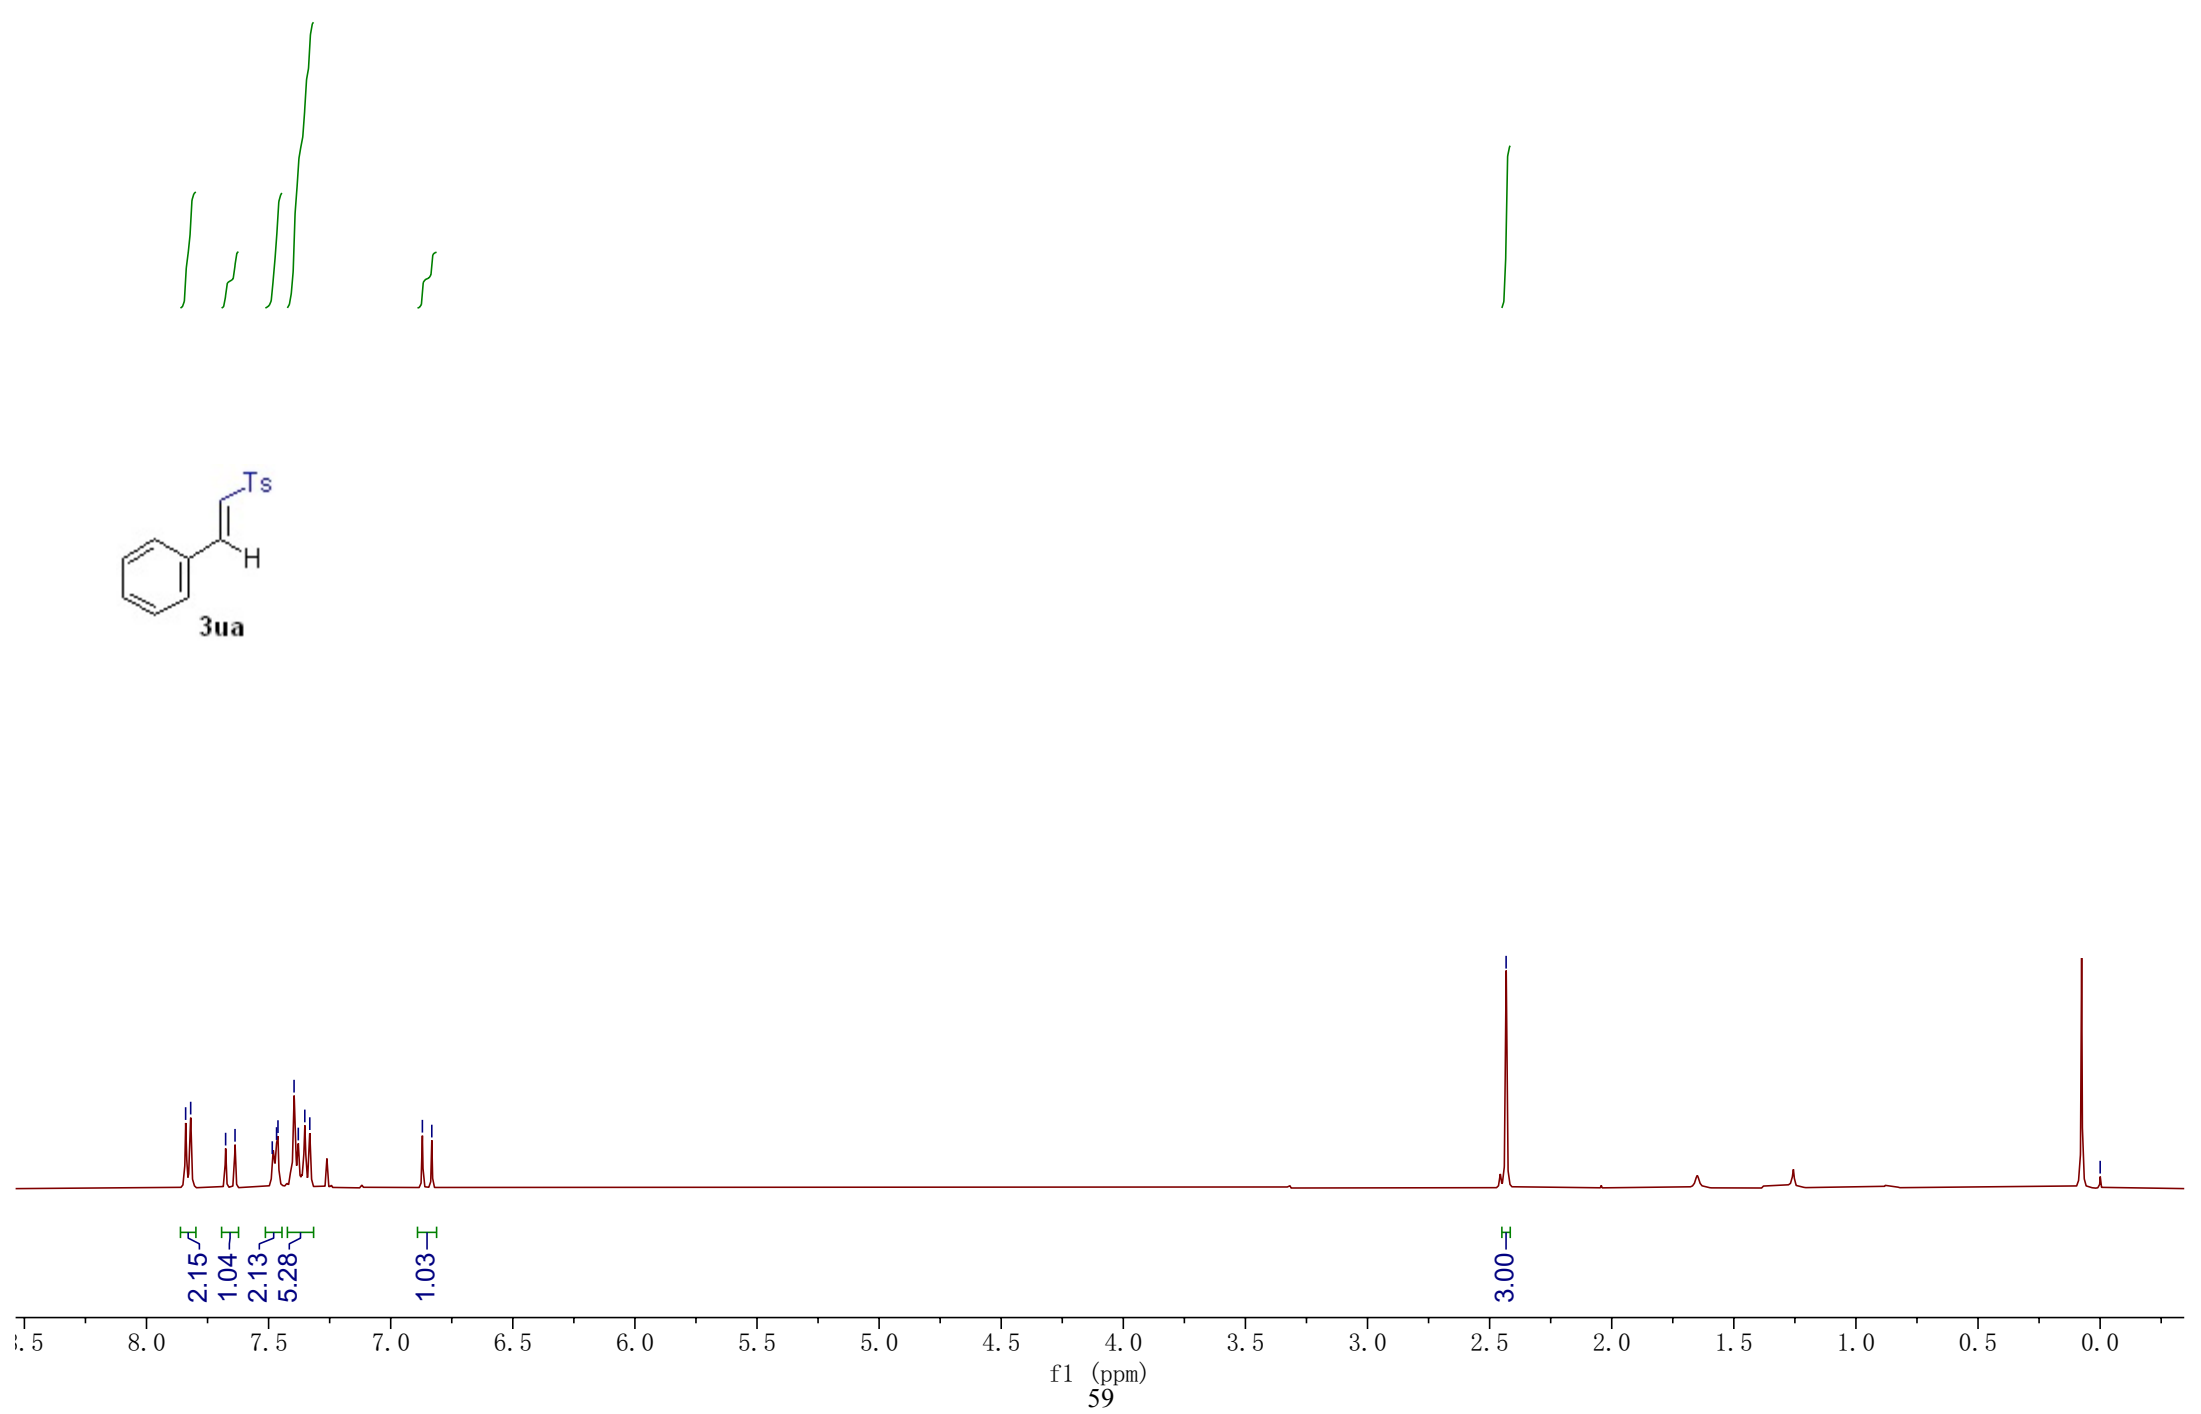

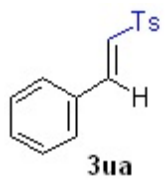

144.50  
142.04  
137.84  
132.55  
131.21  
130.07  
129.16  
128.62  
127.81  
127.73

77.48  
77.16  
76.84

21.73

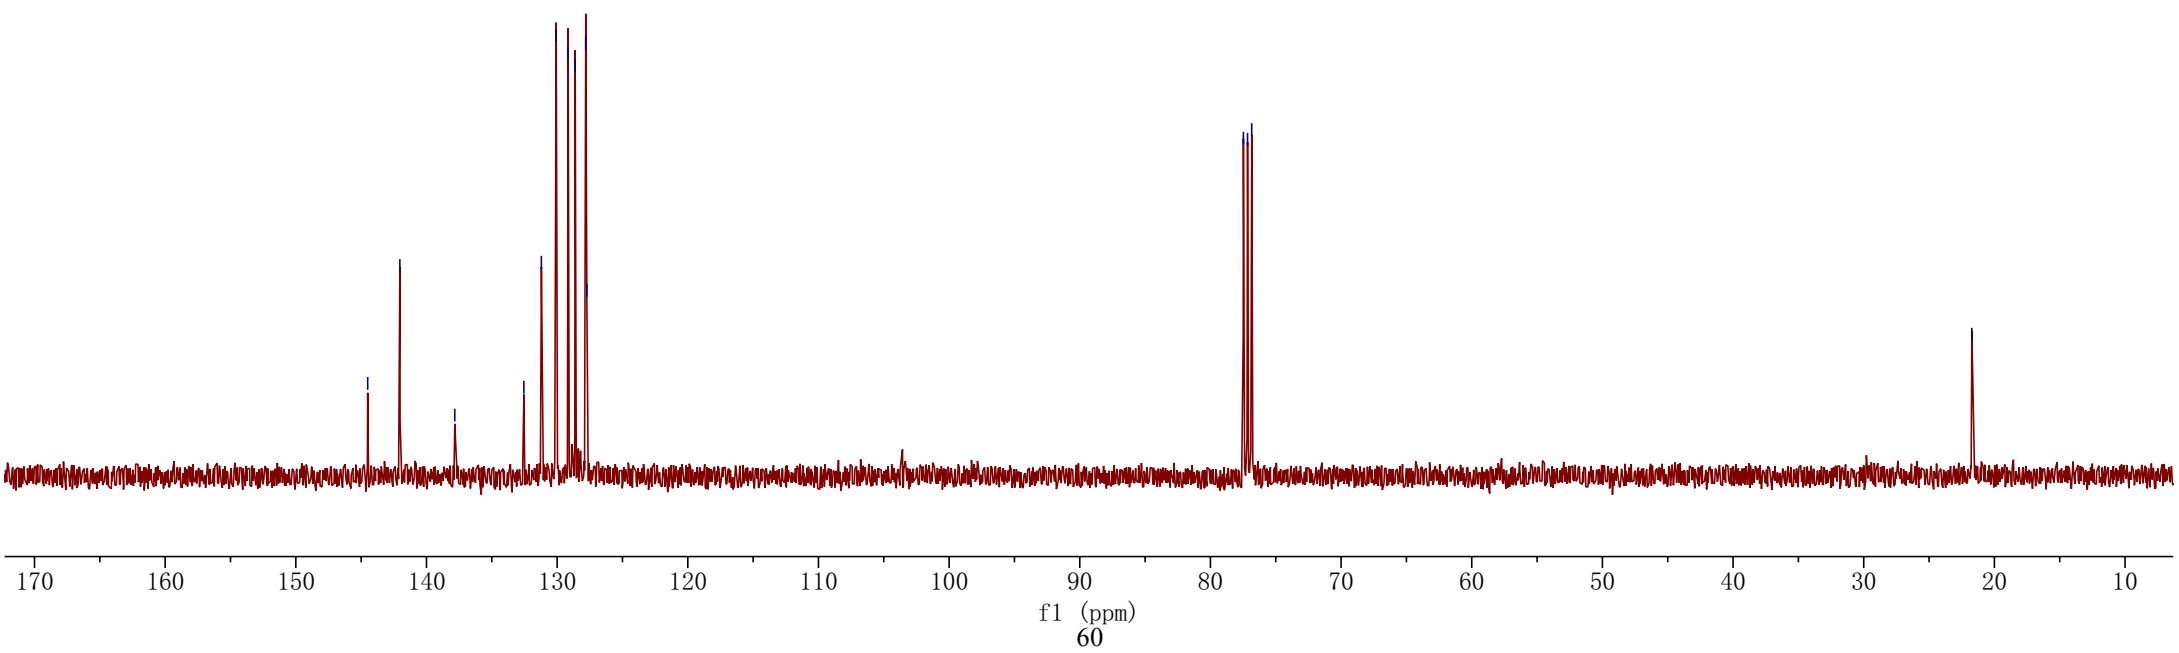

7.51  
7.49  
7.42  
7.40  
7.38  
7.28  
7.26  
7.24  
7.22  
7.21  
7.19  
7.18  
7.14  
7.12  
7.01  
6.99  
6.95

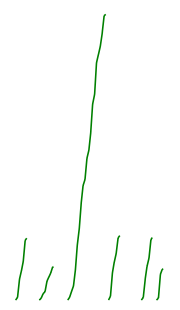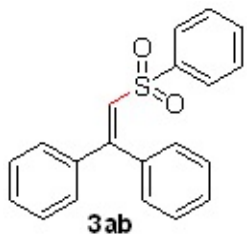

— 0.00

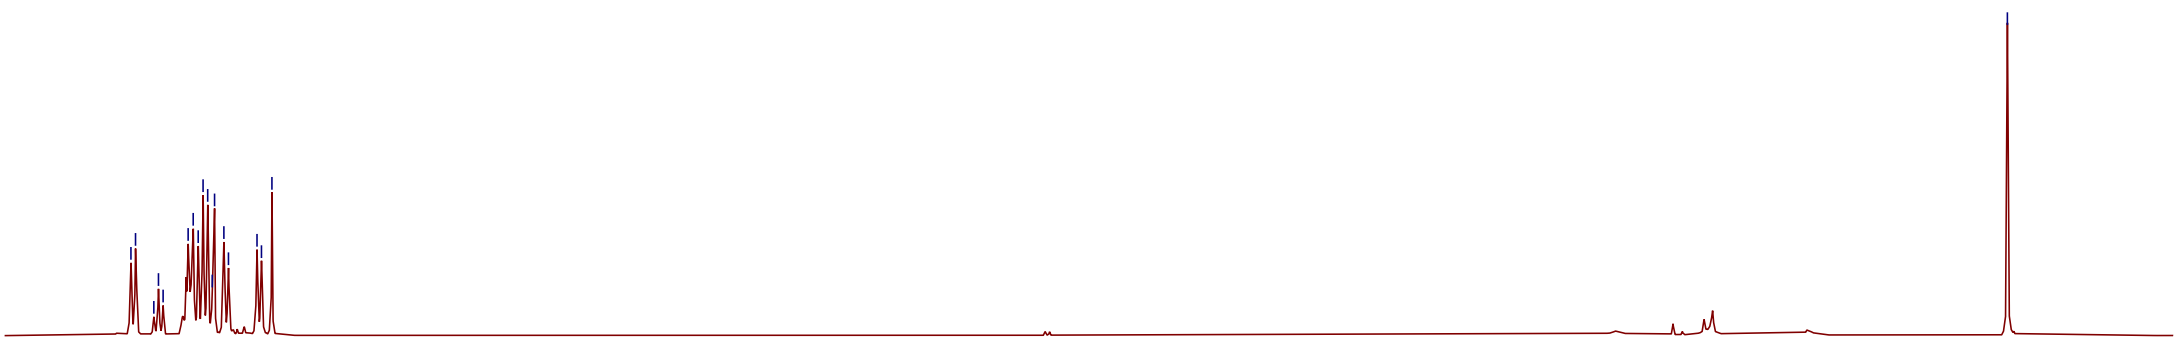

1.98  
1.07  
9.15  
2.07  
2.00  
1.00

8.0  
7.5  
7.0  
6.5  
6.0  
5.5  
5.0  
4.5  
4.0  
3.5  
3.0  
2.5  
2.0  
1.5  
1.0  
0.5  
0.0  
-0.5

f1 (ppm)  
61

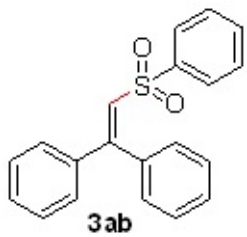

155.31  
141.53  
139.16  
135.54  
132.94  
130.44  
129.84  
128.97  
128.83  
128.77  
128.69  
128.30  
127.95  
127.71

77.48  
77.16  
76.84

130.44  
129.84  
128.97  
128.83  
128.77  
128.69  
128.30  
127.95  
127.71

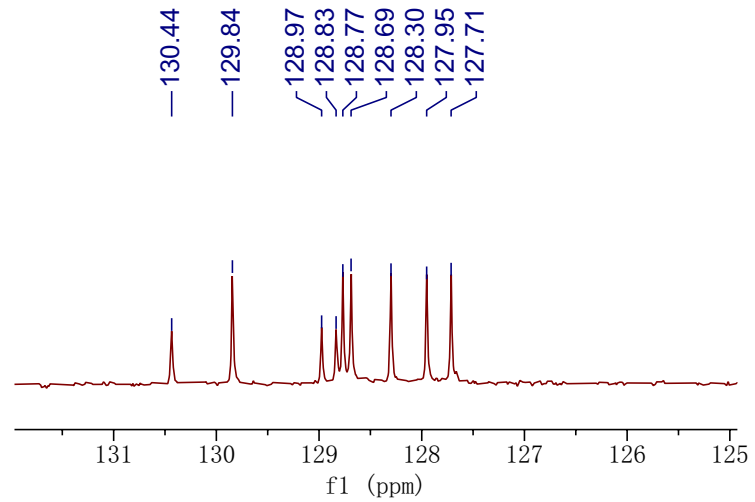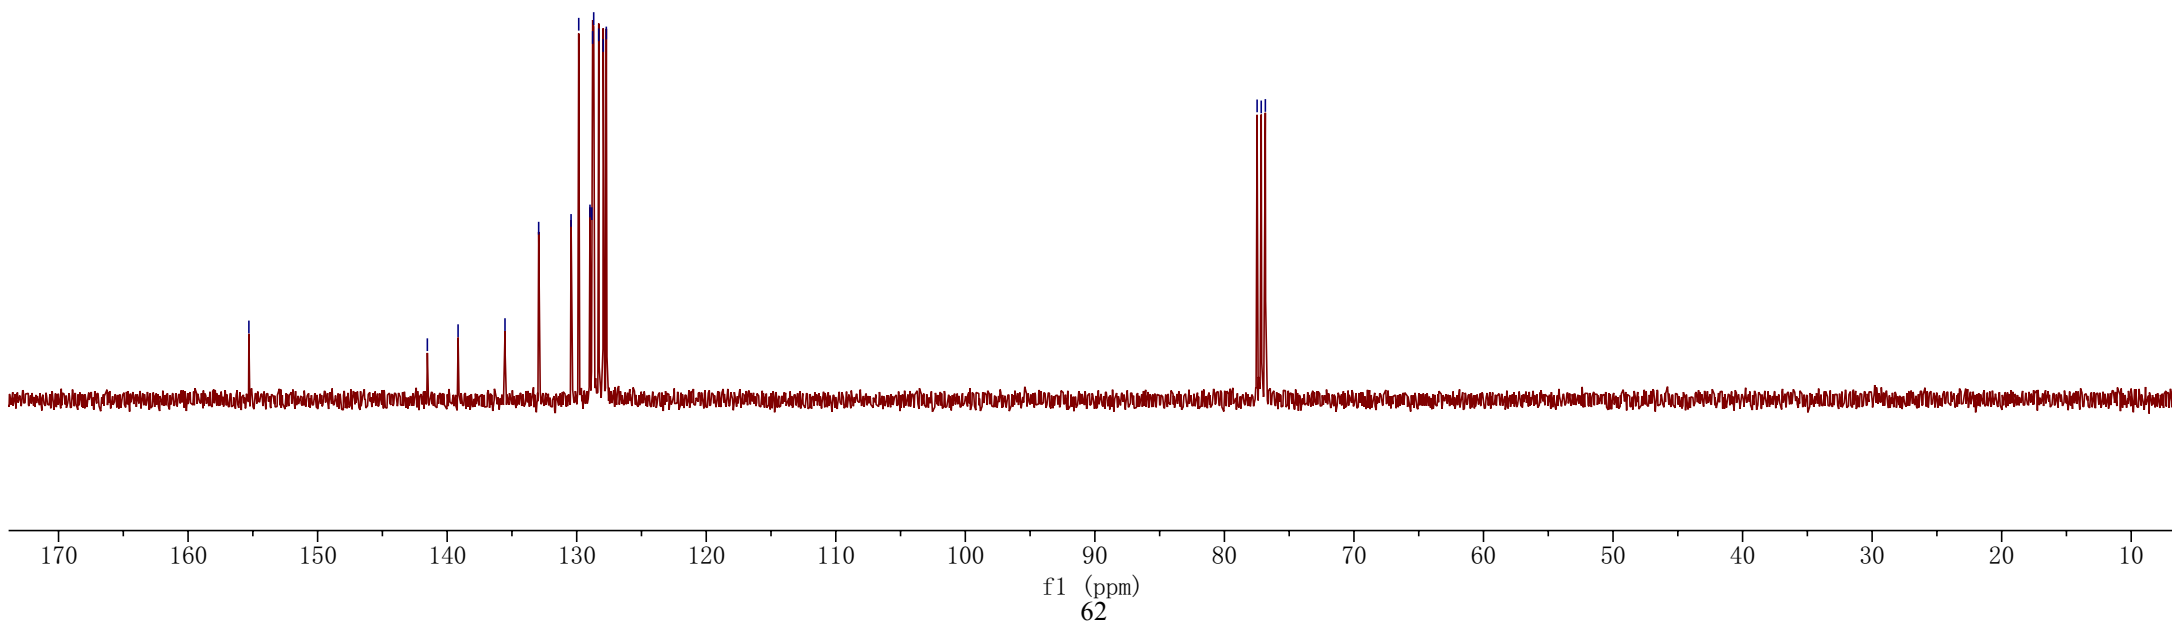

7.43  
7.41  
7.30  
7.30  
7.29  
7.28  
7.28  
7.27  
7.25  
7.24  
7.24  
7.23  
7.22  
7.22  
7.21  
7.20  
7.13  
7.12  
7.11  
7.03  
7.02  
7.01  
6.93  
6.74  
6.72

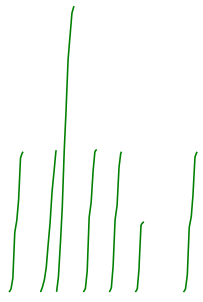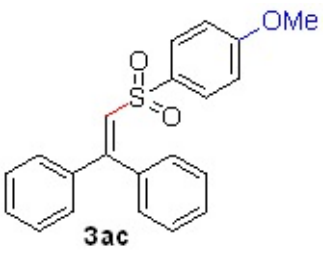

—3.75

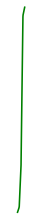

—0.00

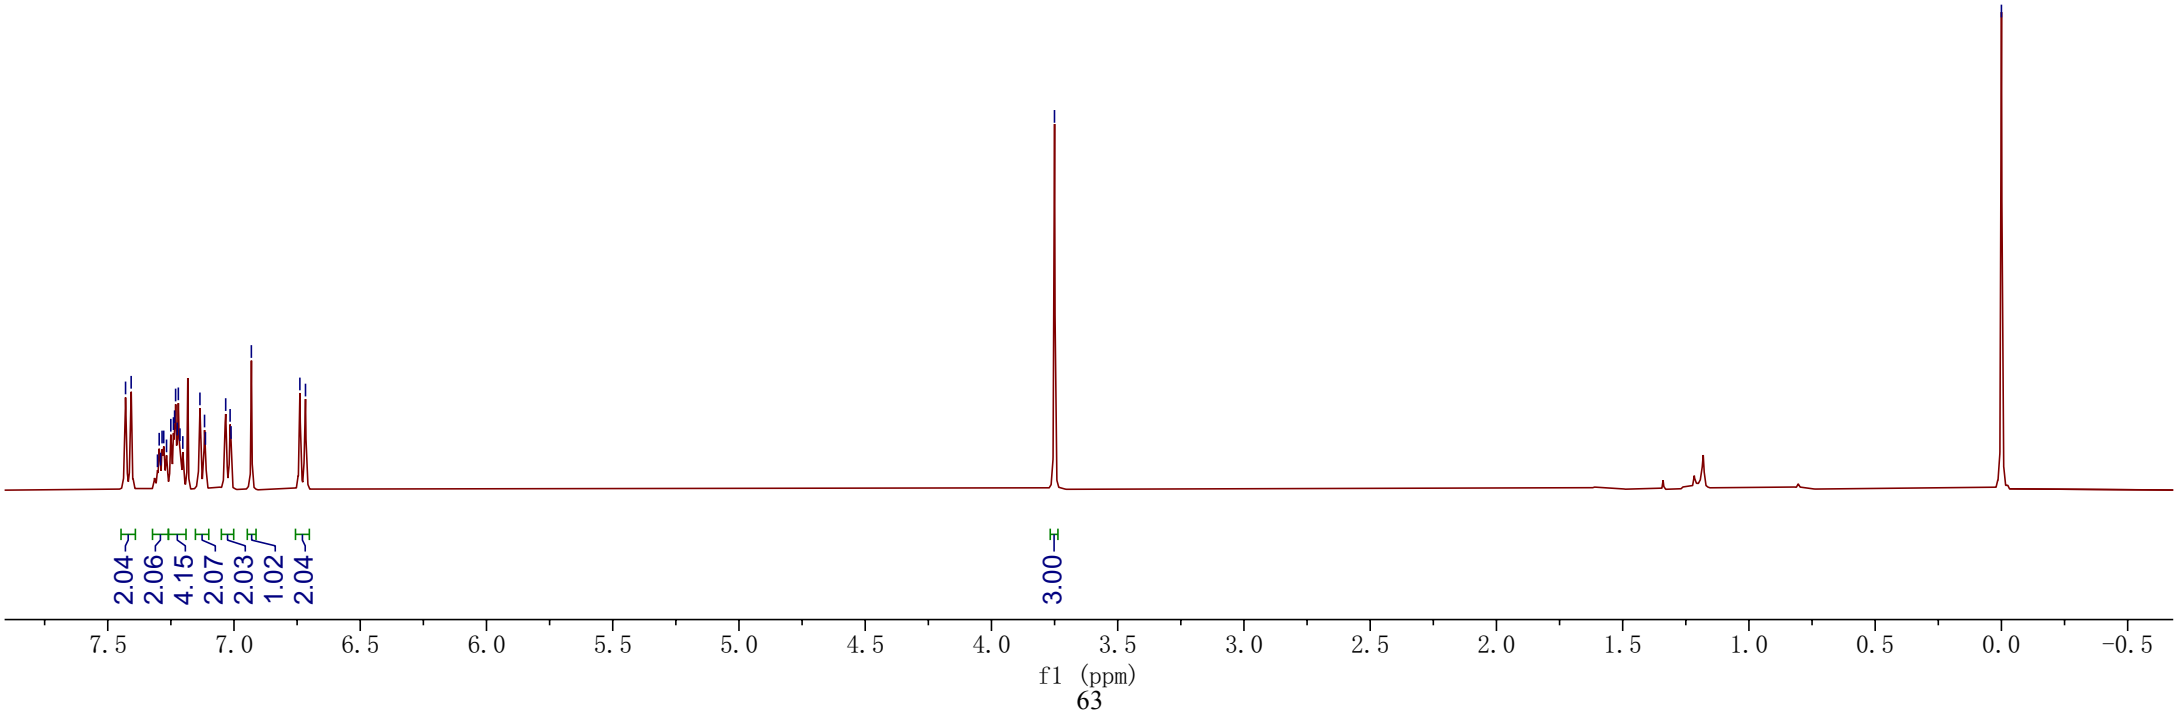

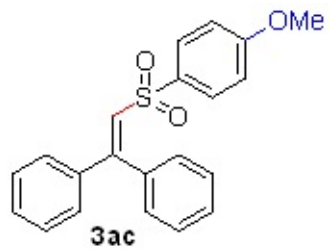

—163.22  
—154.40  
139.32  
135.70  
133.20  
130.29  
129.95  
129.89  
129.45  
128.92  
128.67  
128.27  
127.95  
—114.01

77.48  
77.16  
76.84  
—55.73

130.29  
129.95  
129.89  
—129.45  
128.92  
128.67  
128.27  
127.95

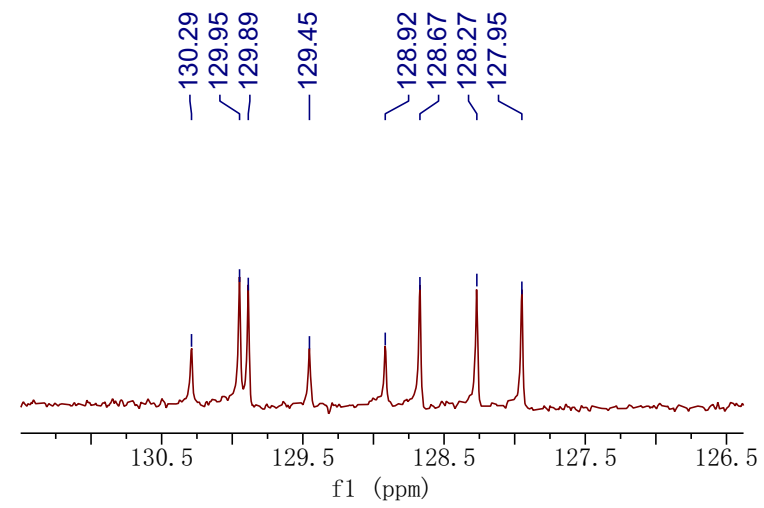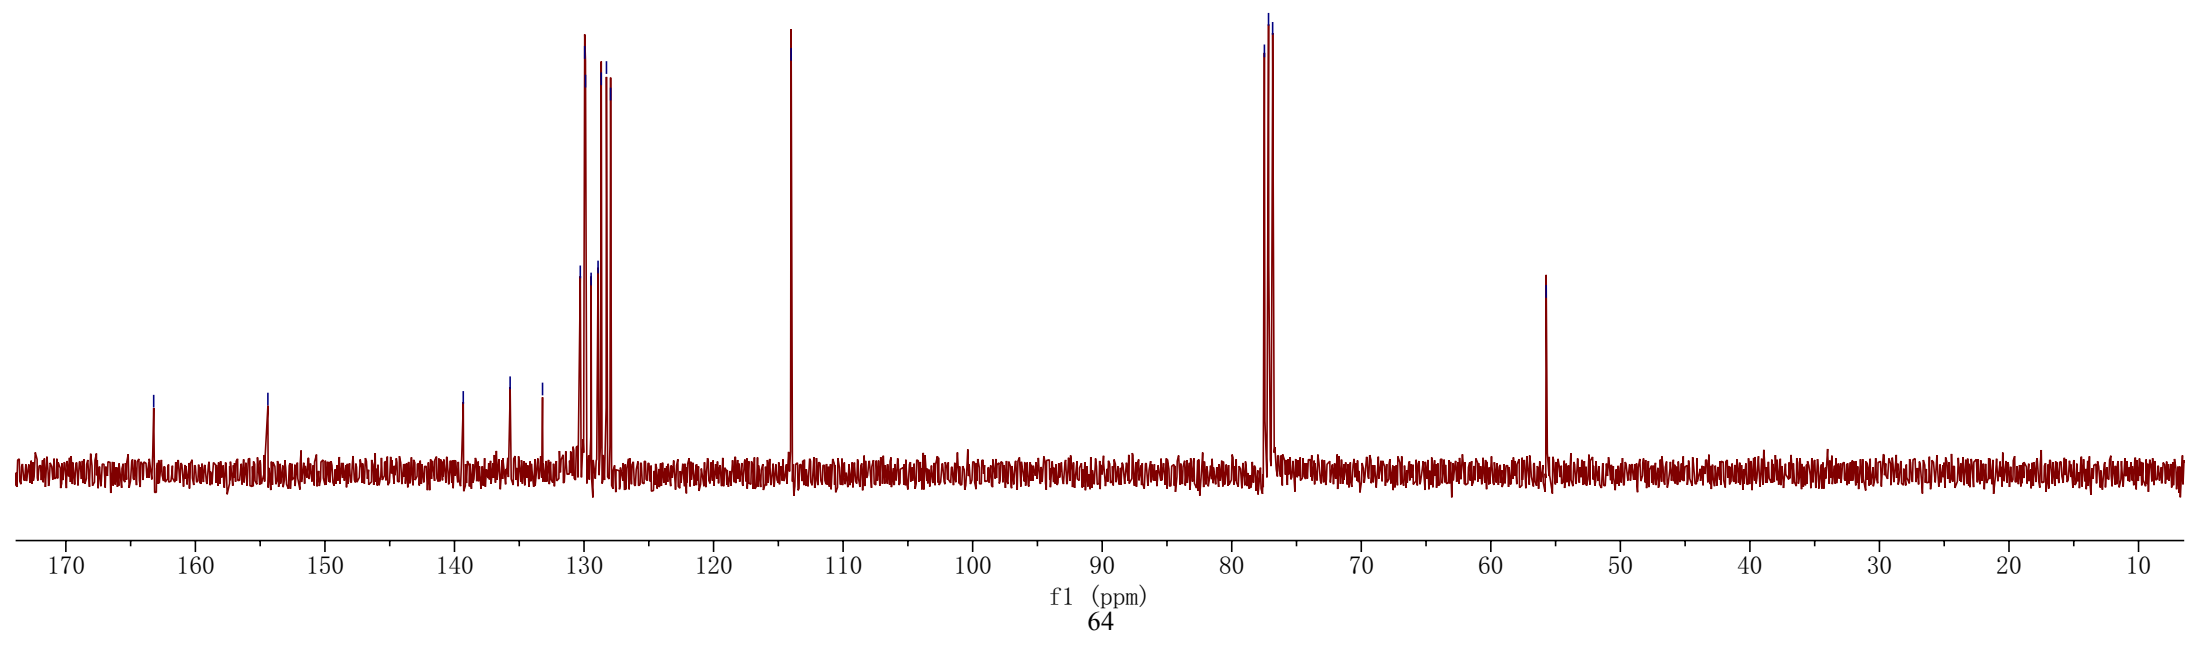



7.51  
7.49  
7.36  
7.35  
7.32  
7.32  
7.30  
7.28  
7.26  
7.25  
7.22  
7.20  
7.20  
7.09  
7.07  
7.06  
7.02

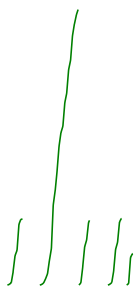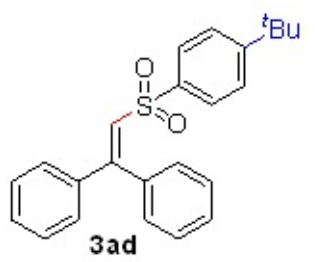

1.30

0.00

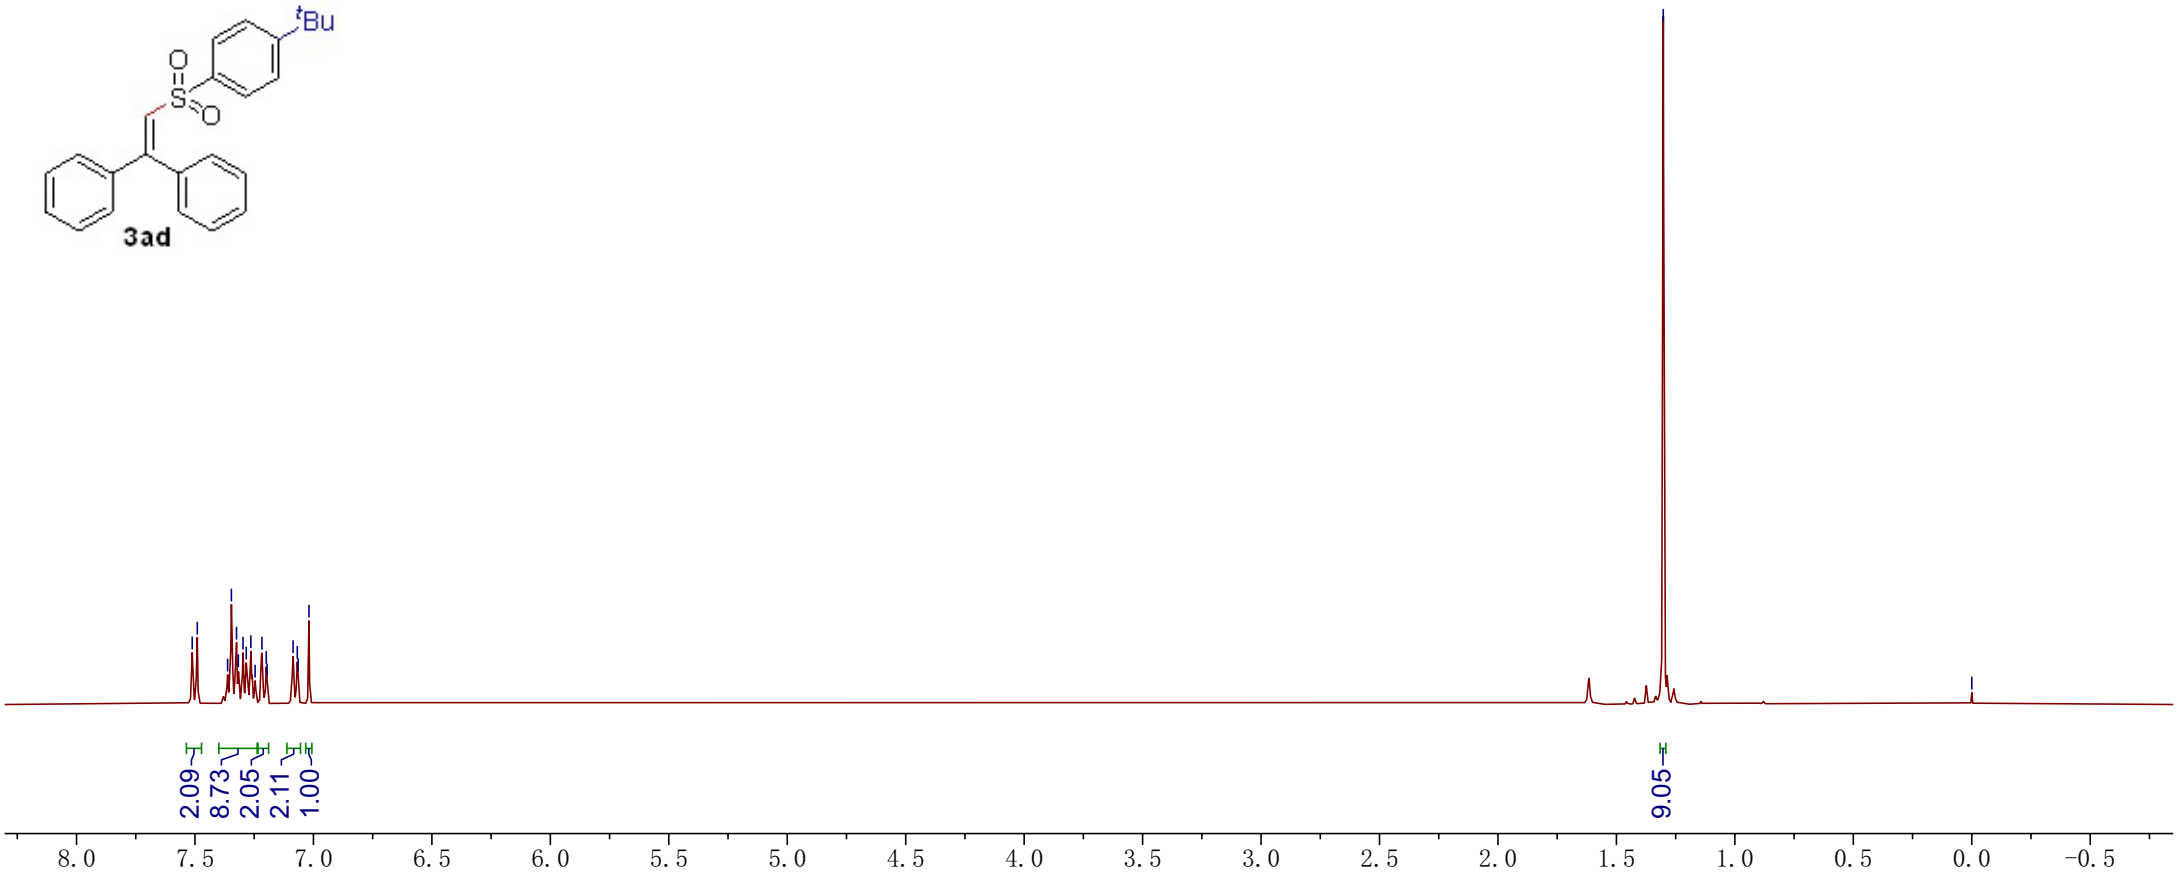

2.09  
8.73  
2.05  
2.11  
1.00

9.05

f1 (ppm)  
65

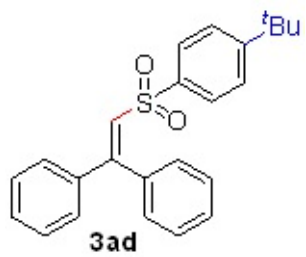

— 156.72  
— 154.62

— 139.28  
— 138.35  
— 135.69  
— 130.32  
— 129.86  
— 129.22  
— 128.85  
— 128.66  
— 128.30  
— 127.91  
— 127.62  
— 125.76

— 77.48  
— 77.16  
— 76.84

— 35.20  
— 31.14

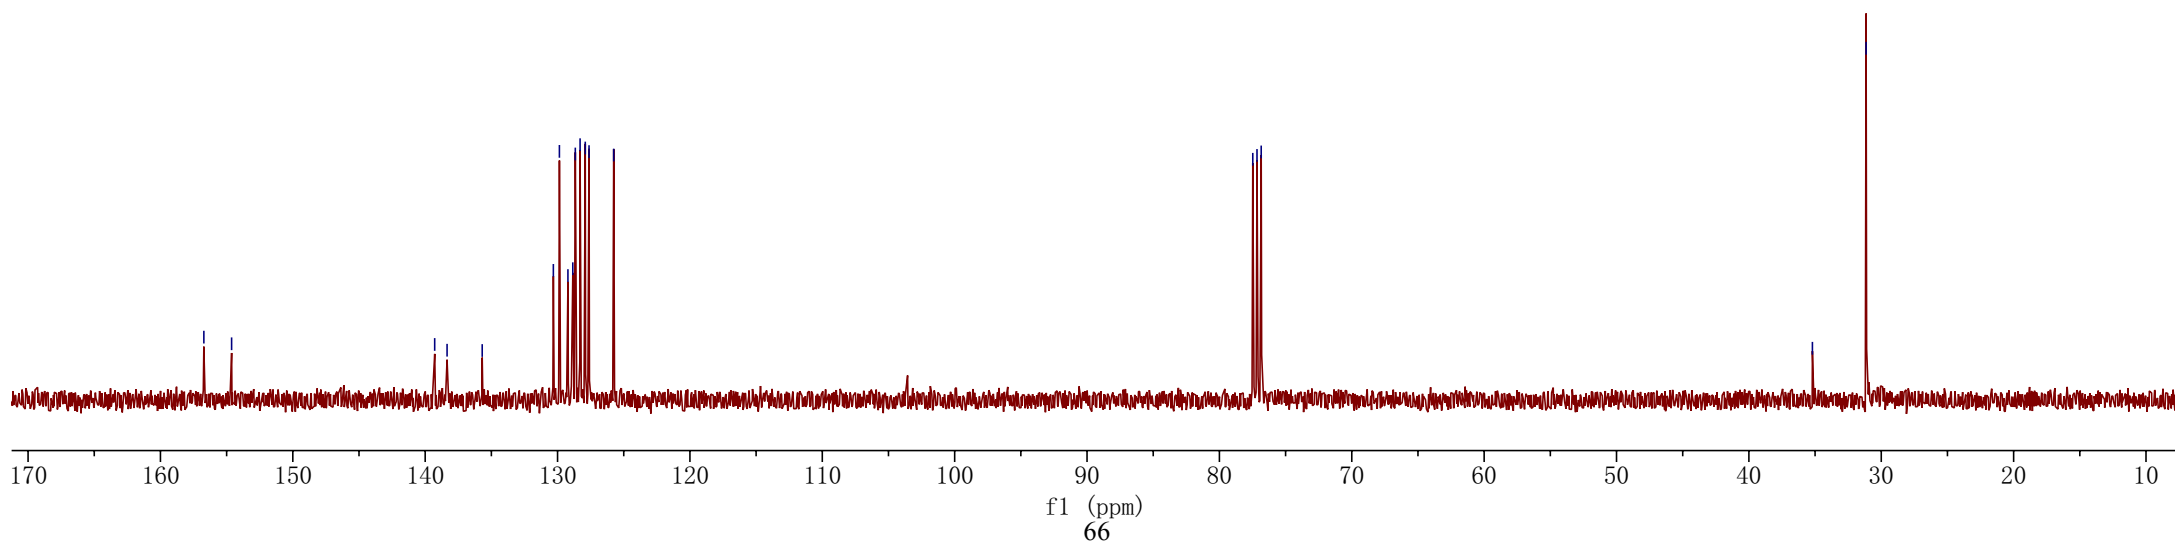

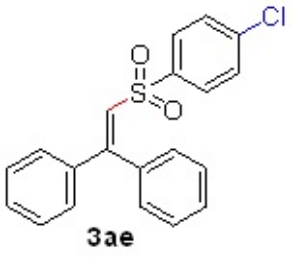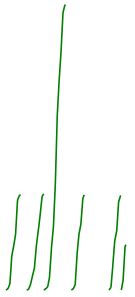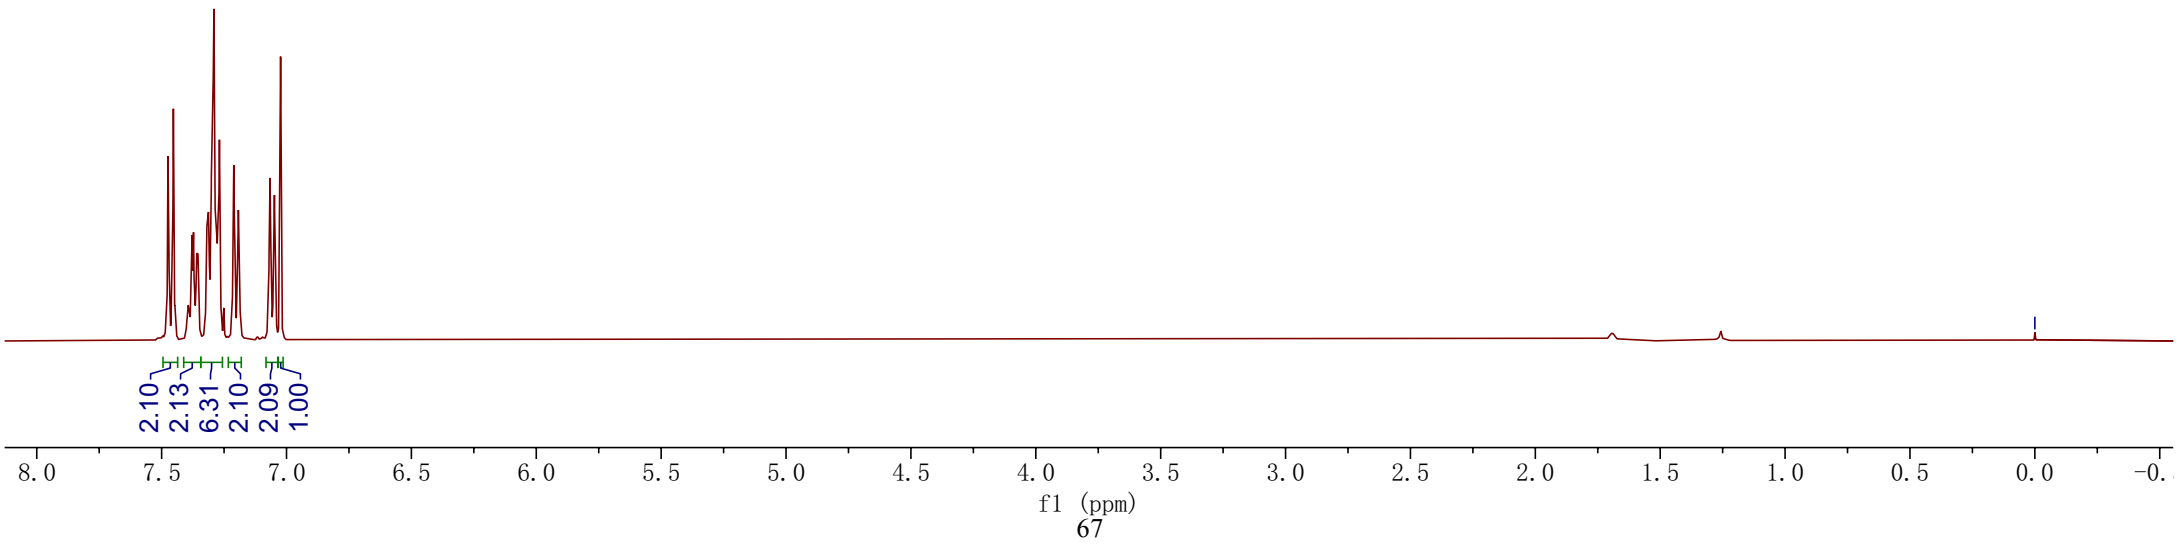

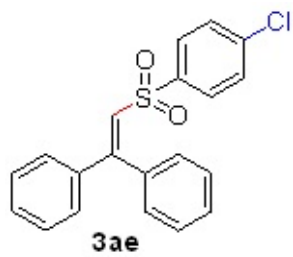

— 155.70

139.89  
139.46  
138.82  
135.36  
130.58  
129.79  
129.16  
129.08  
128.93  
128.69  
128.55  
128.25  
127.96

77.48  
77.16  
76.84

— 130.58

— 129.79

129.16  
129.08  
128.93  
128.69  
128.55  
128.25  
127.96

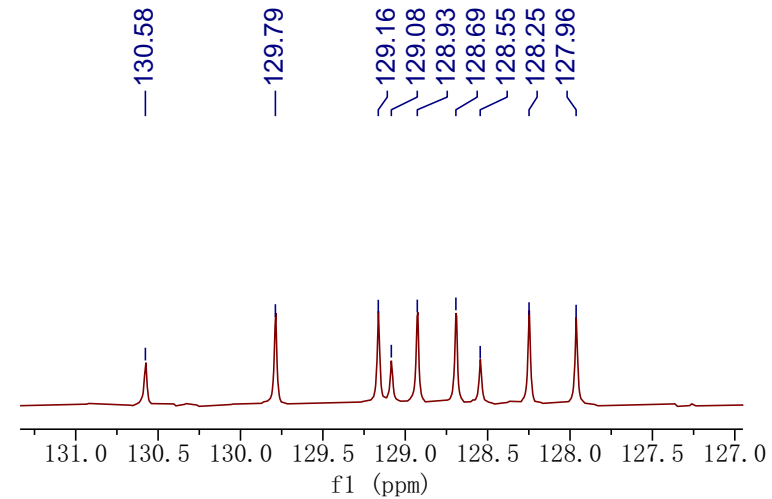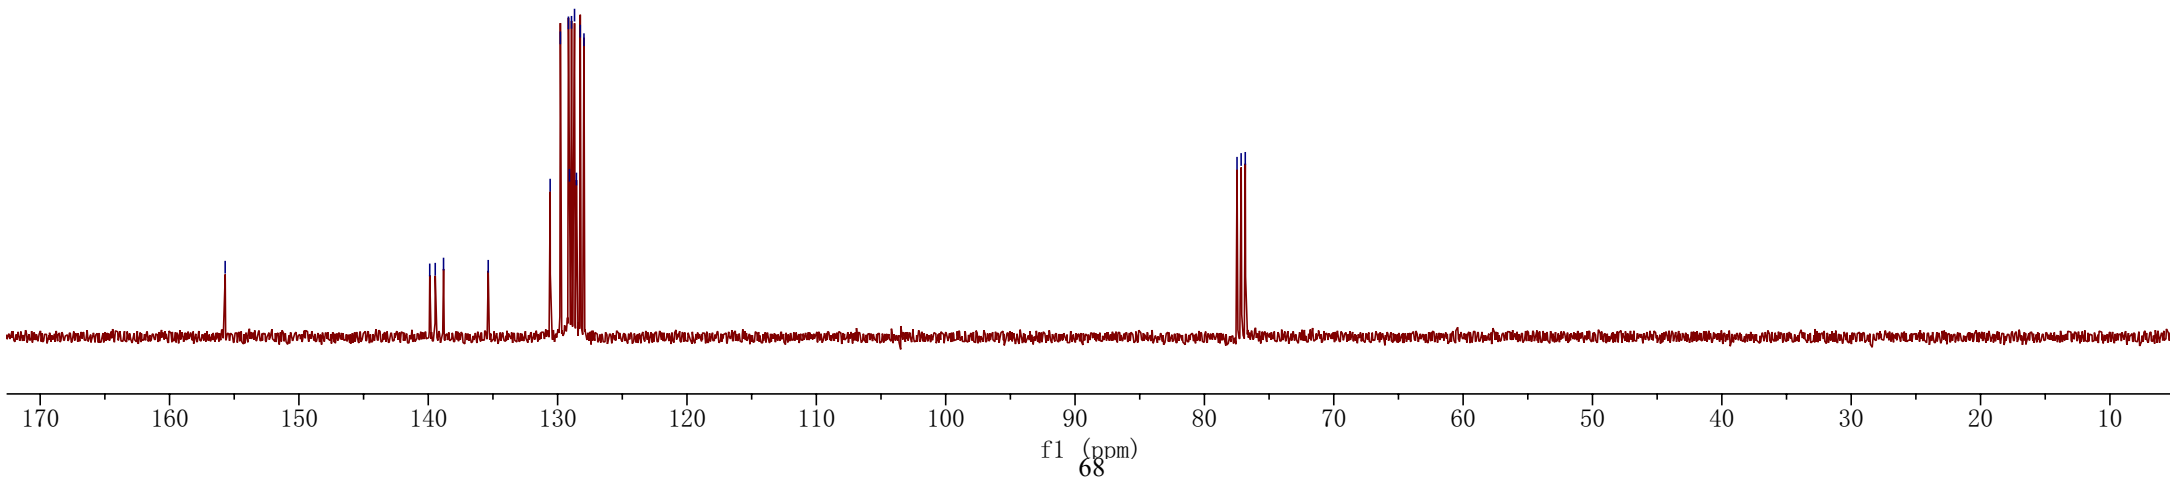

7.56  
7.54  
7.54  
7.54  
7.52  
7.40  
7.40  
7.38  
7.38  
7.36  
7.36  
7.33  
7.32  
7.31  
7.30  
7.29  
7.28  
7.22  
7.20  
7.20  
7.07  
7.06  
7.05  
7.04  
7.01  
6.99  
6.96

— 0.00

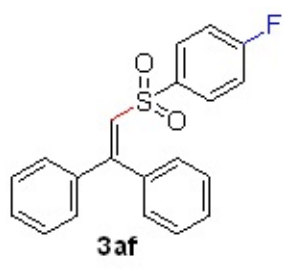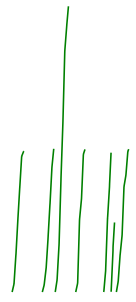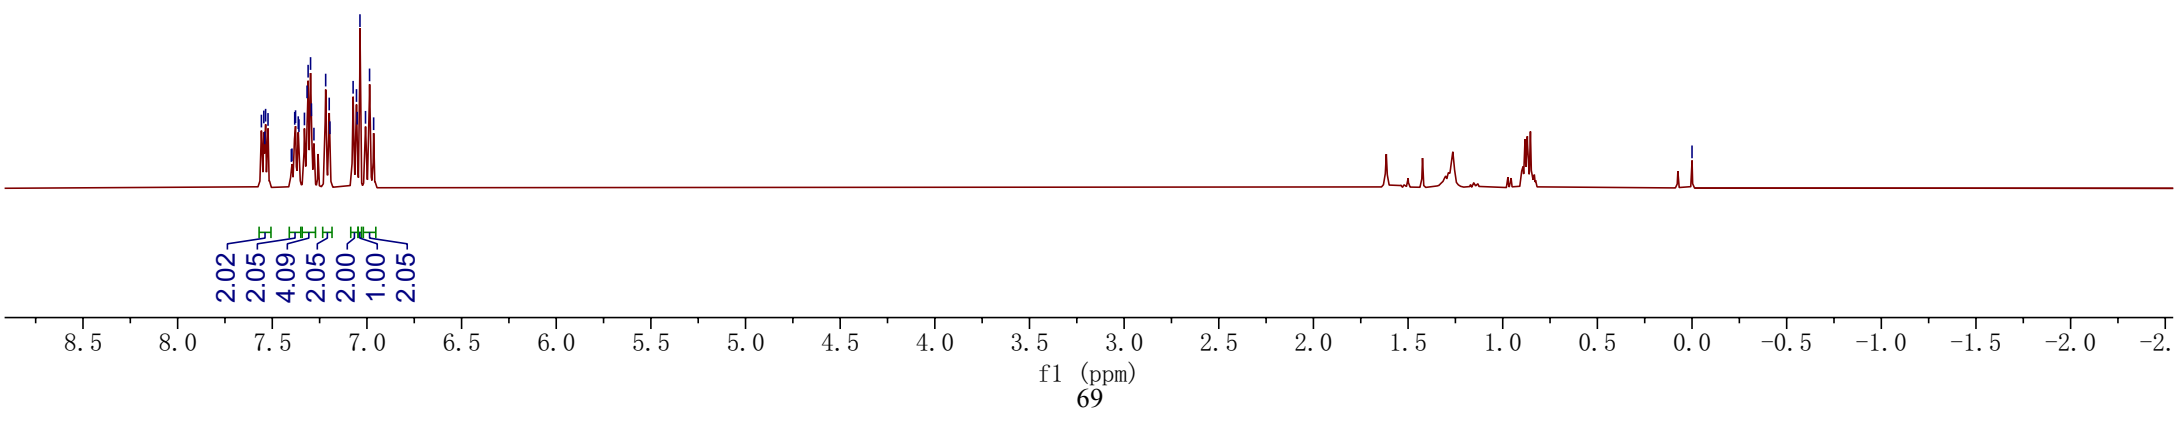

— 166.56  
— 164.02

— 155.49

— 138.95  
— 135.46  
— 130.62  
— 130.58  
— 130.52  
— 129.86  
— 129.10  
— 128.89  
— 128.74  
— 128.29  
— 128.03  
— 116.05  
— 115.83

— 77.48  
— 77.16  
— 76.84

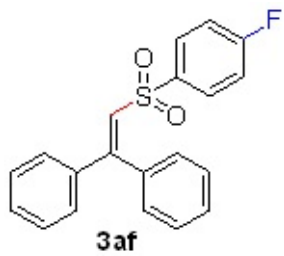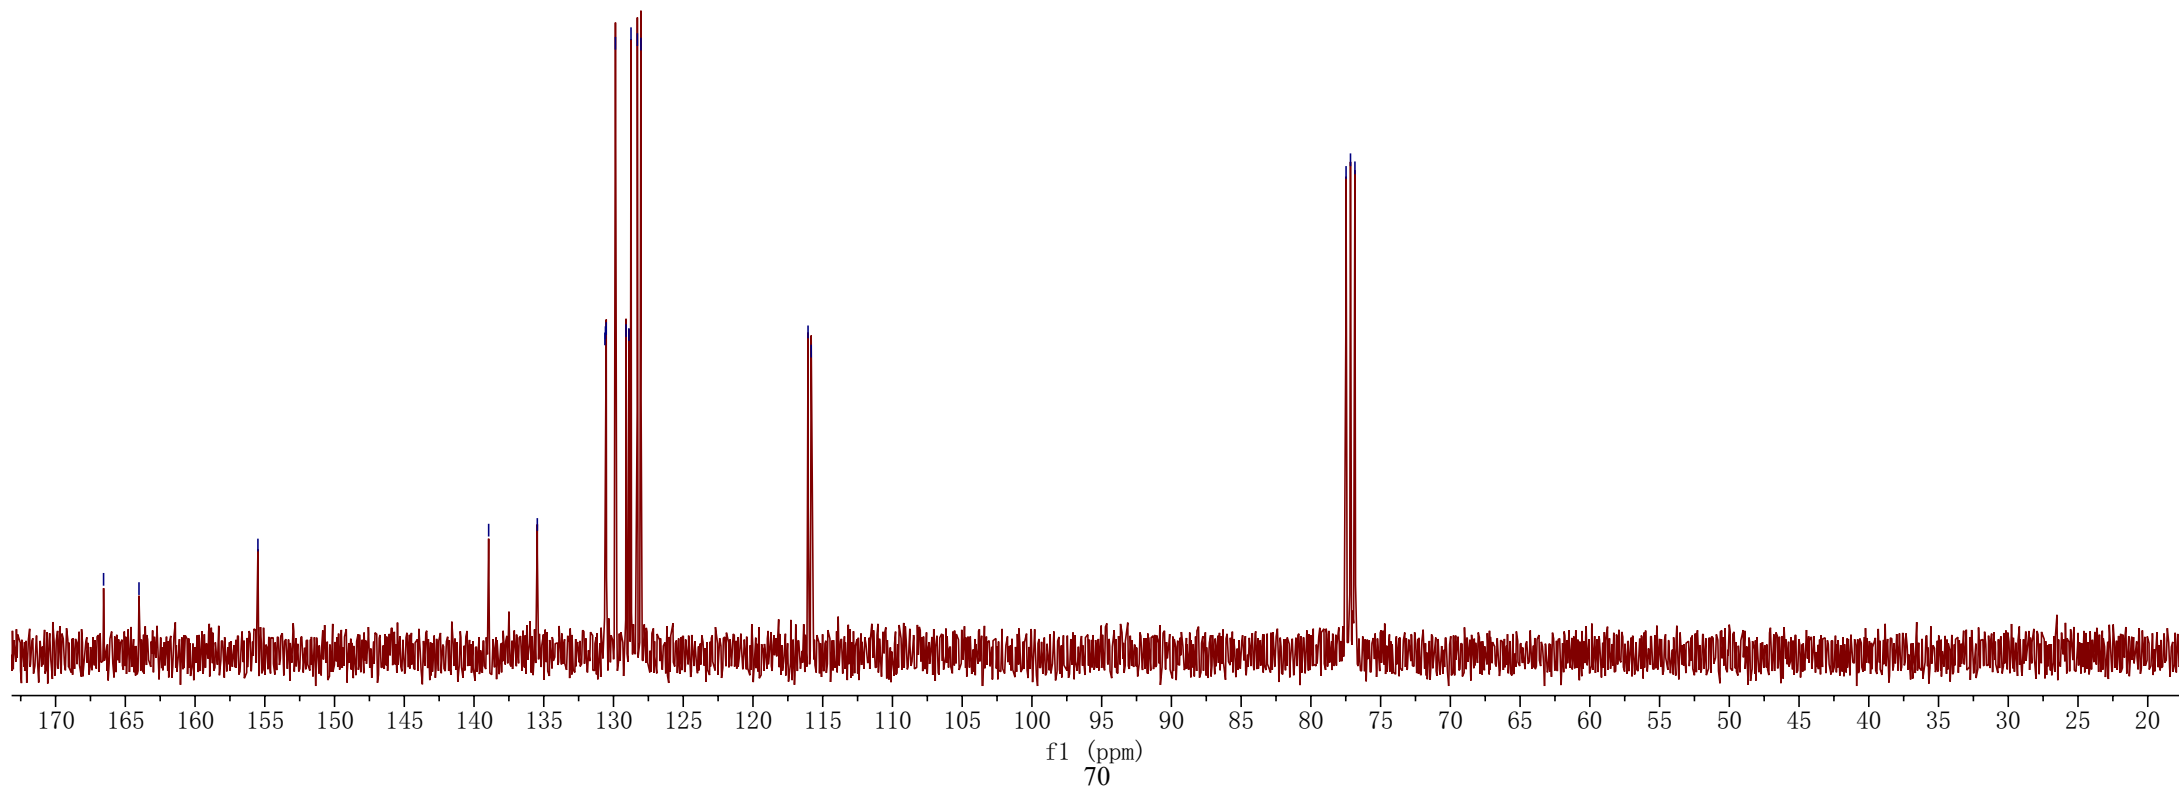

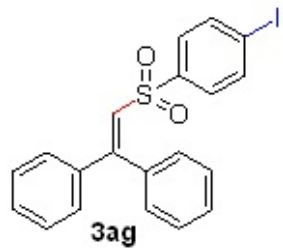

7.68  
7.66  
7.39  
7.38  
7.36  
7.32  
7.30  
7.29  
7.25  
7.23  
7.21  
7.19  
7.06  
7.05  
7.01

—0.00

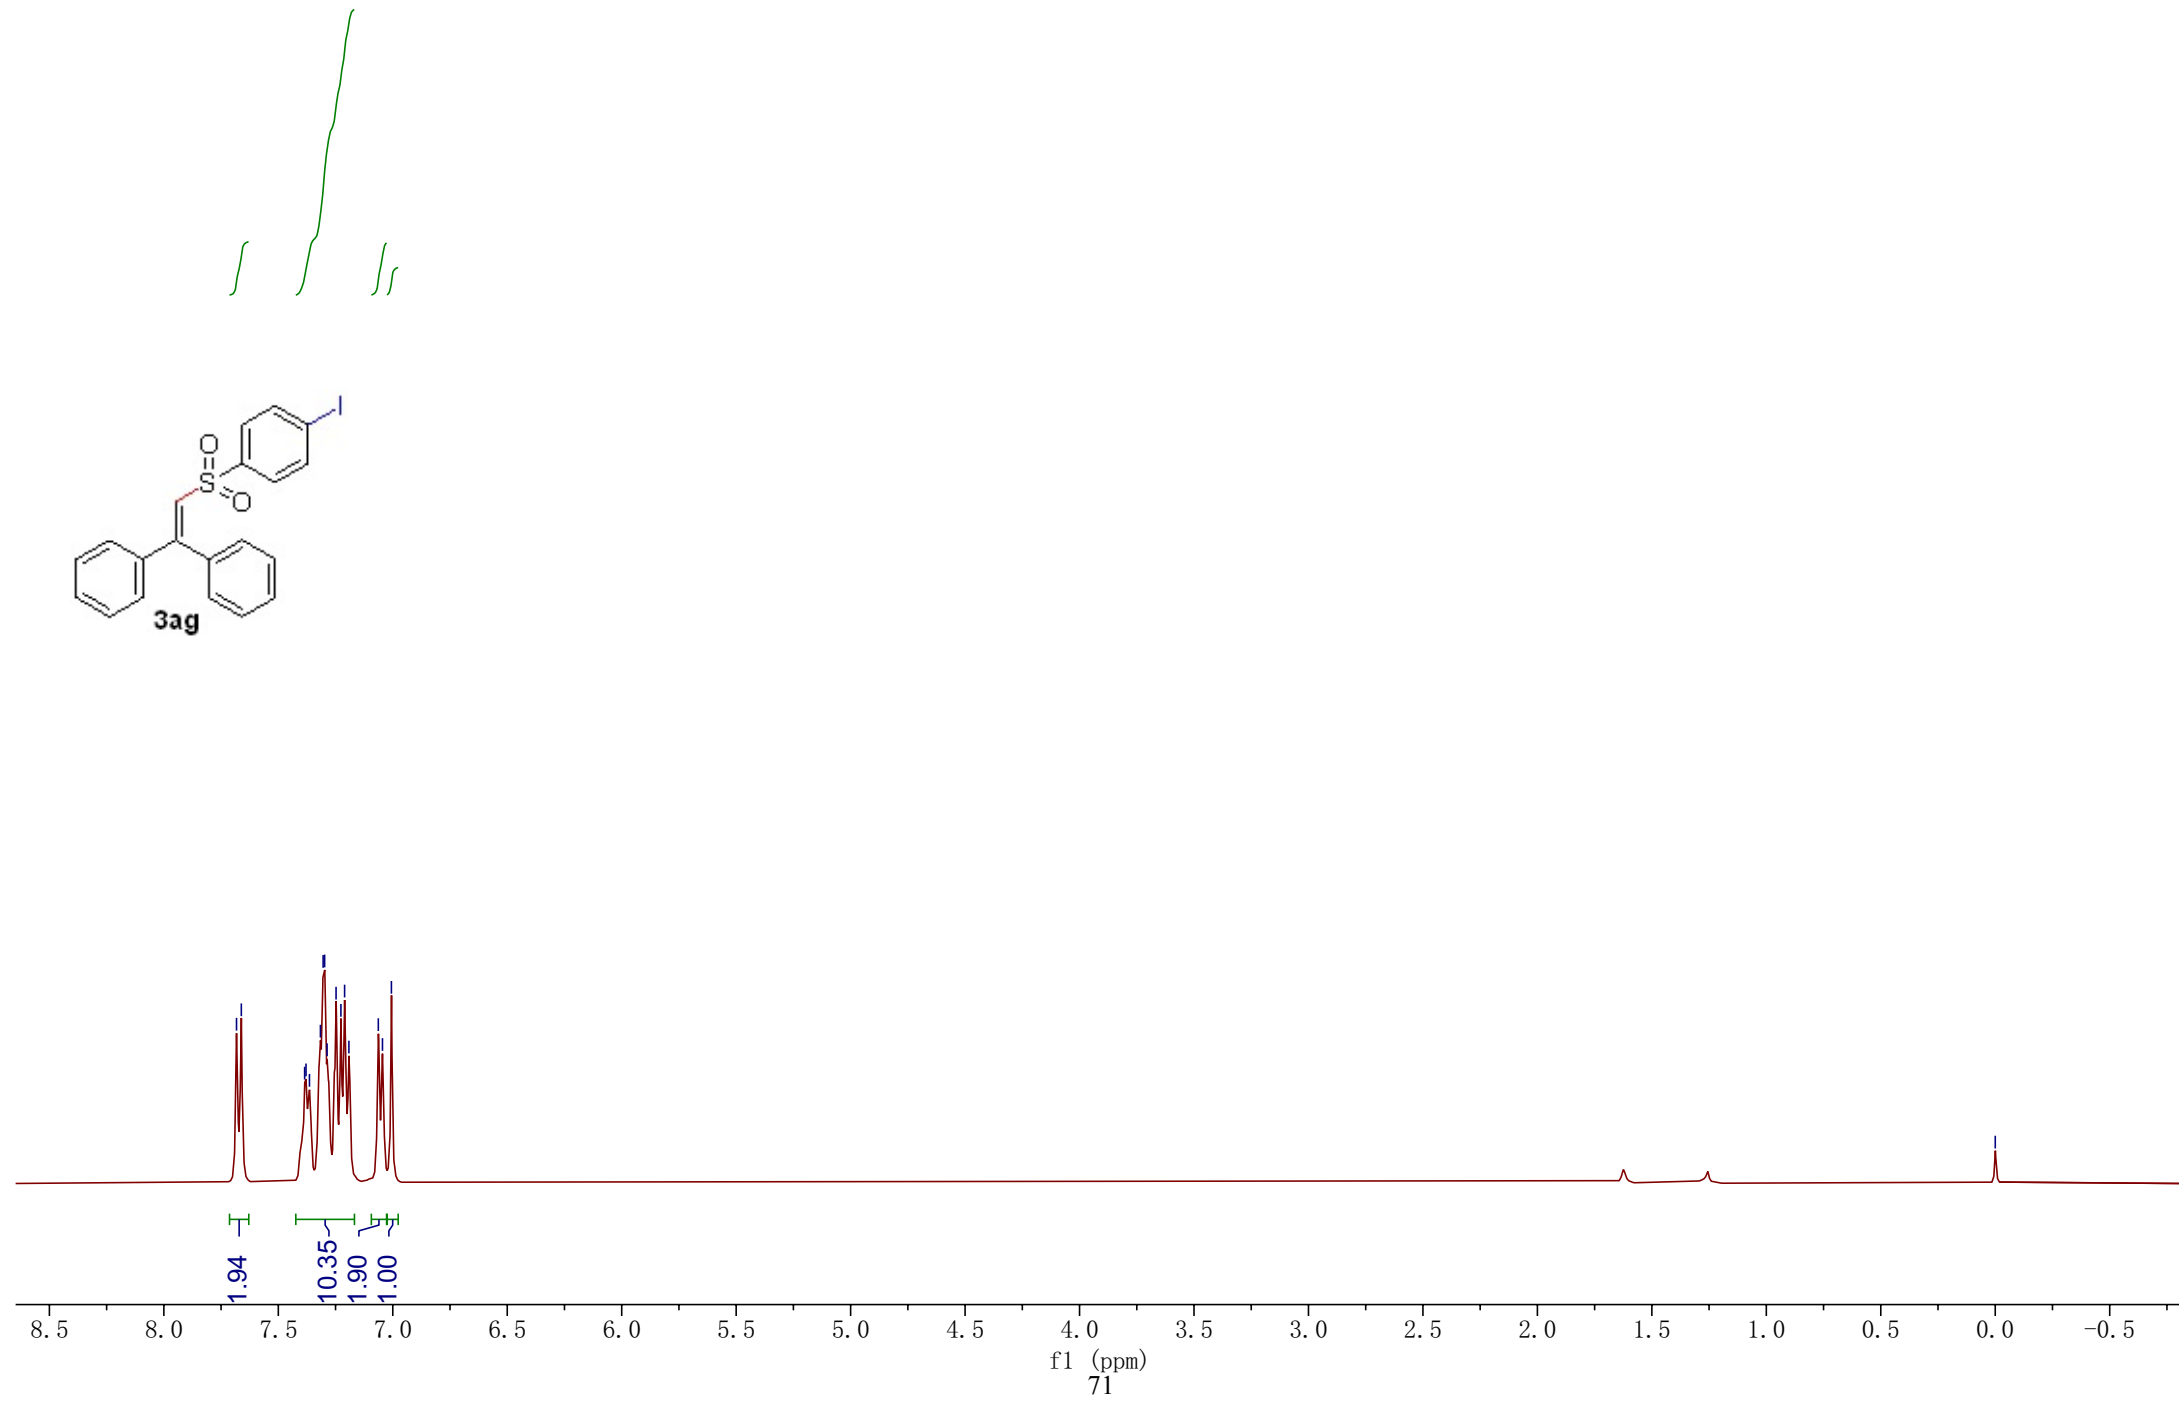

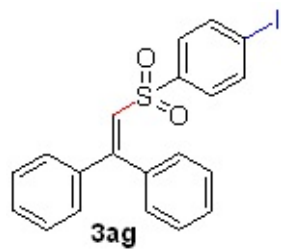

— 155.78

— 141.14  
— 138.90  
— 137.95  
— 135.42  
— 130.63  
— 129.85  
— 129.14  
— 129.12  
— 128.75  
— 128.53  
— 128.31  
— 128.02

— 100.72

— 77.48  
— 77.16  
— 76.84

— 130.63

— 129.85

— 129.14  
— 129.12

— 128.75  
— 128.53  
— 128.31

— 128.02

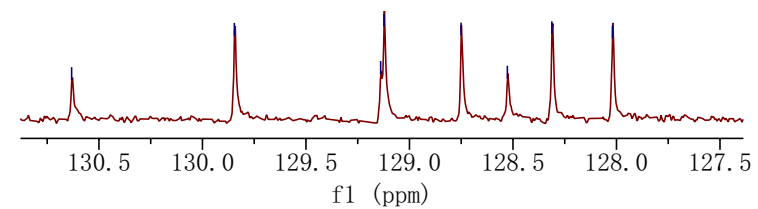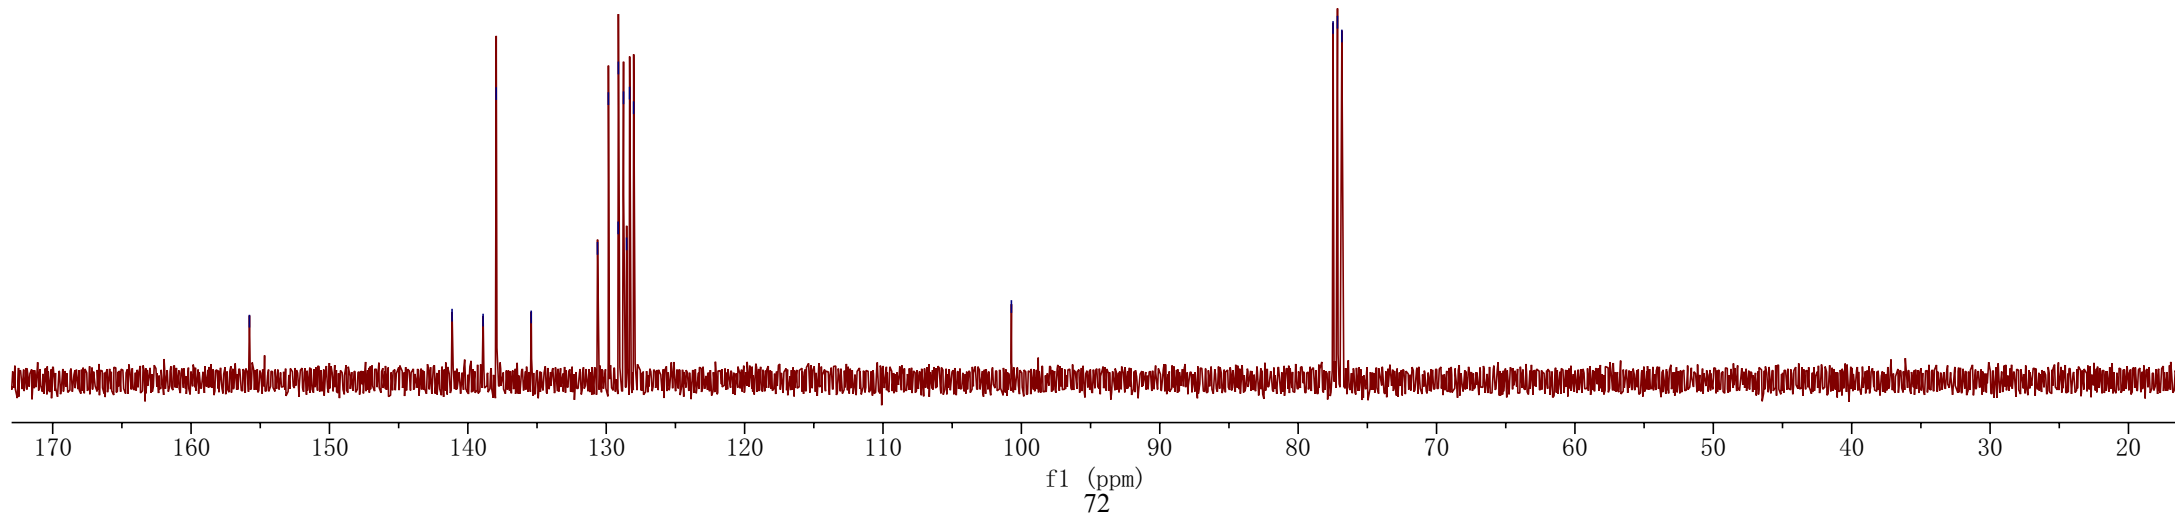



7.46  
7.44  
7.41  
7.40  
7.38  
7.38  
7.36  
7.32  
7.32  
7.30  
7.30  
7.28  
7.28  
7.21  
7.19  
7.07  
7.05  
7.02

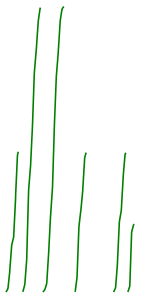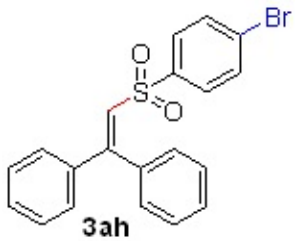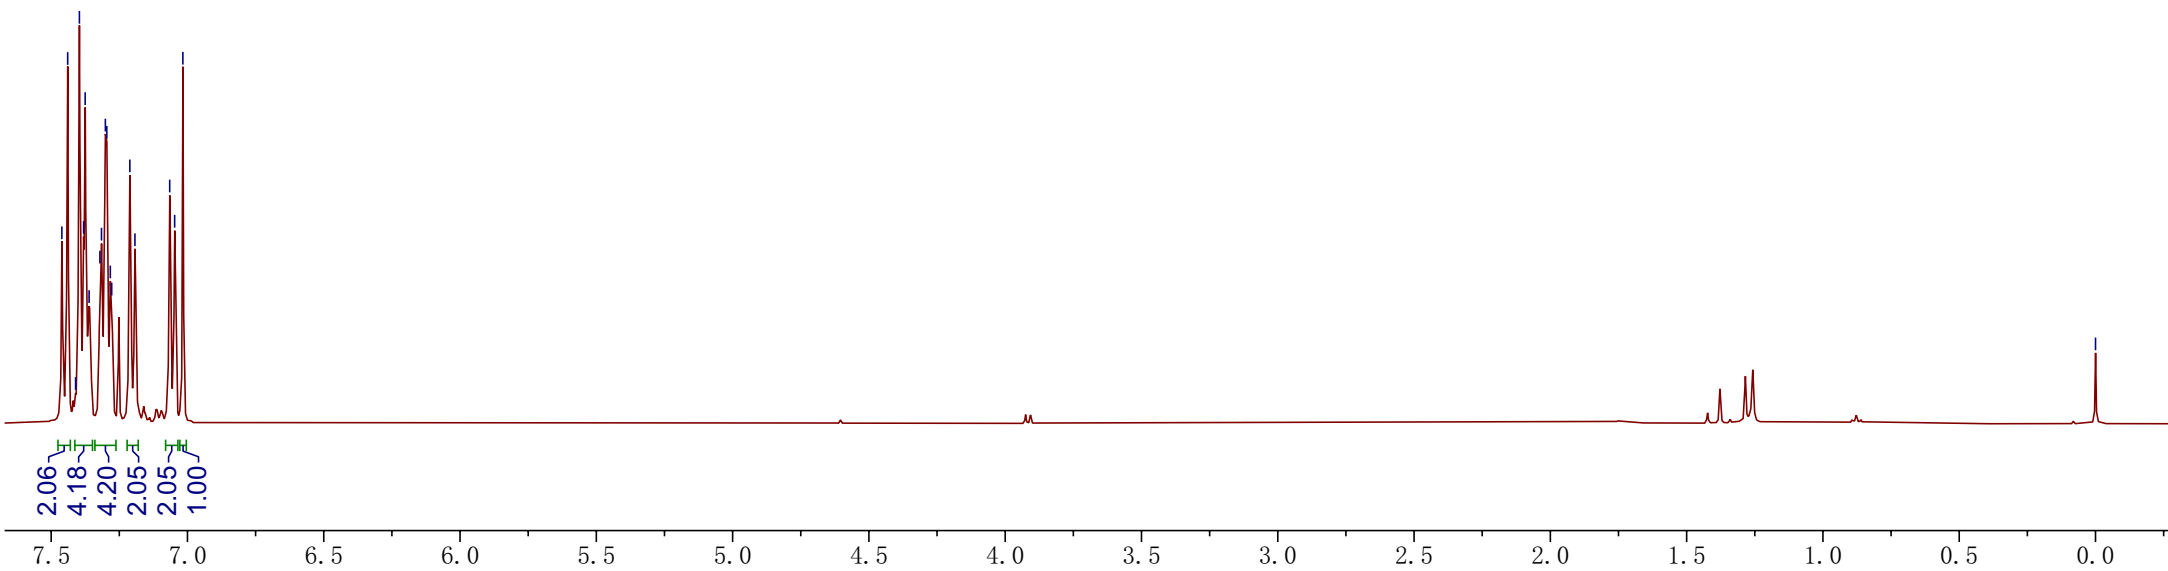

2.06  
4.18  
4.20  
2.05  
2.05  
1.00

f1 (ppm)  
73

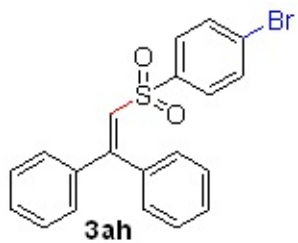

155.77  
140.45  
138.85  
135.39  
131.94  
130.61  
129.82  
129.27  
129.12  
128.86  
128.73  
128.53  
128.10  
128.00

77.48  
77.16  
76.84

131.94  
130.61  
129.82  
129.27  
129.12  
128.86  
128.73  
128.53  
128.10  
128.00

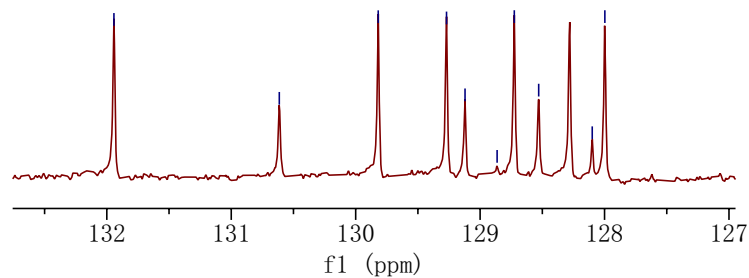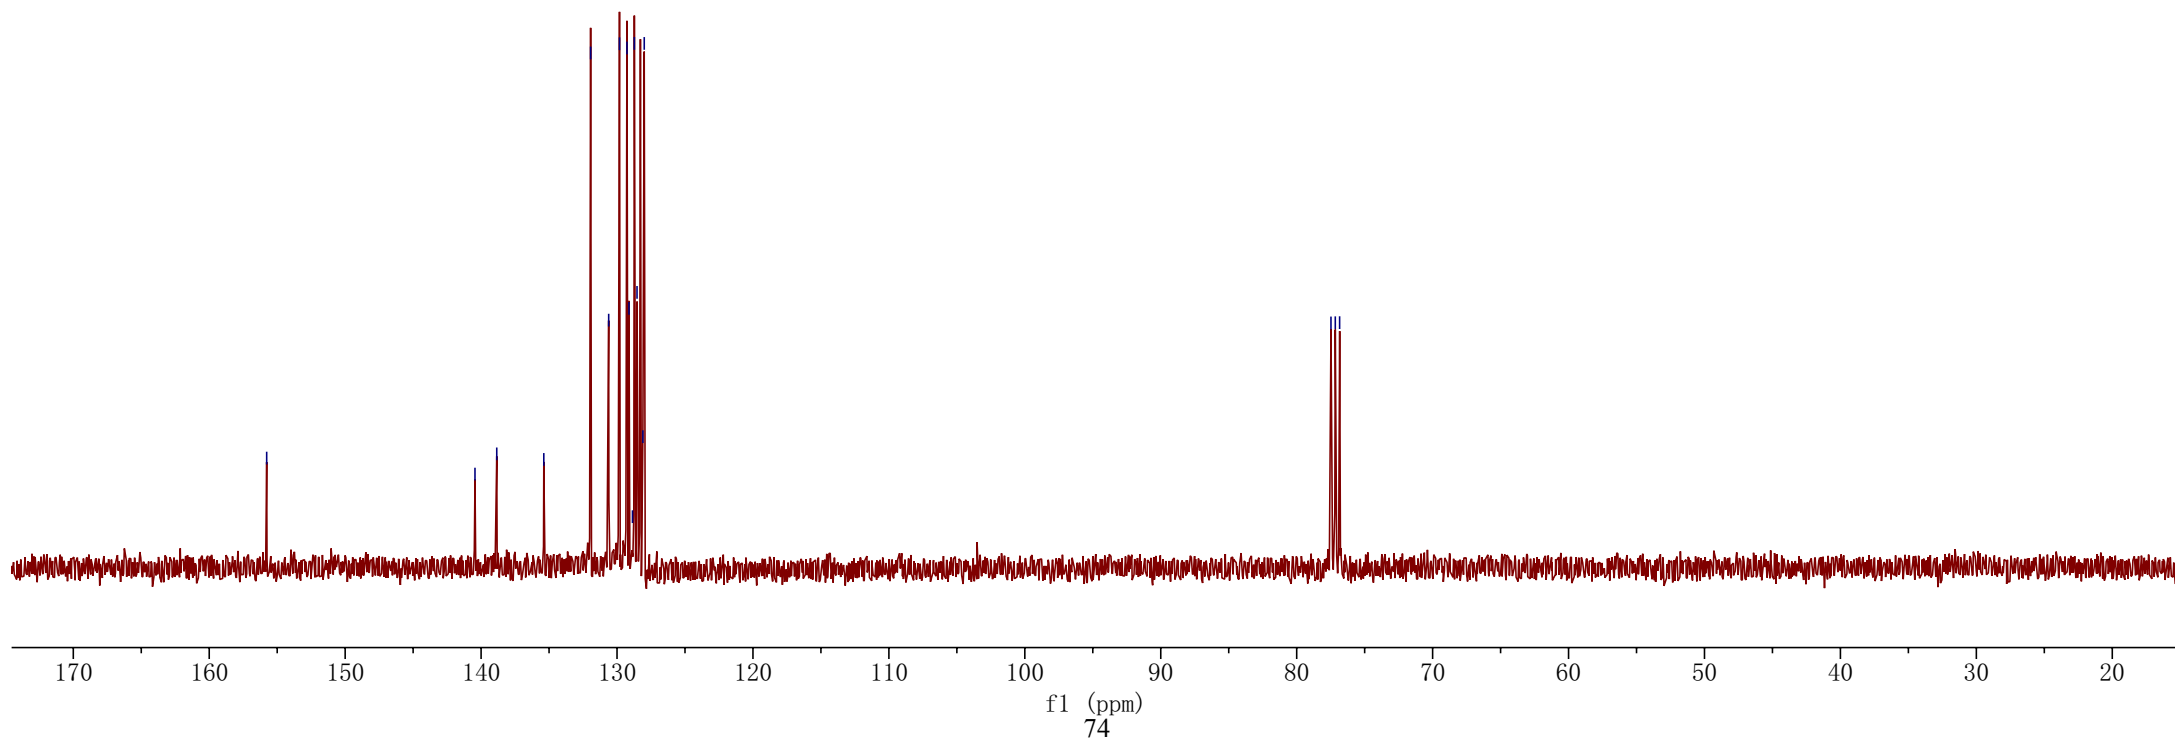

8.14  
8.12  
7.69  
7.67  
7.43  
7.41  
7.40  
7.38  
7.35  
7.33  
7.31  
7.30  
7.28  
7.26  
7.23  
7.21  
7.07  
7.04  
7.02

— 0.00

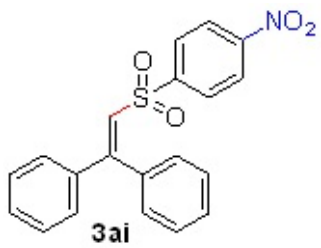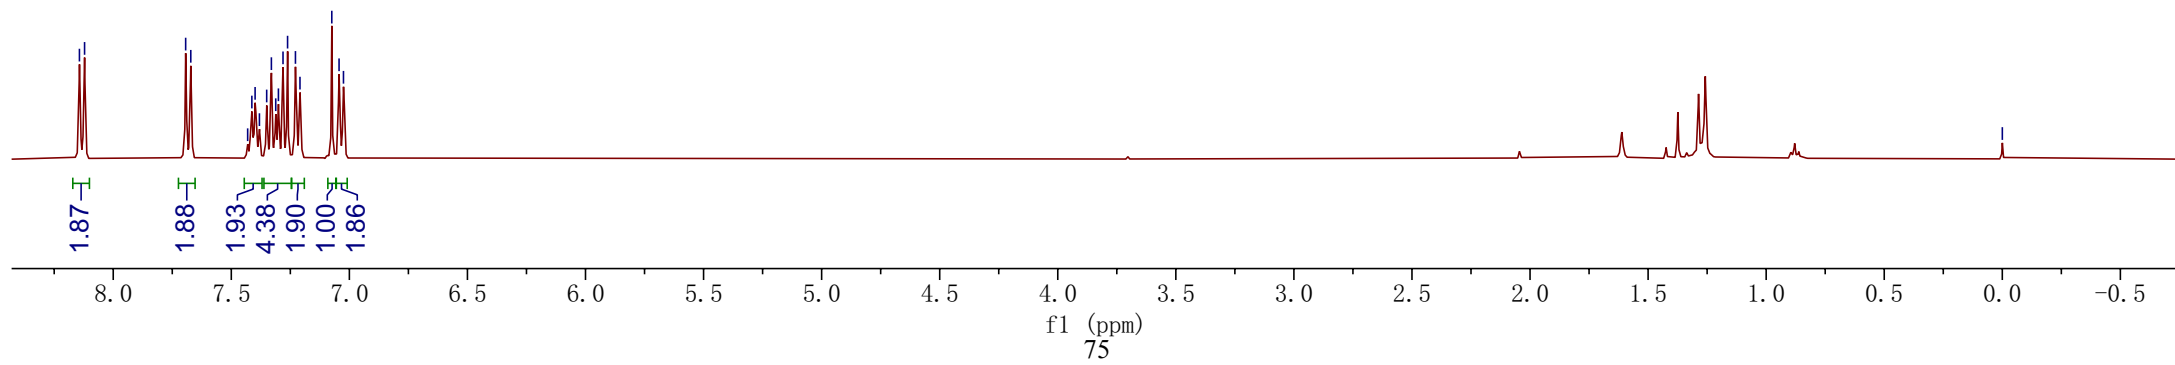

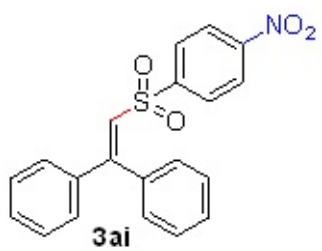

—157.21  
—150.07  
—147.04  
138.47  
135.18  
131.03  
129.90  
129.46  
129.08  
128.85  
128.38  
128.13  
127.77  
123.76

77.48  
77.16  
76.84

—131.03  
—129.90  
—129.46  
—129.08  
—128.85  
—128.38  
—128.13  
—127.77

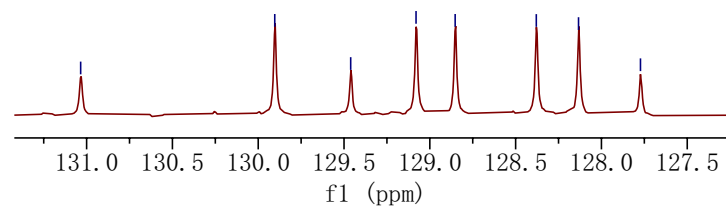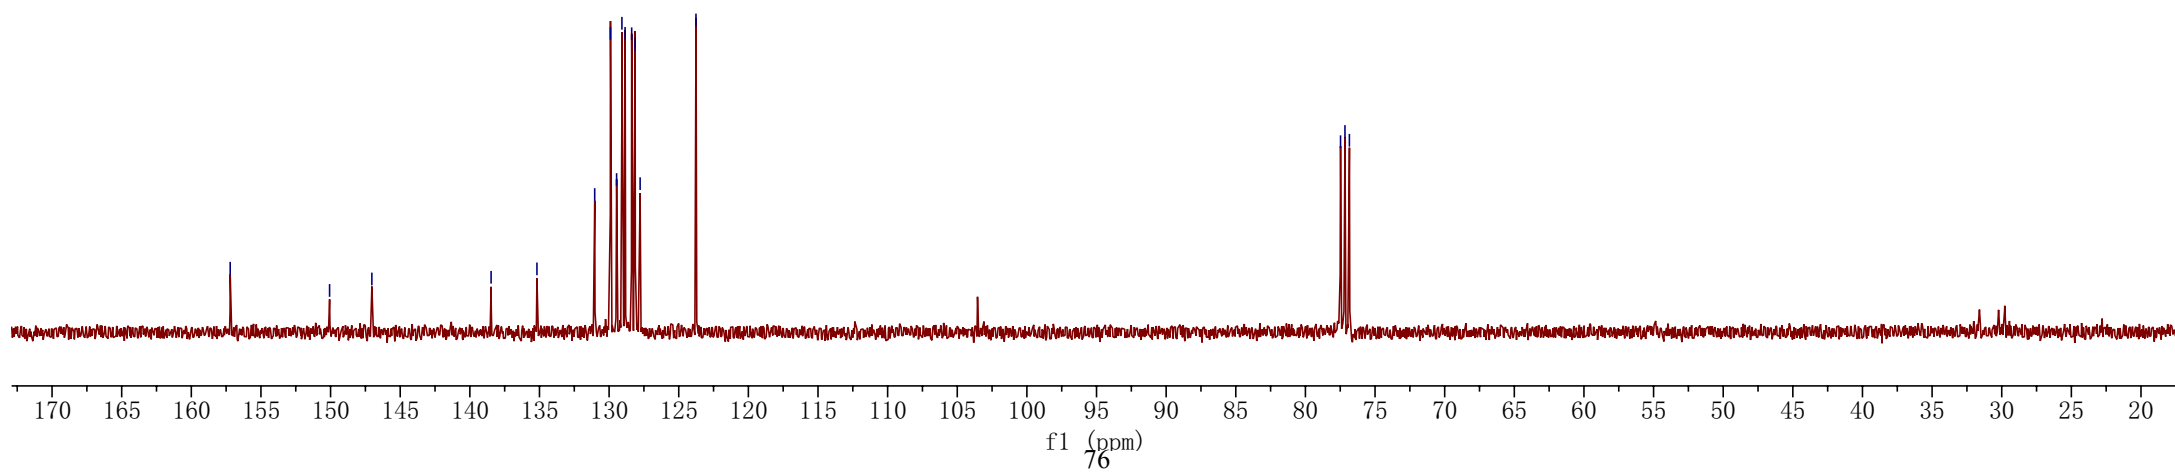

7.66  
7.64  
7.57  
7.55  
7.40  
7.37  
7.35  
7.34  
7.32  
7.30  
7.28  
7.26  
7.24  
7.22  
7.21  
7.06  
7.03  
7.02

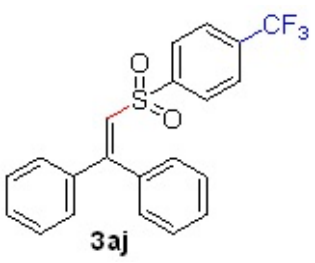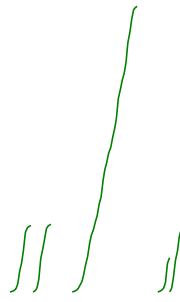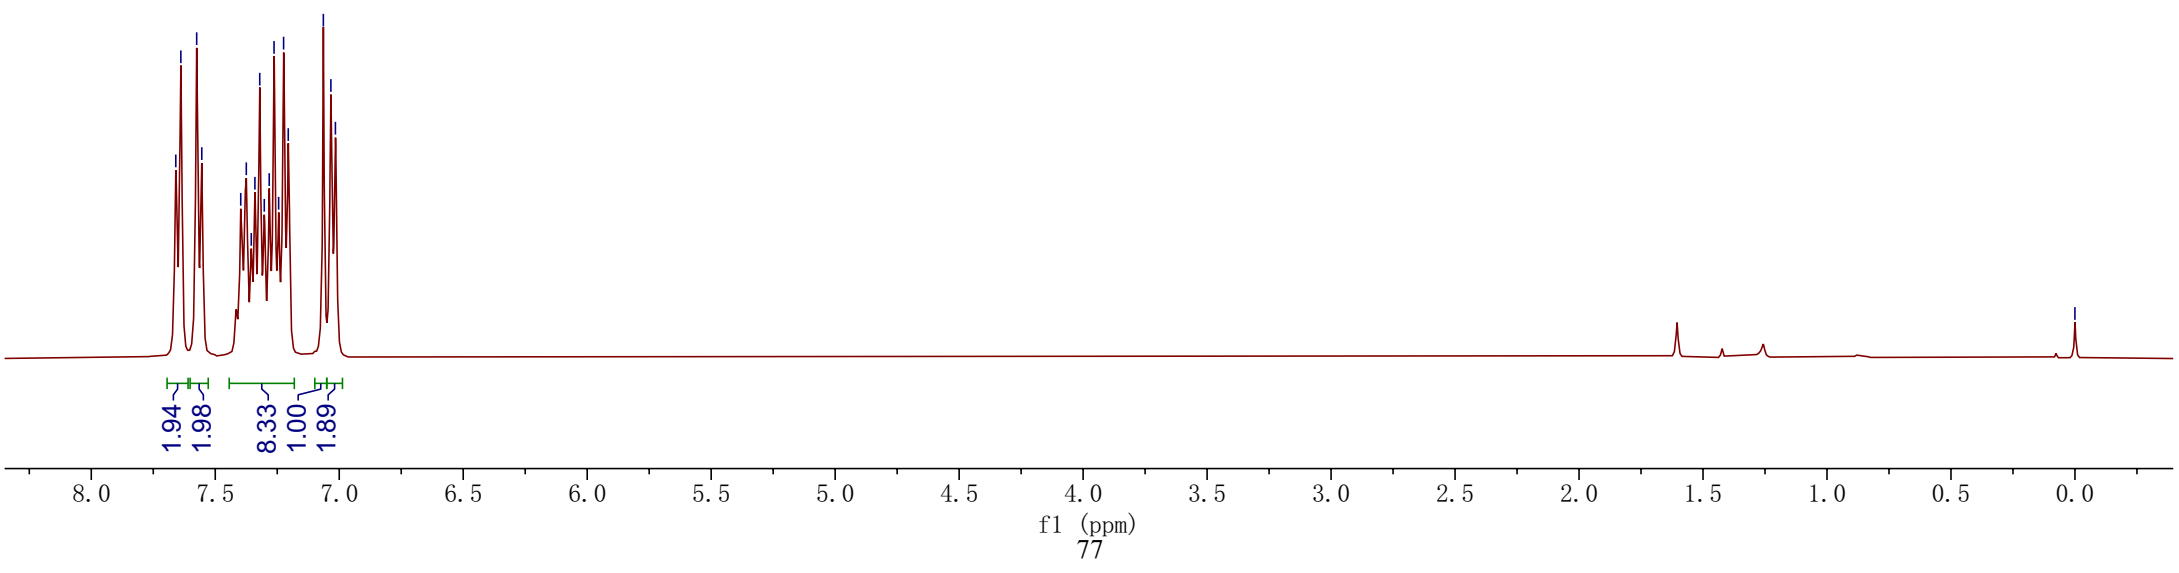

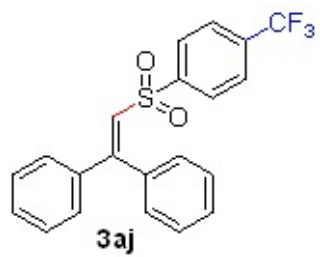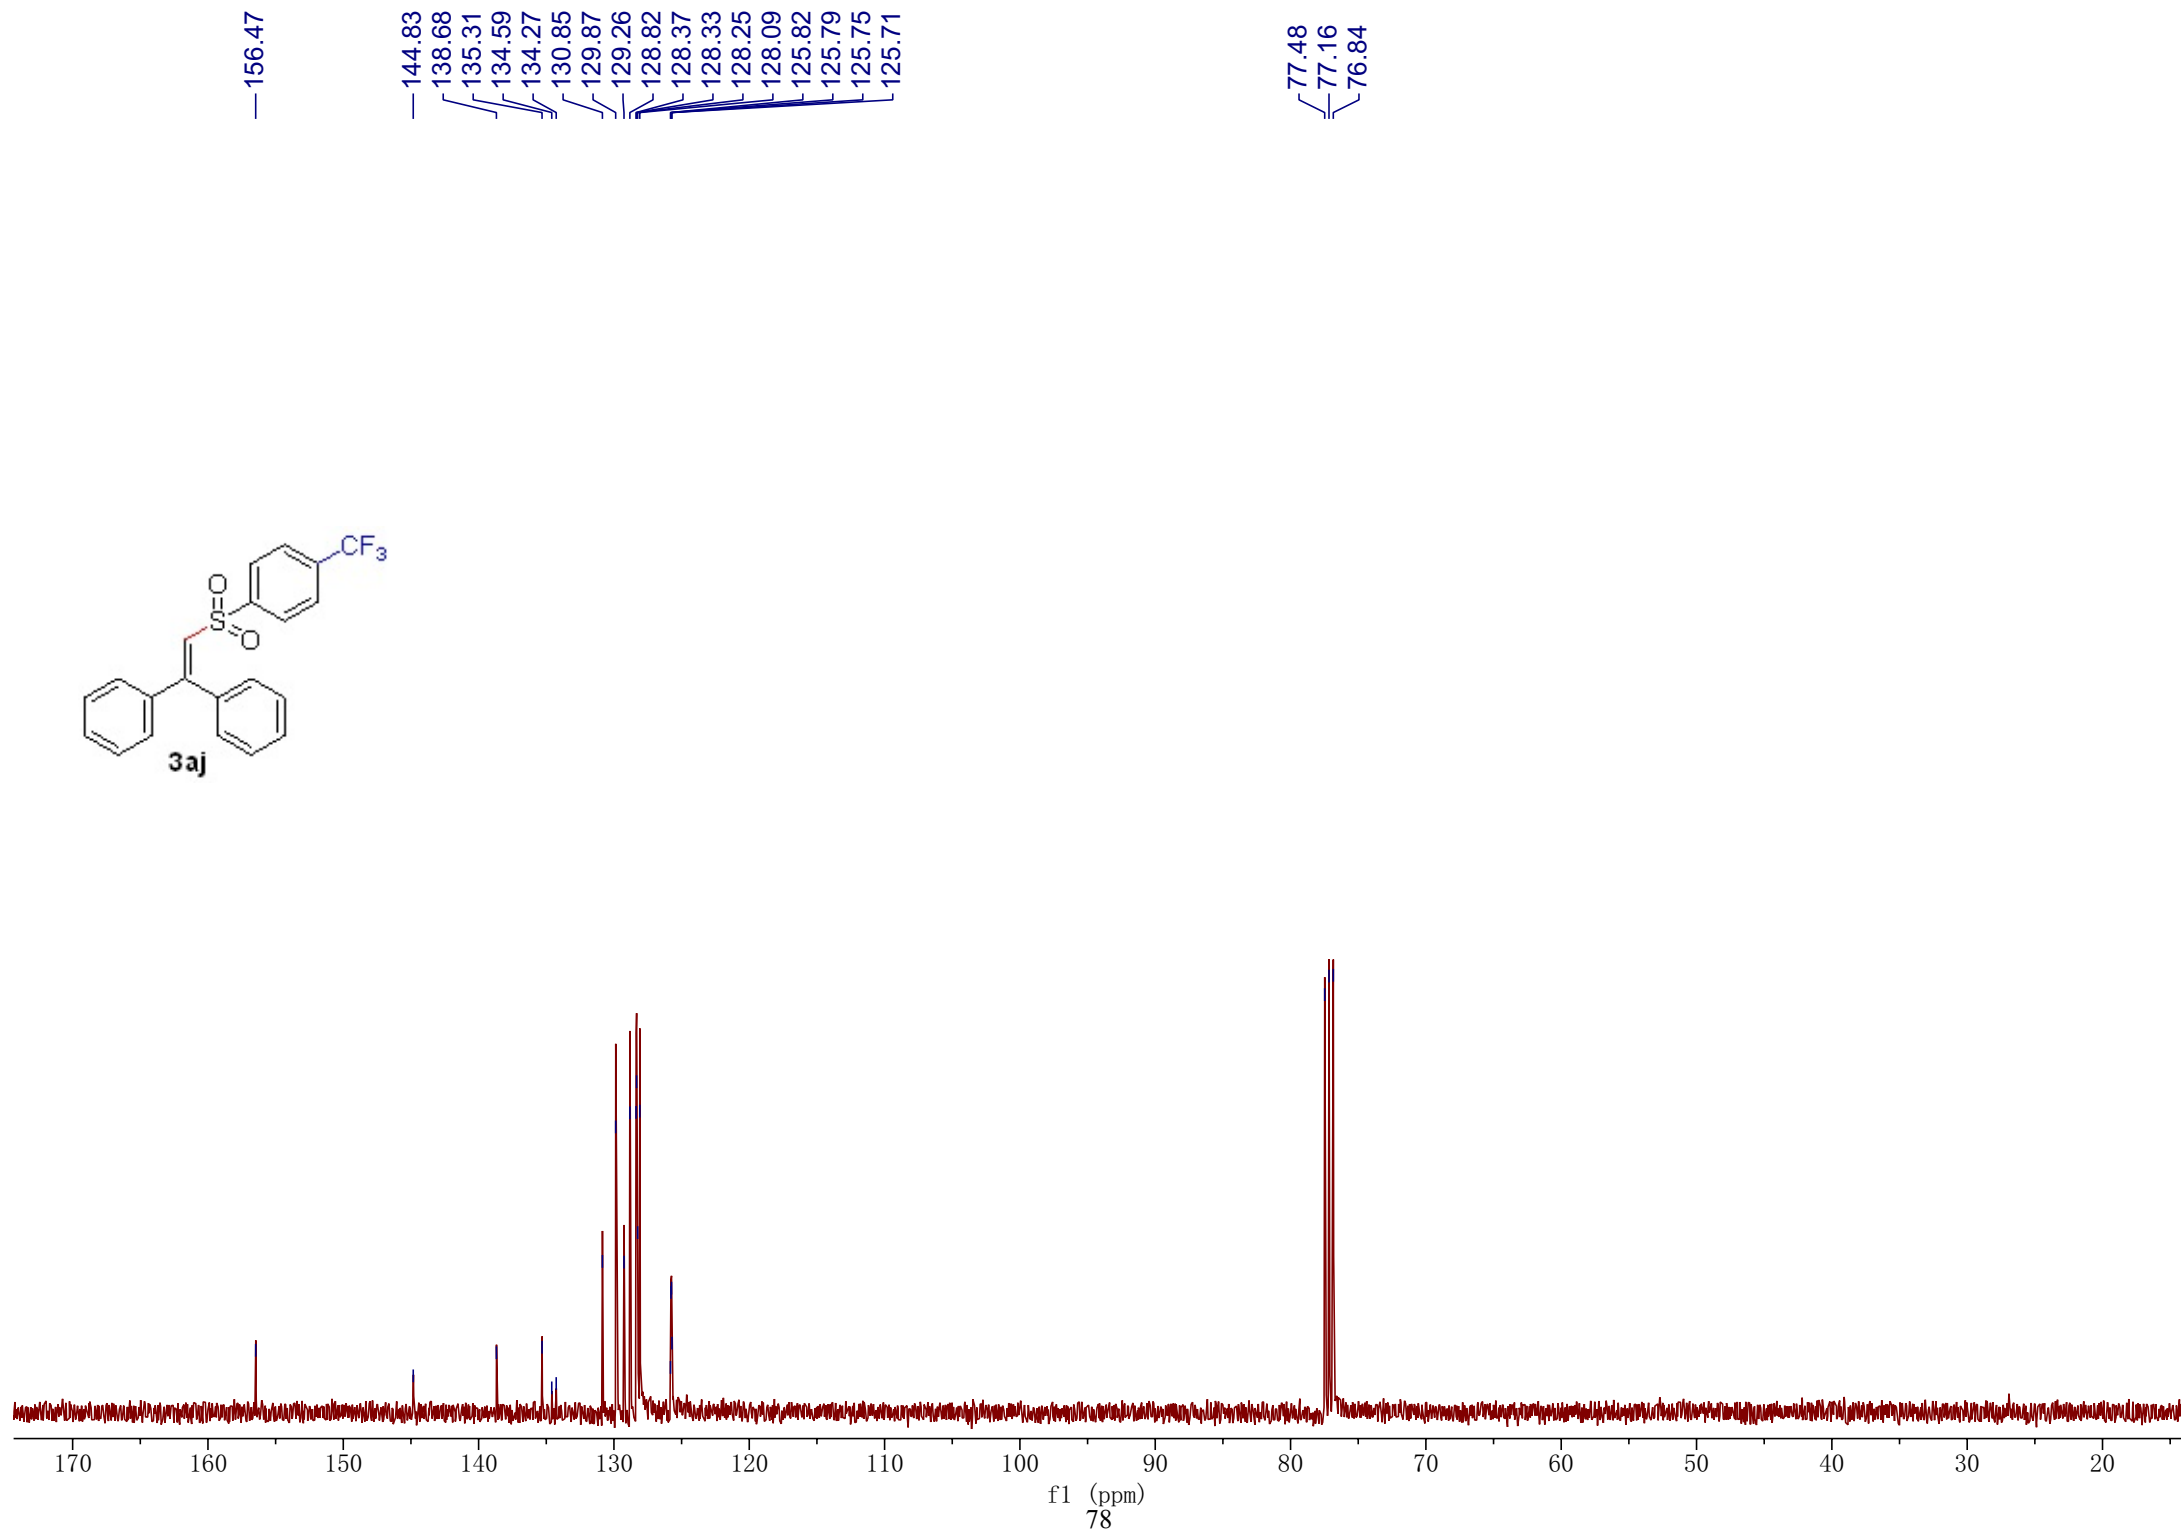

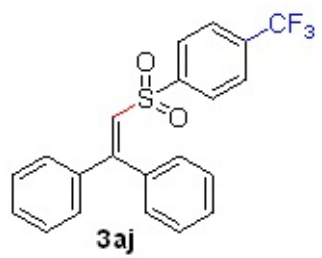

—63.25

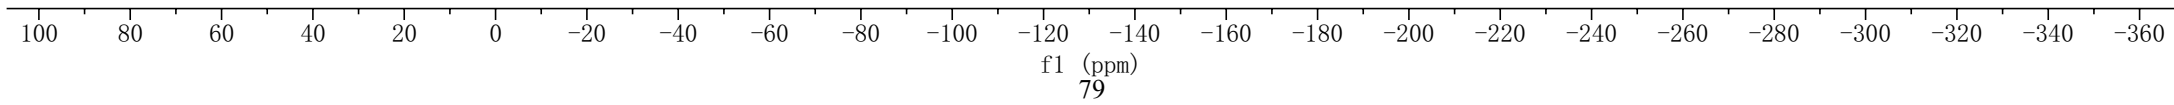

7.48  
7.47  
7.46  
7.46  
7.44  
7.44  
7.42  
7.41  
7.40  
7.39  
7.38  
7.38  
7.37  
7.34  
7.32  
7.30  
7.28  
7.23  
7.22  
7.21  
7.06  
7.04

—0.00

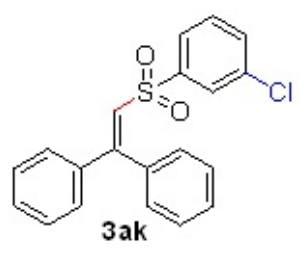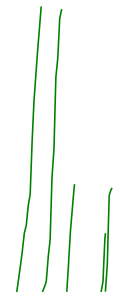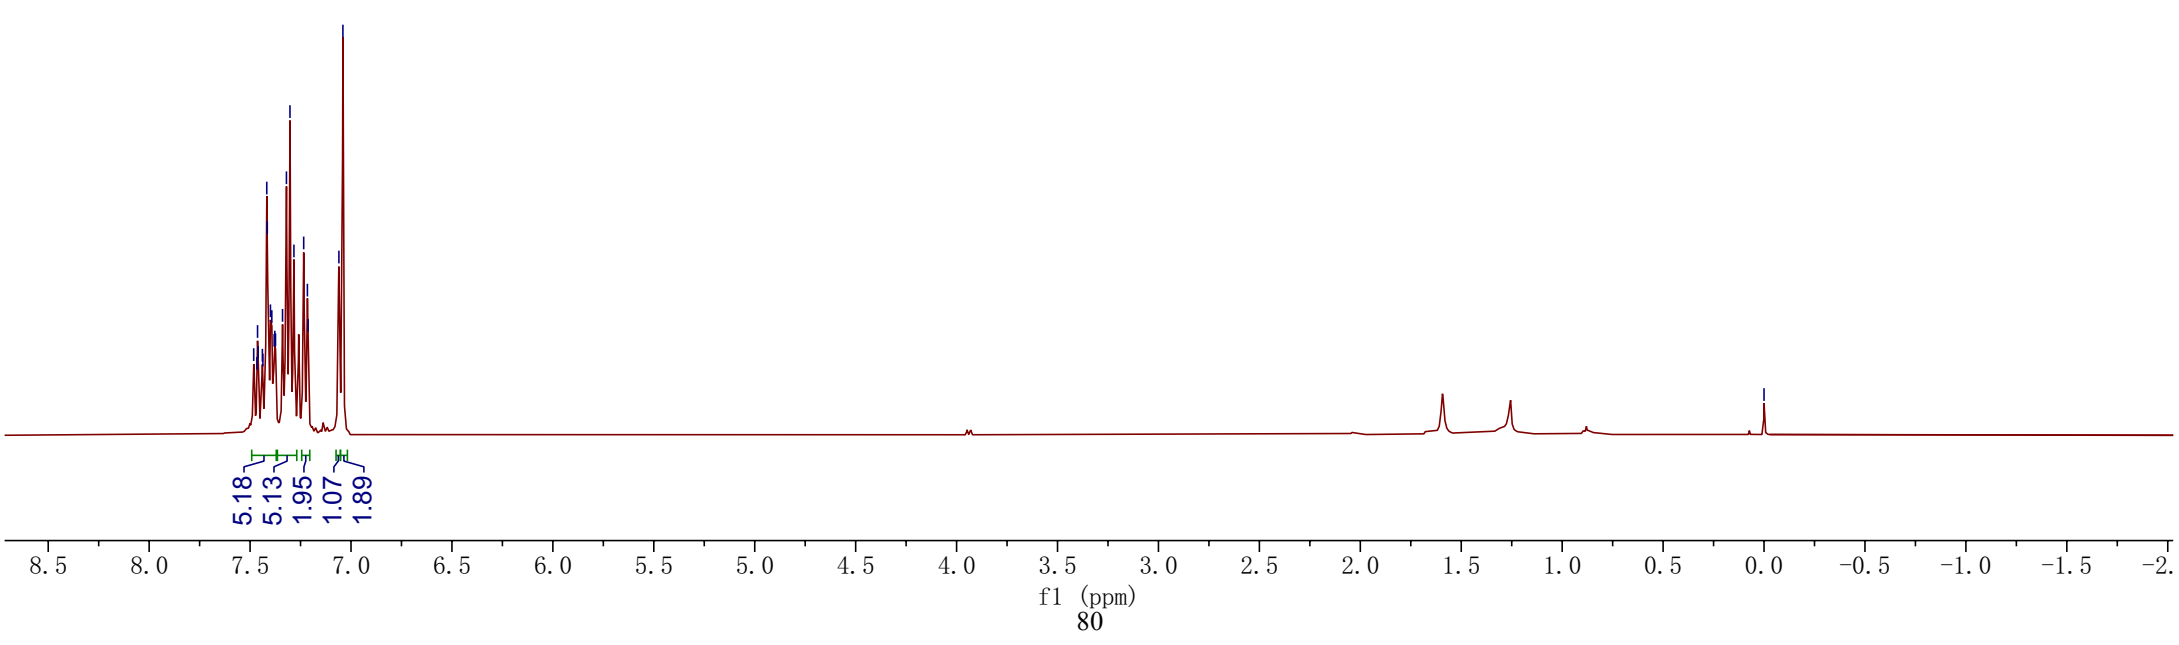



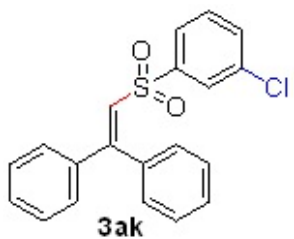

— 156.19

— 143.17  
— 138.83  
— 135.20  
— 134.91  
— 133.07  
— 130.73  
— 130.05  
— 129.84  
— 129.35  
— 128.80  
— 128.53  
— 128.35  
— 128.17  
— 128.06  
— 125.87

— 77.48  
— 77.16  
— 76.84

— 130.73

— 130.05

— 129.84

— 129.35

— 128.80

— 128.53

— 128.35

— 128.17

— 128.06

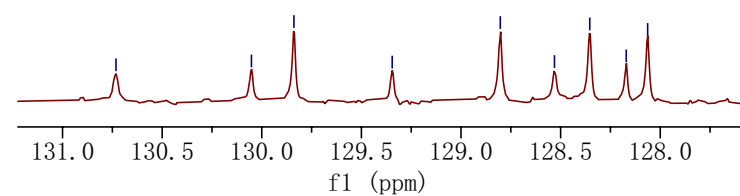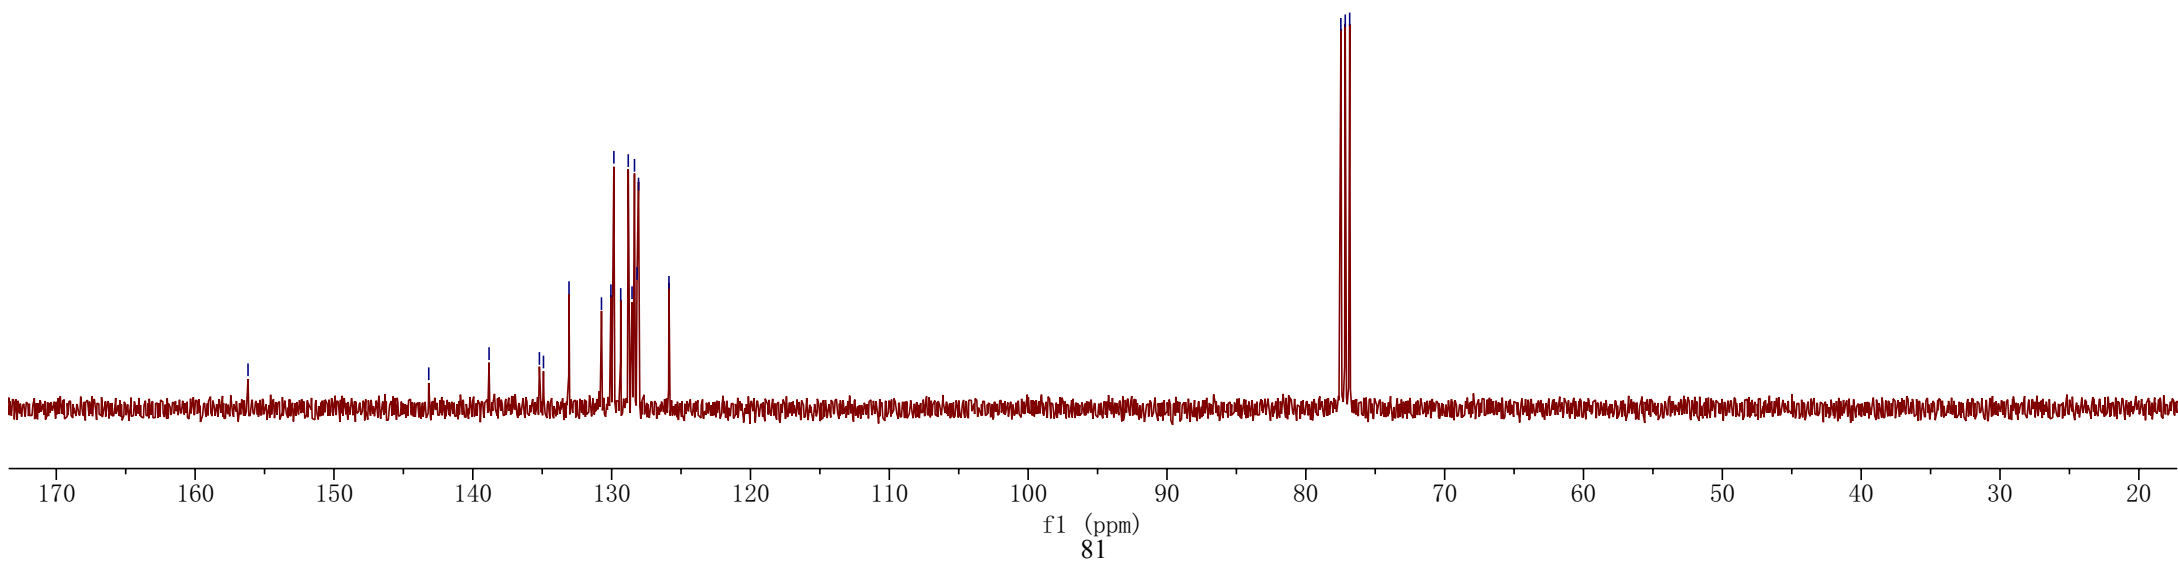

7.41  
7.34  
7.33  
7.32  
7.31  
7.30  
7.26  
7.26  
7.25  
7.24  
7.24  
7.23  
7.22  
7.21  
7.19  
7.18  
7.17  
7.16  
7.15  
7.06  
7.01  
7.01  
7.00  
6.99  
6.99  
6.98

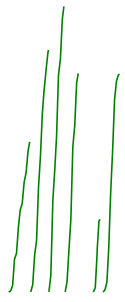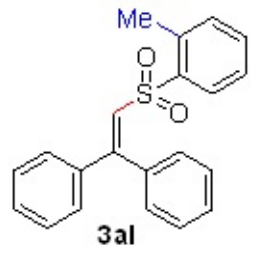

—2.65

—0.00

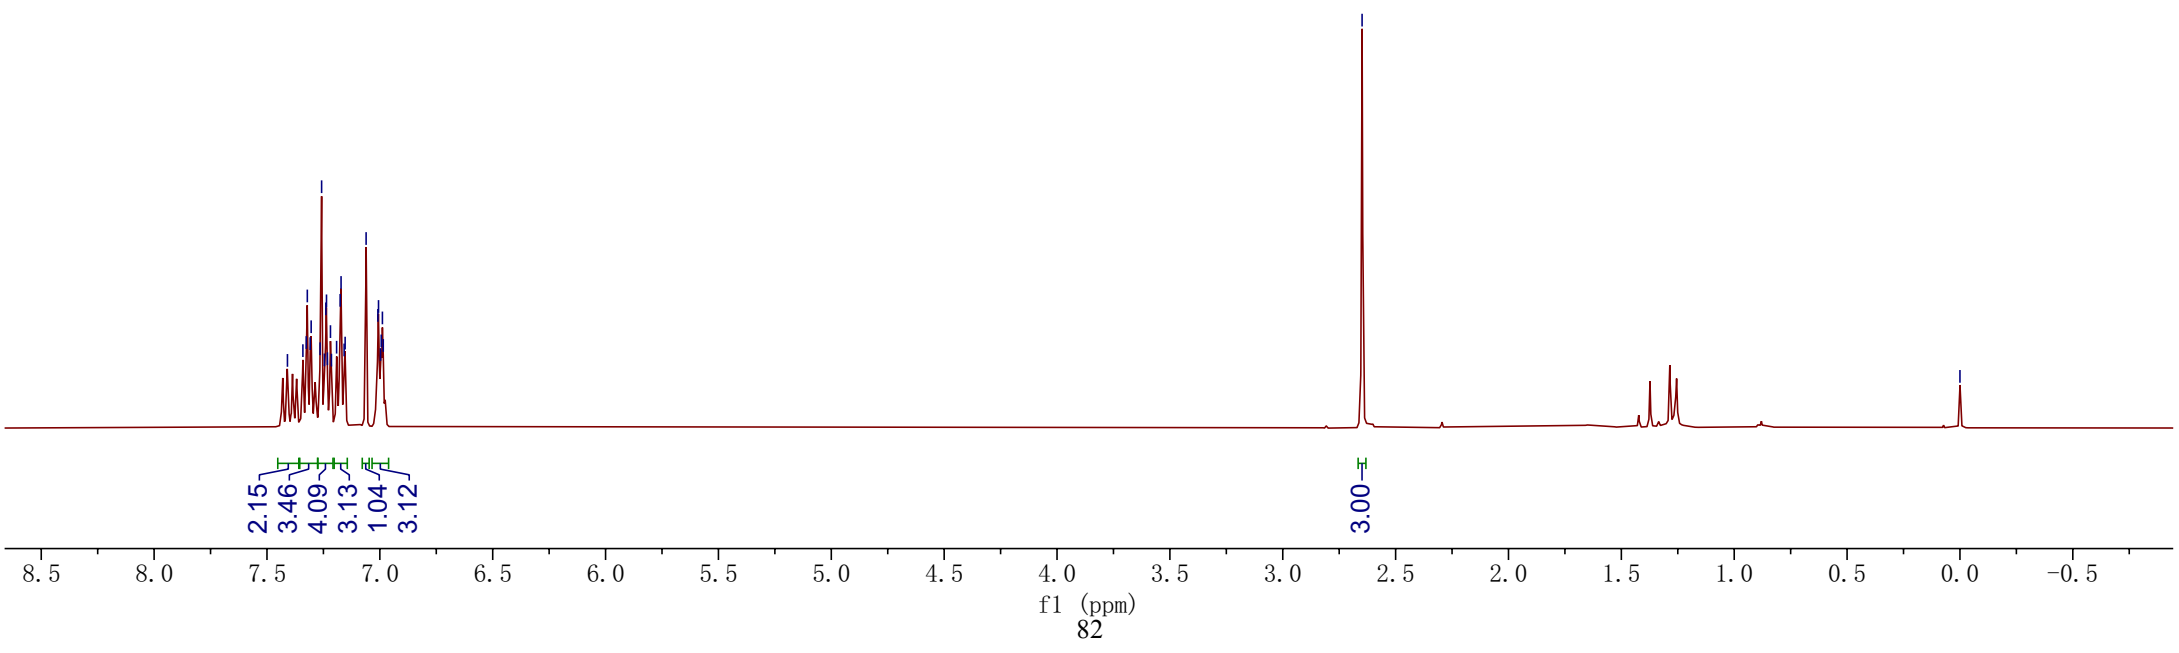

2.15  
3.46  
4.09  
3.13  
1.04  
3.12

3.00

f1 (ppm)  
82

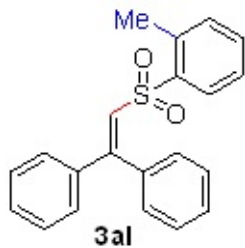

139.23  
137.23  
135.37  
132.88  
131.97  
130.47  
129.67  
129.50  
128.95  
128.87  
128.80  
128.30  
127.87  
126.01

77.48  
77.16  
76.84

20.70

130.47

129.67

129.50

128.95

128.87

128.80

128.30

127.87

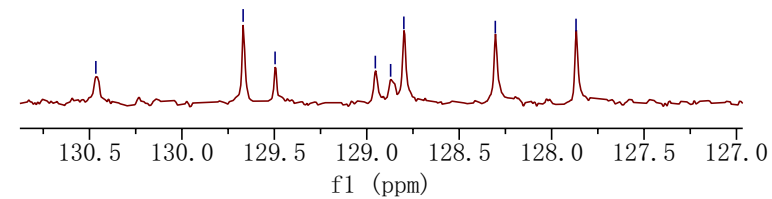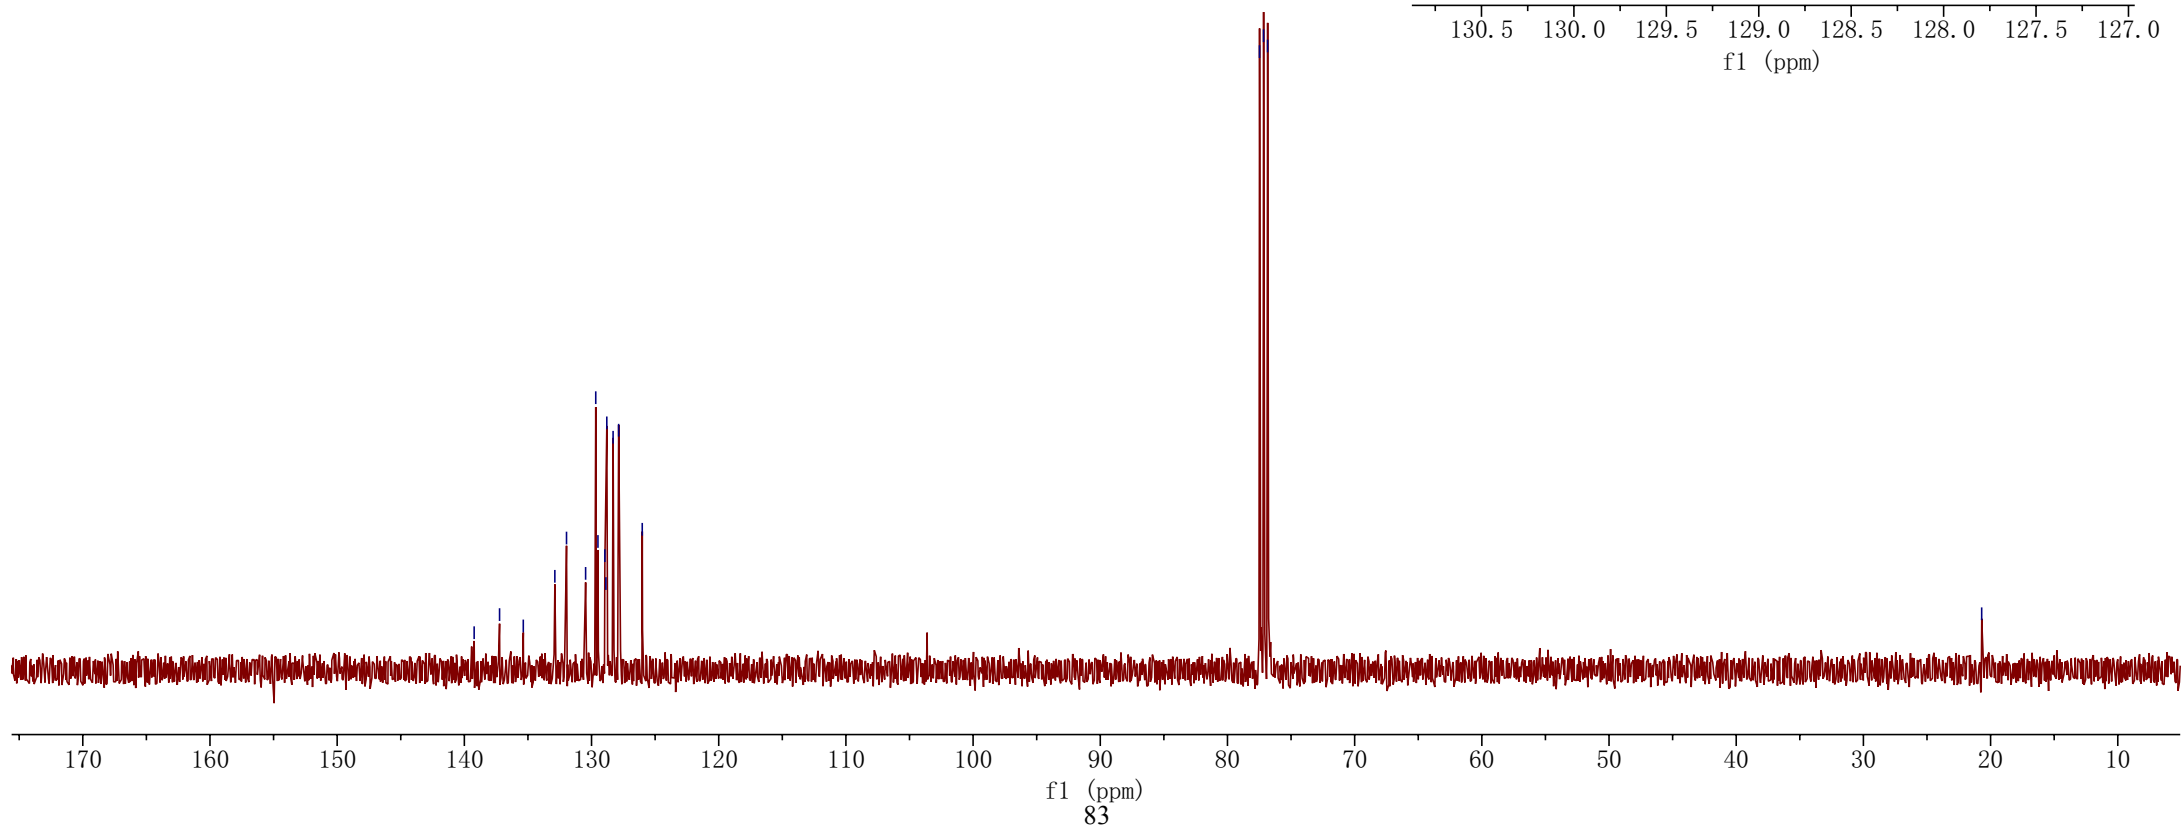

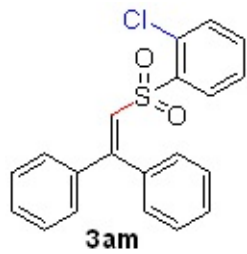

7.35  
7.34  
7.29  
7.28  
7.26  
7.18  
7.13  
7.00  
6.99  
6.98

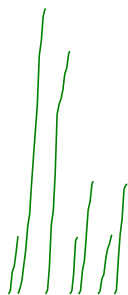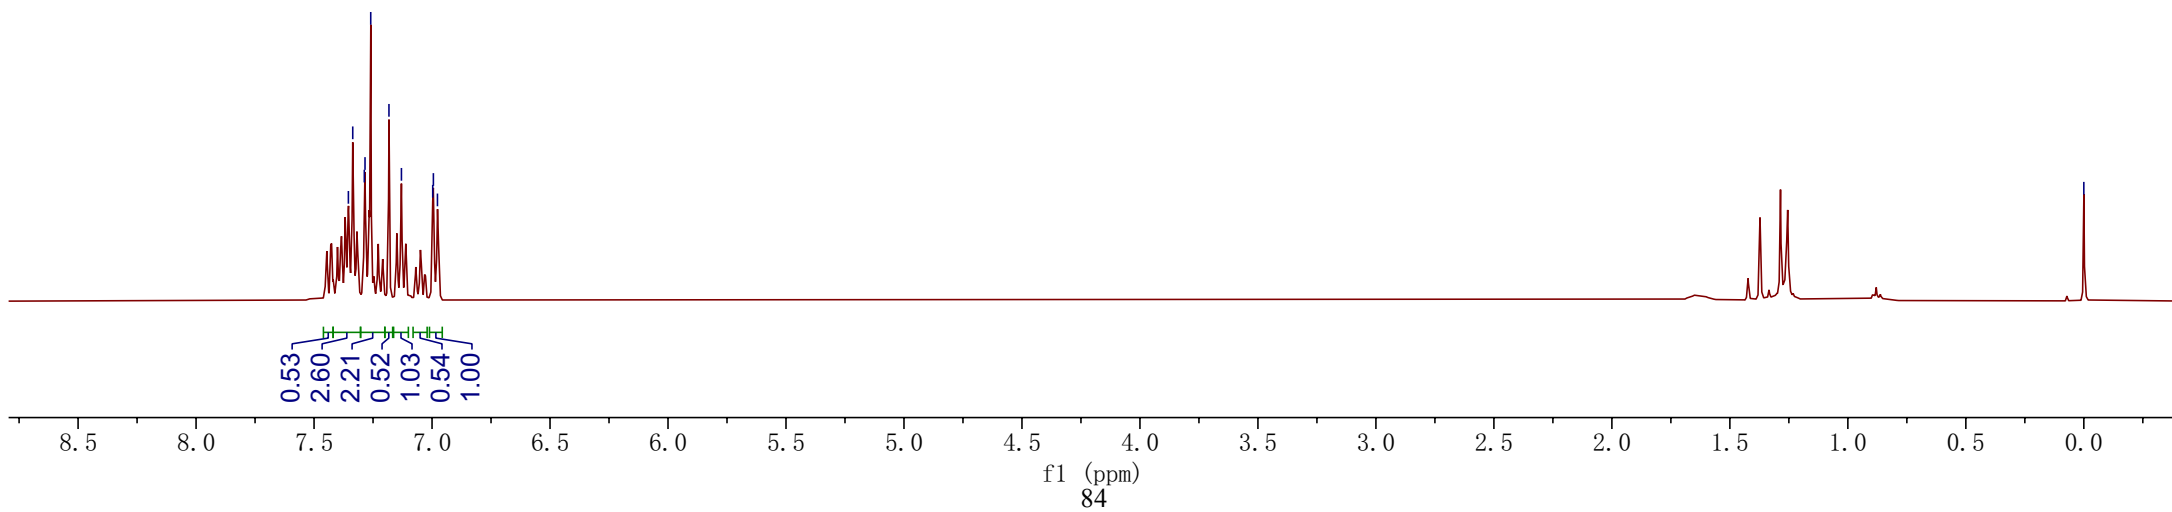

—0.00

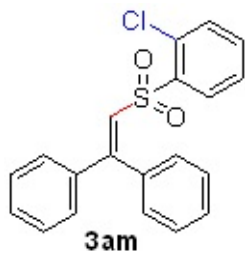

155.41  
139.13  
135.33  
133.75  
132.21  
131.18  
130.97  
130.55  
129.60  
128.96  
128.77  
128.46  
128.24  
127.79  
126.74

77.48  
77.16  
76.84

131.18  
130.97  
130.55  
129.60  
128.96  
128.77  
128.46  
128.24  
127.79  
126.74

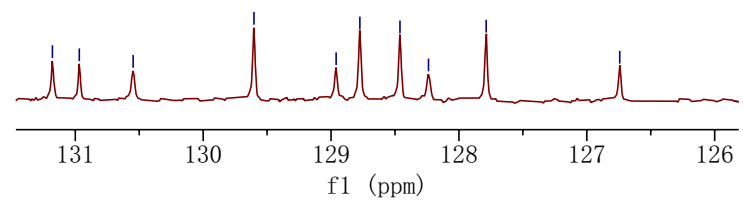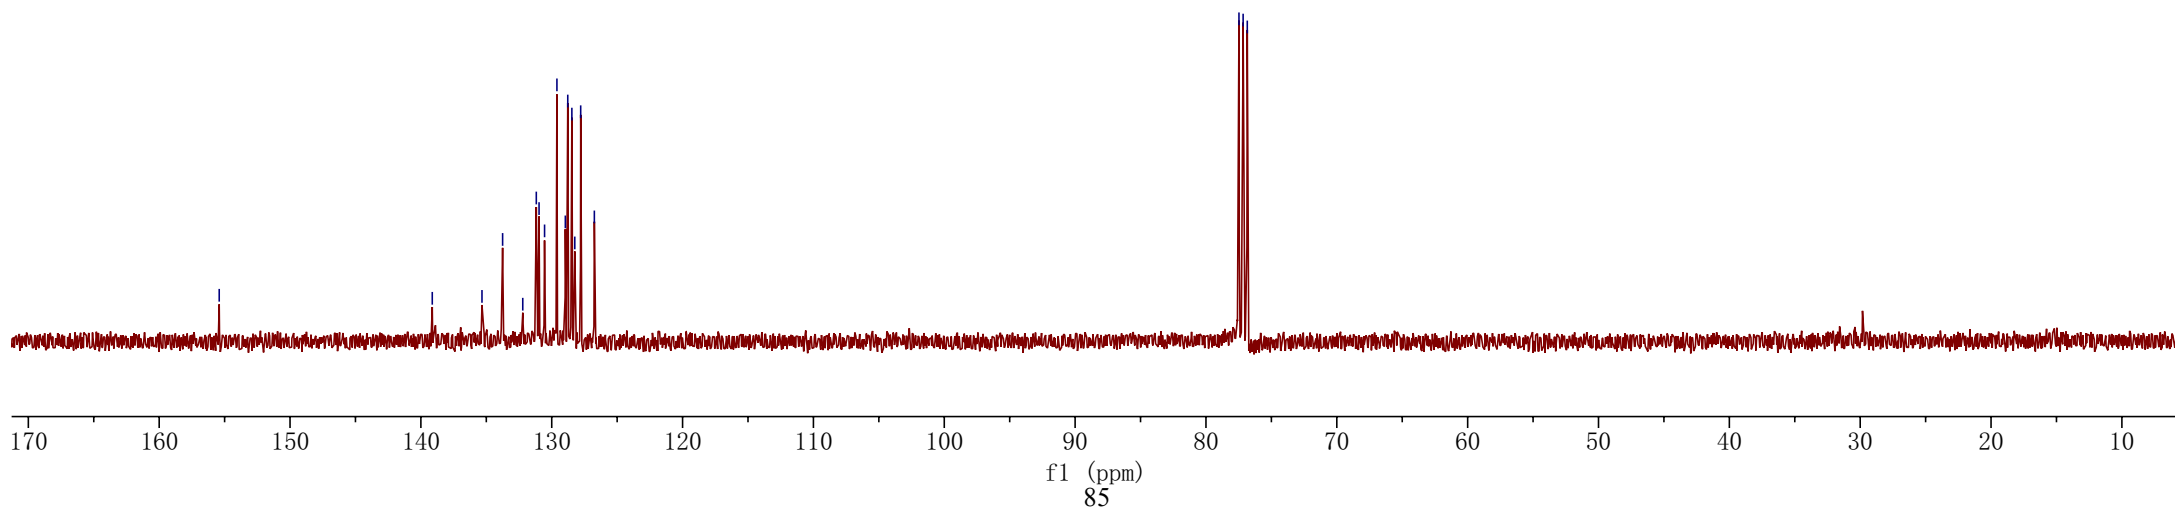

7.37  
7.35  
7.33  
7.31  
7.29  
7.29  
7.27  
7.26  
7.25  
7.22  
7.20  
7.19  
7.17  
7.06  
6.99  
6.97  
6.75

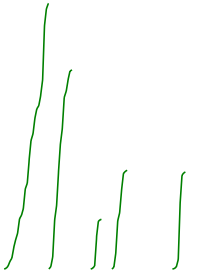

-2.44

-2.24

-0.00

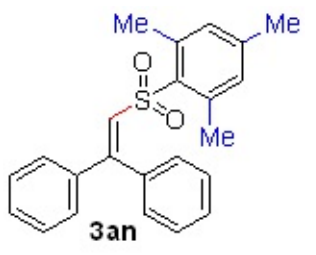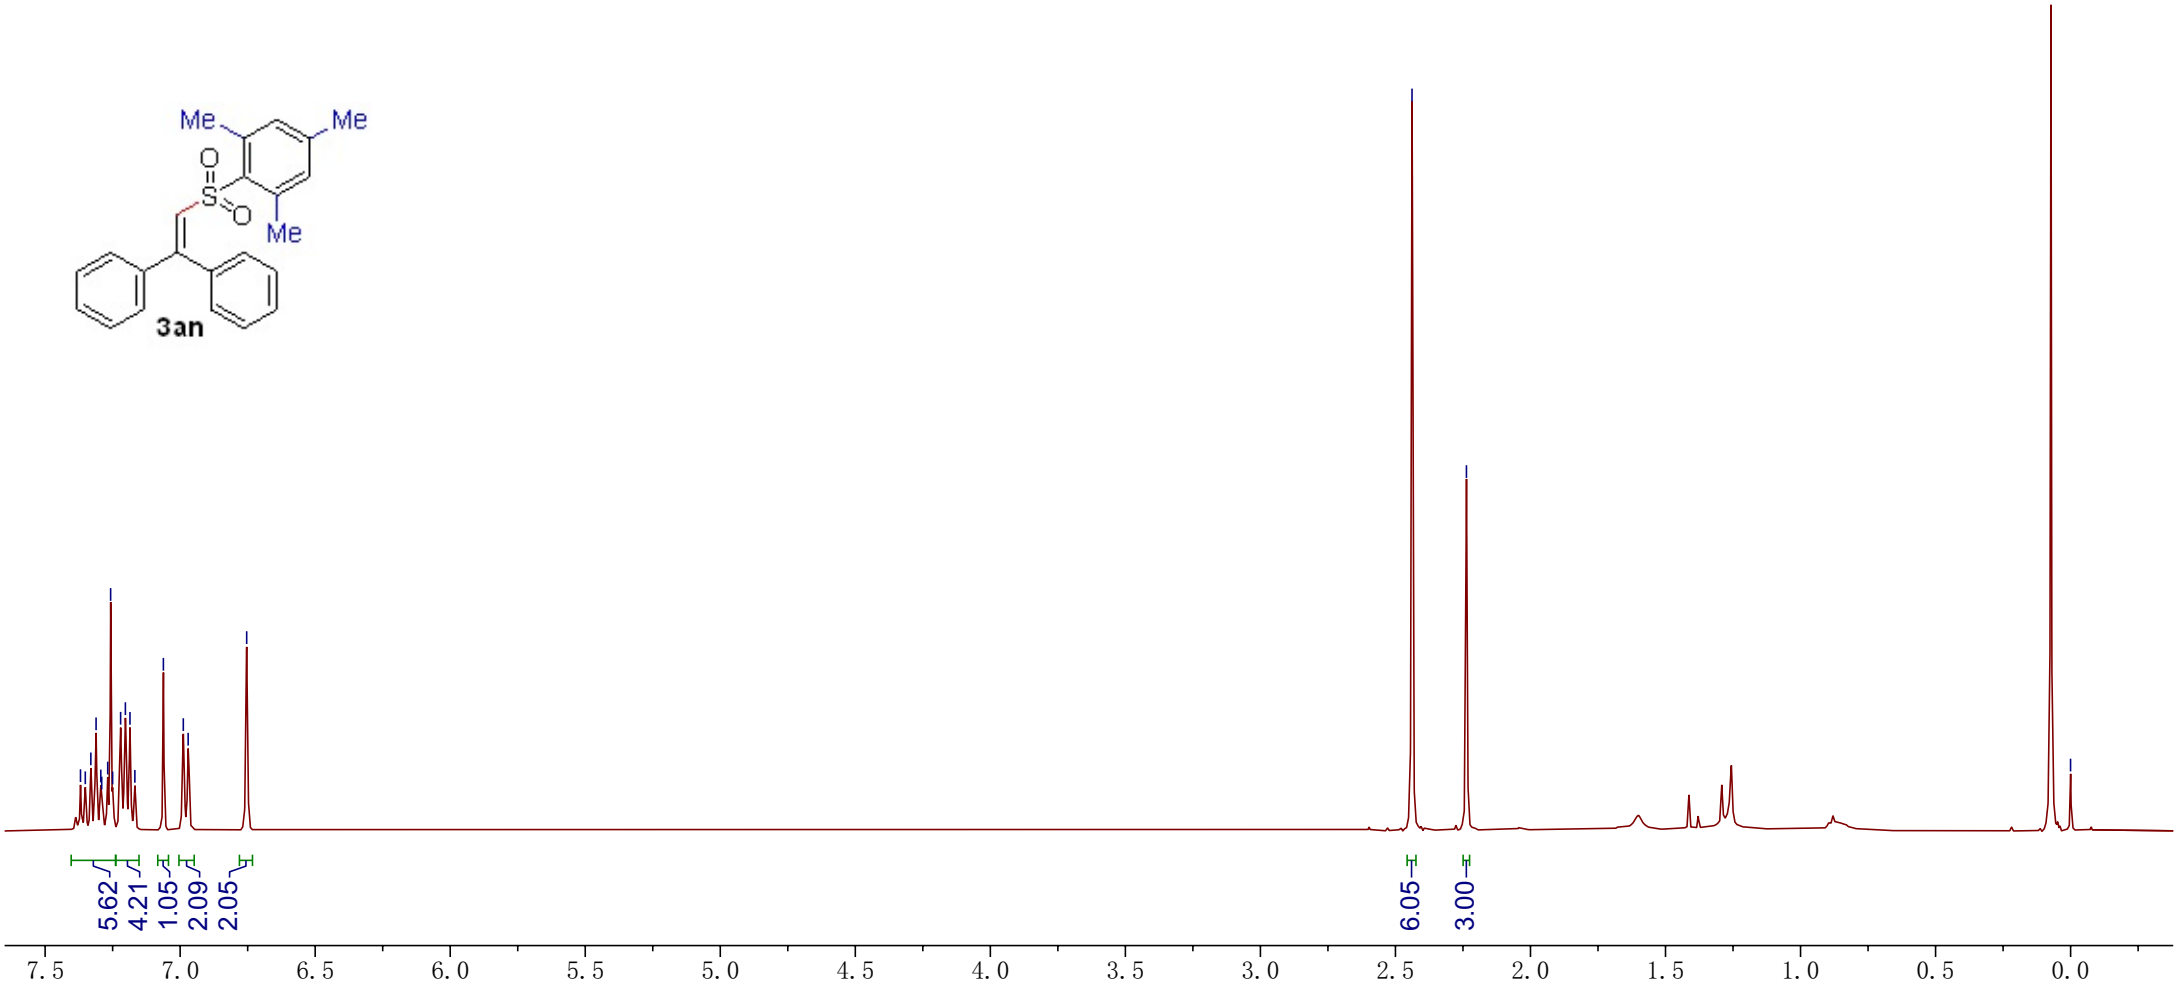

5.62  
4.21  
1.05  
2.09  
2.05

6.05

3.00

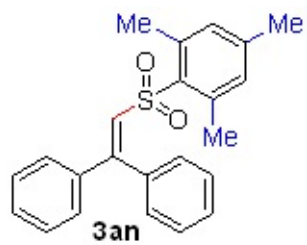

153.19  
142.60  
139.45  
139.25  
135.58  
135.51  
131.77  
131.28  
130.20  
129.21  
128.74  
128.61  
128.09  
127.89

77.48  
77.16  
76.84

22.60  
21.03

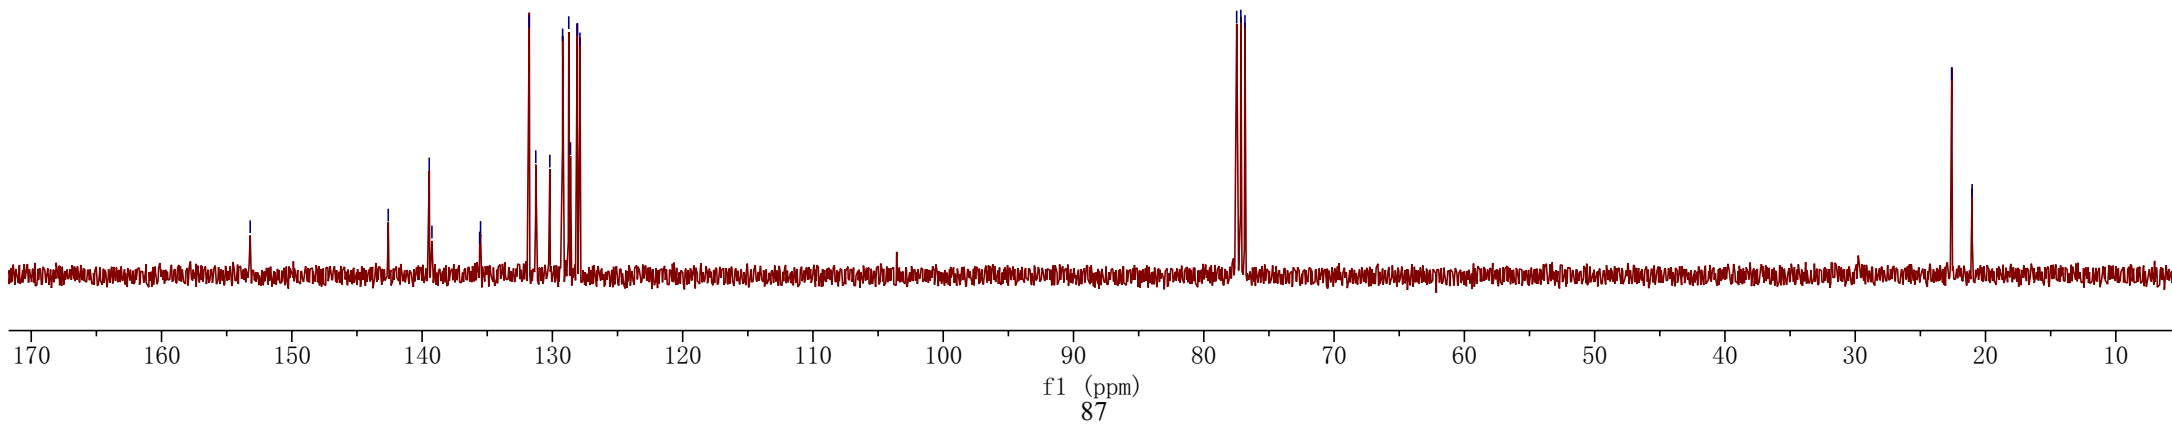

7.28  
7.26  
7.24  
7.22  
7.21  
7.19  
7.16  
7.12  
7.10  
7.08  
7.04  
6.97  
6.95  
6.91

3.97  
3.95  
3.93  
3.92  
3.90

2.80  
2.78  
2.77  
2.75  
2.73

1.16  
1.14  
1.11  
1.09

-0.00

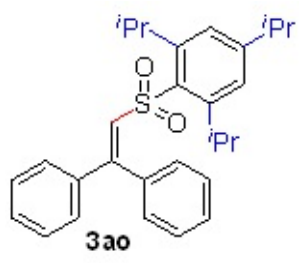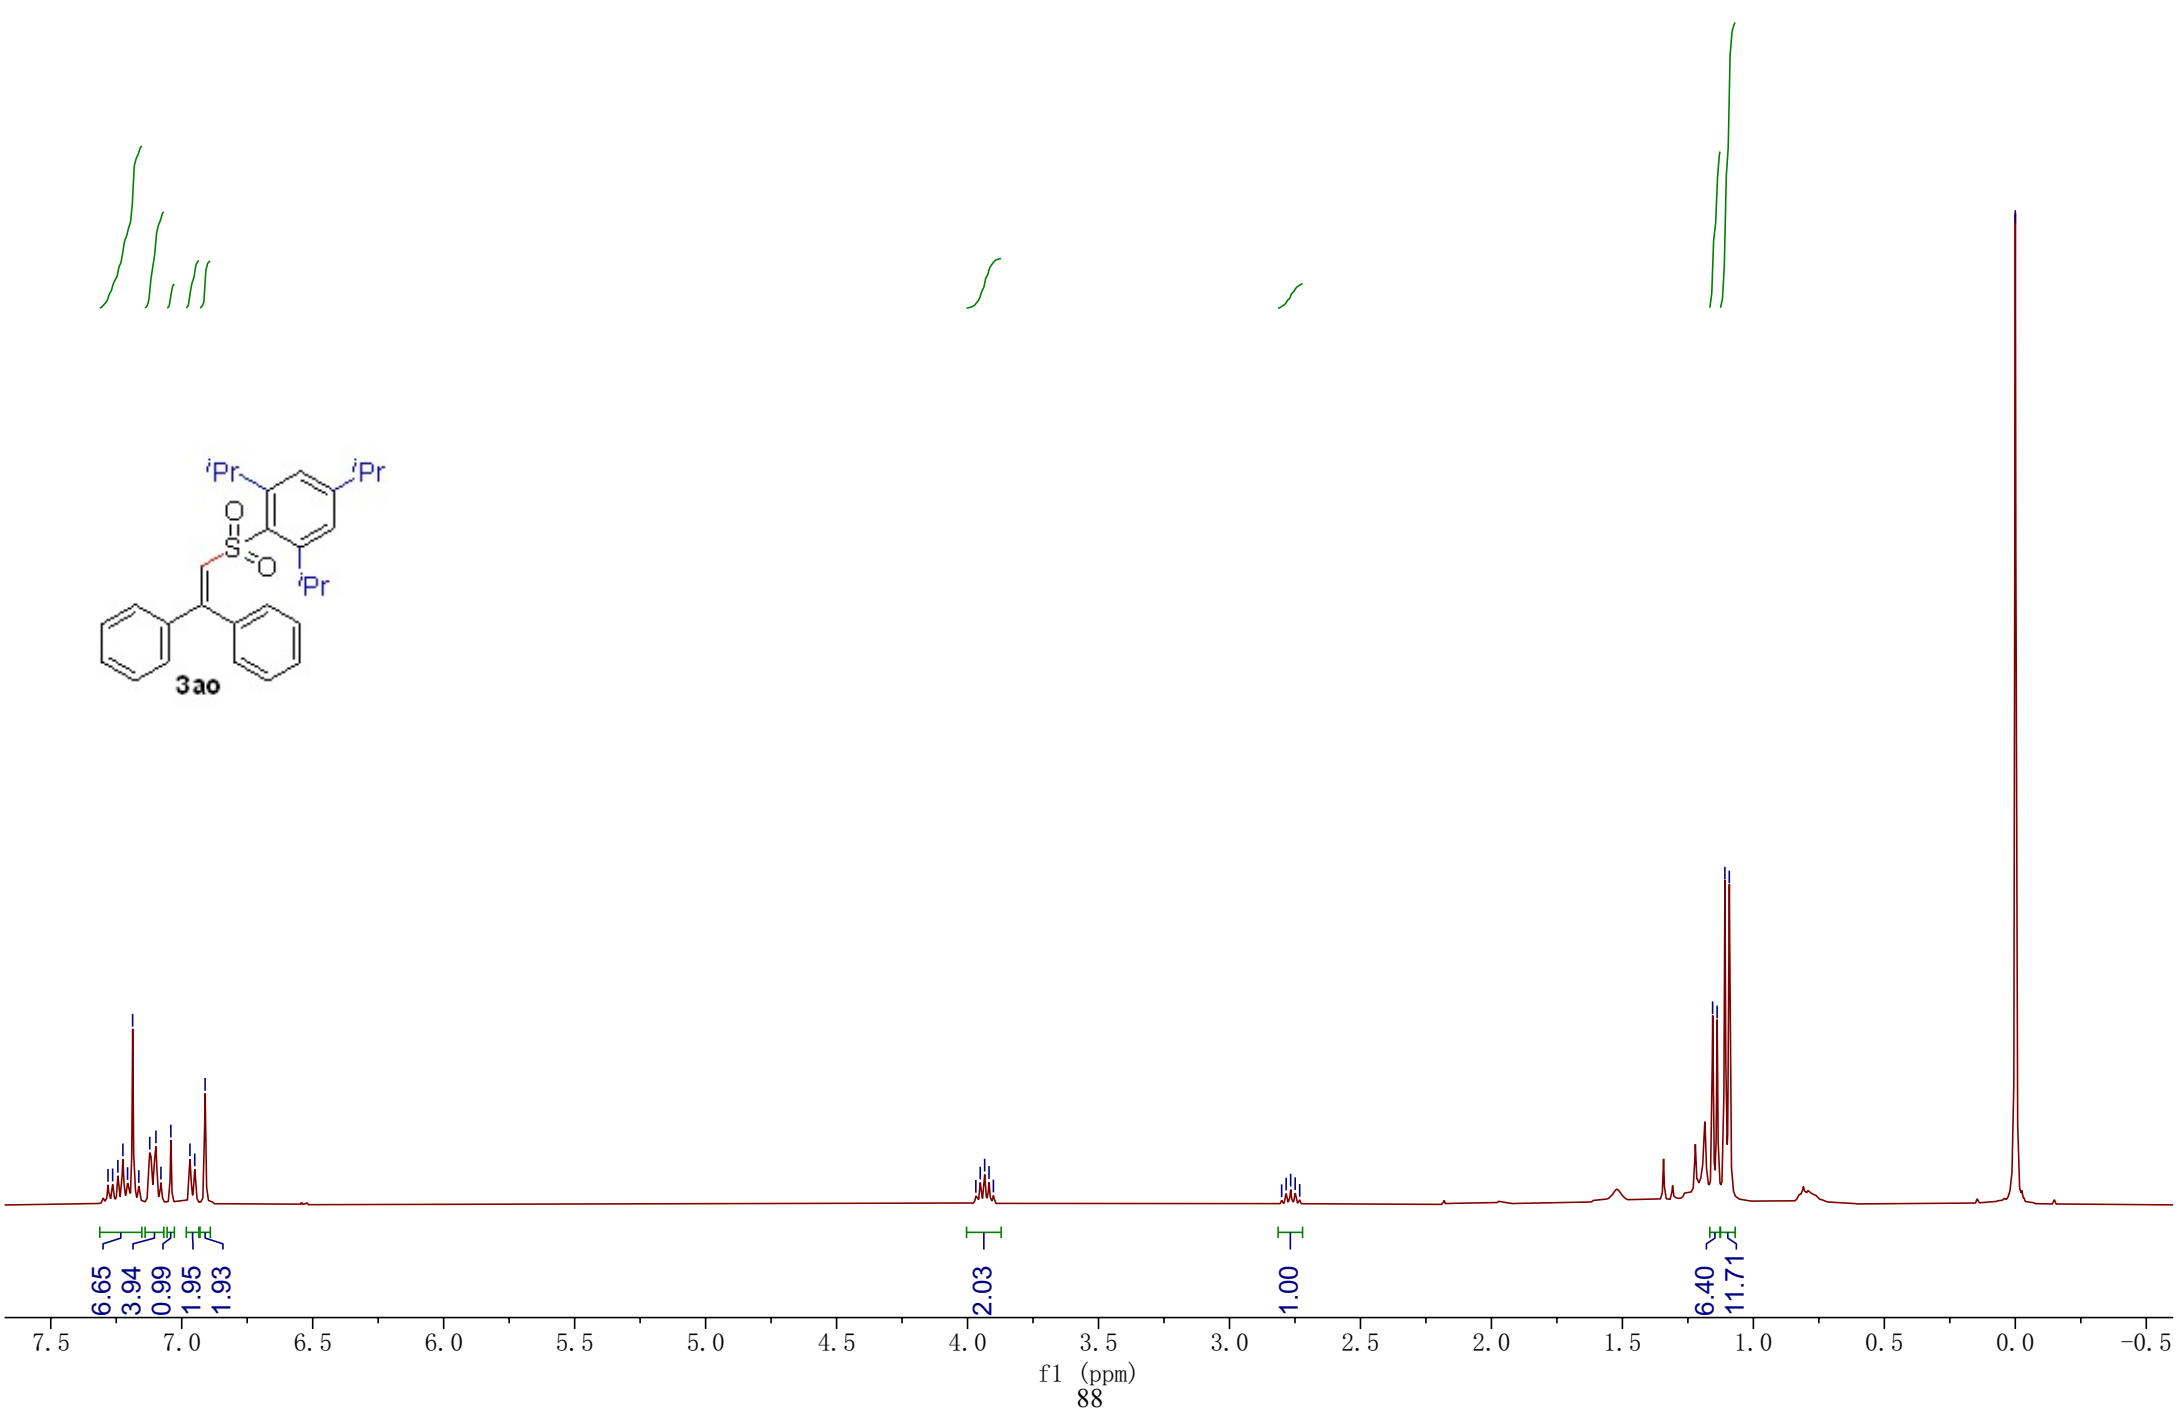



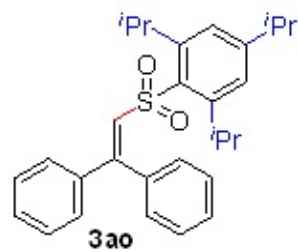

— 153.21  
— 150.37  
139.61  
132.86  
130.04  
129.60  
128.72  
128.58  
128.09  
127.85  
— 123.26

77.48  
77.16  
76.84

— 34.41  
— 29.88  
24.93  
23.78

170 160 150 140 130 120 110 100 90 80 70 60 50 40 30 20

f1 (ppm)  
89

7.97  
7.85  
7.84  
7.82  
7.77  
7.75  
7.67  
7.65  
7.62  
7.61  
7.59  
7.57  
7.55  
7.53  
7.37  
7.35  
7.33  
7.30  
7.28  
7.26  
7.21  
7.19  
7.18  
7.16  
7.10  
7.04  
7.02

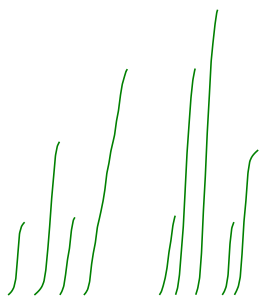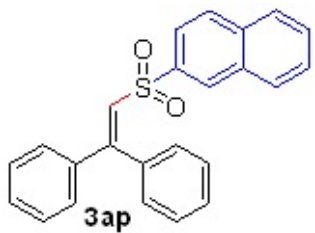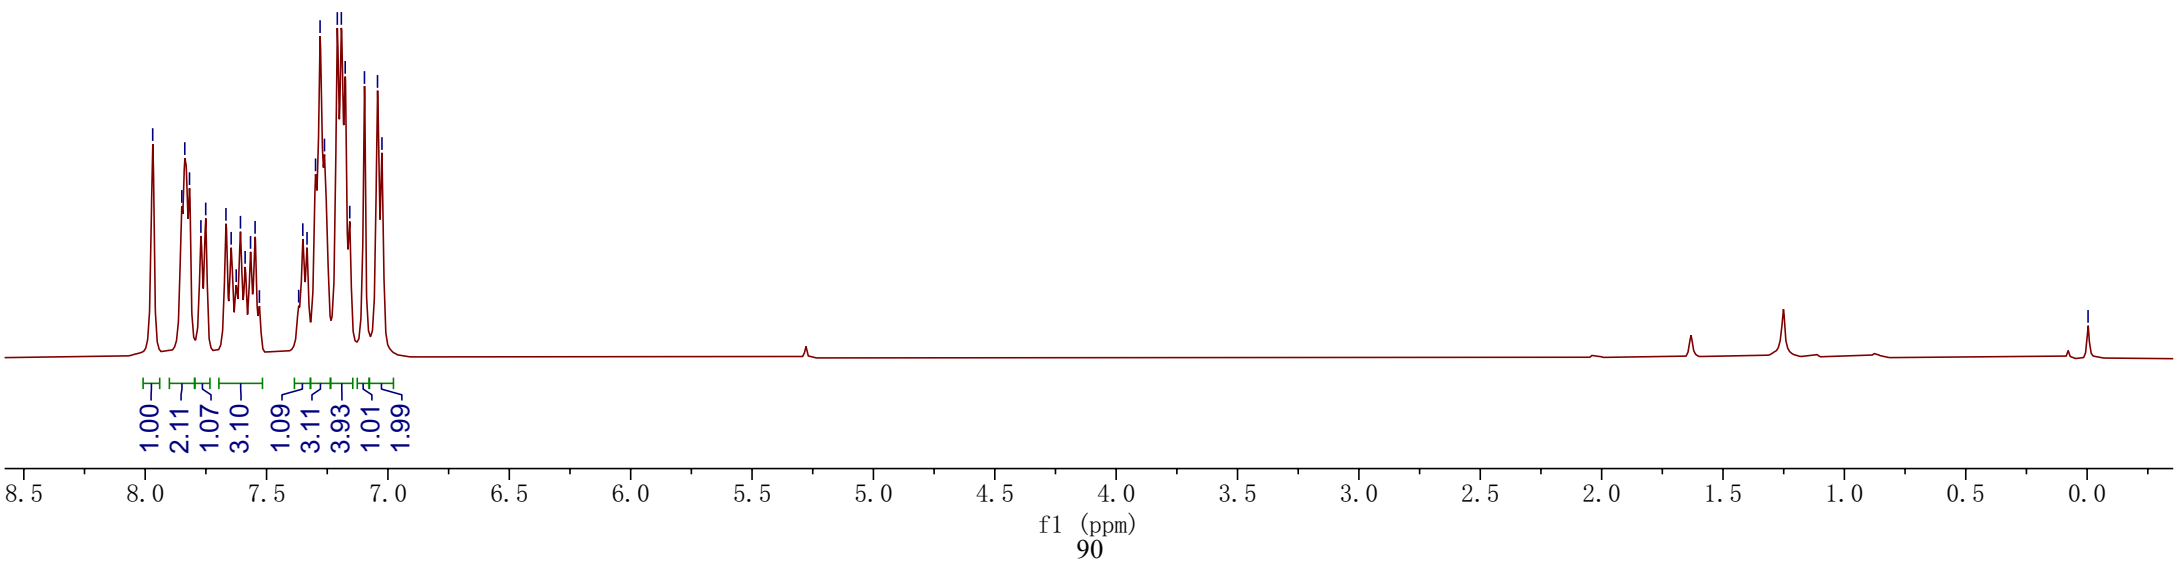

— 0.00

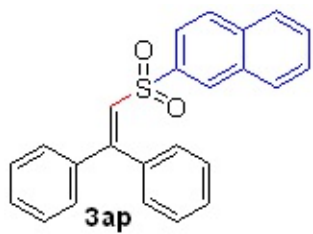

155.46  
139.08  
138.04  
135.34  
134.91  
131.97  
130.46  
129.81  
129.74  
129.45  
129.10  
129.07  
129.03  
128.84  
128.68  
128.29  
127.87  
127.82  
127.39  
122.61

77.48  
77.16  
76.84

130.46  
129.81  
129.74  
129.45  
129.10  
129.07  
129.03  
128.84  
128.68  
128.29  
127.87  
127.82  
127.39

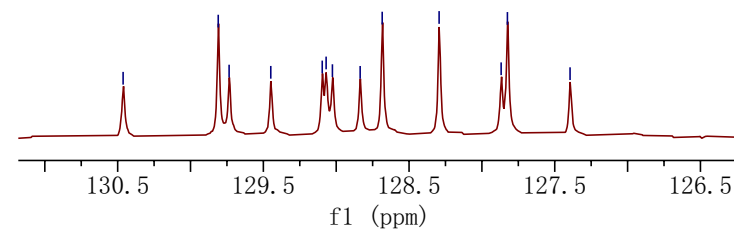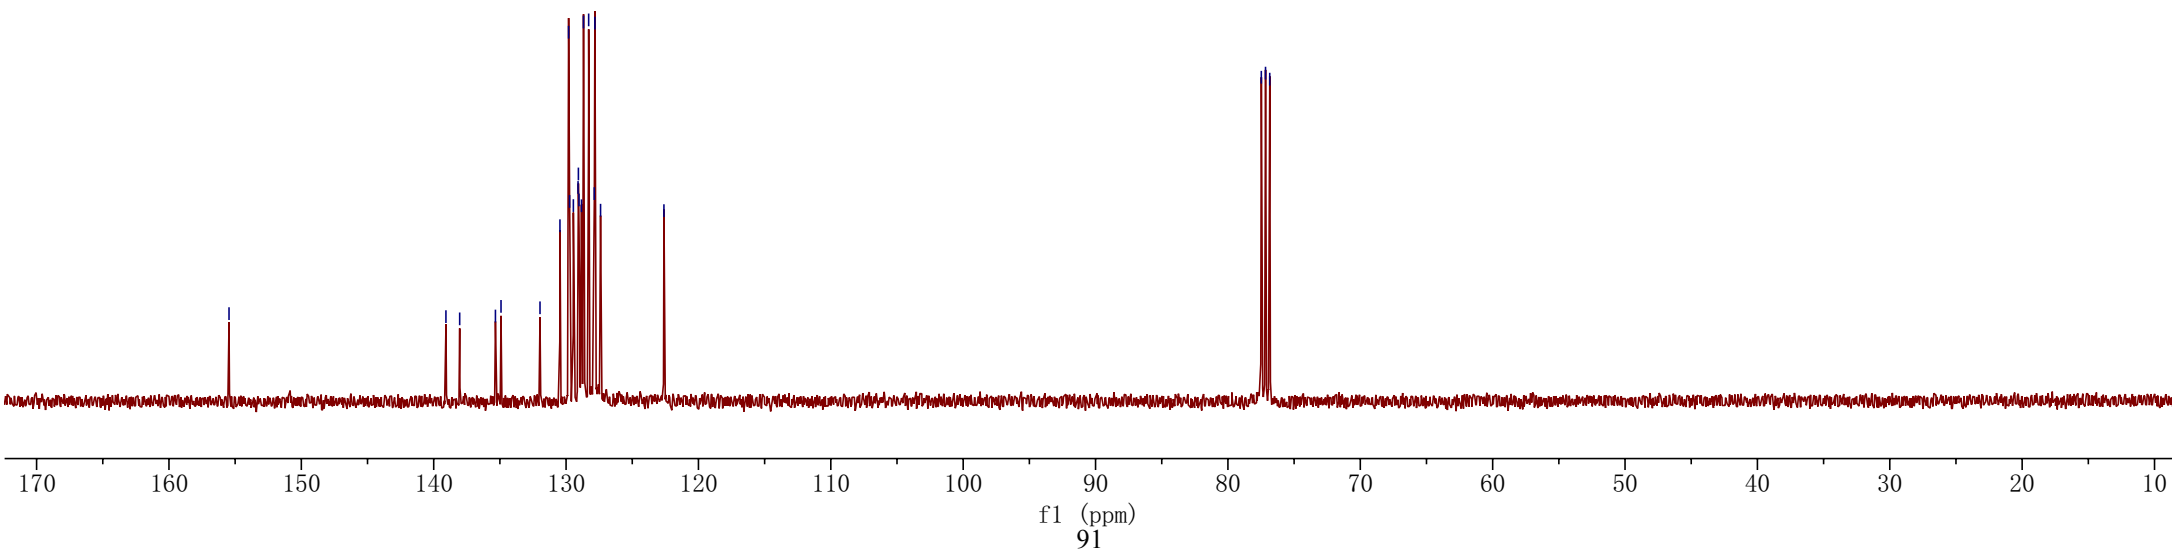

Supplement: d0cc00784f1.pdf [file d0cc00784f1.pdf]
